# Supplementary material
Source: publisher figshare collection journal article supplement (https://acs.figshare.com/ndownloader/files/28376572)
Supplement: Supplementary file 1 [file 28376572]

## Sheet: Sheet1
Confidence Level	Search ID	Processing Node No	Sequence	Unique Sequence ID	PSM Ambiguity	Protein Descriptions	# Proteins	# Protein Groups	Protein Group Accessions	Modifications	Activation Type	DeltaScore	DeltaCn	Rank	Search Engine Rank	q-Value	PEP	Decoy Peptides Matched	Peptides Matched	XCorr	# Missed Cleavages	Isolation Interference [%]	Ion Inject Time [ms]	Intensity	Charge	m/z [Da]	MH+ [Da]	Delta Mass [Da]	Delta Mass [PPM]	RT [min]	First Scan	Last Scan	MS Order	Ions Matched	Matched Ions	Total Ions	Spectrum File	Annotation
High	A	2	HAVSEGTK	11	Unambiguous	Histone H2B type 1-J OS=Homo sapiens OX=9606 GN=HIST1H2BJ PE=1 SV=3 - [H2B1J_HUMAN]|Histone H2B type 1-K OS=Homo sapiens OX=9606 GN=HIST1H2BK PE=1 SV=3 - [H2B1K_HUMAN]	15	2	P06899;O60814		HCD	1	0	1	1	0	2.08e-05	93	86	2.46	0	8	60	1700000	2	414.715	828.422	0	1.36	2.39	796	796	MS2	0/0	0	0	hala.raw
High	A	2	HAVSEGTK	11	Unambiguous	Histone H2B type 1-J OS=Homo sapiens OX=9606 GN=HIST1H2BJ PE=1 SV=3 - [H2B1J_HUMAN]|Histone H2B type 1-K OS=Homo sapiens OX=9606 GN=HIST1H2BK PE=1 SV=3 - [H2B1K_HUMAN]	15	2	P06899;O60814		HCD	1	0	1	1	0	8.38e-06	97	88	2.49	0	19	60	1070000	2	414.714	828.42	0	-0.85	2.9	964	964	MS2	0/0	0	0	hala.raw
High	A	2	HAVSEGTK	11	Unambiguous	Histone H2B type 1-J OS=Homo sapiens OX=9606 GN=HIST1H2BJ PE=1 SV=3 - [H2B1J_HUMAN]|Histone H2B type 1-K OS=Homo sapiens OX=9606 GN=HIST1H2BK PE=1 SV=3 - [H2B1K_HUMAN]	15	2	P06899;O60814		HCD	1	0	1	1	0	0.000137	93	85	2.1	0	9	60	2020000	2	414.714	828.42	0	-1	3.41	1113	1113	MS2	0/0	0	0	hala.raw
High	A	2	HAVSEGTK	11	Unambiguous	Histone H2B type 1-J OS=Homo sapiens OX=9606 GN=HIST1H2BJ PE=1 SV=3 - [H2B1J_HUMAN]|Histone H2B type 1-K OS=Homo sapiens OX=9606 GN=HIST1H2BK PE=1 SV=3 - [H2B1K_HUMAN]	15	2	P06899;O60814		HCD	1	0	1	1	0	0.0001	97	88	2.08	0	12	60	1680000	2	414.714	828.42	0	-0.7	3.91	1258	1258	MS2	0/0	0	0	hala.raw
Middle	A	2	SPDDPSR	127	Unambiguous	Alpha-enolase OS=Homo sapiens OX=9606 GN=ENO1 PE=1 SV=2 - [ENOA_HUMAN]	1	1	P06733		HCD	1	0	1	1	0.025	0.284	24	28	0.89	0	39	60	161000	2	387.175	773.342	0	-0.8	4.13	1322	1322	MS2	0/0	0	0	hala.raw
High	A	2	HAVSEGTK	11	Unambiguous	Histone H2B type 1-J OS=Homo sapiens OX=9606 GN=HIST1H2BJ PE=1 SV=3 - [H2B1J_HUMAN]|Histone H2B type 1-K OS=Homo sapiens OX=9606 GN=HIST1H2BK PE=1 SV=3 - [H2B1K_HUMAN]	15	2	P06899;O60814		HCD	1	0	1	1	0	3.47e-05	91	80	2.14	0	15	60	1470000	2	414.714	828.42	0	-1.15	4.42	1401	1401	MS2	0/0	0	0	hala.raw
High	A	2	HAVSEGTK	11	Unambiguous	Histone H2B type 1-J OS=Homo sapiens OX=9606 GN=HIST1H2BJ PE=1 SV=3 - [H2B1J_HUMAN]|Histone H2B type 1-K OS=Homo sapiens OX=9606 GN=HIST1H2BK PE=1 SV=3 - [H2B1K_HUMAN]	15	2	P06899;O60814		HCD	1	0	1	1	0	0.00998	97	88	1.5	0	17	60	1100000	2	414.714	828.42	0	-0.85	4.93	1538	1538	MS2	0/0	0	0	hala.raw
High	A	2	HAVSEGTK	11	Unambiguous	Histone H2B type 1-J OS=Homo sapiens OX=9606 GN=HIST1H2BJ PE=1 SV=3 - [H2B1J_HUMAN]|Histone H2B type 1-K OS=Homo sapiens OX=9606 GN=HIST1H2BK PE=1 SV=3 - [H2B1K_HUMAN]	15	2	P06899;O60814		HCD	1	0	1	1	0	0.00337	97	88	1.2	0	25	60	978000	2	414.714	828.421	0	-0.56	5.44	1673	1673	MS2	0/0	0	0	hala.raw
Middle	A	2	GNYSER	224	Unambiguous	Histone H2A type 1-B/E OS=Homo sapiens OX=9606 GN=HIST1H2AB PE=1 SV=2 - [H2A1B_HUMAN]	3	1	P04908		HCD	1	0	1	1	0.048	0.458	21	26	0.29	0	63	60	65700	2	363.164	725.32	0	-1.23	5.57	1704	1704	MS2	0/0	0	0	hala.raw
Middle	A	2	IAGEASR	230	Unambiguous	Histone H2B type 1-J OS=Homo sapiens OX=9606 GN=HIST1H2BJ PE=1 SV=3 - [H2B1J_HUMAN]|Histone H2B type 1-K OS=Homo sapiens OX=9606 GN=HIST1H2BK PE=1 SV=3 - [H2B1K_HUMAN]	14	2	P06899;O60814		HCD	1	0	1	1	0.016	0.217	222	232	0.81	0	30	60	92200	2	352.19	703.373	0	-0.65	5.62	1717	1717	MS2	0/0	0	0	hala.raw
High	A	2	TVDGPSGK	236	Unambiguous	Glyceraldehyde-3-phosphate dehydrogenase OS=Homo sapiens OX=9606 GN=GAPDH PE=1 SV=3 - [G3P_HUMAN]	1	1	P04406		HCD	1	0	1	1	0.005	0.0682	147	149	0.78	0	38	60	359000	2	380.695	760.383	0	-1.14	5.72	1741	1741	MS2	0/0	0	0	hala.raw
High	A	2	HAVSEGTK	11	Unambiguous	Histone H2B type 1-J OS=Homo sapiens OX=9606 GN=HIST1H2BJ PE=1 SV=3 - [H2B1J_HUMAN]|Histone H2B type 1-K OS=Homo sapiens OX=9606 GN=HIST1H2BK PE=1 SV=3 - [H2B1K_HUMAN]	15	2	P06899;O60814		HCD	1	0	1	1	0	0.00846	97	88	1.45	0	31	60	872000	2	414.714	828.42	0	-0.85	5.95	1796	1796	MS2	0/0	0	0	hala.raw
High	A	2	IAGEASR	230	Unambiguous	Histone H2B type 1-J OS=Homo sapiens OX=9606 GN=HIST1H2BJ PE=1 SV=3 - [H2B1J_HUMAN]|Histone H2B type 1-K OS=Homo sapiens OX=9606 GN=HIST1H2BK PE=1 SV=3 - [H2B1K_HUMAN]	14	2	P06899;O60814		HCD	1	0	1	1	0.001	0.0135	222	232	1.38	0	3	60	654000	2	352.19	703.373	0	-0.13	6.12	1840	1840	MS2	0/0	0	0	hala.raw
Middle	A	2	TVDGPSGK	236	Unambiguous	Glyceraldehyde-3-phosphate dehydrogenase OS=Homo sapiens OX=9606 GN=GAPDH PE=1 SV=3 - [G3P_HUMAN]	1	1	P04406		HCD	1	0	1	1	0.011	0.149	147	149	0.84	0	65	60	151000	2	380.695	760.383	0	-0.97	6.23	1862	1862	MS2	0/0	0	0	hala.raw
Middle	A	2	EAAEMGK	286	Unambiguous	Elongation factor 1-alpha 1 OS=Homo sapiens OX=9606 GN=EEF1A1 PE=1 SV=1 - [EF1A1_HUMAN]|Elongation factor 1-alpha 2 OS=Homo sapiens OX=9606 GN=EEF1A2 PE=1 SV=1 - [EF1A2_HUMAN]	3	2	P68104;Q05639		HCD	1	0	1	1	0.026	0.3	69	56	0.67	0	67	60	61800	2	368.171	735.334	0	-0.09	6.25	1868	1868	MS2	0/0	0	0	hala.raw
Middle	A	2	YSPNcK	291	Unambiguous	L-lactate dehydrogenase A chain OS=Homo sapiens OX=9606 GN=LDHA PE=1 SV=2 - [LDHA_HUMAN]	1	1	P00338	C5(Carbamidomethyl)	HCD	1	0	1	1	0.032	0.351	52	47	0.65	0	68	60	111000	2	384.671	768.334	0	-0.23	6.3	1879	1879	MS2	0/0	0	0	hala.raw
High	A	2	HAVSEGTK	11	Unambiguous	Histone H2B type 1-J OS=Homo sapiens OX=9606 GN=HIST1H2BJ PE=1 SV=3 - [H2B1J_HUMAN]|Histone H2B type 1-K OS=Homo sapiens OX=9606 GN=HIST1H2BK PE=1 SV=3 - [H2B1K_HUMAN]	15	2	P06899;O60814		HCD	1	0	1	1	0.004	0.0539	97	88	1.1	0	29	60	772000	2	414.714	828.421	0	0.03	6.46	1913	1913	MS2	0/0	0	0	hala.raw
Middle	A	2	IAGEASR	230	Unambiguous	Histone H2B type 1-J OS=Homo sapiens OX=9606 GN=HIST1H2BJ PE=1 SV=3 - [H2B1J_HUMAN]|Histone H2B type 1-K OS=Homo sapiens OX=9606 GN=HIST1H2BK PE=1 SV=3 - [H2B1K_HUMAN]	14	2	P06899;O60814		HCD	1	0	1	1	0.013	0.181	222	232	1.31	0	6	60	361000	2	352.19	703.374	0	0.21	6.63	1955	1955	MS2	0/0	0	0	hala.raw
High	A	2	QLEDGR	327	Unambiguous	Ubiquitin-40S ribosomal protein S27a OS=Homo sapiens OX=9606 GN=RPS27A PE=1 SV=2 - [RS27A_HUMAN]	4	1	P62979		HCD	1	0	1	1	0.007	0.0939	112	96	0.98	0	64	60	297000	2	359.18	717.353	0	1.13	6.84	2003	2003	MS2	0/0	0	0	hala.raw
Middle	A	2	KLEDGPK	343	Unambiguous	Elongation factor 1-alpha 1 OS=Homo sapiens OX=9606 GN=EEF1A1 PE=1 SV=1 - [EF1A1_HUMAN]	2	1	P68104		HCD	1	0	1	1	0.012	0.174	89	95	1.11	1	37	60	454000	2	393.722	786.436	0	0.33	6.98	2038	2038	MS2	0/0	0	0	hala.raw
Middle	A	2	IAGEASR	230	Selected	Histone H2B type 1-J OS=Homo sapiens OX=9606 GN=HIST1H2BJ PE=1 SV=3 - [H2B1J_HUMAN]|Histone H2B type 1-K OS=Homo sapiens OX=9606 GN=HIST1H2BK PE=1 SV=3 - [H2B1K_HUMAN]	14	2	P06899;O60814		HCD	0.0476	0	1	1	0.022	0.255	228	240	1.26	0	19	60	323000	2	352.191	703.374	0	0.65	7.13	2077	2077	MS2	0/0	0	0	hala.raw
Middle	A	2	IANETR	357	Rejected	Beta-glucuronidase OS=Homo sapiens OX=9606 GN=GUSB PE=1 SV=2 - [BGLR_HUMAN]	1	1	P08236		HCD		0.0476	2	2	0.028	0.316	228	240	1.2	0	19	60	323000	2	352.191	703.374	0	0.66	7.13	2077	2077	MS2	0/0	0	0	hala.raw
High	A	2	GScFHR	364	Unambiguous	Peptidyl-prolyl cis-trans isomerase A OS=Homo sapiens OX=9606 GN=PPIA PE=1 SV=2 - [PPIA_HUMAN]	6	1	P62937	C3(Carbamidomethyl)	HCD	1	0	1	1	0.004	0.0535	18	20	0.94	0	15	60	438000	2	382.169	763.331	0	0.78	7.25	2104	2104	MS2	0/0	0	0	hala.raw
Middle	A	2	EAAEMGK	286	Unambiguous	Elongation factor 1-alpha 1 OS=Homo sapiens OX=9606 GN=EEF1A1 PE=1 SV=1 - [EF1A1_HUMAN]|Elongation factor 1-alpha 2 OS=Homo sapiens OX=9606 GN=EEF1A2 PE=1 SV=1 - [EF1A2_HUMAN]	3	2	P68104;Q05639		HCD	1	0	1	1	0.021	0.252	69	56	0.65	0	60	60	83000	2	368.171	735.335	0	0.41	7.26	2109	2109	MS2	0/0	0	0	hala.raw
Middle	A	2	HIAEEADR	380	Unambiguous	Tropomyosin alpha-3 chain OS=Homo sapiens OX=9606 GN=TPM3 PE=1 SV=2 - [TPM3_HUMAN]|Tropomyosin alpha-4 chain OS=Homo sapiens OX=9606 GN=TPM4 PE=1 SV=3 - [TPM4_HUMAN]	2	2	P06753;P67936		HCD	1	0	1	1	0.022	0.255	102	116	0.73	0	19	60	384000	2	470.728	940.449	0	0.48	7.37	2140	2140	MS2	0/0	0	0	hala.raw
High	A	2	KLEDGPK	343	Unambiguous	Elongation factor 1-alpha 1 OS=Homo sapiens OX=9606 GN=EEF1A1 PE=1 SV=1 - [EF1A1_HUMAN]	2	1	P68104		HCD	1	0	1	1	0.007	0.0924	99	105	1.22	1	34	60	237000	2	393.722	786.436	0	0.95	7.48	2179	2179	MS2	0/0	0	0	hala.raw
High	A	2	LTPQGQR	432	Unambiguous	40S ribosomal protein S19 OS=Homo sapiens OX=9606 GN=RPS19 PE=1 SV=2 - [RS19_HUMAN]	1	1	P39019		HCD	1	0	1	1	0.008	0.117	105	109	0.88	0	20	60	138000	2	400.225	799.442	0	0.09	7.62	2221	2221	MS2	0/0	0	0	hala.raw
High	A	2	TVDGPSGK	236	Unambiguous	Glyceraldehyde-3-phosphate dehydrogenase OS=Homo sapiens OX=9606 GN=GAPDH PE=1 SV=3 - [G3P_HUMAN]	1	1	P04406		HCD	1	0	1	1	0.003	0.0443	148	149	0.83	0	50	60	138000	2	380.695	760.384	0	-0.09	7.92	2295	2295	MS2	0/0	0	0	hala.raw
Middle	A	2	HAVSEGTK	11	Unambiguous	Histone H2B type 1-J OS=Homo sapiens OX=9606 GN=HIST1H2BJ PE=1 SV=3 - [H2B1J_HUMAN]|Histone H2B type 1-K OS=Homo sapiens OX=9606 GN=HIST1H2BK PE=1 SV=3 - [H2B1K_HUMAN]	15	2	P06899;O60814		HCD	1	0	1	1	0.012	0.166	93	86	0.96	0	43	60	365000	2	414.715	828.422	0	1.51	7.99	2311	2311	MS2	0/0	0	0	hala.raw
Middle	A	2	NDEELNK	474	Unambiguous	Histone H2A type 1-A OS=Homo sapiens OX=9606 GN=HIST1H2AA PE=1 SV=3 - [H2A1A_HUMAN]|Histone H2A type 1-B/E OS=Homo sapiens OX=9606 GN=HIST1H2AB PE=1 SV=2 - [H2A1B_HUMAN]	13	2	Q96QV6;P04908		HCD	1	0	1	1	0.023	0.263	62	71	0.69	0	46	60	731000	2	431.202	861.396	0	1.05	7.99	2312	2312	MS2	0/0	0	0	hala.raw
High	A	2	IAGEASR	230	Unambiguous	Histone H2B type 1-J OS=Homo sapiens OX=9606 GN=HIST1H2BJ PE=1 SV=3 - [H2B1J_HUMAN]|Histone H2B type 1-K OS=Homo sapiens OX=9606 GN=HIST1H2BK PE=1 SV=3 - [H2B1K_HUMAN]	14	2	P06899;O60814		HCD	1	0	1	1	0.007	0.0961	232	243	0.82	0	12	60	270000	2	352.191	703.375	0	1.69	8.19	2361	2361	MS2	0/0	0	0	hala.raw
Middle	A	2	KLEDGPK	343	Unambiguous	Elongation factor 1-alpha 1 OS=Homo sapiens OX=9606 GN=EEF1A1 PE=1 SV=1 - [EF1A1_HUMAN]	2	1	P68104		HCD	1	0	1	2	0.041	0.415	89	95	0.98	1	35	60	231000	2	393.722	786.436	0	0.64	8.49	2436	2436	MS2	0/0	0	0	hala.raw
High	A	2	NDEELNK	474	Unambiguous	Histone H2A type 1-A OS=Homo sapiens OX=9606 GN=HIST1H2AA PE=1 SV=3 - [H2A1A_HUMAN]|Histone H2A type 1-B/E OS=Homo sapiens OX=9606 GN=HIST1H2AB PE=1 SV=2 - [H2A1B_HUMAN]	13	2	Q96QV6;P04908		HCD	1	0	1	1	0.002	0.0274	62	71	0.98	0	35	60	1140000	2	431.202	861.396	0	1.2	8.5	2440	2440	MS2	0/0	0	0	hala.raw
Middle	A	2	HAVSEGTK	11	Unambiguous	Histone H2B type 1-J OS=Homo sapiens OX=9606 GN=HIST1H2BJ PE=1 SV=3 - [H2B1J_HUMAN]|Histone H2B type 1-K OS=Homo sapiens OX=9606 GN=HIST1H2BK PE=1 SV=3 - [H2B1K_HUMAN]	15	2	P06899;O60814		HCD	1	0	1	1	0.012	0.17	93	86	0.88	0	42	60	306000	2	414.715	828.422	0	1.51	8.51	2441	2441	MS2	0/0	0	0	hala.raw
High	A	2	IAGEASR	230	Unambiguous	Histone H2B type 1-J OS=Homo sapiens OX=9606 GN=HIST1H2BJ PE=1 SV=3 - [H2B1J_HUMAN]|Histone H2B type 1-K OS=Homo sapiens OX=9606 GN=HIST1H2BK PE=1 SV=3 - [H2B1K_HUMAN]	14	2	P06899;O60814		HCD	1	0	1	1	0.004	0.0585	234	244	1.06	0	8	60	240000	2	352.191	703.374	0	1.52	8.69	2486	2486	MS2	0/0	0	0	hala.raw
High	A	2	LAEQAER	554	Unambiguous	14-3-3 protein beta/alpha OS=Homo sapiens OX=9606 GN=YWHAB PE=1 SV=3 - [1433B_HUMAN]|14-3-3 protein theta OS=Homo sapiens OX=9606 GN=YWHAQ PE=1 SV=1 - [1433T_HUMAN]|14-3-3 protein gamma OS=Homo sapiens OX=9606 GN=YWHAG PE=1 SV=2 - [1433G_HUMAN]|14-3-3 protein epsilon OS=Homo sapiens OX=9606 GN=YWHAE PE=1 SV=1 - [1433E_HUMAN]|14-3-3 protein sigma OS=Homo sapiens OX=9606 GN=SFN PE=1 SV=1 - [1433S_H…	7	7	P31946;P27348;P61981;P62258;P31947;P63104;Q04917		HCD	1	0	1	1	0	0.00815	124	123	1.27	0	51	60	172000	2	408.714	816.421	0	-0.5	8.96	2554	2554	MS2	0/0	0	0	hala.raw
Middle	A	2	NDEELNK	474	Unambiguous	Histone H2A type 1-A OS=Homo sapiens OX=9606 GN=HIST1H2AA PE=1 SV=3 - [H2A1A_HUMAN]|Histone H2A type 1-B/E OS=Homo sapiens OX=9606 GN=HIST1H2AB PE=1 SV=2 - [H2A1B_HUMAN]	13	2	Q96QV6;P04908		HCD	1	0	1	1	0.039	0.404	62	71	0.71	0	46	60	836000	2	431.201	861.396	0	0.91	9.02	2569	2569	MS2	0/0	0	0	hala.raw
High	A	2	IAGEASR	230	Unambiguous	Histone H2B type 1-J OS=Homo sapiens OX=9606 GN=HIST1H2BJ PE=1 SV=3 - [H2B1J_HUMAN]|Histone H2B type 1-K OS=Homo sapiens OX=9606 GN=HIST1H2BK PE=1 SV=3 - [H2B1K_HUMAN]	14	2	P06899;O60814		HCD	1	0	1	1	0.009	0.135	232	243	1.28	0	12	60	190000	2	352.191	703.375	0	1.86	9.19	2607	2607	MS2	0/0	0	0	hala.raw
High	A	2	LAEQAER	554	Unambiguous	14-3-3 protein beta/alpha OS=Homo sapiens OX=9606 GN=YWHAB PE=1 SV=3 - [1433B_HUMAN]|14-3-3 protein theta OS=Homo sapiens OX=9606 GN=YWHAQ PE=1 SV=1 - [1433T_HUMAN]|14-3-3 protein gamma OS=Homo sapiens OX=9606 GN=YWHAG PE=1 SV=2 - [1433G_HUMAN]|14-3-3 protein epsilon OS=Homo sapiens OX=9606 GN=YWHAE PE=1 SV=1 - [1433E_HUMAN]|14-3-3 protein sigma OS=Homo sapiens OX=9606 GN=SFN PE=1 SV=1 - [1433S_H…	7	7	P31946;P27348;P61981;P62258;P31947;P63104;Q04917		HCD	1	0	1	1	0	0.00575	128	128	1	0	20	60	386000	2	408.714	816.422	0	0.69	9.47	2676	2676	MS2	0/0	0	0	hala.raw
Middle	A	2	EAAEMGK	286	Unambiguous	Elongation factor 1-alpha 1 OS=Homo sapiens OX=9606 GN=EEF1A1 PE=1 SV=1 - [EF1A1_HUMAN]|Elongation factor 1-alpha 2 OS=Homo sapiens OX=9606 GN=EEF1A2 PE=1 SV=1 - [EF1A2_HUMAN]	3	2	P68104;Q05639		HCD	1	0	1	1	0.027	0.312	96	81	0.74	0	75	60	44000	2	368.171	735.334	0	-0.26	9.56	2700	2700	MS2	0/0	0	0	hala.raw
Middle	A	2	NDEELNK	474	Unambiguous	Histone H2A type 1-A OS=Homo sapiens OX=9606 GN=HIST1H2AA PE=1 SV=3 - [H2A1A_HUMAN]|Histone H2A type 1-B/E OS=Homo sapiens OX=9606 GN=HIST1H2AB PE=1 SV=2 - [H2A1B_HUMAN]	13	2	Q96QV6;P04908		HCD	1	0	1	1	0.043	0.429	62	71	0.73	0	51	60	666000	2	431.202	861.396	0	1.2	9.66	2726	2726	MS2	0/0	0	0	hala.raw
Middle	A	2	IAGEASR	230	Unambiguous	Histone H2B type 1-J OS=Homo sapiens OX=9606 GN=HIST1H2BJ PE=1 SV=3 - [H2B1J_HUMAN]|Histone H2B type 1-K OS=Homo sapiens OX=9606 GN=HIST1H2BK PE=1 SV=3 - [H2B1K_HUMAN]	14	2	P06899;O60814		HCD	1	0	1	1	0.012	0.168	234	244	0.93	0	15	60	145000	2	352.191	703.374	0	1.52	9.71	2737	2737	MS2	0/0	0	0	hala.raw
Middle	A	2	IAGEASR	230	Unambiguous	Histone H2B type 1-J OS=Homo sapiens OX=9606 GN=HIST1H2BJ PE=1 SV=3 - [H2B1J_HUMAN]|Histone H2B type 1-K OS=Homo sapiens OX=9606 GN=HIST1H2BK PE=1 SV=3 - [H2B1K_HUMAN]	14	2	P06899;O60814		HCD	1	0	1	1	0.01	0.145	232	243	0.9	0	13	60	98100	2	352.191	703.375	0	1.6	10.21	2858	2858	MS2	0/0	0	0	hala.raw
Middle	A	2	NDEELNK	474	Unambiguous	Histone H2A type 1-A OS=Homo sapiens OX=9606 GN=HIST1H2AA PE=1 SV=3 - [H2A1A_HUMAN]|Histone H2A type 1-B/E OS=Homo sapiens OX=9606 GN=HIST1H2AB PE=1 SV=2 - [H2A1B_HUMAN]	13	2	Q96QV6;P04908		HCD	1	0	1	1	0.011	0.154	62	71	0.75	0	47	60	744000	2	431.201	861.395	0	0.7	10.31	2882	2882	MS2	0/0	0	0	hala.raw
High	A	2	LAEQAER	554	Unambiguous	14-3-3 protein beta/alpha OS=Homo sapiens OX=9606 GN=YWHAB PE=1 SV=3 - [1433B_HUMAN]|14-3-3 protein theta OS=Homo sapiens OX=9606 GN=YWHAQ PE=1 SV=1 - [1433T_HUMAN]|14-3-3 protein gamma OS=Homo sapiens OX=9606 GN=YWHAG PE=1 SV=2 - [1433G_HUMAN]|14-3-3 protein epsilon OS=Homo sapiens OX=9606 GN=YWHAE PE=1 SV=1 - [1433E_HUMAN]|14-3-3 protein sigma OS=Homo sapiens OX=9606 GN=SFN PE=1 SV=1 - [1433S_H…	7	7	P31946;P27348;P61981;P62258;P31947;P63104;Q04917		HCD	1	0	1	1	0.004	0.0531	128	124	1.09	0	57	60	139000	2	408.715	816.422	0	1.14	10.49	2930	2930	MS2	0/0	0	0	hala.raw
High	A	2	IAGEASR	230	Unambiguous	Histone H2B type 1-J OS=Homo sapiens OX=9606 GN=HIST1H2BJ PE=1 SV=3 - [H2B1J_HUMAN]|Histone H2B type 1-K OS=Homo sapiens OX=9606 GN=HIST1H2BK PE=1 SV=3 - [H2B1K_HUMAN]	14	2	P06899;O60814		HCD	1	0	1	1	0.007	0.0947	232	243	0.78	0	18	60	93500	2	352.191	703.375	0	2.04	10.71	2983	2983	MS2	0/0	0	0	hala.raw
High	A	2	LAEQAER	554	Unambiguous	14-3-3 protein beta/alpha OS=Homo sapiens OX=9606 GN=YWHAB PE=1 SV=3 - [1433B_HUMAN]|14-3-3 protein theta OS=Homo sapiens OX=9606 GN=YWHAQ PE=1 SV=1 - [1433T_HUMAN]|14-3-3 protein gamma OS=Homo sapiens OX=9606 GN=YWHAG PE=1 SV=2 - [1433G_HUMAN]|14-3-3 protein epsilon OS=Homo sapiens OX=9606 GN=YWHAE PE=1 SV=1 - [1433E_HUMAN]|14-3-3 protein sigma OS=Homo sapiens OX=9606 GN=SFN PE=1 SV=1 - [1433S_H…	7	7	P31946;P27348;P61981;P62258;P31947;P63104;Q04917		HCD	1	0	1	1	0.002	0.0273	128	128	0.66	0	52	60	105000	2	408.714	816.421	0	0.24	10.99	3051	3051	MS2	0/0	0	0	hala.raw
High	A	2	IAGEASR	230	Unambiguous	Histone H2B type 1-J OS=Homo sapiens OX=9606 GN=HIST1H2BJ PE=1 SV=3 - [H2B1J_HUMAN]|Histone H2B type 1-K OS=Homo sapiens OX=9606 GN=HIST1H2BK PE=1 SV=3 - [H2B1K_HUMAN]	14	2	P06899;O60814		HCD	1	0	1	1	0.007	0.0993	232	243	0.77	0	23	60	106000	2	352.191	703.375	0	1.6	11.22	3113	3113	MS2	0/0	0	0	hala.raw
High	A	2	LAEQAER	554	Unambiguous	14-3-3 protein beta/alpha OS=Homo sapiens OX=9606 GN=YWHAB PE=1 SV=3 - [1433B_HUMAN]|14-3-3 protein theta OS=Homo sapiens OX=9606 GN=YWHAQ PE=1 SV=1 - [1433T_HUMAN]|14-3-3 protein gamma OS=Homo sapiens OX=9606 GN=YWHAG PE=1 SV=2 - [1433G_HUMAN]|14-3-3 protein epsilon OS=Homo sapiens OX=9606 GN=YWHAE PE=1 SV=1 - [1433E_HUMAN]|14-3-3 protein sigma OS=Homo sapiens OX=9606 GN=SFN PE=1 SV=1 - [1433S_H…	7	7	P31946;P27348;P61981;P62258;P31947;P63104;Q04917		HCD	1	0	1	1	0.004	0.0522	128	128	0.99	0	59	60	96500	2	408.714	816.421	0	0.47	11.5	3186	3186	MS2	0/0	0	0	hala.raw
High	A	2	ETIEQEK	741	Unambiguous	Thymosin beta-4 OS=Homo sapiens OX=9606 GN=TMSB4X PE=1 SV=2 - [TYB4_HUMAN]	2	1	P62328		HCD	1	0	1	1	0.009	0.133	152	158	1	0	6	60	505000	2	438.72	876.433	0	2.04	11.57	3203	3203	MS2	0/0	0	0	hala.raw
Middle	A	2	IAEAGSR	231	Rejected	Catenin alpha-1 OS=Homo sapiens OX=9606 GN=CTNNA1 PE=1 SV=1 - [CTNA1_HUMAN]	2	0			HCD	0	0	1	3	0.036	0.384	231	242	0.52	0	19	60	67100	2	352.191	703.374	0	0.73	11.73	3241	3241	MS2	0/0	0	0	hala.raw
Middle	A	2	IANETR	357	Rejected	Beta-glucuronidase OS=Homo sapiens OX=9606 GN=GUSB PE=1 SV=2 - [BGLR_HUMAN]	1	1	P08236		HCD		0	2	4	0.038	0.396	231	242	0.52	0	19	60	67100	2	352.191	703.374	0	0.75	11.73	3241	3241	MS2	0/0	0	0	hala.raw
Middle	A	2	LATENR	754	Rejected	Cytoplasmic dynein 2 heavy chain 1 OS=Homo sapiens OX=9606 GN=DYNC2H1 PE=1 SV=4 - [DYHC2_HUMAN]	1	0			HCD		0	3	5	0.038	0.396	231	242	0.52	0	19	60	67100	2	352.191	703.374	0	0.75	11.73	3241	3241	MS2	0/0	0	0	hala.raw
Middle	A	2	IAGEASR	230	Selected	Histone H2B type 1-J OS=Homo sapiens OX=9606 GN=HIST1H2BJ PE=1 SV=3 - [H2B1J_HUMAN]|Histone H2B type 1-K OS=Homo sapiens OX=9606 GN=HIST1H2BK PE=1 SV=3 - [H2B1K_HUMAN]	14	2	P06899;O60814		HCD		0.0192	4	7	0.037	0.387	231	242	0.51	0	19	60	67100	2	352.191	703.374	0	0.73	11.73	3241	3241	MS2	0/0	0	0	hala.raw
Middle	A	2	IASAEGR	757	Rejected	Olfactory receptor 10J4 OS=Homo sapiens OX=9606 GN=OR10J4 PE=3 SV=1 - [O10J4_HUMAN]	1	0			HCD		0.0192	5	8	0.037	0.389	231	242	0.51	0	19	60	67100	2	352.191	703.374	0	0.73	11.73	3241	3241	MS2	0/0	0	0	hala.raw
High	A	2	IAGEASR	230	Unambiguous	Histone H2B type 1-J OS=Homo sapiens OX=9606 GN=HIST1H2BJ PE=1 SV=3 - [H2B1J_HUMAN]|Histone H2B type 1-K OS=Homo sapiens OX=9606 GN=HIST1H2BK PE=1 SV=3 - [H2B1K_HUMAN]	14	2	P06899;O60814		HCD	1	0	1	1	0.004	0.0503	231	242	0.77	0	22	60	56200	2	352.191	703.374	0	1.08	12.23	3373	3373	MS2	0/0	0	0	hala.raw
High	A	2	GTGASGSFK	815	Unambiguous	Histone H1.5 OS=Homo sapiens OX=9606 GN=HIST1H1B PE=1 SV=3 - [H15_HUMAN]|Histone H1.2 OS=Homo sapiens OX=9606 GN=HIST1H1C PE=1 SV=2 - [H12_HUMAN]	6	2	P16401;P16403		HCD	1	0	1	1	0	0.0012	96	102	1.83	0	14	60	863000	2	406.201	811.395	0	0.7	12.43	3422	3422	MS2	0/0	0	0	hala.raw
High	A	2	IAGEASR	230	Unambiguous	Histone H2B type 1-J OS=Homo sapiens OX=9606 GN=HIST1H2BJ PE=1 SV=3 - [H2B1J_HUMAN]|Histone H2B type 1-K OS=Homo sapiens OX=9606 GN=HIST1H2BK PE=1 SV=3 - [H2B1K_HUMAN]	14	2	P06899;O60814		HCD	1	0	1	1	0.008	0.122	234	244	0.76	0	32	60	56500	2	352.191	703.374	0	1.34	12.74	3508	3508	MS2	0/0	0	0	hala.raw
High	A	2	GLQTSQDAR	803	Unambiguous	Calreticulin OS=Homo sapiens OX=9606 GN=CALR PE=1 SV=1 - [CALR_HUMAN]	1	1	P27797		HCD	1	0	1	1	0.003	0.038	192	206	1.12	0	17	60	202000	2	488.247	975.487	0	1.65	12.82	3530	3530	MS2	0/0	0	0	hala.raw
High	A	2	GTGASGSFK	815	Unambiguous	Histone H1.5 OS=Homo sapiens OX=9606 GN=HIST1H1B PE=1 SV=3 - [H15_HUMAN]|Histone H1.2 OS=Homo sapiens OX=9606 GN=HIST1H1C PE=1 SV=2 - [H12_HUMAN]	6	2	P16401;P16403		HCD	1	0	1	1	0.002	0.0318	97	105	1.17	0	29	60	206000	2	406.201	811.396	0	1.3	12.93	3559	3559	MS2	0/0	0	0	hala.raw
High	A	2	LAEQAER	554	Unambiguous	14-3-3 protein beta/alpha OS=Homo sapiens OX=9606 GN=YWHAB PE=1 SV=3 - [1433B_HUMAN]|14-3-3 protein theta OS=Homo sapiens OX=9606 GN=YWHAQ PE=1 SV=1 - [1433T_HUMAN]|14-3-3 protein gamma OS=Homo sapiens OX=9606 GN=YWHAG PE=1 SV=2 - [1433G_HUMAN]|14-3-3 protein epsilon OS=Homo sapiens OX=9606 GN=YWHAE PE=1 SV=1 - [1433E_HUMAN]|14-3-3 protein sigma OS=Homo sapiens OX=9606 GN=SFN PE=1 SV=1 - [1433S_H…	7	7	P31946;P27348;P61981;P62258;P31947;P63104;Q04917		HCD	1	0	1	1	0.006	0.0903	128	128	0.92	0	37	60	112000	2	408.714	816.422	0	0.77	12.93	3560	3560	MS2	0/0	0	0	hala.raw
Middle	A	2	ADHGEPIGR	865	Unambiguous	Heat shock protein HSP 90-beta OS=Homo sapiens OX=9606 GN=HSP90AB1 PE=1 SV=4 - [HS90B_HUMAN]	1	1	P08238		HCD	1	0	1	1	0.038	0.399	138	146	0.7	0	24	60	181000	2	476.237	951.466	0	2.01	13.22	3635	3635	MS2	0/0	0	0	hala.raw
High	A	2	IAGEASR	230	Unambiguous	Histone H2B type 1-J OS=Homo sapiens OX=9606 GN=HIST1H2BJ PE=1 SV=3 - [H2B1J_HUMAN]|Histone H2B type 1-K OS=Homo sapiens OX=9606 GN=HIST1H2BK PE=1 SV=3 - [H2B1K_HUMAN]	14	2	P06899;O60814		HCD	1	0	1	1	0.008	0.125	228	240	0.75	0	28	60	57200	2	352.191	703.374	0	0.56	13.25	3645	3645	MS2	0/0	0	0	hala.raw
High	A	2	GTGASGSFK	815	Unambiguous	Histone H1.5 OS=Homo sapiens OX=9606 GN=HIST1H1B PE=1 SV=3 - [H15_HUMAN]|Histone H1.2 OS=Homo sapiens OX=9606 GN=HIST1H1C PE=1 SV=2 - [H12_HUMAN]	6	2	P16401;P16403		HCD	1	0	1	1	0.007	0.107	97	105	1.03	0	29	60	136000	2	406.201	811.395	0	1.22	13.43	3692	3692	MS2	0/0	0	0	hala.raw
High	A	2	EDAANNYAR	888	Unambiguous	Tubulin alpha-1A chain OS=Homo sapiens OX=9606 GN=TUBA1A PE=1 SV=1 - [TBA1A_HUMAN]|Tubulin alpha-1B chain OS=Homo sapiens OX=9606 GN=TUBA1B PE=1 SV=1 - [TBA1B_HUMAN]|Tubulin alpha-1C chain OS=Homo sapiens OX=9606 GN=TUBA1C PE=1 SV=1 - [TBA1C_HUMAN]|Tubulin alpha-4A chain OS=Homo sapiens OX=9606 GN=TUBA4A PE=1 SV=1 - [TBA4A_HUMAN]|Tubulin alpha-8 chain OS=Homo sapiens OX=9606 GN=TUBA8 PE=1 SV=1 - …	7	3	Q9BQE3;P68366;A6NHL2		HCD	1	0	1	1	0	0.000326	74	86	1.71	0	1	60	784000	2	512.229	1023.45	0	1.4	13.63	3743	3743	MS2	0/0	0	0	hala.raw
Middle	A	2	EDAANNYAR	888	Unambiguous	Tubulin alpha-1A chain OS=Homo sapiens OX=9606 GN=TUBA1A PE=1 SV=1 - [TBA1A_HUMAN]|Tubulin alpha-1B chain OS=Homo sapiens OX=9606 GN=TUBA1B PE=1 SV=1 - [TBA1B_HUMAN]|Tubulin alpha-1C chain OS=Homo sapiens OX=9606 GN=TUBA1C PE=1 SV=1 - [TBA1C_HUMAN]|Tubulin alpha-4A chain OS=Homo sapiens OX=9606 GN=TUBA4A PE=1 SV=1 - [TBA4A_HUMAN]|Tubulin alpha-8 chain OS=Homo sapiens OX=9606 GN=TUBA8 PE=1 SV=1 - …	7	3	Q9BQE3;P68366;A6NHL2		HCD	1	0	1	1	0.048	0.464	70	82	0.52	0	10	60	153000	2	512.229	1023.45	0	0.81	14.13	3889	3889	MS2	0/0	0	0	hala.raw
High	A	2	IAGEASR	230	Unambiguous	Histone H2B type 1-J OS=Homo sapiens OX=9606 GN=HIST1H2BJ PE=1 SV=3 - [H2B1J_HUMAN]|Histone H2B type 1-K OS=Homo sapiens OX=9606 GN=HIST1H2BK PE=1 SV=3 - [H2B1K_HUMAN]	14	2	P06899;O60814		HCD	1	0	1	1	0.008	0.118	232	243	0.73	0	56	60	36000	2	352.191	703.375	0	1.69	16.08	4439	4439	MS2	0/0	0	0	hala.raw
High	A	2	GTNESLER	1037	Unambiguous	Vimentin OS=Homo sapiens OX=9606 GN=VIM PE=1 SV=4 - [VIME_HUMAN]	2	1	P08670		HCD	1	0	1	1	0	0.000649	127	139	1.41	0	5	60	221000	2	453.22	905.432	0	-0.05	16.16	4464	4464	MS2	0/0	0	0	hala.raw
Middle	A	2	TEISEmNR	1002	Unambiguous	Keratin, type II cytoskeletal 8 OS=Homo sapiens OX=9606 GN=KRT8 PE=1 SV=7 - [K2C8_HUMAN]	1	1	P05787	M6(Oxidation)	HCD	1	0	1	1	0.026	0.3	75	68	0.68	0	4	60	418000	2	498.227	995.447	0	0.48	16.42	4537	4537	MS2	0/0	0	0	hala.raw
Middle	A	2	SPEIQR	1067	Selected	60S ribosomal protein L4 OS=Homo sapiens OX=9606 GN=RPL4 PE=1 SV=5 - [RL4_HUMAN]	1	1	P36578		HCD	0	0	1	1	0.027	0.312	84	86	0.76	0	10	60	72900	2	365.199	729.39	0	1.36	16.83	4661	4661	MS2	0/0	0	0	hala.raw
Middle	A	2	SPEQLR	1068	Rejected	N-acetylglucosamine-1-phosphotransferase subunit gamma OS=Homo sapiens OX=9606 GN=GNPTG PE=1 SV=1 - [GNPTG_HUMAN]	1	0			HCD		0	2	2	0.027	0.312	84	86	0.76	0	10	60	72900	2	365.199	729.39	0	1.36	16.83	4661	4661	MS2	0/0	0	0	hala.raw
Middle	A	2	VALDVGR	1189	Unambiguous	DNA polymerase subunit gamma-2, mitochondrial OS=Homo sapiens OX=9606 GN=POLG2 PE=1 SV=1 - [DPOG2_HUMAN]	1	1	Q9UHN1		HCD	1	0	1	1	0.047	0.456	208	196	0.63	0	39	60	79200	2	365.217	729.426	0	0.99	19.62	5522	5522	MS2	0/0	0	0	hala.raw
Middle	A	2	EPEQLR	1193	Unambiguous	Heterogeneous nuclear ribonucleoprotein A1 OS=Homo sapiens OX=9606 GN=HNRNPA1 PE=1 SV=5 - [ROA1_HUMAN]|Heterogeneous nuclear ribonucleoprotein A3 OS=Homo sapiens OX=9606 GN=HNRNPA3 PE=1 SV=2 - [ROA3_HUMAN]	3	2	P09651;P51991		HCD	1	0	1	1	0.012	0.173	103	95	0.76	0	22	60	66300	2	386.203	771.4	0	0.08	19.74	5558	5558	MS2	0/0	0	0	hala.raw
High	A	2	EPEQLR	1193	Unambiguous	Heterogeneous nuclear ribonucleoprotein A1 OS=Homo sapiens OX=9606 GN=HNRNPA1 PE=1 SV=5 - [ROA1_HUMAN]|Heterogeneous nuclear ribonucleoprotein A3 OS=Homo sapiens OX=9606 GN=HNRNPA3 PE=1 SV=2 - [ROA3_HUMAN]	3	2	P09651;P51991		HCD	1	0	1	1	0.005	0.0725	103	95	0.73	0	25	60	94400	2	386.203	771.4	0	0	20.25	5714	5714	MS2	0/0	0	0	hala.raw
Middle	A	2	SGMNVAR	1269	Unambiguous	Pyruvate kinase PKM OS=Homo sapiens OX=9606 GN=PKM PE=1 SV=4 - [KPYM_HUMAN]	1	1	P14618		HCD	1	0	1	1	0.014	0.193	183	198	0.65	0	57	60	79800	2	367.685	734.362	0	1.34	21.33	6071	6071	MS2	0/0	0	0	hala.raw
High	A	2	TDTGEPMGR	1294	Unambiguous	Heat shock protein HSP 90-alpha OS=Homo sapiens OX=9606 GN=HSP90AA1 PE=1 SV=5 - [HS90A_HUMAN]	1	1	P07900		HCD	1	0	1	1	0.009	0.132	29	36	0.68	0	8	60	192000	2	482.214	963.42	0	0.01	21.52	6132	6132	MS2	0/0	0	0	hala.raw
High	A	2	SGMNVAR	1269	Unambiguous	Pyruvate kinase PKM OS=Homo sapiens OX=9606 GN=PKM PE=1 SV=4 - [KPYM_HUMAN]	1	1	P14618		HCD	1	0	1	1	0.001	0.0178	183	198	0.81	0	50	60	85300	2	367.685	734.362	0	0.76	21.84	6238	6238	MS2	0/0	0	0	hala.raw
High	A	2	ScEVPTR	1404	Unambiguous	Complement decay-accelerating factor OS=Homo sapiens OX=9606 GN=CD55 PE=1 SV=4 - [DAF_HUMAN]	1	1	P08174	C2(Carbamidomethyl)	HCD	1	0	1	1	0.005	0.0713	112	119	0.89	0	40	60	72300	2	424.7	848.392	0	-1.37	22.87	6599	6599	MS2	0/0	0	0	hala.raw
Middle	A	2	QASEGPLK	1421	Unambiguous	Glyceraldehyde-3-phosphate dehydrogenase OS=Homo sapiens OX=9606 GN=GAPDH PE=1 SV=3 - [G3P_HUMAN]	1	1	P04406		HCD	1	0	1	1	0.048	0.462	96	111	1.04	0	39	60	289000	2	415.225	829.442	0	1.03	23.05	6663	6663	MS2	0/0	0	0	hala.raw
Middle	A	2	IANETR	357	Selected	Beta-glucuronidase OS=Homo sapiens OX=9606 GN=GUSB PE=1 SV=2 - [BGLR_HUMAN]	1	1	P08236		HCD	0	0	1	7	0.033	0.364	222	232	0.5	0	50	60	38100	2	352.19	703.373	0	-0.12	23.53	6860	6860	MS2	0/0	0	0	hala.raw
Middle	A	2	IAEAGSR	231	Rejected	Catenin alpha-1 OS=Homo sapiens OX=9606 GN=CTNNA1 PE=1 SV=1 - [CTNA1_HUMAN]	2	0			HCD		0	2	8	0.032	0.353	222	232	0.5	0	50	60	38100	2	352.19	703.373	0	-0.13	23.53	6860	6860	MS2	0/0	0	0	hala.raw
Middle	A	2	LATENR	754	Rejected	Cytoplasmic dynein 2 heavy chain 1 OS=Homo sapiens OX=9606 GN=DYNC2H1 PE=1 SV=4 - [DYHC2_HUMAN]	1	0			HCD		0	3	9	0.033	0.364	222	232	0.5	0	50	60	38100	2	352.19	703.373	0	-0.12	23.53	6860	6860	MS2	0/0	0	0	hala.raw
Middle	A	2	NGHVFR	1122	Unambiguous	Rho guanine nucleotide exchange factor 28 OS=Homo sapiens OX=9606 GN=ARHGEF28 PE=1 SV=3 - [ARG28_HUMAN]	1	1	Q8N1W1		HCD	1	0	1	4	0.045	0.439	47	52	0.45	0	53	60	30100	2	365.193	729.379	0	0.45	23.55	6867	6867	MS2	0/0	0	0	hala.raw
Middle	A	2	ETmQSLNDR	1322	Unambiguous	Keratin, type I cytoskeletal 18 OS=Homo sapiens OX=9606 GN=KRT18 PE=1 SV=2 - [K1C18_HUMAN]	2	1	P05783	M3(Oxidation)	HCD	1	0	1	1	0.016	0.206	69	65	0.72	0	0	60	131000	2	555.248	1109.49	0	-0.47	23.56	6870	6870	MS2	0/0	0	0	hala.raw
Middle	A	2	GPPPSYGGSSR	1388	Unambiguous	RNA-binding motif protein, X chromosome OS=Homo sapiens OX=9606 GN=RBMX PE=1 SV=3 - [RBMX_HUMAN]	2	1	P38159		HCD	1	0	1	1	0.014	0.193	124	139	0.55	0	18	60	274000	2	531.255	1061.5	0	0.74	23.65	6912	6912	MS2	0/0	0	0	hala.raw
Middle	A	2	GTLVQTK	1510	Unambiguous	Histone H1.5 OS=Homo sapiens OX=9606 GN=HIST1H1B PE=1 SV=3 - [H15_HUMAN]|Histone H1.2 OS=Homo sapiens OX=9606 GN=HIST1H1C PE=1 SV=2 - [H12_HUMAN]	5	2	P16401;P16403		HCD	1	0	1	2	0.013	0.18	214	194	0.82	0	40	60	328000	2	373.724	746.441	0	0.26	23.68	6926	6926	MS2	0/0	0	0	hala.raw
High	A	2	QASEGPLK	1421	Unambiguous	Glyceraldehyde-3-phosphate dehydrogenase OS=Homo sapiens OX=9606 GN=GAPDH PE=1 SV=3 - [G3P_HUMAN]	1	1	P04406		HCD	1	0	1	1	0.004	0.0565	96	111	1.34	0	41	60	329000	2	415.225	829.442	0	1.11	23.78	6975	6975	MS2	0/0	0	0	hala.raw
High	A	2	VQQSSESSTSSPSQHEATPGAR	1592	Unambiguous	Zinc finger CCCH domain-containing protein 11B OS=Homo sapiens OX=9606 GN=ZC3H11B PE=4 SV=1 - [ZC11B_HUMAN]	2	1	A0A1B0GTU1		HCD	1	0	1	1	0.002	0.0336	92	108	0.67	0	30	60	136000	3	753.347	2258.03	0	-0.08	23.97	7071	7071	MS2	0/0	0	0	hala.raw
Middle	A	2	IAGEASR	230	Unambiguous	Histone H2B type 1-J OS=Homo sapiens OX=9606 GN=HIST1H2BJ PE=1 SV=3 - [H2B1J_HUMAN]|Histone H2B type 1-K OS=Homo sapiens OX=9606 GN=HIST1H2BK PE=1 SV=3 - [H2B1K_HUMAN]	14	2	P06899;O60814		HCD	1	0	1	1	0.011	0.156	222	232	0.69	0	40	60	40200	2	352.19	703.373	0	-0.48	24.05	7111	7111	MS2	0/0	0	0	hala.raw
Middle	A	2	YAEAVTR	1535	Unambiguous	Phosphoglycerate kinase 1 OS=Homo sapiens OX=9606 GN=PGK1 PE=1 SV=3 - [PGK1_HUMAN]	1	1	P00558		HCD	1	0	1	1	0.012	0.173	160	163	1.09	0	9	60	289000	2	405.209	809.412	0	-4.31	24.29	7228	7228	MS2	0/0	0	0	hala.raw
High	A	2	QASEGPLK	1421	Unambiguous	Glyceraldehyde-3-phosphate dehydrogenase OS=Homo sapiens OX=9606 GN=GAPDH PE=1 SV=3 - [G3P_HUMAN]	1	1	P04406		HCD	1	0	1	1	0.002	0.0239	87	104	1.31	0	44	60	301000	2	415.224	829.441	0	-1.03	24.31	7239	7239	MS2	0/0	0	0	hala.raw
Middle	A	2	DEQTcLMWAYEK	1722	Unambiguous	Serine/threonine-protein kinase TNNI3K OS=Homo sapiens OX=9606 GN=TNNI3K PE=1 SV=3 - [TNI3K_HUMAN]	1	1	Q59H18	C5(Carbamidomethyl)	HCD	1	0	1	1	0.035	0.371	37	32	0.48	0	68	60	121000	2	787.337	1573.67	0	0.76	24.32	7246	7246	MS2	0/0	0	0	hala.raw
High	A	2	VELESR	1735	Unambiguous	Keratin, type II cytoskeletal 8 OS=Homo sapiens OX=9606 GN=KRT8 PE=1 SV=7 - [K2C8_HUMAN]	1	1	P05787		HCD	1	0	1	1	0.001	0.0137	266	278	1.35	0	27	60	130000	2	366.697	732.388	0	-1.61	24.35	7260	7260	MS2	0/0	0	0	hala.raw
High	A	2	VGEEDDGEYR	1749	Unambiguous	Neural cell adhesion molecule L1 OS=Homo sapiens OX=9606 GN=L1CAM PE=1 SV=2 - [L1CAM_HUMAN]	1	1	P32004		HCD	1	0	1	1	0	6.51e-05	18	20	1.93	0	45	60	1380000	2	584.74	1168.47	0	-1.42	24.37	7271	7271	MS2	0/0	0	0	hala.raw
High	A	2	GVPAGNSDTEGGQPGR	1791	Unambiguous	Apoptotic chromatin condensation inducer in the nucleus OS=Homo sapiens OX=9606 GN=ACIN1 PE=1 SV=2 - [ACINU_HUMAN]	1	1	Q9UKV3		HCD	1	0	1	1	0.007	0.108	101	85	0.48	0	26	60	351000	2	749.846	1498.69	0	-1.88	24.47	7319	7319	MS2	0/0	0	0	hala.raw
High	A	2	EFDEDSEDR	1793	Unambiguous	Septin-9 OS=Homo sapiens OX=9606 GN=SEPT9 PE=1 SV=2 - [SEPT9_HUMAN]	1	1	Q9UHD8		HCD	1	0	1	1	0	0.00671	4	5	1.31	0	21	60	281000	2	571.217	1141.43	0	-1.53	24.47	7320	7320	MS2	0/0	0	0	hala.raw
Middle	A	2	DPNTQSVGNPQR	1795	Unambiguous	GTPase Era, mitochondrial OS=Homo sapiens OX=9606 GN=ERAL1 PE=1 SV=2 - [ERAL1_HUMAN]	1	1	O75616		HCD	1	0	1	1	0.027	0.313	102	102	0.71	0	11	60	97900	2	656.814	1312.62	0	-2.98	24.47	7322	7322	MS2	0/0	0	0	hala.raw
High	A	2	QVHPDTGISSK	1802	Unambiguous	Histone H2B type 1-J OS=Homo sapiens OX=9606 GN=HIST1H2BJ PE=1 SV=3 - [H2B1J_HUMAN]|Histone H2B type 1-K OS=Homo sapiens OX=9606 GN=HIST1H2BK PE=1 SV=3 - [H2B1K_HUMAN]	15	2	P06899;O60814		HCD	1	0	1	1	0	0.0016	182	171	1.85	0	11	60	1580000	3	390.203	1168.59	0	-1.94	24.49	7334	7334	MS2	0/0	0	0	hala.raw
High	A	2	QVHPDTGISSK	1802	Unambiguous	Histone H2B type 1-J OS=Homo sapiens OX=9606 GN=HIST1H2BJ PE=1 SV=3 - [H2B1J_HUMAN]|Histone H2B type 1-K OS=Homo sapiens OX=9606 GN=HIST1H2BK PE=1 SV=3 - [H2B1K_HUMAN]	15	2	P06899;O60814		HCD	1	0	1	1	0	0.000418	153	143	1.88	0	51	60	1480000	2	584.801	1168.59	0	-1.33	24.52	7350	7350	MS2	0/0	0	0	hala.raw
High	A	2	NQGGYGGSSSSSSYGSGR	1600	Unambiguous	Heterogeneous nuclear ribonucleoprotein A1 OS=Homo sapiens OX=9606 GN=HNRNPA1 PE=1 SV=5 - [ROA1_HUMAN]	1	1	P09651		HCD	1	0	1	1	0	1.74e-11	13	9	3.7	0	0	21	17400000	2	847.852	1694.7	0	-2.03	24.55	7363	7363	MS2	0/0	0	0	hala.raw
Middle	A	2	YAAPEQNNDPQQSK	1853	Unambiguous	WD repeat-containing protein 36 OS=Homo sapiens OX=9606 GN=WDR36 PE=1 SV=1 - [WDR36_HUMAN]	1	1	Q8NI36		HCD	1	0	1	1	0.038	0.397	84	63	0.63	0	8	60	707000	2	795.363	1589.72	0	-0.18	24.57	7377	7377	MS2	0/0	0	0	hala.raw
Middle	A	2	RHATAEEVEEEERDR	1855	Unambiguous	Ribosome biogenesis protein BRX1 homolog OS=Homo sapiens OX=9606 GN=BRIX1 PE=1 SV=2 - [BRX1_HUMAN]	1	1	Q8TDN6		HCD	1	0	1	1	0.019	0.235	116	97	1.3	2	33	60	433000	4	464.718	1855.85	0	-1.49	24.58	7378	7378	MS2	0/0	0	0	hala.raw
High	A	2	YHTINGHNAEVR	1857	Unambiguous	Heterogeneous nuclear ribonucleoproteins A2/B1 OS=Homo sapiens OX=9606 GN=HNRNPA2B1 PE=1 SV=2 - [ROA2_HUMAN]	1	1	P22626		HCD	1	0	1	1	0.005	0.0794	140	142	0.89	0	12	60	293000	3	470.9	1410.69	0	-0.37	24.58	7379	7379	MS2	0/0	0	0	hala.raw
Middle	A	2	ETmQSLNDR	1322	Unambiguous	Keratin, type I cytoskeletal 18 OS=Homo sapiens OX=9606 GN=KRT18 PE=1 SV=2 - [K1C18_HUMAN]	2	1	P05783	M3(Oxidation)	HCD	1	0	1	1	0.012	0.168	69	65	0.72	0	45	60	131000	2	555.248	1109.49	0	-0.47	24.59	7387	7387	MS2	0/0	0	0	hala.raw
Middle	A	2	LEcFALGNPIPQINWR	1869	Unambiguous	Contactin-3 OS=Homo sapiens OX=9606 GN=CNTN3 PE=1 SV=3 - [CNTN3_HUMAN]	1	1	Q9P232	C3(Carbamidomethyl)	HCD	1	0	1	1	0.044	0.436	198	208	0.52	0	45	60	178000	4	482.755	1928	0	5.99	24.61	7395	7395	MS2	0/0	0	0	hala.raw
High	A	2	YcDPDSYHR	1887	Unambiguous	Splicing factor U2AF 65 kDa subunit OS=Homo sapiens OX=9606 GN=U2AF2 PE=1 SV=4 - [U2AF2_HUMAN]	1	1	P26368	C2(Carbamidomethyl)	HCD	1	0	1	1	0	0.0084	11	8	1.26	0	27	60	463000	3	404.829	1212.47	0	-0.01	24.65	7418	7418	MS2	0/0	0	0	hala.raw
High	A	2	TPPSEEDSAEAER	1900	Unambiguous	Small glutamine-rich tetratricopeptide repeat-containing protein alpha OS=Homo sapiens OX=9606 GN=SGTA PE=1 SV=1 - [SGTA_HUMAN]	1	1	O43765		HCD	1	0	1	1	0	0.000181	29	28	1.45	0	11	60	966000	2	709.306	1417.61	0	-1.63	24.68	7435	7435	MS2	0/0	0	0	hala.raw
High	A	2	GTLVQTK	1510	Unambiguous	Histone H1.5 OS=Homo sapiens OX=9606 GN=HIST1H1B PE=1 SV=3 - [H15_HUMAN]|Histone H1.2 OS=Homo sapiens OX=9606 GN=HIST1H1C PE=1 SV=2 - [H12_HUMAN]	5	2	P16401;P16403		HCD	1	0	1	1	0.004	0.0578	203	185	0.97	0	65	60	166000	2	373.724	746.44	0	-0.56	24.69	7438	7438	MS2	0/0	0	0	hala.raw
High	A	2	LQQQQRPEDAEDGAEGGGK	1934	Unambiguous	tRNA (cytosine(34)-C(5))-methyltransferase OS=Homo sapiens OX=9606 GN=NSUN2 PE=1 SV=2 - [NSUN2_HUMAN]	1	1	Q08J23		HCD	1	0	1	1	0	0.000193	105	110	1.75	0	36	60	1280000	3	671.646	2012.92	0	-1.36	24.74	7461	7461	MS2	0/0	0	0	hala.raw
High	A	2	ATcAPQHGAPGPGPADASK	1942	Unambiguous	Filamin-A OS=Homo sapiens OX=9606 GN=FLNA PE=1 SV=4 - [FLNA_HUMAN]	1	1	P21333	C3(Carbamidomethyl)	HCD	1	0	1	1	0.004	0.058	118	117	0.72	0	32	60	292000	3	597.28	1789.83	0	-1.06	24.75	7466	7466	MS2	0/0	0	0	hala.raw
High	A	2	EGIPPDQQR	1944	Unambiguous	Ubiquitin-40S ribosomal protein S27a OS=Homo sapiens OX=9606 GN=RPS27A PE=1 SV=2 - [RS27A_HUMAN]	4	1	P62979		HCD	1	0	1	1	0.002	0.0294	164	166	1.58	0	40	60	2820000	2	520.262	1039.52	0	-0.22	24.75	7467	7467	MS2	0/0	0	0	hala.raw
High	A	2	EGIPPQQQR	1947	Unambiguous	NEDD8 OS=Homo sapiens OX=9606 GN=NEDD8 PE=1 SV=1 - [NEDD8_HUMAN]	1	1	Q15843		HCD	1	0	1	1	0.003	0.0378	152	153	0.95	0	47	60	307000	2	526.778	1052.55	0	-0.34	24.75	7470	7470	MS2	0/0	0	0	hala.raw
High	A	2	cDSSPDSAEDVR	1957	Unambiguous	Alpha-2-HS-glycoprotein OS=Homo sapiens OX=9606 GN=AHSG PE=1 SV=2 - [FETUA_HUMAN]	1	1	P02765	C1(Carbamidomethyl)	HCD	1	0	1	1	0	1.92e-06	11	9	2.48	0	5	60	2590000	2	669.267	1337.53	0	-0.51	24.78	7483	7483	MS2	0/0	0	0	hala.raw
High	A	2	EISDDEAEEEK	1959	Unambiguous	Heat shock protein HSP 90-beta OS=Homo sapiens OX=9606 GN=HSP90AB1 PE=1 SV=4 - [HS90B_HUMAN]	2	1	P08238		HCD	1	0	1	1	0	3.12e-05	21	19	1.79	0	7	60	1290000	2	647.269	1293.53	0	-1.36	24.78	7484	7484	MS2	0/0	0	0	hala.raw
High	A	2	cEMEQQNQEYK	2005	Unambiguous	Keratin, type I cytoskeletal 17 OS=Homo sapiens OX=9606 GN=KRT17 PE=1 SV=2 - [K1C17_HUMAN]	2	1	Q04695	C1(Carbamidomethyl)	HCD	1	0	1	1	0	7.41e-06	11	20	2.76	0	3	60	4560000	2	743.799	1486.59	0	-1.53	24.86	7526	7526	MS2	0/0	0	0	hala.raw
High	A	2	DSYVGDEAQSK	2007	Unambiguous	Actin, alpha cardiac muscle 1 OS=Homo sapiens OX=9606 GN=ACTC1 PE=1 SV=1 - [ACTC_HUMAN]|Actin, cytoplasmic 1 OS=Homo sapiens OX=9606 GN=ACTB PE=1 SV=1 - [ACTB_HUMAN]	6	2	P68032;P60709		HCD	1	0	1	1	0	0.000179	53	54	1.75	0	1	60	2410000	2	599.764	1198.52	0	-1.13	24.86	7527	7527	MS2	0/0	0	0	hala.raw
High	A	2	SDAEEDGGTVSQEEEDRKPK	2013	Unambiguous	Calnexin OS=Homo sapiens OX=9606 GN=CANX PE=1 SV=2 - [CALX_HUMAN]	1	1	P27824		HCD	1	0	1	1	0.008	0.108	74	75	1.63	1	7	60	444000	3	735.999	2205.98	0	4.05	24.87	7532	7532	MS2	0/0	0	0	hala.raw
High	A	2	NYQQNYQNSESGEK	2027	Unambiguous	Nuclease-sensitive element-binding protein 1 OS=Homo sapiens OX=9606 GN=YBX1 PE=1 SV=3 - [YBOX1_HUMAN]	1	1	P67809		HCD	1	0	1	1	0	6.95e-07	27	34	2.66	0	3	60	3490000	2	844.86	1688.71	0	-1.7	24.89	7543	7543	MS2	0/0	0	0	hala.raw
Middle	A	2	ISSPTETER	2034	Unambiguous	Protein S100-A11 OS=Homo sapiens OX=9606 GN=S100A11 PE=1 SV=2 - [S10AB_HUMAN]	1	1	P31949		HCD	1	0	1	1	0.015	0.201	170	178	0.99	0	28	60	429000	2	510.253	1019.5	0	-1.8	24.9	7549	7549	MS2	0/0	0	0	hala.raw
High	A	2	DGETPDPEDPSRK	2036	Unambiguous	Leukotriene A-4 hydrolase OS=Homo sapiens OX=9606 GN=LTA4H PE=1 SV=2 - [LKHA4_HUMAN]	1	1	P09960		HCD	1	0	1	1	0.007	0.101	50	52	1.5	1	14	60	1190000	3	481.55	1442.64	0	-1.93	24.9	7550	7550	MS2	0/0	0	0	hala.raw
High	A	2	DAVTYTEHAK	2055	Unambiguous	Histone H4 OS=Homo sapiens OX=9606 GN=HIST1H4A PE=1 SV=2 - [H4_HUMAN]	1	1	P62805		HCD	1	0	1	1	0.001	0.0181	149	144	1.21	0	22	60	303000	3	378.851	1134.54	0	-3.07	24.94	7568	7568	MS2	0/0	0	0	hala.raw
High	A	2	TAELAEADAR	2063	Unambiguous	Centrosomal protein of 290 kDa OS=Homo sapiens OX=9606 GN=CEP290 PE=1 SV=2 - [CE290_HUMAN]	1	1	O15078		HCD	1	0	1	1	0.006	0.0833	135	120	1.3	0	52	60	245000	2	523.759	1046.51	0	-0.41	24.94	7573	7573	MS2	0/0	0	0	hala.raw
Middle	A	2	DYSDHPSGGSYR	1780	Unambiguous	RNA-binding motif protein, X chromosome OS=Homo sapiens OX=9606 GN=RBMX PE=1 SV=3 - [RBMX_HUMAN]	2	1	P38159		HCD	1	0	1	1	0.03	0.33	21	17	0.89	0	54	60	1310000	3	447.52	1340.55	0	-3.31	24.96	7582	7582	MS2	0/0	0	0	hala.raw
High	A	2	ENQQATSGPNQPSVR	2078	Unambiguous	Y-box-binding protein 3 OS=Homo sapiens OX=9606 GN=YBX3 PE=1 SV=4 - [YBOX3_HUMAN]	1	1	P16989		HCD	1	0	1	1	0	0.0027	130	130	1.73	0	23	60	1070000	2	806.885	1612.76	0	-3.45	24.97	7586	7586	MS2	0/0	0	0	hala.raw
High	A	2	GDAcDDDIDGDR	2088	Unambiguous	Cartilage oligomeric matrix protein OS=Homo sapiens OX=9606 GN=COMP PE=1 SV=2 - [COMP_HUMAN]	1	1	P49747	C4(Carbamidomethyl)	HCD	1	0	1	1	0.001	0.0185	2	1	0.84	0	8	60	439000	2	662.241	1323.48	0	-0.04	24.98	7591	7591	MS2	0/0	0	0	hala.raw
Middle	A	2	DTDSEEEIR	2108	Unambiguous	Calmodulin-1 OS=Homo sapiens OX=9606 GN=CALM1 PE=1 SV=1 - [CALM1_HUMAN]	1	1	P0DP23		HCD	1	0	1	1	0.029	0.329	23	30	0.82	0	37	60	214000	2	547.234	1093.46	0	-3.05	25	7602	7602	MS2	0/0	0	0	hala.raw
High	A	2	EEDEEPESPPEK	2128	Unambiguous	Nuclear ubiquitous casein and cyclin-dependent kinase substrate 1 OS=Homo sapiens OX=9606 GN=NUCKS1 PE=1 SV=1 - [NUCKS_HUMAN]	1	1	Q9H1E3		HCD	1	0	1	1	0.001	0.0197	21	21	1.38	0	25	60	1180000	2	707.794	1414.58	0	-2.91	25.02	7614	7614	MS2	0/0	0	0	hala.raw
Middle	A	2	QVHPDTGISSK	1802	Unambiguous	Histone H2B type 1-J OS=Homo sapiens OX=9606 GN=HIST1H2BJ PE=1 SV=3 - [H2B1J_HUMAN]|Histone H2B type 1-K OS=Homo sapiens OX=9606 GN=HIST1H2BK PE=1 SV=3 - [H2B1K_HUMAN]	15	2	P06899;O60814		HCD	1	0	1	1	0.012	0.161	152	142	1.1	0	15	60	915000	3	390.203	1168.59	0	-1.63	25.03	7620	7620	MS2	0/0	0	0	hala.raw
Middle	A	2	EVcSEQAETGPcR	2149	Unambiguous	Amyloid-beta A4 protein OS=Homo sapiens OX=9606 GN=APP PE=1 SV=3 - [A4_HUMAN]	1	1	P05067	C3(Carbamidomethyl); C12(Carbamidomethyl)	HCD	1	0	1	1	0.025	0.28	14	14	0.61	0	43	60	336000	2	761.814	1522.62	0	-2.96	25.05	7628	7628	MS2	0/0	0	0	hala.raw
High	A	2	NQGGYGGSSSSSSYGSGR	1600	Unambiguous	Heterogeneous nuclear ribonucleoprotein A1 OS=Homo sapiens OX=9606 GN=HNRNPA1 PE=1 SV=5 - [ROA1_HUMAN]	1	1	P09651		HCD	1	0	1	1	0	1.89e-11	11	8	3.71	0	1	16	20700000	2	847.851	1694.69	0	-3.4	25.05	7630	7630	MS2	0/0	0	0	hala.raw
High	A	2	SYSEDDIHR	2153	Unambiguous	YTH domain-containing family protein 1 OS=Homo sapiens OX=9606 GN=YTHDF1 PE=1 SV=1 - [YTHD1_HUMAN]	3	1	Q9BYJ9		HCD	1	0	1	1	0	0.000702	42	51	1.46	0	0	60	1260000	2	561.245	1121.48	0	-1.9	25.06	7631	7631	MS2	0/0	0	0	hala.raw
High	A	2	HATAEEVEEEER	2155	Unambiguous	Ribosome biogenesis protein BRX1 homolog OS=Homo sapiens OX=9606 GN=BRIX1 PE=1 SV=2 - [BRX1_HUMAN]	1	1	Q8TDN6		HCD	1	0	1	1	0.008	0.121	47	56	0.62	0	60	60	815000	2	714.813	1428.62	0	-3.24	25.06	7633	7633	MS2	0/0	0	0	hala.raw
High	A	2	SYSEDDIHR	2153	Unambiguous	YTH domain-containing family protein 1 OS=Homo sapiens OX=9606 GN=YTHDF1 PE=1 SV=1 - [YTHD1_HUMAN]	3	1	Q9BYJ9		HCD	1	0	1	1	0.002	0.0281	41	49	1.25	0	21	60	662000	3	374.499	1121.48	0	-3.03	25.06	7634	7634	MS2	0/0	0	0	hala.raw
High	A	2	IEGDETSTEAATR	2163	Unambiguous	DNA-directed RNA polymerases I, II, and III subunit RPABC3 OS=Homo sapiens OX=9606 GN=POLR2H PE=1 SV=4 - [RPAB3_HUMAN]	1	1	P52434		HCD	1	0	1	1	0	3.1e-05	87	102	1.7	0	0	60	698000	2	690.318	1379.63	0	-0.33	25.07	7637	7637	MS2	0/0	0	0	hala.raw
High	A	2	QQGTSVAQSGAQAPGR	2178	Unambiguous	Replication initiator 1 OS=Homo sapiens OX=9606 GN=REPIN1 PE=1 SV=1 - [REPI1_HUMAN]	1	1	Q9BWE0		HCD	1	0	1	1	0	0.000534	144	134	1.43	0	10	60	590000	2	771.88	1542.75	0	-5.92	25.09	7649	7649	MS2	0/0	0	0	hala.raw
Middle	A	2	AQAVSEEEEEEEGK	2186	Unambiguous	ATP-dependent RNA helicase DDX24 OS=Homo sapiens OX=9606 GN=DDX24 PE=1 SV=1 - [DDX24_HUMAN]	1	1	Q9GZR7		HCD	1	0	1	1	0.011	0.157	39	37	0.83	0	0	60	457000	2	782.334	1563.66	0	-3.7	25.1	7653	7653	MS2	0/0	0	0	hala.raw
Middle	A	2	DADAGDEDEESEEPR	2207	Unambiguous	Opioid growth factor receptor OS=Homo sapiens OX=9606 GN=OGFR PE=1 SV=3 - [OGFR_HUMAN]	1	1	Q9NZT2		HCD	1	0	1	1	0.021	0.246	3	6	1.01	0	0	60	433000	2	832.311	1663.62	0	-2.93	25.13	7666	7666	MS2	0/0	0	0	hala.raw
High	A	2	VGEEDDGEYR	1749	Unambiguous	Neural cell adhesion molecule L1 OS=Homo sapiens OX=9606 GN=L1CAM PE=1 SV=2 - [L1CAM_HUMAN]	1	1	P32004		HCD	1	0	1	1	0	0.00712	21	22	1.07	0	52	60	710000	2	584.742	1168.48	0	1.92	25.13	7669	7669	MS2	0/0	0	0	hala.raw
High	A	2	EGIPPQQQR	1947	Unambiguous	NEDD8 OS=Homo sapiens OX=9606 GN=NEDD8 PE=1 SV=1 - [NEDD8_HUMAN]	1	1	Q15843		HCD	1	0	1	1	0.004	0.0591	174	172	1.2	0	33	60	538000	2	526.778	1052.55	0	0.93	25.15	7677	7677	MS2	0/0	0	0	hala.raw
High	A	2	LESENDEYER	2232	Unambiguous	Pre-mRNA-processing factor 6 OS=Homo sapiens OX=9606 GN=PRPF6 PE=1 SV=1 - [PRP6_HUMAN]	1	1	O94906		HCD	1	0	1	1	0	0.00297	29	31	1.1	0	37	60	1180000	2	642.275	1283.54	0	2.82	25.15	7679	7679	MS2	0/0	0	0	hala.raw
High	A	2	QVHPDTGISSK	1802	Unambiguous	Histone H2B type 1-J OS=Homo sapiens OX=9606 GN=HIST1H2BJ PE=1 SV=3 - [H2B1J_HUMAN]|Histone H2B type 1-K OS=Homo sapiens OX=9606 GN=HIST1H2BK PE=1 SV=3 - [H2B1K_HUMAN]	15	2	P06899;O60814		HCD	1	0	1	1	0.001	0.0203	156	150	1.39	0	56	60	487000	2	584.798	1168.59	0	-5.2	25.15	7681	7681	MS2	0/0	0	0	hala.raw
High	A	2	YcDPDSYHR	1887	Unambiguous	Splicing factor U2AF 65 kDa subunit OS=Homo sapiens OX=9606 GN=U2AF2 PE=1 SV=4 - [U2AF2_HUMAN]	1	1	P26368	C2(Carbamidomethyl)	HCD	1	0	1	1	0.003	0.0385	11	8	1.28	0	24	60	872000	3	404.828	1212.47	0	-2.88	25.16	7683	7683	MS2	0/0	0	0	hala.raw
Middle	A	2	DPAAGHTEESMTDDK	2267	Unambiguous	Proliferation marker protein Ki-67 OS=Homo sapiens OX=9606 GN=MKI67 PE=1 SV=2 - [KI67_HUMAN]	1	1	P46013		HCD	1	0	1	1	0.02	0.245	15	14	0.69	0	20	60	487000	2	802.327	1603.65	0	-4.29	25.19	7700	7700	MS2	0/0	0	0	hala.raw
High	A	2	NKYEDEINKR	2277	Unambiguous	Keratin, type II cytoskeletal 8 OS=Homo sapiens OX=9606 GN=KRT8 PE=1 SV=7 - [K2C8_HUMAN]|Keratin, type II cytoskeletal 6A OS=Homo sapiens OX=9606 GN=KRT6A PE=1 SV=3 - [K2C6A_HUMAN]	6	1	P05787		HCD	1	0	1	1	0.001	0.0217	199	217	1.84	2	12	60	1130000	3	436.889	1308.65	0	-1.68	25.21	7710	7710	MS2	0/0	0	0	hala.raw
High	A	2	QQIcNQQPPcSR	2287	Unambiguous	Zinc finger CCCH-type antiviral protein 1 OS=Homo sapiens OX=9606 GN=ZC3HAV1 PE=1 SV=3 - [ZCCHV_HUMAN]	1	1	Q7Z2W4	C4(Carbamidomethyl); C10(Carbamidomethyl)	HCD	1	0	1	1	0.001	0.0143	68	66	1.09	0	14	60	1040000	2	758.34	1515.67	0	-4.13	25.23	7718	7718	MS2	0/0	0	0	hala.raw
Middle	A	2	FLQEQNK	2289	Rejected	Ubiquitin carboxyl-terminal hydrolase 17-like protein 3 OS=Homo sapiens OX=9606 GN=USP17L3 PE=3 SV=1 - [U17L3_HUMAN]	15	0			HCD	0.0404	0	1	1	0.021	0.249	212	229	0.99	0	10	60	569000	2	453.737	906.467	0	-0.73	25.23	7719	7719	MS2	0/0	0	0	hala.raw
Middle	A	2	FLEQQNK	2290	Selected	Vimentin OS=Homo sapiens OX=9606 GN=VIM PE=1 SV=4 - [VIME_HUMAN]|Keratin, type II cytoskeletal 79 OS=Homo sapiens OX=9606 GN=KRT79 PE=1 SV=2 - [K2C79_HUMAN]|Keratin, type II cytoskeletal 8 OS=Homo sapiens OX=9606 GN=KRT8 PE=1 SV=7 - [K2C8_HUMAN]|Keratin, type II cytoskeletal 6A OS=Homo sapiens OX=9606 GN=KRT6A PE=1 SV=3 - [K2C6A_HUMAN]|Keratin, type II cytoskeletal 7 OS=Homo sapiens OX=9606 GN=KR…	18	3	P08670;P05787;P08729		HCD		0.0404	2	2	0.023	0.264	212	229	0.95	0	10	60	569000	2	453.737	906.467	0	-0.73	25.23	7719	7719	MS2	0/0	0	0	hala.raw
Middle	A	2	EAEDDDTGPEEGSPPK	2293	Unambiguous	Trans-Golgi network integral membrane protein 2 OS=Homo sapiens OX=9606 GN=TGOLN2 PE=1 SV=3 - [TGON2_HUMAN]	1	1	O43493		HCD	1	0	1	1	0.027	0.304	9	10	0.85	0	0	60	325000	2	836.841	1672.67	0	-4.65	25.23	7721	7721	MS2	0/0	0	0	hala.raw
High	A	2	EVVEEAENGR	2307	Unambiguous	Prothymosin alpha OS=Homo sapiens OX=9606 GN=PTMA PE=1 SV=2 - [PTMA_HUMAN]	1	1	P06454		HCD	1	0	1	1	0	4.63e-05	79	87	2.56	0	2	10	40200000	2	566.266	1131.53	0	-1.8	25.25	7728	7728	MS2	0/0	0	0	hala.raw
High	A	2	EGIPPDQQR	1944	Unambiguous	Ubiquitin-40S ribosomal protein S27a OS=Homo sapiens OX=9606 GN=RPS27A PE=1 SV=2 - [RS27A_HUMAN]	4	1	P62979		HCD	1	0	1	1	0	0.0101	189	185	1.96	0	19	37	7000000	2	520.261	1039.51	0	-1.74	25.26	7731	7731	MS2	0/0	0	0	hala.raw
High	A	2	LQQQQRPEDAEDGAEGGGK	1934	Unambiguous	tRNA (cytosine(34)-C(5))-methyltransferase OS=Homo sapiens OX=9606 GN=NSUN2 PE=1 SV=2 - [NSUN2_HUMAN]	1	1	Q08J23		HCD	1	0	1	1	0	1.69e-05	100	107	2.78	0	19	60	2380000	3	671.646	2012.92	0	-2.18	25.26	7734	7734	MS2	0/0	0	0	hala.raw
High	A	2	QEEENPAEETGEEK	2324	Unambiguous	Alpha-endosulfine OS=Homo sapiens OX=9606 GN=ENSA PE=1 SV=1 - [ENSA_HUMAN]	1	1	O43768		HCD	1	0	1	1	0.001	0.0187	24	15	1.37	0	10	60	926000	2	809.837	1618.67	0	-2.72	25.27	7737	7737	MS2	0/0	0	0	hala.raw
High	A	2	LTNSmMMHGR	2331	Unambiguous	40S ribosomal protein S5 OS=Homo sapiens OX=9606 GN=RPS5 PE=1 SV=4 - [RS5_HUMAN]	1	1	P46782	M5(Oxidation)	HCD	1	0	1	2	0.009	0.131	54	51	0.37	0	59	60	265000	3	398.511	1193.52	0	-2.17	25.27	7740	7740	MS2	0/0	0	0	hala.raw
High	A	2	NEENTEPGAESSENADDPNK	2042	Unambiguous	Matrin-3 OS=Homo sapiens OX=9606 GN=MATR3 PE=1 SV=2 - [MATR3_HUMAN]	1	1	P43243		HCD	1	0	1	1	0.007	0.104	16	11	0.79	0	0	60	761000	2	1073.94	2146.86	0	-0.74	25.28	7745	7745	MS2	0/0	0	0	hala.raw
High	A	2	FQRPGDPQSAQDK	2265	Unambiguous	Splicing factor 1 OS=Homo sapiens OX=9606 GN=SF1 PE=1 SV=4 - [SF01_HUMAN]	1	1	Q15637		HCD	1	0	1	1	0	0.000117	146	142	2.05	0	5	60	2430000	2	737.356	1473.7	0	-2.22	25.29	7749	7749	MS2	0/0	0	0	hala.raw
High	A	2	AVTEQGHELSNEER	2348	Unambiguous	14-3-3 protein beta/alpha OS=Homo sapiens OX=9606 GN=YWHAB PE=1 SV=3 - [1433B_HUMAN]	1	1	P31946		HCD	1	0	1	1	0	7.45e-06	122	135	2.68	0	14	60	1700000	3	533.584	1598.74	0	-1.87	25.29	7750	7750	MS2	0/0	0	0	hala.raw
High	A	2	IDGATQSSPAEPK	2350	Unambiguous	Leucine-rich repeat flightless-interacting protein 1 OS=Homo sapiens OX=9606 GN=LRRFIP1 PE=1 SV=2 - [LRRF1_HUMAN]	1	1	Q32MZ4		HCD	1	0	1	1	0.003	0.0377	120	116	1.34	0	49	60	1350000	2	650.821	1300.63	0	-2.55	25.29	7752	7752	MS2	0/0	0	0	hala.raw
High	A	2	APSSSSLNSATSSQSK	2354	Unambiguous	DnaJ homolog subfamily C member 21 OS=Homo sapiens OX=9606 GN=DNAJC21 PE=1 SV=2 - [DJC21_HUMAN]	1	1	Q5F1R6		HCD	1	0	1	1	0	0.00235	128	129	1.41	0	41	60	666000	2	769.867	1538.73	0	-1.05	25.3	7754	7754	MS2	0/0	0	0	hala.raw
Middle	A	2	EGIPPQQQR	1947	Unambiguous	NEDD8 OS=Homo sapiens OX=9606 GN=NEDD8 PE=1 SV=1 - [NEDD8_HUMAN]	1	1	Q15843		HCD	1	0	1	1	0.014	0.187	152	153	1.06	0	56	60	590000	2	526.778	1052.55	0	-0.46	25.3	7758	7758	MS2	0/0	0	0	hala.raw
High	A	2	VSQGSKDPAEGDGAQPEETPR	2364	Unambiguous	Neutral alpha-glucosidase AB OS=Homo sapiens OX=9606 GN=GANAB PE=1 SV=3 - [GANAB_HUMAN]	1	1	Q14697		HCD	1	0	1	1	0.006	0.0804	102	104	1.38	1	31	60	486000	3	719	2154.98	0	-2.75	25.3	7759	7759	MS2	0/0	0	0	hala.raw
High	A	2	cDSSPDSAEDVR	1957	Unambiguous	Alpha-2-HS-glycoprotein OS=Homo sapiens OX=9606 GN=AHSG PE=1 SV=2 - [FETUA_HUMAN]	1	1	P02765	C1(Carbamidomethyl)	HCD	1	0	1	1	0	9.44e-06	10	8	2.66	0	5	55	8020000	2	669.266	1337.52	0	-2.7	25.32	7765	7765	MS2	0/0	0	0	hala.raw
High	A	2	AVTEQGHELSNEER	2348	Unambiguous	14-3-3 protein beta/alpha OS=Homo sapiens OX=9606 GN=YWHAB PE=1 SV=3 - [1433B_HUMAN]	1	1	P31946		HCD	1	0	1	1	0	2.04e-08	117	132	3.16	0	10	44	6340000	2	799.872	1598.74	0	-2.55	25.33	7769	7769	MS2	0/0	0	0	hala.raw
High	A	2	NKYEDEINK	2377	Unambiguous	Keratin, type II cytoskeletal 8 OS=Homo sapiens OX=9606 GN=KRT8 PE=1 SV=7 - [K2C8_HUMAN]|Keratin, type II cytoskeletal 6A OS=Homo sapiens OX=9606 GN=KRT6A PE=1 SV=3 - [K2C6A_HUMAN]|Keratin, type II cytoskeletal 79 OS=Homo sapiens OX=9606 GN=KRT79 PE=1 SV=2 - [K2C79_HUMAN]	7	1	P05787		HCD	1	0	1	1	0.002	0.0264	127	127	1.8	1	36	60	2720000	2	576.779	1152.55	0	-2.04	25.33	7770	7770	MS2	0/0	0	0	hala.raw
High	A	2	STSSHGTDEMESSSYR	2379	Unambiguous	PHD finger protein 6 OS=Homo sapiens OX=9606 GN=PHF6 PE=1 SV=1 - [PHF6_HUMAN]	1	1	Q8IWS0		HCD	1	0	1	1	0.001	0.0142	6	14	1.56	0	14	60	1370000	3	587.572	1760.7	0	-1.28	25.33	7771	7771	MS2	0/0	0	0	hala.raw
High	A	2	SVSGTDVQEEcR	2381	Unambiguous	Nuclear autoantigenic sperm protein OS=Homo sapiens OX=9606 GN=NASP PE=1 SV=2 - [NASP_HUMAN]	1	1	P49321	C11(Carbamidomethyl)	HCD	1	0	1	1	0	9.43e-05	36	38	1.81	0	35	60	2100000	2	683.797	1366.59	0	-2.96	25.33	7772	7772	MS2	0/0	0	0	hala.raw
High	A	2	TTASEPVEQSEATSK	2385	Unambiguous	Pre-mRNA-splicing regulator WTAP OS=Homo sapiens OX=9606 GN=WTAP PE=1 SV=2 - [FL2D_HUMAN]	1	1	Q15007		HCD	1	0	1	1	0	0.000525	126	117	1.81	0	30	60	1030000	2	782.869	1564.73	0	-1.76	25.33	7774	7774	MS2	0/0	0	0	hala.raw
High	A	2	LEScGVTSDNcR	2394	Unambiguous	Ribonuclease inhibitor OS=Homo sapiens OX=9606 GN=RNH1 PE=1 SV=2 - [RINI_HUMAN]	1	1	P13489	C4(Carbamidomethyl); C11(Carbamidomethyl)	HCD	1	0	1	1	0	5.19e-06	20	21	2.02	0	11	60	1100000	2	699.291	1397.57	0	-2.91	25.34	7779	7779	MS2	0/0	0	0	hala.raw
Middle	A	2	AQQQEEQGSVNDVKEEEK	2396	Unambiguous	Ribosomal biogenesis protein LAS1L OS=Homo sapiens OX=9606 GN=LAS1L PE=1 SV=2 - [LAS1L_HUMAN]	1	1	Q9Y4W2		HCD	1	0	1	1	0.047	0.453	105	107	1.41	1	7	60	642000	3	692.32	2074.95	0	-2.83	25.34	7780	7780	MS2	0/0	0	0	hala.raw
High	A	2	RNAAPPPSNTEAPPGETR	2398	Unambiguous	ATP-dependent RNA helicase DDX24 OS=Homo sapiens OX=9606 GN=DDX24 PE=1 SV=1 - [DDX24_HUMAN]	1	1	Q9GZR7		HCD	1	0	1	1	0.001	0.014	191	196	1.65	1	43	60	1010000	3	621.308	1861.91	0	-3.61	25.35	7781	7781	MS2	0/0	0	0	hala.raw
High	A	2	cEMEQQNQEYK	2005	Unambiguous	Keratin, type I cytoskeletal 17 OS=Homo sapiens OX=9606 GN=KRT17 PE=1 SV=2 - [K1C17_HUMAN]	2	1	Q04695	C1(Carbamidomethyl)	HCD	1	0	1	1	0	9.75e-06	11	20	2.83	0	0	24	17100000	2	743.799	1486.59	0	-2.19	25.36	7790	7790	MS2	0/0	0	0	hala.raw
High	A	2	NIDEHANEDVER	2418	Unambiguous	Ras-related protein Rab-10 OS=Homo sapiens OX=9606 GN=RAB10 PE=1 SV=1 - [RAB10_HUMAN]	1	1	P61026		HCD	1	0	1	1	0	1.51e-06	54	55	2.38	0	27	60	1850000	2	720.821	1440.63	0	-0.92	25.37	7792	7792	MS2	0/0	0	0	hala.raw
High	A	2	NIDEHANEDVER	2418	Unambiguous	Ras-related protein Rab-10 OS=Homo sapiens OX=9606 GN=RAB10 PE=1 SV=1 - [RAB10_HUMAN]	1	1	P61026		HCD	1	0	1	1	0	0.00523	55	52	2.15	0	17	60	4790000	3	480.882	1440.63	0	-1.95	25.37	7793	7793	MS2	0/0	0	0	hala.raw
High	A	2	VAPAQPSEEGPGR	2422	Unambiguous	Eukaryotic translation initiation factor 4B OS=Homo sapiens OX=9606 GN=EIF4B PE=1 SV=2 - [IF4B_HUMAN]	1	1	P23588		HCD	1	0	1	1	0	2.43e-05	178	203	2.25	0	22	60	4400000	2	647.822	1294.64	0	-2.23	25.37	7794	7794	MS2	0/0	0	0	hala.raw
High	A	2	TEAPAAPAAQETK	2424	Unambiguous	Brain acid soluble protein 1 OS=Homo sapiens OX=9606 GN=BASP1 PE=1 SV=2 - [BASP1_HUMAN]	1	1	P80723		HCD	1	0	1	1	0	5.08e-05	150	161	2.24	0	42	57	3020000	2	642.823	1284.64	0	-2.93	25.37	7795	7795	MS2	0/0	0	0	hala.raw
High	A	2	VAVTEGcQPSR	2426	Unambiguous	Filamin-B OS=Homo sapiens OX=9606 GN=FLNB PE=1 SV=2 - [FLNB_HUMAN]	1	1	O75369	C7(Carbamidomethyl)	HCD	1	0	1	1	0	0.000579	110	111	1.92	0	56	60	2370000	2	602.291	1203.57	0	-3.79	25.37	7796	7796	MS2	0/0	0	0	hala.raw
High	A	2	YYLHDDREGEGSDK	2387	Unambiguous	Thyroid hormone receptor-associated protein 3 OS=Homo sapiens OX=9606 GN=THRAP3 PE=1 SV=2 - [TR150_HUMAN]	1	1	Q9Y2W1		HCD	1	0	1	1	0	0.00721	32	31	1.25	1	18	60	2280000	3	561.912	1683.72	0	-1.12	25.37	7797	7797	MS2	0/0	0	0	hala.raw
High	A	2	AGQSAAGAAPGGGVDTR	2432	Unambiguous	Filamin-A OS=Homo sapiens OX=9606 GN=FLNA PE=1 SV=4 - [FLNA_HUMAN]	1	1	P21333		HCD	1	0	1	1	0	0.00161	166	146	2.08	0	54	60	1610000	2	721.854	1442.7	0	1.57	25.38	7799	7799	MS2	0/0	0	0	hala.raw
High	A	2	SGAEVEAGDAAER	2434	Unambiguous	Ribonucleoprotein PTB-binding 1 OS=Homo sapiens OX=9606 GN=RAVER1 PE=1 SV=1 - [RAVR1_HUMAN]	1	1	Q8IY67		HCD	1	0	1	1	0	0.00634	59	67	1.24	0	56	60	1340000	2	631.285	1261.56	0	-2.79	25.38	7800	7800	MS2	0/0	0	0	hala.raw
High	A	2	APKPDGPGGGPGGSHMGGNYGDDRR	2436	Unambiguous	RNA-binding protein FUS OS=Homo sapiens OX=9606 GN=FUS PE=1 SV=1 - [FUS_HUMAN]	1	1	P35637		HCD	1	0	1	1	0	1.19e-08	65	62	1.77	1	10	60	482000	5	482.619	2409.07	0	-3.31	25.38	7801	7801	MS2	0/0	0	0	hala.raw
High	A	2	IAMENDDGRTEEEK	2441	Unambiguous	Ataxin-2-like protein OS=Homo sapiens OX=9606 GN=ATXN2L PE=1 SV=2 - [ATX2L_HUMAN]	1	1	Q8WWM7		HCD	1	0	1	2	0.001	0.0163	60	54	1.17	1	58	60	4020000	3	546.246	1636.72	0	7.05	25.38	7803	7803	MS2	0/0	0	0	hala.raw
High	A	2	DSYVGDEAQSK	2007	Unambiguous	Actin, alpha cardiac muscle 1 OS=Homo sapiens OX=9606 GN=ACTC1 PE=1 SV=1 - [ACTC_HUMAN]|Actin, cytoplasmic 1 OS=Homo sapiens OX=9606 GN=ACTB PE=1 SV=1 - [ACTB_HUMAN]	6	2	P68032;P60709		HCD	1	0	1	1	0	0.00168	53	54	1.6	0	0	1	232000000	2	599.764	1198.52	0	-1.03	25.4	7811	7811	MS2	0/0	0	0	hala.raw
High	A	2	NYQQNYQNSESGEK	2027	Unambiguous	Nuclease-sensitive element-binding protein 1 OS=Homo sapiens OX=9606 GN=YBX1 PE=1 SV=3 - [YBOX1_HUMAN]	1	1	P67809		HCD	1	0	1	1	0	3.74e-07	27	34	2.68	0	0	60	6450000	2	844.859	1688.71	0	-1.92	25.4	7812	7812	MS2	0/0	0	0	hala.raw
High	A	2	GVTEcYEcHPKPTQR	2460	Unambiguous	SUMO-activating enzyme subunit 2 OS=Homo sapiens OX=9606 GN=UBA2 PE=1 SV=2 - [SAE2_HUMAN]	1	1	Q9UBT2	C5(Carbamidomethyl); C8(Carbamidomethyl)	HCD	1	0	1	1	0	0.000674	68	73	1.68	0	42	60	1220000	3	621.281	1861.83	0	-2.02	25.4	7814	7814	MS2	0/0	0	0	hala.raw
High	A	2	QASEGPLK	1421	Unambiguous	Glyceraldehyde-3-phosphate dehydrogenase OS=Homo sapiens OX=9606 GN=GAPDH PE=1 SV=3 - [G3P_HUMAN]	1	1	P04406		HCD	1	0	1	1	0.006	0.09	87	104	1.56	0	44	60	675000	2	415.224	829.44	0	-1.17	25.41	7817	7817	MS2	0/0	0	0	hala.raw
High	A	2	LEDNPSSGSPPR	2472	Unambiguous	CTD small phosphatase-like protein 2 OS=Homo sapiens OX=9606 GN=CTDSPL2 PE=1 SV=2 - [CTSL2_HUMAN]	1	1	Q05D32		HCD	1	0	1	1	0	5.27e-06	110	100	2.33	0	55	60	2040000	2	628.298	1255.59	0	-2.35	25.41	7820	7820	MS2	0/0	0	0	hala.raw
High	A	2	DREEDEEDAYER	2476	Unambiguous	RNA-binding protein 25 OS=Homo sapiens OX=9606 GN=RBM25 PE=1 SV=3 - [RBM25_HUMAN]	1	1	P49756		HCD	1	0	1	1	0.002	0.0322	6	9	1.58	1	58	60	1220000	2	778.309	1555.61	0	-2.71	25.42	7822	7822	MS2	0/0	0	0	hala.raw
Middle	A	2	KYDYDSSSVR	2484	Unambiguous	Niban-like protein 1 OS=Homo sapiens OX=9606 GN=FAM129B PE=1 SV=3 - [NIBL1_HUMAN]	1	1	Q96TA1		HCD	1	0	1	1	0.038	0.392	65	63	0.95	1	66	60	278000	3	407.19	1219.56	0	-2.07	25.43	7828	7828	MS2	0/0	0	0	hala.raw
High	A	2	HRPSEADEEELAR	2491	Unambiguous	AP-3 complex subunit delta-1 OS=Homo sapiens OX=9606 GN=AP3D1 PE=1 SV=1 - [AP3D1_HUMAN]	1	1	O14617		HCD	1	0	1	1	0	4.38e-06	109	125	3.13	0	26	60	1450000	3	513.577	1538.72	0	-1.78	25.45	7836	7836	MS2	0/0	0	0	hala.raw
High	A	2	EIQTAVR	2495	Unambiguous	Histone H2B type 1-J OS=Homo sapiens OX=9606 GN=HIST1H2BJ PE=1 SV=3 - [H2B1J_HUMAN]|Histone H2B type 1-K OS=Homo sapiens OX=9606 GN=HIST1H2BK PE=1 SV=3 - [H2B1K_HUMAN]	14	2	P06899;O60814		HCD	1	0	1	1	0.003	0.0437	237	216	1.43	0	38	60	654000	2	408.731	816.456	0	-2.15	25.45	7838	7838	MS2	0/0	0	0	hala.raw
Middle	A	2	VAAASGHcGAFSGSDSSR	2522	Unambiguous	Constitutive coactivator of PPAR-gamma-like protein 1 OS=Homo sapiens OX=9606 GN=FAM120A PE=1 SV=2 - [F120A_HUMAN]	1	1	Q9NZB2	C8(Carbamidomethyl)	HCD	1	0	1	1	0.036	0.386	41	35	0.47	0	0	60	91700	2	862.374	1723.74	0	-2.16	25.47	7854	7854	MS2	0/0	0	0	hala.raw
High	A	2	ENQQATSGPNQPSVR	2078	Unambiguous	Y-box-binding protein 3 OS=Homo sapiens OX=9606 GN=YBX3 PE=1 SV=4 - [YBOX3_HUMAN]	1	1	P16989		HCD	1	0	1	1	0	8.84e-05	139	139	1.71	0	30	60	1810000	2	806.886	1612.76	0	-1.86	25.49	7859	7859	MS2	0/0	0	0	hala.raw
High	A	2	HPSKPDPSGEcNPDLR	2541	Unambiguous	Histone-binding protein RBBP4 OS=Homo sapiens OX=9606 GN=RBBP4 PE=1 SV=3 - [RBBP4_HUMAN]	1	1	Q09028	C11(Carbamidomethyl)	HCD	1	0	1	1	0	0.00257	101	87	1.42	0	5	60	1940000	4	452.211	1805.82	0	-0.93	25.49	7863	7863	MS2	0/0	0	0	hala.raw
High	A	2	HPAKPDPSGEcNPDLR	2545	Unambiguous	Histone-binding protein RBBP7 OS=Homo sapiens OX=9606 GN=RBBP7 PE=1 SV=1 - [RBBP7_HUMAN]	1	1	Q16576	C11(Carbamidomethyl)	HCD	1	0	1	1	0.001	0.0109	118	117	0.86	0	16	60	1060000	2	895.417	1789.83	0	-0.97	25.49	7865	7865	MS2	0/0	0	0	hala.raw
High	A	2	SPGSTPTTPTSSQAPQK	2565	Unambiguous	Nuclear pore complex protein Nup214 OS=Homo sapiens OX=9606 GN=NUP214 PE=1 SV=2 - [NU214_HUMAN]	1	1	P35658		HCD	1	0	1	1	0.001	0.0207	185	179	0.96	0	29	60	1210000	2	836.412	1671.82	0	-1.36	25.51	7873	7873	MS2	0/0	0	0	hala.raw
High	A	2	HPSKPDPSGEcNPDLR	2541	Unambiguous	Histone-binding protein RBBP4 OS=Homo sapiens OX=9606 GN=RBBP4 PE=1 SV=3 - [RBBP4_HUMAN]	1	1	Q09028	C11(Carbamidomethyl)	HCD	1	0	1	1	0.001	0.0126	114	104	0.63	0	18	60	493000	2	903.416	1805.82	0	0.37	25.52	7878	7878	MS2	0/0	0	0	hala.raw
High	A	2	VEAKPEVQSQPPR	2584	Unambiguous	Ras GTPase-activating protein-binding protein 2 OS=Homo sapiens OX=9606 GN=G3BP2 PE=1 SV=2 - [G3BP2_HUMAN]	1	1	Q9UN86		HCD	1	0	1	1	0	3.12e-05	209	195	2.31	0	24	60	2450000	3	488.931	1464.78	0	-0.9	25.53	7883	7883	MS2	0/0	0	0	hala.raw
High	A	2	AAPTAASDQPDSAATTEK	2590	Unambiguous	Partner of Y14 and mago OS=Homo sapiens OX=9606 GN=PYM1 PE=1 SV=1 - [PYM1_HUMAN]	1	1	Q9BRP8		HCD	1	0	1	1	0	0.00192	112	102	1.5	0	9	60	1630000	2	866.404	1731.8	0	-1.19	25.53	7886	7886	MS2	0/0	0	0	hala.raw
High	A	2	EYNEDEDPAAR	2592	Unambiguous	Protein Red OS=Homo sapiens OX=9606 GN=IK PE=1 SV=3 - [RED_HUMAN]	1	1	Q13123		HCD	1	0	1	1	0	1.7e-05	17	17	2.43	0	48	60	1380000	2	654.77	1308.53	0	-0.7	25.53	7887	7887	MS2	0/0	0	0	hala.raw
High	A	2	EcNPPNSQPASYQR	2594	Unambiguous	Peptidyl-prolyl cis-trans isomerase G OS=Homo sapiens OX=9606 GN=PPIG PE=1 SV=2 - [PPIG_HUMAN]	1	1	Q13427	C2(Carbamidomethyl)	HCD	1	0	1	1	0.008	0.114	39	46	0.99	0	25	60	635000	2	824.36	1647.71	0	-3.84	25.54	7889	7889	MS2	0/0	0	0	hala.raw
High	A	2	LGIHEDSTNR	2603	Unambiguous	Heat shock protein HSP 90-beta OS=Homo sapiens OX=9606 GN=HSP90AB1 PE=1 SV=4 - [HS90B_HUMAN]	1	1	P08238		HCD	1	0	1	1	0.008	0.12	139	127	1.04	0	48	60	552000	2	571.28	1141.55	0	-6.25	25.55	7895	7895	MS2	0/0	0	0	hala.raw
High	A	2	QVHPDTGISSK	1802	Unambiguous	Histone H2B type 1-J OS=Homo sapiens OX=9606 GN=HIST1H2BJ PE=1 SV=3 - [H2B1J_HUMAN]|Histone H2B type 1-K OS=Homo sapiens OX=9606 GN=HIST1H2BK PE=1 SV=3 - [H2B1K_HUMAN]	15	2	P06899;O60814		HCD	1	0	1	1	0.005	0.0654	153	143	1.3	0	14	60	1550000	3	390.203	1168.59	0	-1.24	25.56	7899	7899	MS2	0/0	0	0	hala.raw
Middle	A	2	QQSAQSQVSTTAENK	1811	Unambiguous	RNA cytidine acetyltransferase OS=Homo sapiens OX=9606 GN=NAT10 PE=1 SV=2 - [NAT10_HUMAN]	1	1	Q9H0A0		HCD	1	0	1	1	0.015	0.198	147	142	0.95	0	19	60	331000	2	803.888	1606.77	0	0.91	25.56	7901	7901	MS2	0/0	0	0	hala.raw
High	A	2	TYGEPESAGPSR	2616	Unambiguous	Emerin OS=Homo sapiens OX=9606 GN=EMD PE=1 SV=1 - [EMD_HUMAN]	1	1	P50402		HCD	1	0	1	1	0	5.62e-06	83	86	2.34	0	27	60	6160000	2	625.785	1250.56	0	-1.23	25.56	7903	7903	MS2	0/0	0	0	hala.raw
High	A	2	IEGDPQGVQQAK	2623	Unambiguous	Vigilin OS=Homo sapiens OX=9606 GN=HDLBP PE=1 SV=2 - [VIGLN_HUMAN]	1	1	Q00341		HCD	1	0	1	1	0	0.00803	146	151	1.68	0	51	60	1980000	2	635.324	1269.64	0	-1.97	25.57	7906	7906	MS2	0/0	0	0	hala.raw
High	A	2	QAVEQQIQSHR	2627	Unambiguous	Kinesin-1 heavy chain OS=Homo sapiens OX=9606 GN=KIF5B PE=1 SV=1 - [KINH_HUMAN]	1	1	P33176		HCD	1	0	1	1	0	0.0085	204	224	1.79	0	25	60	1180000	3	441.899	1323.68	0	4.17	25.57	7908	7908	MS2	0/0	0	0	hala.raw
High	A	2	ESENLASGDQPR	2631	Unambiguous	tRNA (guanine(26)-N(2))-dimethyltransferase OS=Homo sapiens OX=9606 GN=TRMT1 PE=1 SV=1 - [TRM1_HUMAN]	1	1	Q9NXH9		HCD	1	0	1	1	0	0.00941	48	42	1.97	0	49	60	1000000	2	651.797	1302.59	0	-4.42	25.57	7910	7910	MS2	0/0	0	0	hala.raw
Middle	A	2	IDRTDAISEEK	2633	Unambiguous	GTP-binding protein SAR1a OS=Homo sapiens OX=9606 GN=SAR1A PE=1 SV=1 - [SAR1A_HUMAN]	1	1	Q9NR31		HCD	1	0	1	1	0.042	0.424	195	203	1.07	1	25	60	653000	3	426.217	1276.64	0	-0.69	25.57	7911	7911	MS2	0/0	0	0	hala.raw
High	A	2	GVPAGNSDTEGGQPGR	1791	Unambiguous	Apoptotic chromatin condensation inducer in the nucleus OS=Homo sapiens OX=9606 GN=ACIN1 PE=1 SV=2 - [ACINU_HUMAN]	1	1	Q9UKV3		HCD	1	0	1	1	0.001	0.0158	98	88	1.07	0	26	60	527000	2	749.846	1498.68	0	-2.69	25.58	7913	7913	MS2	0/0	0	0	hala.raw
High	A	2	NQGGYGGSSSSSSYGSGR	1600	Unambiguous	Heterogeneous nuclear ribonucleoprotein A1 OS=Homo sapiens OX=9606 GN=HNRNPA1 PE=1 SV=5 - [ROA1_HUMAN]	1	1	P09651		HCD	1	0	1	1	0	2.84e-12	13	9	3.88	0	0	13	29500000	2	847.852	1694.7	0	-1.88	25.59	7920	7920	MS2	0/0	0	0	hala.raw
High	A	2	HPAKPDPSGEcNPDLR	2545	Unambiguous	Histone-binding protein RBBP7 OS=Homo sapiens OX=9606 GN=RBBP7 PE=1 SV=1 - [RBBP7_HUMAN]	1	1	Q16576	C11(Carbamidomethyl)	HCD	1	0	1	1	0	6.76e-06	113	115	2.64	0	19	17	15300000	3	597.281	1789.83	0	0.08	25.6	7923	7923	MS2	0/0	0	0	hala.raw
High	A	2	IHEGcEEPATHNALAK	2654	Unambiguous	Clathrin heavy chain 1 OS=Homo sapiens OX=9606 GN=CLTC PE=1 SV=5 - [CLH1_HUMAN]	1	1	Q00610	C5(Carbamidomethyl)	HCD	1	0	1	1	0	1.75e-07	148	143	3.33	0	18	58	6770000	3	592.949	1776.83	0	-0.39	25.6	7924	7924	MS2	0/0	0	0	hala.raw
High	A	2	GPAAAQGSAAAPAEPK	2658	Unambiguous	Ubiquilin-2 OS=Homo sapiens OX=9606 GN=UBQLN2 PE=1 SV=2 - [UBQL2_HUMAN]	1	1	Q9UHD9		HCD	1	0	1	1	0	2.54e-05	198	201	2.57	0	30	60	2900000	2	697.355	1393.7	0	-2.65	25.6	7926	7926	MS2	0/0	0	0	hala.raw
High	A	2	cDVTDNQSEVADK	2660	Unambiguous	Nuclear pore complex protein Nup93 OS=Homo sapiens OX=9606 GN=NUP93 PE=1 SV=2 - [NUP93_HUMAN]	1	1	Q8N1F7	C1(Carbamidomethyl)	HCD	1	0	1	1	0	8.16e-06	36	42	2.33	0	15	60	2200000	2	740.813	1480.62	0	-1.63	25.6	7927	7927	MS2	0/0	0	0	hala.raw
High	A	2	FQDDNVEGDK	2662	Unambiguous	Nuclear pore complex protein Nup205 OS=Homo sapiens OX=9606 GN=NUP205 PE=1 SV=3 - [NU205_HUMAN]	1	1	Q92621		HCD	1	0	1	1	0	0.000472	36	31	1.71	0	57	60	2070000	2	583.751	1166.49	0	-1.1	25.6	7928	7928	MS2	0/0	0	0	hala.raw
Middle	A	2	EFDEDSEDR	1793	Unambiguous	Septin-9 OS=Homo sapiens OX=9606 GN=SEPT9 PE=1 SV=2 - [SEPT9_HUMAN]	1	1	Q9UHD8		HCD	1	0	1	1	0.013	0.185	11	8	0.98	0	56	60	463000	2	571.218	1141.43	0	0.82	25.61	7931	7931	MS2	0/0	0	0	hala.raw
Middle	A	2	LVAGEmGQNEPDQGGQR	2680	Unambiguous	3-hydroxyacyl-CoA dehydrogenase type-2 OS=Homo sapiens OX=9606 GN=HSD17B10 PE=1 SV=3 - [HCD2_HUMAN]	1	1	Q99714	M6(Oxidation)	HCD	1	0	1	1	0.041	0.413	74	78	0.47	0	12	60	553000	2	901.409	1801.81	0	-1.86	25.62	7937	7937	MS2	0/0	0	0	hala.raw
High	A	2	TQASSSFQDSSQPAGK	2684	Unambiguous	Probable 28S rRNA (cytosine(4447)-C(5))-methyltransferase OS=Homo sapiens OX=9606 GN=NOP2 PE=1 SV=2 - [NOP2_HUMAN]	1	1	P46087		HCD	1	0	1	1	0	0.000463	87	104	1.48	0	0	60	419000	2	813.374	1625.74	0	0.41	25.62	7939	7939	MS2	0/0	0	0	hala.raw
Middle	A	2	SYSEDDIHR	2153	Unambiguous	YTH domain-containing family protein 1 OS=Homo sapiens OX=9606 GN=YTHDF1 PE=1 SV=1 - [YTHD1_HUMAN]	3	1	Q9BYJ9		HCD	1	0	1	1	0.025	0.289	42	51	1.05	0	41	60	282000	3	374.499	1121.48	0	-2.21	25.63	7943	7943	MS2	0/0	0	0	hala.raw
High	A	2	DPAEGDGAQPEETPR	2690	Unambiguous	Neutral alpha-glucosidase AB OS=Homo sapiens OX=9606 GN=GANAB PE=1 SV=3 - [GANAB_HUMAN]	1	1	Q14697		HCD	1	0	1	1	0	7.98e-10	45	51	3.78	0	14	60	6280000	2	784.843	1568.68	0	-2.56	25.63	7944	7944	MS2	0/0	0	0	hala.raw
High	A	2	DSYESYGNSR	2696	Unambiguous	RNA-binding motif protein, X chromosome OS=Homo sapiens OX=9606 GN=RBMX PE=1 SV=3 - [RBMX_HUMAN]	2	1	P38159		HCD	1	0	1	1	0	0.0015	17	18	1.45	0	19	60	2500000	2	589.242	1177.48	0	0.62	25.64	7947	7947	MS2	0/0	0	0	hala.raw
High	A	2	RQLEEAEEEAQR	2698	Unambiguous	Myosin-9 OS=Homo sapiens OX=9606 GN=MYH9 PE=1 SV=4 - [MYH9_HUMAN]	1	1	P35579		HCD	1	0	1	1	0	0.000192	129	123	3.45	1	15	60	1570000	3	496.574	1487.71	0	0.07	25.64	7948	7948	MS2	0/0	0	0	hala.raw
High	A	2	ENPYYDSR	2700	Unambiguous	Clathrin heavy chain 1 OS=Homo sapiens OX=9606 GN=CLTC PE=1 SV=5 - [CLH1_HUMAN]	1	1	Q00610		HCD	1	0	1	1	0.005	0.065	21	32	1.71	0	34	60	1670000	2	522.224	1043.44	0	-1.84	25.64	7949	7949	MS2	0/0	0	0	hala.raw
Middle	A	2	IDRTDAISEEK	2633	Unambiguous	GTP-binding protein SAR1a OS=Homo sapiens OX=9606 GN=SAR1A PE=1 SV=1 - [SAR1A_HUMAN]	1	1	Q9NR31		HCD	1	0	1	1	0.029	0.329	186	199	1.66	1	34	60	1170000	2	638.821	1276.63	0	-2.4	25.64	7950	7950	MS2	0/0	0	0	hala.raw
High	A	2	DDFTEER	2704	Unambiguous	Succinate dehydrogenase [ubiquinone] iron-sulfur subunit, mitochondrial OS=Homo sapiens OX=9606 GN=SDHB PE=1 SV=3 - [SDHB_HUMAN]	1	1	P21912		HCD	1	0	1	1	0.007	0.101	23	24	1.34	0	25	60	1080000	2	456.19	911.372	0	-2.11	25.64	7951	7951	MS2	0/0	0	0	hala.raw
Middle	A	2	IHEGcEEPATHNALAK	2654	Unambiguous	Clathrin heavy chain 1 OS=Homo sapiens OX=9606 GN=CLTC PE=1 SV=5 - [CLH1_HUMAN]	1	1	Q00610	C5(Carbamidomethyl)	HCD	1	0	1	1	0.041	0.412	150	141	0.69	0	44	60	830000	2	888.919	1776.83	0	-2	25.65	7956	7956	MS2	0/0	0	0	hala.raw
High	A	2	NTDQASMPDNTAAQK	2728	Unambiguous	Myosin-9 OS=Homo sapiens OX=9606 GN=MYH9 PE=1 SV=4 - [MYH9_HUMAN]	2	1	P35579		HCD	1	0	1	1	0	9.56e-06	47	43	2.75	0	12	49	9910000	2	796.352	1591.7	0	-2.63	25.67	7965	7965	MS2	0/0	0	0	hala.raw
High	A	2	ESEPQAAAEPAEAK	2735	Unambiguous	Brain acid soluble protein 1 OS=Homo sapiens OX=9606 GN=BASP1 PE=1 SV=2 - [BASP1_HUMAN]	1	1	P80723		HCD	1	0	1	1	0	1.12e-05	93	102	2.25	0	15	60	5200000	2	714.336	1427.66	0	-0.34	25.67	7968	7968	MS2	0/0	0	0	hala.raw
High	A	2	IEGDETSTEAATR	2163	Unambiguous	DNA-directed RNA polymerases I, II, and III subunit RPABC3 OS=Homo sapiens OX=9606 GN=POLR2H PE=1 SV=4 - [RPAB3_HUMAN]	1	1	P52434		HCD	1	0	1	1	0	0.00557	76	94	1.83	0	29	60	2260000	2	690.315	1379.62	0	-4.58	25.68	7970	7970	MS2	0/0	0	0	hala.raw
High	A	2	EEDcHSPTSKPPKPDQPLK	2694	Unambiguous	Eukaryotic translation initiation factor 4B OS=Homo sapiens OX=9606 GN=EIF4B PE=1 SV=2 - [IF4B_HUMAN]	1	1	P23588	C4(Carbamidomethyl)	HCD	1	0	1	1	0.001	0.0108	168	159	1.9	0	7	60	922000	3	730.688	2190.05	0	-0.19	25.68	7972	7972	MS2	0/0	0	0	hala.raw
High	A	2	YDDmAAcMK	2751	Unambiguous	14-3-3 protein zeta/delta OS=Homo sapiens OX=9606 GN=YWHAZ PE=1 SV=1 - [1433Z_HUMAN]	1	1	P63104	M4(Oxidation); C7(Carbamidomethyl)	HCD	1	0	1	1	0.003	0.0353		3	1.18	0	71	60	809000	2	560.708	1120.41	0	-1.22	25.68	7976	7976	MS2	0/0	0	0	hala.raw
High	A	2	EEDcHSPTSKPPKPDQPLK	2694	Unambiguous	Eukaryotic translation initiation factor 4B OS=Homo sapiens OX=9606 GN=EIF4B PE=1 SV=2 - [IF4B_HUMAN]	1	1	P23588	C4(Carbamidomethyl)	HCD	1	0	1	1	0.004	0.0606	166	163	1.08	0	7	60	1710000	5	438.815	2190.05	0	-1.02	25.69	7980	7980	MS2	0/0	0	0	hala.raw
High	A	2	TPPSEEDSAEAER	1900	Unambiguous	Small glutamine-rich tetratricopeptide repeat-containing protein alpha OS=Homo sapiens OX=9606 GN=SGTA PE=1 SV=1 - [SGTA_HUMAN]	1	1	O43765		HCD	1	0	1	1	0	8.18e-05	29	26	1.92	0	31	60	1570000	2	709.304	1417.6	0	-5.08	25.69	7981	7981	MS2	0/0	0	0	hala.raw
High	A	2	SYcNDQSTGDIK	2763	Unambiguous	Hypoxanthine-guanine phosphoribosyltransferase OS=Homo sapiens OX=9606 GN=HPRT1 PE=1 SV=2 - [HPRT_HUMAN]	1	1	P00492	C3(Carbamidomethyl)	HCD	1	0	1	1	0	7.81e-05	25	26	2	0	28	60	5970000	2	694.292	1387.58	0	-1.29	25.7	7983	7983	MS2	0/0	0	0	hala.raw
High	A	2	QPVAGSEGAQYR	2765	Unambiguous	Testin OS=Homo sapiens OX=9606 GN=TES PE=1 SV=1 - [TES_HUMAN]	1	1	Q9UGI8		HCD	1	0	1	1	0	1.34e-05	147	162	2.64	0	27	60	5010000	2	631.809	1262.61	0	-1.91	25.7	7984	7984	MS2	0/0	0	0	hala.raw
High	A	2	FQRPGDPQSAQDK	2265	Unambiguous	Splicing factor 1 OS=Homo sapiens OX=9606 GN=SF1 PE=1 SV=4 - [SF01_HUMAN]	1	1	Q15637		HCD	1	0	1	1	0	0.00299	146	142	1.67	0	11	60	1660000	3	491.907	1473.71	0	-0.57	25.7	7985	7985	MS2	0/0	0	0	hala.raw
High	A	2	YcDPDSYHR	1887	Unambiguous	Splicing factor U2AF 65 kDa subunit OS=Homo sapiens OX=9606 GN=U2AF2 PE=1 SV=4 - [U2AF2_HUMAN]	1	1	P26368	C2(Carbamidomethyl)	HCD	1	0	1	1	0.001	0.0176	11	8	1.46	0	13	60	1390000	3	404.829	1212.47	0	-1.67	25.71	7989	7989	MS2	0/0	0	0	hala.raw
High	A	2	NKYEDEINKR	2277	Unambiguous	Keratin, type II cytoskeletal 8 OS=Homo sapiens OX=9606 GN=KRT8 PE=1 SV=7 - [K2C8_HUMAN]|Keratin, type II cytoskeletal 6A OS=Homo sapiens OX=9606 GN=KRT6A PE=1 SV=3 - [K2C6A_HUMAN]	6	1	P05787		HCD	1	0	1	1	0	0.00413	213	226	2.05	2	17	59	4170000	3	436.889	1308.65	0	-1.26	25.74	8004	8004	MS2	0/0	0	0	hala.raw
High	A	2	SYSTTYEER	2809	Unambiguous	Neutral amino acid transporter B(0) OS=Homo sapiens OX=9606 GN=SLC1A5 PE=1 SV=2 - [AAAT_HUMAN]	1	1	Q15758		HCD	1	0	1	1	0	0.00368	43	50	1.87	0	38	41	6690000	2	568.248	1135.49	0	-1.24	25.74	8007	8007	MS2	0/0	0	0	hala.raw
High	A	2	YSGSEGSTQTLTK	2811	Unambiguous	Protein S100-P OS=Homo sapiens OX=9606 GN=S100P PE=1 SV=2 - [S100P_HUMAN]	1	1	P25815		HCD	1	0	1	1	0	2.91e-06	104	103	2.42	0	8	60	5410000	2	679.824	1358.64	0	-2.22	25.74	8008	8008	MS2	0/0	0	0	hala.raw
High	A	2	ETPAATEAPSSTPK	2813	Unambiguous	Brain acid soluble protein 1 OS=Homo sapiens OX=9606 GN=BASP1 PE=1 SV=2 - [BASP1_HUMAN]	1	1	P80723		HCD	1	0	1	1	0	6.74e-05	139	136	2.4	0	53	60	4620000	2	693.84	1386.67	0	-1.27	25.74	8009	8009	MS2	0/0	0	0	hala.raw
High	A	2	DYDAMGSQTK	2815	Unambiguous	RuvB-like 2 OS=Homo sapiens OX=9606 GN=RUVBL2 PE=1 SV=3 - [RUVB2_HUMAN]	1	1	Q9Y230		HCD	1	0	1	1	0	0.00327	29	17	1.45	0	43	60	1130000	2	558.235	1115.46	0	-3.79	25.74	8010	8010	MS2	0/0	0	0	hala.raw
High	A	2	YTQSNSVcYAK	2817	Unambiguous	Bifunctional purine biosynthesis protein PURH OS=Homo sapiens OX=9606 GN=ATIC PE=1 SV=3 - [PUR9_HUMAN]	1	1	P31939	C8(Carbamidomethyl)	HCD	1	0	1	1	0	0.00979	64	62	1.23	0	30	60	979000	2	660.797	1320.59	0	-1.28	25.75	8011	8011	MS2	0/0	0	0	hala.raw
High	A	2	SSPNMEQGSTYK	2821	Unambiguous	Pleckstrin-2 OS=Homo sapiens OX=9606 GN=PLEK2 PE=1 SV=1 - [PLEK2_HUMAN]	1	1	Q9NYT0		HCD	1	0	1	1	0.004	0.0498	51	45	1.13	0	10	60	2350000	2	664.791	1328.57	0	-3.19	25.75	8013	8013	MS2	0/0	0	0	hala.raw
High	A	2	YSEGYPGQR	2823	Unambiguous	Serine hydroxymethyltransferase, cytosolic OS=Homo sapiens OX=9606 GN=SHMT1 PE=1 SV=1 - [GLYC_HUMAN]	1	1	P34896		HCD	1	0	1	1	0.001	0.0162	71	63	1.29	0	16	60	2130000	2	528.74	1056.47	0	-1.49	25.75	8014	8014	MS2	0/0	0	0	hala.raw
Middle	A	2	VQESADELQK	2827	Unambiguous	ADP-ribosylation factor 5 OS=Homo sapiens OX=9606 GN=ARF5 PE=1 SV=2 - [ARF5_HUMAN]	1	1	P84085		HCD	1	0	1	1	0.036	0.386	158	153	0.94	0	40	60	500000	2	573.784	1146.56	0	-1.91	25.75	8016	8016	MS2	0/0	0	0	hala.raw
High	A	2	EVVEEAENGR	2307	Unambiguous	Prothymosin alpha OS=Homo sapiens OX=9606 GN=PTMA PE=1 SV=2 - [PTMA_HUMAN]	1	1	P06454		HCD	1	0	1	1	0	1.93e-05	79	87	2.74	0	2	10	30300000	2	566.267	1131.53	0	-1.59	25.77	8022	8022	MS2	0/0	0	0	hala.raw
High	A	2	IVQAEGEAEAAK	2837	Unambiguous	Prohibitin-2 OS=Homo sapiens OX=9606 GN=PHB2 PE=1 SV=2 - [PHB2_HUMAN]	1	1	Q99623		HCD	1	0	1	1	0	8.62e-05	152	167	2.09	0	10	24	12500000	2	608.313	1215.62	0	-3.01	25.77	8025	8025	MS2	0/0	0	0	hala.raw
High	A	2	LQQQQRPEDAEDGAEGGGK	1934	Unambiguous	tRNA (cytosine(34)-C(5))-methyltransferase OS=Homo sapiens OX=9606 GN=NSUN2 PE=1 SV=2 - [NSUN2_HUMAN]	1	1	Q08J23		HCD	1	0	1	1	0	0.00025	99	108	2.38	0	49	60	3920000	3	671.646	2012.92	0	-2.36	25.77	8026	8026	MS2	0/0	0	0	hala.raw
High	A	2	QVHPDTGISSK	1802	Unambiguous	Histone H2B type 1-J OS=Homo sapiens OX=9606 GN=HIST1H2BJ PE=1 SV=3 - [H2B1J_HUMAN]|Histone H2B type 1-K OS=Homo sapiens OX=9606 GN=HIST1H2BK PE=1 SV=3 - [H2B1K_HUMAN]	15	2	P06899;O60814		HCD	1	0	1	1	0.004	0.0492	153	143	1.31	0	59	60	1550000	2	584.801	1168.59	0	-1.02	25.77	8027	8027	MS2	0/0	0	0	hala.raw
High	A	2	SYSEDDIHR	2153	Unambiguous	YTH domain-containing family protein 1 OS=Homo sapiens OX=9606 GN=YTHDF1 PE=1 SV=1 - [YTHD1_HUMAN]	3	1	Q9BYJ9		HCD	1	0	1	1	0	0.00217	43	49	1.36	0	40	60	1020000	2	561.245	1121.48	0	-3.1	25.78	8028	8028	MS2	0/0	0	0	hala.raw
High	A	2	TPHYGSQTPLHDGSR	2845	Unambiguous	Transcription elongation factor SPT5 OS=Homo sapiens OX=9606 GN=SUPT5H PE=1 SV=1 - [SPT5H_HUMAN]	1	1	O00267		HCD	1	0	1	1	0	0.000209	164	148	1.54	0	7	60	825000	4	413.949	1652.77	0	-2.58	25.78	8029	8029	MS2	0/0	0	0	hala.raw
Middle	A	2	VFVGNFSQAcDPK	2847	Unambiguous	Serine/threonine/tyrosine-interacting-like protein 1 OS=Homo sapiens OX=9606 GN=STYXL1 PE=1 SV=1 - [STYL1_HUMAN]	1	1	Q9Y6J8	C10(Carbamidomethyl)	HCD	1	0	1	1	0.049	0.473	130	141	0.79	0	8	60	346000	4	367.93	1468.7	0	5.31	25.78	8030	8030	MS2	0/0	0	0	hala.raw
High	A	2	QQIcNQQPPcSR	2287	Unambiguous	Zinc finger CCCH-type antiviral protein 1 OS=Homo sapiens OX=9606 GN=ZC3HAV1 PE=1 SV=3 - [ZCCHV_HUMAN]	1	1	Q7Z2W4	C4(Carbamidomethyl); C10(Carbamidomethyl)	HCD	1	0	1	1	0.007	0.102	68	65	1.05	0	0	60	461000	2	758.34	1515.67	0	-3.89	25.78	8033	8033	MS2	0/0	0	0	hala.raw
High	A	2	AVTEQGHELSNEER	2348	Unambiguous	14-3-3 protein beta/alpha OS=Homo sapiens OX=9606 GN=YWHAB PE=1 SV=3 - [1433B_HUMAN]	1	1	P31946		HCD	1	0	1	1	0	1.64e-05	122	135	2.95	0	4	26	15000000	3	533.584	1598.74	0	-1.64	25.8	8039	8039	MS2	0/0	0	0	hala.raw
High	A	2	NEENTEPGAESSENADDPNK	2042	Unambiguous	Matrin-3 OS=Homo sapiens OX=9606 GN=MATR3 PE=1 SV=2 - [MATR3_HUMAN]	1	1	P43243		HCD	1	0	1	1	0.008	0.11	16	10	0.99	0	0	60	1430000	2	1073.93	2146.86	0	-2.21	25.8	8040	8040	MS2	0/0	0	0	hala.raw
Middle	A	2	QEEENPAEETGEEK	2324	Unambiguous	Alpha-endosulfine OS=Homo sapiens OX=9606 GN=ENSA PE=1 SV=1 - [ENSA_HUMAN]	1	1	O43768		HCD	1	0	1	1	0.011	0.148	22	16	0.92	0	0	60	1240000	2	809.836	1618.66	0	-4.15	25.8	8041	8041	MS2	0/0	0	0	hala.raw
High	A	2	SSSSSAASDTATSTQRPLR	2869	Unambiguous	RNA-binding protein 15 OS=Homo sapiens OX=9606 GN=RBM15 PE=1 SV=2 - [RBM15_HUMAN]	1	1	Q96T37		HCD	1	0	1	1	0	0.000755	149	162	2.13	0	36	60	1880000	3	637.31	1909.92	0	-2.85	25.8	8043	8043	MS2	0/0	0	0	hala.raw
High	A	2	VETVSQPSESPK	2871	Unambiguous	Protein SCAF11 OS=Homo sapiens OX=9606 GN=SCAF11 PE=1 SV=2 - [SCAFB_HUMAN]	1	1	Q99590		HCD	1	0	1	1	0.001	0.0207	160	149	1.43	0	54	60	1760000	2	644.324	1287.64	0	-1.8	25.8	8044	8044	MS2	0/0	0	0	hala.raw
High	A	2	cDSSPDSAEDVR	1957	Unambiguous	Alpha-2-HS-glycoprotein OS=Homo sapiens OX=9606 GN=AHSG PE=1 SV=2 - [FETUA_HUMAN]	1	1	P02765	C1(Carbamidomethyl)	HCD	1	0	1	1	0	1.91e-06	10	8	2.8	0	15	40	12000000	2	669.266	1337.52	0	-2.15	25.82	8053	8053	MS2	0/0	0	0	hala.raw
High	A	2	NIEEHASADVEK	2889	Unambiguous	Ras-related protein Rab-8A OS=Homo sapiens OX=9606 GN=RAB8A PE=1 SV=1 - [RAB8A_HUMAN]	1	1	P61006		HCD	1	0	1	1	0.001	0.0121	111	111	1.07	0	55	55	2380000	3	447.88	1341.63	0	-2.01	25.83	8056	8056	MS2	0/0	0	0	hala.raw
High	A	2	QPAQDTAPTPAPR	2891	Unambiguous	EH domain-binding protein 1-like protein 1 OS=Homo sapiens OX=9606 GN=EHBP1L1 PE=1 SV=2 - [EH1L1_HUMAN]	1	1	Q8N3D4		HCD	1	0	1	1	0	0.00223	203	213	2.13	0	43	60	1030000	2	675.339	1349.67	-0.01	-7.53	25.83	8057	8057	MS2	0/0	0	0	hala.raw
High	A	2	EMDEAATAEER	2893	Unambiguous	Eukaryotic translation initiation factor 4 gamma 1 OS=Homo sapiens OX=9606 GN=EIF4G1 PE=1 SV=4 - [IF4G1_HUMAN]	1	1	Q04637		HCD	1	0	1	1	0	0.000171	20	20	2.36	0	59	42	7890000	2	626.26	1251.51	0	-2.19	25.83	8058	8058	MS2	0/0	0	0	hala.raw
High	A	2	SEENEEPMETDQNAK	2895	Unambiguous	Heat shock 70 kDa protein 4 OS=Homo sapiens OX=9606 GN=HSPA4 PE=1 SV=4 - [HSP74_HUMAN]	1	1	P34932		HCD	1	0	1	1	0	1.37e-05	12	13	2.68	0	15	60	3680000	2	875.855	1750.7	0	-2.36	25.83	8059	8059	MS2	0/0	0	0	hala.raw
High	A	2	NcTYTQVQTR	2897	Unambiguous	Transcription elongation factor A protein 2 OS=Homo sapiens OX=9606 GN=TCEA2 PE=1 SV=1 - [TCEA2_HUMAN]	2	1	Q15560	C2(Carbamidomethyl)	HCD	1	0	1	1	0	0.00124	90	77	1.84	0	61	60	2010000	2	635.794	1270.58	0	-3.53	25.83	8060	8060	MS2	0/0	0	0	hala.raw
High	A	2	YTAQVDAEEK	2899	Unambiguous	ATP synthase subunit d, mitochondrial OS=Homo sapiens OX=9606 GN=ATP5PD PE=1 SV=3 - [ATP5H_HUMAN]	1	1	O75947		HCD	1	0	1	1	0	0.000678	98	99	1.61	0	24	31	8700000	2	577.271	1153.53	0	-2.15	25.84	8062	8062	MS2	0/0	0	0	hala.raw
High	A	2	AVTEQGHELSNEER	2348	Unambiguous	14-3-3 protein beta/alpha OS=Homo sapiens OX=9606 GN=YWHAB PE=1 SV=3 - [1433B_HUMAN]	1	1	P31946		HCD	1	0	1	1	0	1.97e-07	113	123	3.01	0	0	60	4330000	2	799.872	1598.74	0	-2.93	25.84	8063	8063	MS2	0/0	0	0	hala.raw
High	A	2	ALGQAASDNSGPEDAK	2907	Unambiguous	Nodal modulator 1 OS=Homo sapiens OX=9606 GN=NOMO1 PE=1 SV=5 - [NOMO1_HUMAN]	1	1	Q15155		HCD	1	0	1	1	0	1.28e-05	93	94	2.27	0	0	60	1500000	2	765.855	1530.7	0	-0.14	25.85	8067	8067	MS2	0/0	0	0	hala.raw
High	A	2	RELHGQNPVVTPcNK	2909	Unambiguous	Cleavage and polyadenylation specificity factor subunit 6 OS=Homo sapiens OX=9606 GN=CPSF6 PE=1 SV=2 - [CPSF6_HUMAN]	1	1	Q16630	C13(Carbamidomethyl)	HCD	1	0	1	1	0	6.94e-05	224	238	2.89	1	59	60	1730000	3	583.633	1748.88	0	-1.6	25.85	8068	8068	MS2	0/0	0	0	hala.raw
High	A	2	EGIPPDQQR	1944	Unambiguous	Ubiquitin-40S ribosomal protein S27a OS=Homo sapiens OX=9606 GN=RPS27A PE=1 SV=2 - [RS27A_HUMAN]	4	1	P62979		HCD	1	0	1	1	0.002	0.0239	189	185	1.55	0	22	24	11300000	2	520.261	1039.51	0	-1.86	25.85	8069	8069	MS2	0/0	0	0	hala.raw
High	A	2	VTHETSAHEGQTEAPSIDEK	2915	Unambiguous	Ubiquitin carboxyl-terminal hydrolase isozyme L3 OS=Homo sapiens OX=9606 GN=UCHL3 PE=1 SV=1 - [UCHL3_HUMAN]	1	1	P15374		HCD	1	0	1	1	0	0.000762	100	97	2.63	0	34	49	3760000	4	542.253	2165.99	0	-1.29	25.86	8071	8071	MS2	0/0	0	0	hala.raw
High	A	2	VTHETSAHEGQTEAPSIDEK	2915	Unambiguous	Ubiquitin carboxyl-terminal hydrolase isozyme L3 OS=Homo sapiens OX=9606 GN=UCHL3 PE=1 SV=1 - [UCHL3_HUMAN]	1	1	P15374		HCD	1	0	1	1	0	0.00551	98	97	2.27	0	0	60	3550000	3	722.668	2165.99	0	-2.52	25.86	8072	8072	MS2	0/0	0	0	hala.raw
High	A	2	MQEQQADLQR	2919	Unambiguous	Dynactin subunit 1 OS=Homo sapiens OX=9606 GN=DCTN1 PE=1 SV=3 - [DCTN1_HUMAN]	1	1	Q14203		HCD	1	0	1	1	0	0.000391	89	88	1.82	0	4	60	2750000	2	623.794	1246.58	0	-2.94	25.86	8073	8073	MS2	0/0	0	0	hala.raw
High	A	2	SDAEEDGGTVSQEEEDR	2926	Unambiguous	Calnexin OS=Homo sapiens OX=9606 GN=CANX PE=1 SV=2 - [CALX_HUMAN]	1	1	P27824		HCD	1	0	1	1	0	0.000133	7	7	1.63	0	0	60	701000	2	926.867	1852.73	0	-2.5	25.86	8076	8076	MS2	0/0	0	0	hala.raw
High	A	2	cEMEQQNQEYK	2005	Unambiguous	Keratin, type I cytoskeletal 17 OS=Homo sapiens OX=9606 GN=KRT17 PE=1 SV=2 - [K1C17_HUMAN]	2	1	Q04695	C1(Carbamidomethyl)	HCD	1	0	1	1	0	1.34e-05	10	20	2.82	0	4	19	23700000	2	743.799	1486.59	0	-2.43	25.87	8078	8078	MS2	0/0	0	0	hala.raw
High	A	2	TQDPSSPGTTPPQAR	2930	Unambiguous	Chromatin assembly factor 1 subunit B OS=Homo sapiens OX=9606 GN=CHAF1B PE=1 SV=1 - [CAF1B_HUMAN]	1	1	Q13112		HCD	1	0	1	1	0.005	0.0706	144	162	1.62	0	55	60	503000	2	770.369	1539.73	0	-6.06	25.87	8079	8079	MS2	0/0	0	0	hala.raw
High	A	2	VDcTAHSDVcSAQGVR	2934	Unambiguous	Thioredoxin domain-containing protein 5 OS=Homo sapiens OX=9606 GN=TXNDC5 PE=1 SV=2 - [TXND5_HUMAN]	1	1	Q8NBS9	C3(Carbamidomethyl); C10(Carbamidomethyl)	HCD	1	0	1	1	0	4.1e-06	37	34	2.9	0	9	42	9920000	3	587.926	1761.76	0	-0.9	25.87	8081	8081	MS2	0/0	0	0	hala.raw
High	A	2	AQGPQQQPGSEGPSYAK	2938	Unambiguous	Mitochondrial import inner membrane translocase subunit TIM50 OS=Homo sapiens OX=9606 GN=TIMM50 PE=1 SV=2 - [TIM50_HUMAN]	1	1	Q3ZCQ8		HCD	1	0	1	1	0	0.00401	121	126	1.09	0	20	60	1380000	2	865.409	1729.81	0	-2.5	25.88	8083	8083	MS2	0/0	0	0	hala.raw
High	A	2	VAPAQPSEEGPGR	2422	Unambiguous	Eukaryotic translation initiation factor 4B OS=Homo sapiens OX=9606 GN=EIF4B PE=1 SV=2 - [IF4B_HUMAN]	1	1	P23588		HCD	1	0	1	1	0	5.33e-05	176	203	2.13	0	20	60	6050000	2	647.822	1294.64	0	-1.86	25.89	8086	8086	MS2	0/0	0	0	hala.raw
High	A	2	NIDEHANEDVER	2418	Unambiguous	Ras-related protein Rab-10 OS=Homo sapiens OX=9606 GN=RAB10 PE=1 SV=1 - [RAB10_HUMAN]	1	1	P61026		HCD	1	0	1	1	0	2.92e-05	54	53	2.6	0	55	60	2220000	3	480.882	1440.63	0	-1.5	25.89	8087	8087	MS2	0/0	0	0	hala.raw
High	A	2	NYYQDTPK	2946	Unambiguous	Nucleolar protein 16 OS=Homo sapiens OX=9606 GN=NOP16 PE=1 SV=2 - [NOP16_HUMAN]	1	1	Q9Y3C1		HCD	1	0	1	1	0.003	0.0362	57	61	1.42	0	58	60	2410000	2	514.736	1028.47	0	-2.9	25.89	8089	8089	MS2	0/0	0	0	hala.raw
High	A	2	LAQLAGDHEcGSSSQR	2950	Unambiguous	Inner nuclear membrane protein Man1 OS=Homo sapiens OX=9606 GN=LEMD3 PE=1 SV=2 - [MAN1_HUMAN]	1	1	Q9Y2U8	C10(Carbamidomethyl)	HCD	1	0	1	1	0	0.000684	80	78	2.02	0	35	60	1590000	3	572.596	1715.77	0	-2.28	25.89	8091	8091	MS2	0/0	0	0	hala.raw
High	A	2	LEScGVTSDNcR	2394	Unambiguous	Ribonuclease inhibitor OS=Homo sapiens OX=9606 GN=RNH1 PE=1 SV=2 - [RINI_HUMAN]	1	1	P13489	C4(Carbamidomethyl); C11(Carbamidomethyl)	HCD	1	0	1	1	0	0.00253	22	19	1.59	0	21	60	1730000	2	699.292	1397.58	0	-1.77	25.9	8095	8095	MS2	0/0	0	0	hala.raw
High	A	2	SSPSGPSNPSNPSVEEK	2965	Unambiguous	BRI3-binding protein OS=Homo sapiens OX=9606 GN=BRI3BP PE=1 SV=1 - [BRI3B_HUMAN]	1	1	Q8WY22		HCD	1	0	1	1	0	0.00766	74	77	1.39	0	59	60	815000	2	850.388	1699.77	0	-5.1	25.9	8098	8098	MS2	0/0	0	0	hala.raw
High	A	2	DSYVGDEAQSK	2007	Unambiguous	Actin, alpha cardiac muscle 1 OS=Homo sapiens OX=9606 GN=ACTC1 PE=1 SV=1 - [ACTC_HUMAN]|Actin, cytoplasmic 1 OS=Homo sapiens OX=9606 GN=ACTB PE=1 SV=1 - [ACTB_HUMAN]	6	2	P68032;P60709		HCD	1	0	1	1	0	0.00645	53	54	1.31	0	0	1	249000000	2	599.764	1198.52	0	-1.75	25.92	8103	8103	MS2	0/0	0	0	hala.raw
High	A	2	NYQQNYQNSESGEK	2027	Unambiguous	Nuclease-sensitive element-binding protein 1 OS=Homo sapiens OX=9606 GN=YBX1 PE=1 SV=3 - [YBOX1_HUMAN]	1	1	P67809		HCD	1	0	1	1	0	2.74e-06	28	34	2.85	0	0	60	7160000	2	844.859	1688.71	0	-2.35	25.92	8104	8104	MS2	0/0	0	0	hala.raw
High	A	2	RDPALNSGVSQKPDPAK	2980	Unambiguous	DNA topoisomerase 2-alpha OS=Homo sapiens OX=9606 GN=TOP2A PE=1 SV=3 - [TOP2A_HUMAN]	1	1	P11388		HCD	1	0	1	1	0	0.000369	184	194	2.94	1	49	45	4640000	3	593.983	1779.93	0	-0.6	25.93	8110	8110	MS2	0/0	0	0	hala.raw
Middle	A	2	YVLHcQGTEEEK	2982	Unambiguous	Eukaryotic peptide chain release factor subunit 1 OS=Homo sapiens OX=9606 GN=ETF1 PE=1 SV=3 - [ERF1_HUMAN]	1	1	P62495	C5(Carbamidomethyl)	HCD	1	0	1	1	0.012	0.164	73	78	1.06	0	40	60	2480000	3	498.228	1492.67	0	-3.42	25.93	8111	8111	MS2	0/0	0	0	hala.raw
High	A	2	EEPSQNDISPK	2984	Unambiguous	Nucleolar RNA helicase 2 OS=Homo sapiens OX=9606 GN=DDX21 PE=1 SV=5 - [DDX21_HUMAN]	1	1	Q9NR30		HCD	1	0	1	1	0.001	0.0138	77	88	1.42	0	45	60	1650000	2	622.29	1243.57	0	-5.31	25.93	8112	8112	MS2	0/0	0	0	hala.raw
High	A	2	QNQTTSAVSTPASSETSK	2992	Unambiguous	E3 SUMO-protein ligase RanBP2 OS=Homo sapiens OX=9606 GN=RANBP2 PE=1 SV=2 - [RBP2_HUMAN]	1	1	P49792		HCD	1	0	1	1	0	0.00227	136	146	1.66	0	0	60	624000	2	912.434	1823.86	0	-1.1	25.94	8116	8116	MS2	0/0	0	0	hala.raw
High	A	2	TEAPAAPAAQETK	2424	Unambiguous	Brain acid soluble protein 1 OS=Homo sapiens OX=9606 GN=BASP1 PE=1 SV=2 - [BASP1_HUMAN]	1	1	P80723		HCD	1	0	1	1	0	0.000199	147	157	1.86	0	42	60	2290000	2	642.824	1284.64	0	-1.88	25.95	8120	8120	MS2	0/0	0	0	hala.raw
High	A	2	ATYDGNHDTFR	3002	Unambiguous	ER lumen protein-retaining receptor 1 OS=Homo sapiens OX=9606 GN=KDELR1 PE=1 SV=1 - [ERD21_HUMAN]	2	1	P24390		HCD	1	0	1	1	0	0.00447	50	41	1.37	0	34	60	937000	3	432.858	1296.56	0	-0.65	25.95	8121	8121	MS2	0/0	0	0	hala.raw
Middle	A	2	QSPGSTSPKPPHTLSR	3004	Unambiguous	Ribosomal RNA-processing protein 8 OS=Homo sapiens OX=9606 GN=RRP8 PE=1 SV=2 - [RRP8_HUMAN]	1	1	O43159		HCD	1	0	1	1	0.025	0.288	261	236	1.1	0	22	60	557000	4	419.972	1676.87	0	-2.14	25.95	8122	8122	MS2	0/0	0	0	hala.raw
High	A	2	EIQTAVR	2495	Unambiguous	Histone H2B type 1-J OS=Homo sapiens OX=9606 GN=HIST1H2BJ PE=1 SV=3 - [H2B1J_HUMAN]|Histone H2B type 1-K OS=Homo sapiens OX=9606 GN=HIST1H2BK PE=1 SV=3 - [H2B1K_HUMAN]	14	2	P06899;O60814		HCD	1	0	1	1	0.006	0.0828	237	216	1.45	0	56	60	1170000	2	408.732	816.456	0	-1.85	25.96	8125	8125	MS2	0/0	0	0	hala.raw
High	A	2	APKPDGPGGGPGGSHMGGNYGDDR	1814	Unambiguous	RNA-binding protein FUS OS=Homo sapiens OX=9606 GN=FUS PE=1 SV=1 - [FUS_HUMAN]	1	1	P35637		HCD	1	0	1	1	0	0.00168	23	27	2.97	0	6	28	8100000	4	563.999	2252.97	0	-0.71	25.97	8129	8129	MS2	0/0	0	0	hala.raw
High	A	2	TDAPQPDVKEEEEEKEEEK	3014	Unambiguous	Calnexin OS=Homo sapiens OX=9606 GN=CANX PE=1 SV=2 - [CALX_HUMAN]	1	1	P27824		HCD	1	0	1	1	0	0.00981	81	87	3.55	2	18	60	6730000	3	753.675	2259.01	0	-1.53	25.97	8130	8130	MS2	0/0	0	0	hala.raw
High	A	2	MEELHNQEMQK	3020	Unambiguous	Splicing factor, proline- and glutamine-rich OS=Homo sapiens OX=9606 GN=SFPQ PE=1 SV=2 - [SFPQ_HUMAN]	1	1	P23246		HCD	1	0	1	1	0	0.00419	63	55	2.33	0	15	60	2190000	2	708.816	1416.63	0	0.52	25.97	8133	8133	MS2	0/0	0	0	hala.raw
High	A	2	TLDTGETPSETK	3024	Unambiguous	CCR4-NOT transcription complex subunit 11 OS=Homo sapiens OX=9606 GN=CNOT11 PE=1 SV=1 - [CNO11_HUMAN]	1	1	Q9UKZ1		HCD	1	0	1	1	0	0.000304	146	145	2.04	0	0	60	1060000	2	639.807	1278.61	0	0.94	25.98	8135	8135	MS2	0/0	0	0	hala.raw
High	A	2	VFDPQNDKPSK	3026	Unambiguous	Actin-related protein 2/3 complex subunit 3 OS=Homo sapiens OX=9606 GN=ARPC3 PE=1 SV=3 - [ARPC3_HUMAN]	1	1	O15145		HCD	1	0	1	1	0.004	0.0515	181	190	1.19	0	44	60	583000	3	425.55	1274.64	0	-1.65	25.98	8136	8136	MS2	0/0	0	0	hala.raw
High	A	2	MEELHNQEMQK	3020	Unambiguous	Splicing factor, proline- and glutamine-rich OS=Homo sapiens OX=9606 GN=SFPQ PE=1 SV=2 - [SFPQ_HUMAN]	1	1	P23246		HCD	1	0	1	1	0	0.0103	66	52	1.85	0	27	48	6950000	3	472.88	1416.62	0	-0.03	25.98	8137	8137	MS2	0/0	0	0	hala.raw
High	A	2	LPDAHSDYAR	3032	Unambiguous	RNA-binding protein 14 OS=Homo sapiens OX=9606 GN=RBM14 PE=1 SV=2 - [RBM14_HUMAN]	1	1	Q96PK6		HCD	1	0	1	1	0	0.000928	81	79	1.41	0	36	60	498000	3	382.184	1144.54	0	-0.6	25.99	8141	8141	MS2	0/0	0	0	hala.raw
High	A	2	ENQQATSGPNQPSVR	2078	Unambiguous	Y-box-binding protein 3 OS=Homo sapiens OX=9606 GN=YBX3 PE=1 SV=4 - [YBOX3_HUMAN]	1	1	P16989		HCD	1	0	1	1	0	2.38e-06	138	138	2.76	0	22	60	3170000	2	806.885	1612.76	0	-2.54	26	8147	8147	MS2	0/0	0	0	hala.raw
High	A	2	APKPDGPGGGPGGSHMGGNYGDDR	1814	Unambiguous	RNA-binding protein FUS OS=Homo sapiens OX=9606 GN=FUS PE=1 SV=1 - [FUS_HUMAN]	1	1	P35637		HCD	1	0	1	1	0	5.06e-09	26	29	5.11	0	17	60	10400000	3	751.661	2252.97	0	-2.16	26	8149	8149	MS2	0/0	0	0	hala.raw
High	A	2	VPASQPRPESKPESQIPPQRPQR	2976	Unambiguous	Ras GTPase-activating protein-binding protein 1 OS=Homo sapiens OX=9606 GN=G3BP1 PE=1 SV=1 - [G3BP1_HUMAN]	1	1	Q13283		HCD	1	0	1	1	0	0.000496	135	140	3	0	12	60	4380000	5	522.683	2609.39	0	-1.55	26	8150	8150	MS2	0/0	0	0	hala.raw
High	A	2	SDEGQLSPATR	3050	Unambiguous	Plectin OS=Homo sapiens OX=9606 GN=PLEC PE=1 SV=3 - [PLEC_HUMAN]	1	1	Q15149		HCD	1	0	1	1	0	0.000249	98	109	2.05	0	29	60	4000000	2	580.78	1160.55	0	-1.59	26.01	8153	8153	MS2	0/0	0	0	hala.raw
High	A	2	EEADENYNSVNTR	3063	Unambiguous	Syntaxin-4 OS=Homo sapiens OX=9606 GN=STX4 PE=1 SV=2 - [STX4_HUMAN]	1	1	Q12846		HCD	1	0	1	1	0	0.00528	39	28	1.19	0	46	60	1190000	2	770.827	1540.65	0	-2.23	26.02	8160	8160	MS2	0/0	0	0	hala.raw
High	A	2	AFHNEAQVNPER	3065	Unambiguous	T-complex protein 1 subunit alpha OS=Homo sapiens OX=9606 GN=TCP1 PE=1 SV=1 - [TCPA_HUMAN]	1	1	P17987		HCD	1	0	1	1	0	5.49e-05	115	120	2.91	0	3	17	22900000	3	471.228	1411.67	0	-0.84	26.03	8163	8163	MS2	0/0	0	0	hala.raw
High	A	2	ATcAPQHGAPGPGPADASK	1942	Unambiguous	Filamin-A OS=Homo sapiens OX=9606 GN=FLNA PE=1 SV=4 - [FLNA_HUMAN]	1	1	P21333	C3(Carbamidomethyl)	HCD	1	0	1	1	0.002	0.0267	123	123	1.18	0	10	60	864000	2	895.419	1789.83	0	1.41	26.03	8164	8164	MS2	0/0	0	0	hala.raw
High	A	2	ATAPQTQHVSPMR	3073	Unambiguous	Elongation factor 1-delta OS=Homo sapiens OX=9606 GN=EEF1D PE=1 SV=5 - [EF1D_HUMAN]	1	1	P29692		HCD	1	0	1	1	0	7.49e-06	198	208	2.48	0	10	36	8610000	3	475.242	1423.71	0	0.75	26.04	8168	8168	MS2	0/0	0	0	hala.raw
High	A	2	SGSMDPSGAHPSVR	3075	Unambiguous	KH domain-containing, RNA-binding, signal transduction-associated protein 1 OS=Homo sapiens OX=9606 GN=KHDRBS1 PE=1 SV=1 - [KHDR1_HUMAN]	1	1	Q07666		HCD	1	0	1	1	0	1.93e-06	80	65	2.53	0	34	40	6350000	3	462.214	1384.63	0	0.03	26.04	8169	8169	MS2	0/0	0	0	hala.raw
High	A	2	DAQHYGGWEHR	3079	Unambiguous	Neutral alpha-glucosidase AB OS=Homo sapiens OX=9606 GN=GANAB PE=1 SV=3 - [GANAB_HUMAN]	1	1	Q14697		HCD	1	0	1	1	0	0.000108	35	33	2.05	0	35	36	7420000	3	452.534	1355.59	0	-0.47	26.04	8171	8171	MS2	0/0	0	0	hala.raw
High	A	2	HDWDYcEHR	3089	Unambiguous	NADH dehydrogenase [ubiquinone] 1 beta subcomplex subunit 7 OS=Homo sapiens OX=9606 GN=NDUFB7 PE=1 SV=4 - [NDUB7_HUMAN]	1	1	P17568	C6(Carbamidomethyl)	HCD	1	0	1	1	0	0.00021	1	2	1.75	0	33	60	1360000	3	439.84	1317.51	0	-0.52	26.05	8176	8176	MS2	0/0	0	0	hala.raw
Middle	A	2	GWENHVEGQK	3093	Unambiguous	Cytoplasmic dynein 1 heavy chain 1 OS=Homo sapiens OX=9606 GN=DYNC1H1 PE=1 SV=5 - [DYHC1_HUMAN]	1	1	Q14204		HCD	1	0	1	1	0.01	0.138	83	74	1.19	0	33	60	558000	3	395.187	1183.55	0	-2.45	26.05	8178	8178	MS2	0/0	0	0	hala.raw
High	A	2	QPPTAAGRPVDASPR	3099	Unambiguous	Cytoplasmic dynein 1 light intermediate chain 1 OS=Homo sapiens OX=9606 GN=DYNC1LI1 PE=1 SV=3 - [DC1L1_HUMAN]	1	1	Q9Y6G9		HCD	1	0	1	1	0	0.00615	230	210	1.95	0	68	60	1030000	3	507.271	1519.8	0	1	26.06	8181	8181	MS2	0/0	0	0	hala.raw
High	A	2	QVHPDTGISSK	1802	Unambiguous	Histone H2B type 1-J OS=Homo sapiens OX=9606 GN=HIST1H2BJ PE=1 SV=3 - [H2B1J_HUMAN]|Histone H2B type 1-K OS=Homo sapiens OX=9606 GN=HIST1H2BK PE=1 SV=3 - [H2B1K_HUMAN]	15	2	P06899;O60814		HCD	1	0	1	1	0.001	0.0185	156	149	1.47	0	42	60	1310000	3	390.202	1168.59	0	-4.14	26.07	8189	8189	MS2	0/0	0	0	hala.raw
High	A	2	SENEPIENEAAK	3123	Unambiguous	Succinate--CoA ligase [GDP-forming] subunit beta, mitochondrial OS=Homo sapiens OX=9606 GN=SUCLG2 PE=1 SV=2 - [SUCB2_HUMAN]	1	1	Q96I99		HCD	1	0	1	1	0	0.00258	67	60	1.7	0	62	60	3420000	2	665.807	1330.61	0	-3.63	26.08	8195	8195	MS2	0/0	0	0	hala.raw
High	A	2	ADAEGESDLENSR	3125	Unambiguous	Talin-1 OS=Homo sapiens OX=9606 GN=TLN1 PE=1 SV=3 - [TLN1_HUMAN]	1	1	Q9Y490		HCD	1	0	1	1	0	2.22e-06	33	29	2.02	0	34	60	1480000	2	696.796	1392.58	0	-2.27	26.08	8196	8196	MS2	0/0	0	0	hala.raw
High	A	2	NQGGYGGSSSSSSYGSGR	1600	Unambiguous	Heterogeneous nuclear ribonucleoprotein A1 OS=Homo sapiens OX=9606 GN=HNRNPA1 PE=1 SV=5 - [ROA1_HUMAN]	1	1	P09651		HCD	1	0	1	1	0	7.76e-12	13	9	3.66	0	1	14	28500000	2	847.852	1694.7	0	-1.67	26.09	8200	8200	MS2	0/0	0	0	hala.raw
High	A	2	LPDAHSDYAR	3032	Unambiguous	RNA-binding protein 14 OS=Homo sapiens OX=9606 GN=RBM14 PE=1 SV=2 - [RBM14_HUMAN]	1	1	Q96PK6		HCD	1	0	1	1	0	0.0017	98	91	1.73	0	29	60	1880000	2	572.773	1144.54	0	0.05	26.1	8206	8206	MS2	0/0	0	0	hala.raw
High	A	2	YLHDESGLNR	3150	Unambiguous	Septin-2 OS=Homo sapiens OX=9606 GN=SEPT2 PE=1 SV=1 - [SEPT2_HUMAN]	1	1	Q15019		HCD	1	0	1	1	0	0.000641	118	121	1.69	0	59	60	1070000	3	401.863	1203.58	0	-0.09	26.11	8208	8208	MS2	0/0	0	0	hala.raw
High	A	2	QEAGISEGQGTAGEEEEK	3156	Unambiguous	Density-regulated protein OS=Homo sapiens OX=9606 GN=DENR PE=1 SV=2 - [DENR_HUMAN]	1	1	O43583		HCD	1	0	1	1	0	0.00108	53	47	1.68	0	0	60	598000	2	924.904	1848.8	0	-4.54	26.11	8211	8211	MS2	0/0	0	0	hala.raw
High	A	2	AFHNEAQVNPER	3065	Unambiguous	T-complex protein 1 subunit alpha OS=Homo sapiens OX=9606 GN=TCP1 PE=1 SV=1 - [TCPA_HUMAN]	1	1	P17987		HCD	1	0	1	1	0	4.33e-05	115	116	2.31	0	48	60	4800000	2	706.339	1411.67	0	-0.47	26.12	8213	8213	MS2	0/0	0	0	hala.raw
Middle	A	2	LQSIGTENTEENRR	3162	Unambiguous	Fructose-bisphosphate aldolase A OS=Homo sapiens OX=9606 GN=ALDOA PE=1 SV=2 - [ALDOA_HUMAN]	1	1	P04075		HCD	1	0	1	1	0.029	0.329	164	202	1.95	1	16	29	14500000	3	549.608	1646.81	0	-0.31	26.13	8216	8216	MS2	0/0	0	0	hala.raw
High	A	2	KPLTSSSAAPQRPISTQR	3166	Unambiguous	Microtubule-associated protein RP/EB family member 1 OS=Homo sapiens OX=9606 GN=MAPRE1 PE=1 SV=3 - [MARE1_HUMAN]	1	1	Q15691		HCD	1	0	1	1	0	0.000128	140	146	3.15	0	31	60	3780000	3	642.356	1925.05	0	-1.4	26.13	8218	8218	MS2	0/0	0	0	hala.raw
High	A	2	VGGTSDVEVNEK	3168	Unambiguous	60 kDa heat shock protein, mitochondrial OS=Homo sapiens OX=9606 GN=HSPD1 PE=1 SV=2 - [CH60_HUMAN]	1	1	P10809		HCD	1	0	1	1	0	7.24e-06	145	139	2.42	0	12	9	41000000	2	617.301	1233.59	0	-0.73	26.13	8219	8219	MS2	0/0	0	0	hala.raw
High	A	2	LYTSAPNTSQGK	3179	Unambiguous	Deoxynucleotidyltransferase terminal-interacting protein 2 OS=Homo sapiens OX=9606 GN=DNTTIP2 PE=1 SV=2 - [TDIF2_HUMAN]	1	1	Q5QJE6		HCD	1	0	1	1	0	6.42e-05	169	171	2.09	0	18	60	1770000	2	633.819	1266.63	0	-1.54	26.14	8224	8224	MS2	0/0	0	0	hala.raw
High	A	2	HLGYKPEEYK	3181	Unambiguous	Unconventional myosin-Ic OS=Homo sapiens OX=9606 GN=MYO1C PE=1 SV=4 - [MYO1C_HUMAN]	1	1	O00159		HCD	1	0	1	1	0.008	0.114	204	237	1.23	0	31	60	1660000	3	421.883	1263.64	0	-1.18	26.14	8225	8225	MS2	0/0	0	0	hala.raw
High	A	2	EVAEAATGEDASSPPPK	3183	Unambiguous	Synaptic vesicle membrane protein VAT-1 homolog OS=Homo sapiens OX=9606 GN=VAT1 PE=1 SV=2 - [VAT1_HUMAN]	1	1	Q99536		HCD	1	0	1	1	0.001	0.0222	125	128	1.13	0	16	60	1530000	2	828.392	1655.78	0	0.7	26.14	8226	8226	MS2	0/0	0	0	hala.raw
High	A	2	QDPQLHPEDPERR	3185	Unambiguous	39S ribosomal protein L28, mitochondrial OS=Homo sapiens OX=9606 GN=MRPL28 PE=1 SV=4 - [RM28_HUMAN]	1	1	Q13084		HCD	1	0	1	1	0.004	0.0548	150	150	1.41	1	33	60	1510000	3	539.598	1616.78	0	0.71	26.14	8227	8227	MS2	0/0	0	0	hala.raw
High	A	2	DPAEGDGAQPEETPR	2690	Unambiguous	Neutral alpha-glucosidase AB OS=Homo sapiens OX=9606 GN=GANAB PE=1 SV=3 - [GANAB_HUMAN]	1	1	Q14697		HCD	1	0	1	1	0	1.48e-08	47	52	3.64	0	3	60	6370000	2	784.843	1568.68	0	-2.1	26.16	8235	8235	MS2	0/0	0	0	hala.raw
High	A	2	TQASSSFQDSSQPAGK	2684	Unambiguous	Probable 28S rRNA (cytosine(4447)-C(5))-methyltransferase OS=Homo sapiens OX=9606 GN=NOP2 PE=1 SV=2 - [NOP2_HUMAN]	1	1	P46087		HCD	1	0	1	1	0.008	0.118	84	101	0.98	0	0	60	1040000	2	813.374	1625.74	0	-0.27	26.16	8236	8236	MS2	0/0	0	0	hala.raw
High	A	2	MDETDASSAVK	3206	Unambiguous	TAR DNA-binding protein 43 OS=Homo sapiens OX=9606 GN=TARDBP PE=1 SV=1 - [TADBP_HUMAN]	1	1	Q13148		HCD	1	0	1	1	0	1.17e-05	50	57	2.39	0	56	23	5800000	2	577.255	1153.5	0	-0.54	26.17	8238	8238	MS2	0/0	0	0	hala.raw
High	A	2	KPLTSSSAAPQRPISTQR	3166	Unambiguous	Microtubule-associated protein RP/EB family member 1 OS=Homo sapiens OX=9606 GN=MAPRE1 PE=1 SV=3 - [MARE1_HUMAN]	1	1	Q15691		HCD	1	0	1	1	0	0.00215	130	139	2.82	0	16	49	3980000	4	482.02	1925.06	0	-0.04	26.17	8239	8239	MS2	0/0	0	0	hala.raw
High	A	2	VAEVEGEQVDNK	3214	Unambiguous	Mitochondrial proton/calcium exchanger protein OS=Homo sapiens OX=9606 GN=LETM1 PE=1 SV=1 - [LETM1_HUMAN]	1	1	O95202		HCD	1	0	1	1	0	8.77e-05	144	148	2.24	0	28	60	3440000	2	658.82	1316.63	0	-0.51	26.17	8242	8242	MS2	0/0	0	0	hala.raw
High	A	2	LDGEASINNR	3219	Unambiguous	Activator of 90 kDa heat shock protein ATPase homolog 1 OS=Homo sapiens OX=9606 GN=AHSA1 PE=1 SV=1 - [AHSA1_HUMAN]	1	1	O95433		HCD	1	0	1	1	0.001	0.0216	144	150	1.79	0	48	60	2230000	2	544.771	1088.53	0	0.89	26.17	8244	8244	MS2	0/0	0	0	hala.raw
High	A	2	cNTcGEPITDR	3223	Unambiguous	Zyxin OS=Homo sapiens OX=9606 GN=ZYX PE=1 SV=1 - [ZYX_HUMAN]	1	1	Q15942	C1(Carbamidomethyl); C4(Carbamidomethyl)	HCD	1	0	1	1	0	0.00967	20	14	2.15	0	45	60	1540000	2	661.774	1322.54	0	-4.51	26.18	8246	8246	MS2	0/0	0	0	hala.raw
High	A	2	SNIHcNTIAPNAGSR	3227	Unambiguous	Peroxisomal multifunctional enzyme type 2 OS=Homo sapiens OX=9606 GN=HSD17B4 PE=1 SV=3 - [DHB4_HUMAN]	1	1	P51659	C5(Carbamidomethyl)	HCD	1	0	1	1	0	0.00127	126	143	2.46	0	40	58	7120000	3	537.927	1611.77	0	0.37	26.18	8248	8248	MS2	0/0	0	0	hala.raw
High	A	2	EIESSPQYR	3229	Unambiguous	Ataxin-2-like protein OS=Homo sapiens OX=9606 GN=ATXN2L PE=1 SV=2 - [ATX2L_HUMAN]	1	1	Q8WWM7		HCD	1	0	1	1	0	0.00489	147	121	1.71	0	51	60	2650000	2	554.767	1108.53	0	-0.05	26.18	8249	8249	MS2	0/0	0	0	hala.raw
High	A	2	ISGSGSNSDMMENSK	3241	Unambiguous	Transcriptional regulator ATRX OS=Homo sapiens OX=9606 GN=ATRX PE=1 SV=5 - [ATRX_HUMAN]	1	1	P46100		HCD	1	0	1	1	0.007	0.0961	31	22	0.71	0	17	60	545000	2	772.323	1543.64	0	1.44	26.19	8255	8255	MS2	0/0	0	0	hala.raw
Middle	A	2	SDTSSEMFTQcVFcR	3243	Unambiguous	WD repeat-containing protein 88 OS=Homo sapiens OX=9606 GN=WDR88 PE=2 SV=2 - [WDR88_HUMAN]	1	1	Q6ZMY6	C11(Carbamidomethyl); C14(Carbamidomethyl)	HCD	1	0	1	1	0.027	0.31	12	9	0.6	0	57	60	537000	2	927.874	1854.74	0	-2.21	26.19	8256	8256	MS2	0/0	0	0	hala.raw
High	A	2	ESEPQAAAEPAEAK	2735	Unambiguous	Brain acid soluble protein 1 OS=Homo sapiens OX=9606 GN=BASP1 PE=1 SV=2 - [BASP1_HUMAN]	1	1	P80723		HCD	1	0	1	1	0	4.93e-05	93	102	1.72	0	10	25	17300000	2	714.336	1427.66	0	-0.08	26.2	8259	8259	MS2	0/0	0	0	hala.raw
High	A	2	IEGDETSTEAATR	2163	Unambiguous	DNA-directed RNA polymerases I, II, and III subunit RPABC3 OS=Homo sapiens OX=9606 GN=POLR2H PE=1 SV=4 - [RPAB3_HUMAN]	1	1	P52434		HCD	1	0	1	1	0	9.7e-06	84	100	2.19	0	16	60	2060000	2	690.317	1379.63	0	-0.78	26.21	8263	8263	MS2	0/0	0	0	hala.raw
Middle	A	2	DAVTYTEHAK	2055	Unambiguous	Histone H4 OS=Homo sapiens OX=9606 GN=HIST1H4A PE=1 SV=2 - [H4_HUMAN]	1	1	P62805		HCD	1	0	1	1	0.013	0.179	149	146	0.93	0	22	60	886000	3	378.852	1134.54	0	-0.89	26.21	8264	8264	MS2	0/0	0	0	hala.raw
High	A	2	EAVVQEPER	3261	Unambiguous	Probable ATP-dependent RNA helicase DDX27 OS=Homo sapiens OX=9606 GN=DDX27 PE=1 SV=2 - [DDX27_HUMAN]	1	1	Q96GQ7		HCD	1	0	1	1	0	0.00957	139	144	1.77	0	38	60	2070000	2	528.769	1056.53	0	-0.5	26.21	8265	8265	MS2	0/0	0	0	hala.raw
High	A	2	EDKYEEEIK	3293	Unambiguous	Tropomyosin alpha-3 chain OS=Homo sapiens OX=9606 GN=TPM3 PE=1 SV=2 - [TPM3_HUMAN]|Tropomyosin alpha-4 chain OS=Homo sapiens OX=9606 GN=TPM4 PE=1 SV=3 - [TPM4_HUMAN]|Tropomyosin beta chain OS=Homo sapiens OX=9606 GN=TPM2 PE=1 SV=1 - [TPM2_HUMAN]	3	3	P06753;P67936;P07951		HCD	1	0	1	1	0.004	0.0613	120	120	1.79	1	18	21	12400000	2	591.781	1182.55	0	1.56	26.24	8283	8283	MS2	0/0	0	0	hala.raw
High	A	2	EENIEDATEK	3295	Unambiguous	High mobility group nucleosome-binding domain-containing protein 5 OS=Homo sapiens OX=9606 GN=HMGN5 PE=1 SV=1 - [HMGN5_HUMAN]	1	1	P82970		HCD	1	0	1	1	0	0.000519	66	61	1.84	0	29	23	11000000	2	589.265	1177.52	0	0.05	26.24	8284	8284	MS2	0/0	0	0	hala.raw
High	A	2	VEQATKPSFESGR	3297	Unambiguous	RNA-binding motif protein, X chromosome OS=Homo sapiens OX=9606 GN=RBMX PE=1 SV=3 - [RBMX_HUMAN]	1	1	P38159		HCD	1	0	1	1	0	0.000221	202	200	2.28	0	38	40	7960000	3	479.243	1435.72	0	-1.44	26.24	8285	8285	MS2	0/0	0	0	hala.raw
High	A	2	MRPGVAcSVSQAQK	3299	Unambiguous	60S ribosomal protein L9 OS=Homo sapiens OX=9606 GN=RPL9 PE=1 SV=1 - [RL9_HUMAN]	1	1	P32969	C7(Carbamidomethyl)	HCD	1	0	1	1	0	0.000345	190	181	3.22	0	18	49	6650000	3	506.922	1518.75	0	-0.91	26.25	8286	8286	MS2	0/0	0	0	hala.raw
High	A	2	AIQGGTSHHLGQNFSK	3301	Unambiguous	Bifunctional glutamate/proline--tRNA ligase OS=Homo sapiens OX=9606 GN=EPRS PE=1 SV=5 - [SYEP_HUMAN]	1	1	P07814		HCD	1	0	1	1	0	0.00618	218	196	2.21	0	29	47	6400000	3	561.284	1681.84	0	-1.09	26.25	8287	8287	MS2	0/0	0	0	hala.raw
High	A	2	MRPGVAcSVSQAQK	3299	Unambiguous	60S ribosomal protein L9 OS=Homo sapiens OX=9606 GN=RPL9 PE=1 SV=1 - [RL9_HUMAN]	1	1	P32969	C7(Carbamidomethyl)	HCD	1	0	1	1	0	0.000105	193	185	3.2	0	15	60	3100000	2	759.878	1518.75	0	-1.92	26.25	8288	8288	MS2	0/0	0	0	hala.raw
High	A	2	VEQATKPSFESGR	3297	Unambiguous	RNA-binding motif protein, X chromosome OS=Homo sapiens OX=9606 GN=RBMX PE=1 SV=3 - [RBMX_HUMAN]	1	1	P38159		HCD	1	0	1	1	0	2.64e-05	202	201	2.32	0	41	60	3080000	2	718.362	1435.72	0	-1.16	26.25	8289	8289	MS2	0/0	0	0	hala.raw
High	A	2	YNHIDESEMK	3307	Unambiguous	Heat shock protein 105 kDa OS=Homo sapiens OX=9606 GN=HSPH1 PE=1 SV=1 - [HS105_HUMAN]	1	1	Q92598		HCD	1	0	1	1	0.007	0.102	53	45	1.58	0	63	60	2590000	2	633.277	1265.55	0	-0.42	26.25	8290	8290	MS2	0/0	0	0	hala.raw
High	A	2	YcDPDSYHR	1887	Unambiguous	Splicing factor U2AF 65 kDa subunit OS=Homo sapiens OX=9606 GN=U2AF2 PE=1 SV=4 - [U2AF2_HUMAN]	1	1	P26368	C2(Carbamidomethyl)	HCD	1	0	1	1	0.008	0.127	11	8	1.27	0	34	60	1270000	3	404.829	1212.47	0	-0.39	26.25	8291	8291	MS2	0/0	0	0	hala.raw
High	A	2	EVVEEAENGR	2307	Unambiguous	Prothymosin alpha OS=Homo sapiens OX=9606 GN=PTMA PE=1 SV=2 - [PTMA_HUMAN]	1	1	P06454		HCD	1	0	1	1	0	2.35e-05	99	106	2.48	0	9	8	36900000	2	566.268	1131.53	0	0.03	26.27	8299	8299	MS2	0/0	0	0	hala.raw
High	A	2	ETPAATEAPSSTPK	2813	Unambiguous	Brain acid soluble protein 1 OS=Homo sapiens OX=9606 GN=BASP1 PE=1 SV=2 - [BASP1_HUMAN]	1	1	P80723		HCD	1	0	1	1	0	6.08e-05	163	149	2.2	0	15	25	16500000	2	693.842	1386.68	0	1.99	26.27	8300	8300	MS2	0/0	0	0	hala.raw
High	A	2	YSGSEGSTQTLTK	2811	Unambiguous	Protein S100-P OS=Homo sapiens OX=9606 GN=S100P PE=1 SV=2 - [S100P_HUMAN]	1	1	P25815		HCD	1	0	1	1	0	1.39e-06	125	128	2.61	0	0	55	8680000	2	679.825	1358.64	0	-0.25	26.27	8301	8301	MS2	0/0	0	0	hala.raw
High	A	2	DcVGPEVEK	3329	Unambiguous	Phosphoglycerate kinase 1 OS=Homo sapiens OX=9606 GN=PGK1 PE=1 SV=3 - [PGK1_HUMAN]	1	1	P00558	C2(Carbamidomethyl)	HCD	1	0	1	1	0.004	0.0564	55	56	1.5	0	28	28	7070000	2	516.737	1032.47	0	0.03	26.27	8302	8302	MS2	0/0	0	0	hala.raw
High	A	2	NKYEDEINKR	2277	Unambiguous	Keratin, type II cytoskeletal 8 OS=Homo sapiens OX=9606 GN=KRT8 PE=1 SV=7 - [K2C8_HUMAN]|Keratin, type II cytoskeletal 6A OS=Homo sapiens OX=9606 GN=KRT6A PE=1 SV=3 - [K2C6A_HUMAN]	6	1	P05787		HCD	1	0	1	1	0	0.0071	194	211	2.16	2	17	41	6160000	3	436.89	1308.65	0	0.21	26.27	8303	8303	MS2	0/0	0	0	hala.raw
High	A	2	VAVTEGcQPSR	2426	Unambiguous	Filamin-B OS=Homo sapiens OX=9606 GN=FLNB PE=1 SV=2 - [FLNB_HUMAN]	1	1	O75369	C7(Carbamidomethyl)	HCD	1	0	1	1	0.004	0.049	135	132	1.45	0	60	22	4290000	2	602.295	1203.58	0	3.92	26.28	8304	8304	MS2	0/0	0	0	hala.raw
High	A	2	SGGGGGGGGcGGGGGVSSLR	3339	Unambiguous	Keratin, type I cytoskeletal 10 OS=Homo sapiens OX=9606 GN=KRT10 PE=1 SV=6 - [K1C10_HUMAN]	1	1	P13645	C10(Carbamidomethyl)	HCD	1	0	1	1	0	2.5e-06	62	52	2.21	0	24	60	1160000	2	775.344	1549.68	0	2.2	26.28	8307	8307	MS2	0/0	0	0	hala.raw
High	A	2	EAAGTTAAAGTGGATEQPPR	3341	Unambiguous	U4/U6.U5 tri-snRNP-associated protein 1 OS=Homo sapiens OX=9606 GN=SART1 PE=1 SV=1 - [SNUT1_HUMAN]	1	1	O43290		HCD	1	0	1	1	0	1.32e-05	146	152	2.3	0	0	60	925000	2	907.438	1813.87	0	0.4	26.28	8308	8308	MS2	0/0	0	0	hala.raw
High	A	2	AVTEQGHELSNEER	2348	Unambiguous	14-3-3 protein beta/alpha OS=Homo sapiens OX=9606 GN=YWHAB PE=1 SV=3 - [1433B_HUMAN]	1	1	P31946		HCD	1	0	1	1	0	1.66e-05	124	137	2.45	0	7	17	20200000	3	533.585	1598.74	0	0.19	26.3	8317	8317	MS2	0/0	0	0	hala.raw
High	A	2	IVQAEGEAEAAK	2837	Unambiguous	Prohibitin-2 OS=Homo sapiens OX=9606 GN=PHB2 PE=1 SV=2 - [PHB2_HUMAN]	1	1	Q99623		HCD	1	0	1	1	0	0.000163	165	178	2.33	0	21	60	5700000	2	608.313	1215.62	0	-1.61	26.3	8319	8319	MS2	0/0	0	0	hala.raw
High	A	2	IAAYGHEVGK	3363	Unambiguous	Kynureninase OS=Homo sapiens OX=9606 GN=KYNU PE=1 SV=1 - [KYNU_HUMAN]	1	1	Q16719		HCD	1	0	1	1	0	0.00216	179	184	1.7	0	69	46	4200000	2	522.777	1044.55	0	-0.14	26.3	8321	8321	MS2	0/0	0	0	hala.raw
High	A	2	WDETPGR	3365	Unambiguous	Splicing factor 3B subunit 1 OS=Homo sapiens OX=9606 GN=SF3B1 PE=1 SV=3 - [SF3B1_HUMAN]	1	1	O75533		HCD	1	0	1	1	0.003	0.0445	54	49	1.33	0	48	47	2960000	2	430.698	860.39	0	-0.28	26.31	8322	8322	MS2	0/0	0	0	hala.raw
High	A	2	YTQSNSVcYAK	2817	Unambiguous	Bifunctional purine biosynthesis protein PURH OS=Homo sapiens OX=9606 GN=ATIC PE=1 SV=3 - [PUR9_HUMAN]	1	1	P31939	C8(Carbamidomethyl)	HCD	1	0	1	1	0.001	0.0207	64	62	1.15	0	22	60	2680000	2	660.798	1320.59	0	-0.72	26.31	8323	8323	MS2	0/0	0	0	hala.raw
High	A	2	LQQQQRPEDAEDGAEGGGK	1934	Unambiguous	tRNA (cytosine(34)-C(5))-methyltransferase OS=Homo sapiens OX=9606 GN=NSUN2 PE=1 SV=2 - [NSUN2_HUMAN]	1	1	Q08J23		HCD	1	0	1	1	0	1.96e-05	106	110	2.37	0	14	60	2450000	3	671.647	2012.93	0	-0.45	26.31	8324	8324	MS2	0/0	0	0	hala.raw
High	A	2	VDNEFDQR	3371	Unambiguous	Cytoplasmic dynein 1 heavy chain 1 OS=Homo sapiens OX=9606 GN=DYNC1H1 PE=1 SV=5 - [DYHC1_HUMAN]	1	1	Q14204		HCD	1	0	1	1	0	0.00189	77	73	1.86	0	30	60	2360000	2	511.73	1022.45	0	-0.45	26.31	8325	8325	MS2	0/0	0	0	hala.raw
Middle	A	2	EMGTPGYR	1826	Unambiguous	60S ribosomal protein L7-like 1 OS=Homo sapiens OX=9606 GN=RPL7L1 PE=1 SV=1 - [RL7L_HUMAN]	1	1	Q6DKI1		HCD	1	0	1	1	0.021	0.25	87	84	1.84	0	34	60	1430000	2	455.708	910.408	0	-0.37	26.31	8326	8326	MS2	0/0	0	0	hala.raw
Middle	A	2	QGYQLIGSHSGVKLcR	2778	Unambiguous	S-adenosyl-L-methionine-dependent tRNA 4-demethylwyosine synthase OS=Homo sapiens OX=9606 GN=TYW1 PE=2 SV=2 - [TYW1_HUMAN]	1	1	Q9NV66	C15(Carbamidomethyl)	HCD	1	0	1	1	0.035	0.37	206	226	1.36	1	13	60	484000	5	361.394	1802.94	0	3.95	26.31	8327	8327	MS2	0/0	0	0	hala.raw
Middle	A	2	QQQAATSESSQSEASVR	1759	Unambiguous	E3 ubiquitin-protein ligase HUWE1 OS=Homo sapiens OX=9606 GN=HUWE1 PE=1 SV=3 - [HUWE1_HUMAN]	1	1	Q7Z6Z7		HCD	1	0	1	1	0.024	0.274	119	119	0.8	0	0	60	412000	2	897.416	1793.83	0	-0.4	26.32	8328	8328	MS2	0/0	0	0	hala.raw
High	A	2	LQDASAEVER	3379	Unambiguous	Bone marrow stromal antigen 2 OS=Homo sapiens OX=9606 GN=BST2 PE=1 SV=1 - [BST2_HUMAN]	1	1	Q10589		HCD	1	0	1	1	0	0.000618	149	139	2.1	0	32	60	3530000	2	559.276	1117.54	0	-3.99	26.32	8329	8329	MS2	0/0	0	0	hala.raw
High	A	2	ScYDLScHAR	3381	Unambiguous	Glycine--tRNA ligase OS=Homo sapiens OX=9606 GN=GARS PE=1 SV=3 - [GARS_HUMAN]	1	1	P41250	C2(Carbamidomethyl); C7(Carbamidomethyl)	HCD	1	0	1	1	0	0.000351	25	16	2.43	0	44	60	3050000	3	423.51	1268.51	0	-0.11	26.32	8330	8330	MS2	0/0	0	0	hala.raw
High	A	2	GRPYDYNGPR	3383	Unambiguous	Protein disulfide-isomerase A4 OS=Homo sapiens OX=9606 GN=PDIA4 PE=1 SV=2 - [PDIA4_HUMAN]	1	1	P13667		HCD	1	0	1	1	0	0.00761	142	154	2.19	0	25	60	2740000	3	398.86	1194.56	0	-0.42	26.32	8331	8331	MS2	0/0	0	0	hala.raw
High	A	2	FDDGAGGDNEVQR	3385	Unambiguous	26S proteasome regulatory subunit 7 OS=Homo sapiens OX=9606 GN=PSMC2 PE=1 SV=3 - [PRS7_HUMAN]	1	1	P35998		HCD	1	0	1	1	0	0.000132	19	26	1.96	0	63	60	2470000	2	690.29	1379.57	0	-6.97	26.32	8332	8332	MS2	0/0	0	0	hala.raw
High	A	2	cDSSPDSAEDVR	1957	Unambiguous	Alpha-2-HS-glycoprotein OS=Homo sapiens OX=9606 GN=AHSG PE=1 SV=2 - [FETUA_HUMAN]	1	1	P02765	C1(Carbamidomethyl)	HCD	1	0	1	1	0	1.18e-05	11	9	2.37	0	19	32	12100000	2	669.267	1337.53	0	-0.79	26.34	8339	8339	MS2	0/0	0	0	hala.raw
Middle	A	2	DFTSEPR	3397	Unambiguous	Eukaryotic translation initiation factor 2 subunit 3 OS=Homo sapiens OX=9606 GN=EIF2S3 PE=1 SV=3 - [IF2G_HUMAN]	2	1	P41091		HCD	1	0	1	1	0.048	0.466	116	100	1.58	0	6	46	6030000	2	426.198	851.389	0	-0.17	26.34	8341	8341	MS2	0/0	0	0	hala.raw
High	A	2	EVYQQQQYGSGGR	3402	Unambiguous	Heterogeneous nuclear ribonucleoprotein A/B OS=Homo sapiens OX=9606 GN=HNRNPAB PE=1 SV=2 - [ROAA_HUMAN]	1	1	Q99729		HCD	1	0	1	1	0	1.11e-05	99	103	2.13	0	18	60	5200000	2	750.348	1499.69	0	0.84	26.34	8343	8343	MS2	0/0	0	0	hala.raw
High	A	2	DYGNSPLHR	3404	Unambiguous	Polypyrimidine tract-binding protein 1 OS=Homo sapiens OX=9606 GN=PTBP1 PE=1 SV=1 - [PTBP1_HUMAN]	1	1	P26599		HCD	1	0	1	1	0	0.00524	85	101	2.2	0	38	60	4850000	2	529.755	1058.5	0	1.36	26.34	8344	8344	MS2	0/0	0	0	hala.raw
High	A	2	ScYDLScHAR	3381	Unambiguous	Glycine--tRNA ligase OS=Homo sapiens OX=9606 GN=GARS PE=1 SV=3 - [GARS_HUMAN]	1	1	P41250	C2(Carbamidomethyl); C7(Carbamidomethyl)	HCD	1	0	1	1	0	0.000538	25	16	1.72	0	46	60	3890000	2	634.76	1268.51	0	-0.77	26.35	8346	8346	MS2	0/0	0	0	hala.raw
High	A	2	APEQEQAAPGPAAGGEAPK	3410	Unambiguous	Brain acid soluble protein 1 OS=Homo sapiens OX=9606 GN=BASP1 PE=1 SV=2 - [BASP1_HUMAN]	1	1	P80723		HCD	1	0	1	1	0	3.45e-06	189	157	3.16	0	11	60	2610000	2	888.433	1775.86	0	1.04	26.35	8347	8347	MS2	0/0	0	0	hala.raw
High	A	2	QEEENPAEETGEEK	2324	Unambiguous	Alpha-endosulfine OS=Homo sapiens OX=9606 GN=ENSA PE=1 SV=1 - [ENSA_HUMAN]	1	1	O43768		HCD	1	0	1	1	0	0.00764	19	14	1.73	0	0	60	1120000	2	809.835	1618.66	0	-5.43	26.35	8349	8349	MS2	0/0	0	0	hala.raw
High	A	2	NEENTEPGAESSENADDPNK	2042	Unambiguous	Matrin-3 OS=Homo sapiens OX=9606 GN=MATR3 PE=1 SV=2 - [MATR3_HUMAN]	1	1	P43243		HCD	1	0	1	1	0.001	0.0219	16	11	0.84	0	0	60	2320000	2	1073.94	2146.87	0	0.51	26.35	8351	8351	MS2	0/0	0	0	hala.raw
High	A	2	FRPPETTER	3424	Unambiguous	Importin-9 OS=Homo sapiens OX=9606 GN=IPO9 PE=1 SV=3 - [IPO9_HUMAN]	1	1	Q96P70		HCD	1	0	1	1	0.001	0.0201	221	234	1.68	0	22	60	831000	3	378.196	1132.57	0	0.23	26.36	8354	8354	MS2	0/0	0	0	hala.raw
High	A	2	EGIPPDQQR	1944	Unambiguous	Ubiquitin-40S ribosomal protein S27a OS=Homo sapiens OX=9606 GN=RPS27A PE=1 SV=2 - [RS27A_HUMAN]	4	1	P62979		HCD	1	0	1	1	0	0.00788	158	163	2.06	0	15	19	14200000	2	520.262	1039.52	0	0.14	26.36	8356	8356	MS2	0/0	0	0	hala.raw
High	A	2	AVTEQGHELSNEER	2348	Unambiguous	14-3-3 protein beta/alpha OS=Homo sapiens OX=9606 GN=YWHAB PE=1 SV=3 - [1433B_HUMAN]	1	1	P31946		HCD	1	0	1	1	0	1.24e-06	124	137	2.88	0	2	60	11300000	2	799.874	1598.74	0	0.05	26.37	8357	8357	MS2	0/0	0	0	hala.raw
High	A	2	LLEGEEER	3431	Unambiguous	Prelamin-A/C OS=Homo sapiens OX=9606 GN=LMNA PE=1 SV=1 - [LMNA_HUMAN]|Lamin-B1 OS=Homo sapiens OX=9606 GN=LMNB1 PE=1 SV=2 - [LMNB1_HUMAN]|Lamin-B2 OS=Homo sapiens OX=9606 GN=LMNB2 PE=1 SV=4 - [LMNB2_HUMAN]	3	3	P02545;P20700;Q03252		HCD	1	0	1	1	0	0.00286	93	118	1.63	0	5	6	38600000	2	487.743	974.48	0	0.77	26.37	8360	8360	MS2	0/0	0	0	hala.raw
High	A	2	LAGESESNLR	3433	Unambiguous	Transitional endoplasmic reticulum ATPase OS=Homo sapiens OX=9606 GN=VCP PE=1 SV=4 - [TERA_HUMAN]	1	1	P55072		HCD	1	0	1	1	0	5.11e-05	212	188	2.24	0	21	11	24100000	2	538.273	1075.54	0	1.48	26.38	8361	8361	MS2	0/0	0	0	hala.raw
High	A	2	cEMEQQNQEYK	2005	Unambiguous	Keratin, type I cytoskeletal 17 OS=Homo sapiens OX=9606 GN=KRT17 PE=1 SV=2 - [K1C17_HUMAN]	2	1	Q04695	C1(Carbamidomethyl)	HCD	1	0	1	1	0	7.1e-06	11	20	3.04	0	5	19	27400000	2	743.8	1486.59	0	-0.3	26.38	8362	8362	MS2	0/0	0	0	hala.raw
High	A	2	IADGYEQAAR	3437	Unambiguous	T-complex protein 1 subunit epsilon OS=Homo sapiens OX=9606 GN=CCT5 PE=1 SV=1 - [TCPE_HUMAN]	1	1	P48643		HCD	1	0	1	1	0	5.68e-05	193	173	2.23	0	18	12	19300000	2	547.267	1093.53	0	-0.48	26.38	8363	8363	MS2	0/0	0	0	hala.raw
High	A	2	HEQNIDcGGGYVK	3439	Unambiguous	Calreticulin OS=Homo sapiens OX=9606 GN=CALR PE=1 SV=1 - [CALR_HUMAN]	1	1	P27797	C7(Carbamidomethyl)	HCD	1	0	1	1	0	1.75e-10	60	64	3.7	0	0	26	14700000	2	738.83	1476.65	0	-0.44	26.38	8364	8364	MS2	0/0	0	0	hala.raw
High	A	2	VTQVDGNSPVR	3441	Unambiguous	Coatomer subunit delta OS=Homo sapiens OX=9606 GN=ARCN1 PE=1 SV=1 - [COPD_HUMAN]	1	1	P48444		HCD	1	0	1	1	0	9.14e-05	179	179	2.43	0	12	55	6800000	2	586.307	1171.61	0	0.72	26.38	8365	8365	MS2	0/0	0	0	hala.raw
High	A	2	AIEENNNFSK	3443	Unambiguous	Stathmin OS=Homo sapiens OX=9606 GN=STMN1 PE=1 SV=3 - [STMN1_HUMAN]	2	1	P16949		HCD	1	0	1	1	0	0.00281	137	146	1.75	0	45	42	6700000	2	583.278	1165.55	0	0.79	26.38	8366	8366	MS2	0/0	0	0	hala.raw
High	A	2	ALEENNNFSK	3443	Unambiguous	Stathmin OS=Homo sapiens OX=9606 GN=STMN1 PE=1 SV=3 - [STMN1_HUMAN]	2	1	P16949		HCD	1	0	1	2	0	0.00281	137	146	1.75	0	45	42	6700000	2	583.278	1165.55	0	0.79	26.38	8366	8366	MS2	0/0	0	0	hala.raw
High	A	2	LTQDQDVDVK	3446	Unambiguous	Serine/threonine-protein phosphatase 2A 65 kDa regulatory subunit A alpha isoform OS=Homo sapiens OX=9606 GN=PPP2R1A PE=1 SV=4 - [2AAA_HUMAN]	1	1	P30153		HCD	1	0	1	1	0	0.000546	246	219	1.98	0	31	32	4630000	2	580.797	1160.59	0	6.51	26.38	8367	8367	MS2	0/0	0	0	hala.raw
High	A	2	IIHEDGYSEEEcR	3450	Unambiguous	Guanine nucleotide-binding protein G(i) subunit alpha-2 OS=Homo sapiens OX=9606 GN=GNAI2 PE=1 SV=3 - [GNAI2_HUMAN]	1	1	P04899	C12(Carbamidomethyl)	HCD	1	0	1	1	0	0.00518	28	25	1.39	0	0	60	956000	2	818.849	1636.69	0	-0.22	26.39	8369	8369	MS2	0/0	0	0	hala.raw
High	A	2	TTTAAAVASTGPSSR	3454	Unambiguous	Microtubule-associated protein 4 OS=Homo sapiens OX=9606 GN=MAP4 PE=1 SV=3 - [MAP4_HUMAN]	1	1	P27816		HCD	1	0	1	1	0	2.85e-07	201	204	3.08	0	21	55	8240000	2	689.353	1377.7	0	1	26.39	8371	8371	MS2	0/0	0	0	hala.raw
High	A	2	VAPAQPSEEGPGR	2422	Unambiguous	Eukaryotic translation initiation factor 4B OS=Homo sapiens OX=9606 GN=EIF4B PE=1 SV=2 - [IF4B_HUMAN]	1	1	P23588		HCD	1	0	1	1	0	9.48e-05	180	198	2.13	0	41	53	5490000	2	647.825	1294.64	0	2.48	26.41	8380	8380	MS2	0/0	0	0	hala.raw
Middle	A	2	AAPTAASDQPDSAATTEK	2590	Unambiguous	Partner of Y14 and mago OS=Homo sapiens OX=9606 GN=PYM1 PE=1 SV=1 - [PYM1_HUMAN]	1	1	Q9BRP8		HCD	1	0	1	1	0.015	0.205	111	90	1.06	0	21	60	808000	2	866.401	1731.8	0	-4.64	26.41	8382	8382	MS2	0/0	0	0	hala.raw
High	A	2	HEQNIDcGGGYVK	3439	Unambiguous	Calreticulin OS=Homo sapiens OX=9606 GN=CALR PE=1 SV=1 - [CALR_HUMAN]	1	1	P27797	C7(Carbamidomethyl)	HCD	1	0	1	1	0	0.000984	57	62	2.48	0	9	14	26000000	3	492.889	1476.65	0	-0.12	26.41	8383	8383	MS2	0/0	0	0	hala.raw
High	A	2	LQAEEVAQQK	3478	Unambiguous	Plectin OS=Homo sapiens OX=9606 GN=PLEC PE=1 SV=3 - [PLEC_HUMAN]	1	1	Q15149		HCD	1	0	1	1	0	0.000908	201	229	1.96	0	19	60	4480000	2	572.304	1143.6	0	-0.08	26.41	8384	8384	MS2	0/0	0	0	hala.raw
High	A	2	GPAAAQGSAAAPAEPK	2658	Unambiguous	Ubiquilin-2 OS=Homo sapiens OX=9606 GN=UBQLN2 PE=1 SV=2 - [UBQL2_HUMAN]	1	1	Q9UHD9		HCD	1	0	1	1	0.004	0.0594	221	225	1.11	0	30	60	1710000	2	697.356	1393.71	0	-1.34	26.42	8387	8387	MS2	0/0	0	0	hala.raw
High	A	2	AYGELPEHAK	3486	Unambiguous	Eukaryotic translation initiation factor 1A, Y-chromosomal OS=Homo sapiens OX=9606 GN=EIF1AY PE=1 SV=4 - [IF1AY_HUMAN]	2	1	O14602		HCD	1	0	1	1	0	0.00922	117	126	1.34	0	14	60	1320000	3	372.189	1114.55	0	-0.16	26.42	8388	8388	MS2	0/0	0	0	hala.raw
High	A	2	DSYVGDEAQSK	2007	Unambiguous	Actin, alpha cardiac muscle 1 OS=Homo sapiens OX=9606 GN=ACTC1 PE=1 SV=1 - [ACTC_HUMAN]|Actin, cytoplasmic 1 OS=Homo sapiens OX=9606 GN=ACTB PE=1 SV=1 - [ACTB_HUMAN]	6	2	P68032;P60709		HCD	1	0	1	1	0	0.00176	59	56	1.64	0	1	1	273000000	2	599.765	1198.52	0	0.09	26.43	8390	8390	MS2	0/0	0	0	hala.raw
High	A	2	NYQQNYQNSESGEK	2027	Unambiguous	Nuclease-sensitive element-binding protein 1 OS=Homo sapiens OX=9606 GN=YBX1 PE=1 SV=3 - [YBOX1_HUMAN]	1	1	P67809		HCD	1	0	1	1	0	1.49e-06	29	39	2.77	0	4	60	6370000	2	844.861	1688.72	0	0.25	26.43	8391	8391	MS2	0/0	0	0	hala.raw
High	A	2	NEISEMNR	3492	Unambiguous	Keratin, type II cytoskeletal 7 OS=Homo sapiens OX=9606 GN=KRT7 PE=1 SV=5 - [K2C7_HUMAN]	1	1	P08729		HCD	1	0	1	1	0	0.0053	74	74	1.92	0	8	8	32700000	2	496.727	992.447	0	0.39	26.43	8393	8393	MS2	0/0	0	0	hala.raw
High	A	2	AYGELPEHAK	3486	Unambiguous	Eukaryotic translation initiation factor 1A, Y-chromosomal OS=Homo sapiens OX=9606 GN=EIF1AY PE=1 SV=4 - [IF1AY_HUMAN]	2	1	O14602		HCD	1	0	1	1	0	0.00821	122	137	1.35	0	38	29	7530000	2	557.78	1114.55	0	0.32	26.44	8397	8397	MS2	0/0	0	0	hala.raw
High	A	2	DAPQDFHPDR	3509	Unambiguous	Filamin-A OS=Homo sapiens OX=9606 GN=FLNA PE=1 SV=4 - [FLNA_HUMAN]	1	1	P21333		HCD	1	0	1	1	0	0.00011	61	54	2.14	0	19	60	2310000	3	399.848	1197.53	0	1.18	26.44	8400	8400	MS2	0/0	0	0	hala.raw
High	A	2	GcPVNTEPSGPTcEK	3513	Unambiguous	Cytochrome c-type heme lyase OS=Homo sapiens OX=9606 GN=HCCS PE=1 SV=1 - [CCHL_HUMAN]	1	1	P53701	C2(Carbamidomethyl); C13(Carbamidomethyl)	HCD	1	0	1	1	0	0.00159	38	30	1.26	0	47	60	1870000	2	816.853	1632.7	0	-0.92	26.45	8402	8402	MS2	0/0	0	0	hala.raw
High	A	2	LEScGVTSDNcR	2394	Unambiguous	Ribonuclease inhibitor OS=Homo sapiens OX=9606 GN=RNH1 PE=1 SV=2 - [RINI_HUMAN]	1	1	P13489	C4(Carbamidomethyl); C11(Carbamidomethyl)	HCD	1	0	1	1	0	1.01e-05	20	21	2.15	0	17	60	1520000	2	699.29	1397.57	0	-3.6	26.45	8403	8403	MS2	0/0	0	0	hala.raw
High	A	2	TEAPAAPAAQETK	2424	Unambiguous	Brain acid soluble protein 1 OS=Homo sapiens OX=9606 GN=BASP1 PE=1 SV=2 - [BASP1_HUMAN]	1	1	P80723		HCD	1	0	1	1	0	0.000442	162	163	1.98	0	58	60	2020000	2	642.826	1284.64	0	0.68	26.47	8413	8413	MS2	0/0	0	0	hala.raw
High	A	2	EEPSQNDISPK	2984	Unambiguous	Nucleolar RNA helicase 2 OS=Homo sapiens OX=9606 GN=DDX21 PE=1 SV=5 - [DDX21_HUMAN]	1	1	Q9NR30		HCD	1	0	1	1	0.007	0.0914	71	86	1.08	0	16	60	1750000	2	622.293	1243.58	0	-1.68	26.47	8414	8414	MS2	0/0	0	0	hala.raw
High	A	2	APEQEQAAPGPAAGGEAPK	3410	Unambiguous	Brain acid soluble protein 1 OS=Homo sapiens OX=9606 GN=BASP1 PE=1 SV=2 - [BASP1_HUMAN]	1	1	P80723		HCD	1	0	1	1	0	2.75e-06	190	157	3.36	0	32	14	17700000	3	592.624	1775.86	0	1.07	26.47	8416	8416	MS2	0/0	0	0	hala.raw
High	A	2	DSYESYGNSR	2696	Unambiguous	RNA-binding motif protein, X chromosome OS=Homo sapiens OX=9606 GN=RBMX PE=1 SV=3 - [RBMX_HUMAN]	2	1	P38159		HCD	1	0	1	1	0	0.00141	17	18	1.57	0	58	51	3660000	2	589.242	1177.48	0	0.1	26.47	8417	8417	MS2	0/0	0	0	hala.raw
High	A	2	STVNcSTTPVAER	3541	Unambiguous	Nuclear pore complex protein Nup88 OS=Homo sapiens OX=9606 GN=NUP88 PE=1 SV=2 - [NUP88_HUMAN]	1	1	Q99567	C5(Carbamidomethyl)	HCD	1	0	1	1	0	0.000437	142	130	2.08	0	0	60	2140000	2	711.341	1421.68	0	4.56	26.47	8418	8418	MS2	0/0	0	0	hala.raw
High	A	2	ETMQSLNDR	1322	Unambiguous	Keratin, type I cytoskeletal 18 OS=Homo sapiens OX=9606 GN=KRT18 PE=1 SV=2 - [K1C18_HUMAN]	2	1	P05783		HCD	1	0	1	1	0	0.000441	63	53	1.9	0	46	9	17900000	2	547.251	1093.49	0	0.12	26.5	8432	8432	MS2	0/0	0	0	hala.raw
High	A	2	LcVQNSPQEAR	3568	Unambiguous	Cleavage stimulation factor subunit 2 OS=Homo sapiens OX=9606 GN=CSTF2 PE=1 SV=1 - [CSTF2_HUMAN]	1	1	P33240	C2(Carbamidomethyl)	HCD	1	0	1	1	0	0.000729	126	134	2.26	0	26	60	2310000	2	651.318	1301.63	0	1.16	26.5	8433	8433	MS2	0/0	0	0	hala.raw
High	A	2	ALADHSMAQTPR	3570	Unambiguous	Signal recognition particle receptor subunit alpha OS=Homo sapiens OX=9606 GN=SRPRA PE=1 SV=2 - [SRPRA_HUMAN]	1	1	P08240		HCD	1	0	1	1	0	0.00509	150	140	1.46	0	36	60	1810000	3	433.215	1297.63	0	0.07	26.5	8434	8434	MS2	0/0	0	0	hala.raw
High	A	2	ENQQATSGPNQPSVR	2078	Unambiguous	Y-box-binding protein 3 OS=Homo sapiens OX=9606 GN=YBX3 PE=1 SV=4 - [YBOX3_HUMAN]	1	1	P16989		HCD	1	0	1	1	0	3.97e-05	144	141	2.14	0	21	60	4340000	2	806.888	1612.77	0	0.18	26.51	8438	8438	MS2	0/0	0	0	hala.raw
High	A	2	ISSSSFSR	3579	Unambiguous	Keratin, type II cytoskeletal 8 OS=Homo sapiens OX=9606 GN=KRT8 PE=1 SV=7 - [K2C8_HUMAN]	1	1	P05787		HCD	1	0	1	1	0	0.00568	106	117	1.8	0	8	8	34000000	2	435.72	870.433	0	1.22	26.52	8440	8440	MS2	0/0	0	0	hala.raw
High	A	2	AMNGESLDGR	3581	Unambiguous	RNA-binding protein 3 OS=Homo sapiens OX=9606 GN=RBM3 PE=1 SV=1 - [RBM3_HUMAN]	1	1	P98179		HCD	1	0	1	1	0	0.000337	62	62	2.02	0	17	23	13700000	2	525.238	1049.47	0	0.43	26.52	8441	8441	MS2	0/0	0	0	hala.raw
Middle	A	2	YELGRPAANTK	3583	Unambiguous	40S ribosomal protein S8 OS=Homo sapiens OX=9606 GN=RPS8 PE=1 SV=2 - [RS8_HUMAN]	1	1	P62241		HCD	1	0	1	1	0.011	0.157	254	247	1.29	0	36	31	8730000	3	407.22	1219.64	0	1.02	26.52	8442	8442	MS2	0/0	0	0	hala.raw
High	A	2	YELGRPAANTK	3583	Unambiguous	40S ribosomal protein S8 OS=Homo sapiens OX=9606 GN=RPS8 PE=1 SV=2 - [RS8_HUMAN]	1	1	P62241		HCD	1	0	1	1	0	0.00188	221	218	2.52	0	45	57	5840000	2	610.328	1219.65	0	4.09	26.52	8443	8443	MS2	0/0	0	0	hala.raw
High	A	2	IEYNDQNDGScDVK	3599	Unambiguous	Filamin-B OS=Homo sapiens OX=9606 GN=FLNB PE=1 SV=2 - [FLNB_HUMAN]	1	1	O75369	C11(Carbamidomethyl)	HCD	1	0	1	1	0	0.00764	16	24	1.58	0	62	60	1440000	2	828.846	1656.68	0	2.09	26.53	8450	8450	MS2	0/0	0	0	hala.raw
High	A	2	SVSTPSEAGSQDSGDGAVGSR	3601	Unambiguous	Cytoplasmic dynein 1 intermediate chain 2 OS=Homo sapiens OX=9606 GN=DYNC1I2 PE=1 SV=3 - [DC1I2_HUMAN]	1	1	Q13409		HCD	1	0	1	1	0	1.05e-06	77	84	2.27	0	53	60	1300000	2	975.937	1950.87	0	1.66	26.54	8451	8451	MS2	0/0	0	0	hala.raw
High	A	2	AFHNEAQVNPER	3065	Unambiguous	T-complex protein 1 subunit alpha OS=Homo sapiens OX=9606 GN=TCP1 PE=1 SV=1 - [TCPA_HUMAN]	1	1	P17987		HCD	1	0	1	1	0	0.0038	126	122	1.8	0	9	21	14300000	3	471.229	1411.67	0	1.43	26.54	8453	8453	MS2	0/0	0	0	hala.raw
High	A	2	MMNGGHYTYSENR	3609	Unambiguous	Protein/nucleic acid deglycase DJ-1 OS=Homo sapiens OX=9606 GN=PARK7 PE=1 SV=2 - [PARK7_HUMAN]	1	1	Q99497		HCD	1	0	1	1	0	8.46e-05	19	17	1.72	0	46	21	15600000	3	520.55	1559.64	0	0.16	26.55	8456	8456	MS2	0/0	0	0	hala.raw
High	A	2	MDcQETPEGYK	3611	Unambiguous	Filamin-B OS=Homo sapiens OX=9606 GN=FLNB PE=1 SV=2 - [FLNB_HUMAN]	1	1	O75369	C3(Carbamidomethyl)	HCD	1	0	1	1	0	8.68e-06	11	9	2.15	0	35	28	12300000	2	679.274	1357.54	0	-0.07	26.55	8457	8457	MS2	0/0	0	0	hala.raw
High	A	2	MDSTEPPYSQK	3613	Unambiguous	Elongation factor 1-alpha 1 OS=Homo sapiens OX=9606 GN=EEF1A1 PE=1 SV=1 - [EF1A1_HUMAN]	2	1	P68104		HCD	1	0	1	1	0.004	0.05	69	54	1.34	0	19	54	6620000	2	641.785	1282.56	0	-0.08	26.55	8458	8458	MS2	0/0	0	0	hala.raw
Middle	A	2	AIEAAPQEPEQK	3619	Unambiguous	FLYWCH family member 2 OS=Homo sapiens OX=9606 GN=FLYWCH2 PE=1 SV=1 - [FWCH2_HUMAN]	1	1	Q96CP2		HCD	1	0	1	1	0.017	0.221	150	183	1.44	0	56	60	5410000	2	655.833	1310.66	0	0.28	26.55	8461	8461	MS2	0/0	0	0	hala.raw
High	A	2	EYEAALNSK	3626	Unambiguous	Lamin-B1 OS=Homo sapiens OX=9606 GN=LMNB1 PE=1 SV=2 - [LMNB1_HUMAN]	1	1	P20700		HCD	1	0	1	1	0.001	0.0121	128	144	1.53	0	62	37	2380000	2	512.755	1024.5	0	8.53	26.56	8464	8464	MS2	0/0	0	0	hala.raw
High	A	2	RDLMAcAQTGSGK	3628	Unambiguous	ATP-dependent RNA helicase DDX3Y OS=Homo sapiens OX=9606 GN=DDX3Y PE=1 SV=2 - [DDX3Y_HUMAN]	2	1	O15523	C6(Carbamidomethyl)	HCD	1	0	1	1	0	0.00112	117	117	2.57	1	60	60	2090000	2	697.829	1394.65	0	-0.2	26.56	8465	8465	MS2	0/0	0	0	hala.raw
High	A	2	ATAPQTQHVSPMR	3073	Unambiguous	Elongation factor 1-delta OS=Homo sapiens OX=9606 GN=EEF1D PE=1 SV=5 - [EF1D_HUMAN]	1	1	P29692		HCD	1	0	1	1	0.001	0.0167	185	207	1.8	0	54	60	2590000	3	475.244	1423.72	0	3.97	26.57	8470	8470	MS2	0/0	0	0	hala.raw
High	A	2	DGGAWGTEQR	3640	Unambiguous	Galectin-1 OS=Homo sapiens OX=9606 GN=LGALS1 PE=1 SV=2 - [LEG1_HUMAN]	1	1	P09382		HCD	1	0	1	1	0	0.00204	49	48	2.17	0	61	16	9750000	2	538.743	1076.48	0	2.17	26.57	8471	8471	MS2	0/0	0	0	hala.raw
High	A	2	KYEEIDNAPEER	3644	Unambiguous	Elongation factor Tu, mitochondrial OS=Homo sapiens OX=9606 GN=TUFM PE=1 SV=2 - [EFTU_HUMAN]	1	1	P49411		HCD	1	0	1	1	0	3.27e-05	116	108	2.63	1	50	60	7090000	2	746.849	1492.69	0	-0.68	26.57	8473	8473	MS2	0/0	0	0	hala.raw
High	A	2	APKPDGPGGGPGGSHMGGNYGDDR	1814	Unambiguous	RNA-binding protein FUS OS=Homo sapiens OX=9606 GN=FUS PE=1 SV=1 - [FUS_HUMAN]	1	1	P35637		HCD	1	0	1	1	0	0.000274	26	32	2.26	0	7	49	4610000	4	564	2252.98	0	1.46	26.58	8475	8475	MS2	0/0	0	0	hala.raw
High	A	2	VNEIVETNRPDSK	3652	Unambiguous	26S proteasome non-ATPase regulatory subunit 6 OS=Homo sapiens OX=9606 GN=PSMD6 PE=1 SV=1 - [PSMD6_HUMAN]	1	1	Q15008		HCD	1	0	1	1	0	0.000429	195	213	2.68	0	29	51	7180000	3	500.927	1500.77	0	1.11	26.58	8477	8477	MS2	0/0	0	0	hala.raw
High	A	2	DDVAPESGDTTVK	3661	Unambiguous	Ribosomal L1 domain-containing protein 1 OS=Homo sapiens OX=9606 GN=RSL1D1 PE=1 SV=3 - [RL1D1_HUMAN]	1	1	O76021		HCD	1	0	1	1	0	0.000165	79	105	2.21	0	6	25	17300000	2	667.31	1333.61	0	1.02	26.59	8482	8482	MS2	0/0	0	0	hala.raw
High	A	2	ADTQTYQPYNK	3664	Unambiguous	Enhancer of rudimentary homolog OS=Homo sapiens OX=9606 GN=ERH PE=1 SV=1 - [ERH_HUMAN]	1	1	P84090		HCD	1	0	1	1	0.003	0.0362	80	88	1.45	0	43	60	4590000	2	664.809	1328.61	0	-1.01	26.59	8484	8484	MS2	0/0	0	0	hala.raw
High	A	2	VAQPTITDNK	3666	Unambiguous	Filamin-A OS=Homo sapiens OX=9606 GN=FLNA PE=1 SV=4 - [FLNA_HUMAN]	1	1	P21333		HCD	1	0	1	1	0	0.00195	212	190	2.12	0	9	9	32800000	2	543.794	1086.58	0	1.25	26.6	8485	8485	MS2	0/0	0	0	hala.raw
High	A	2	NHEEEMNALR	1245	Unambiguous	Keratin, type I cytoskeletal 17 OS=Homo sapiens OX=9606 GN=KRT17 PE=1 SV=2 - [K1C17_HUMAN]	2	1	Q04695		HCD	1	0	1	1	0	0.000723	54	45	2.25	0	14	12	28500000	2	621.781	1242.55	0	0.73	26.6	8486	8486	MS2	0/0	0	0	hala.raw
High	A	2	IFAQDGEGQR	3670	Unambiguous	Filamin-B OS=Homo sapiens OX=9606 GN=FLNB PE=1 SV=2 - [FLNB_HUMAN]	1	1	O75369		HCD	1	0	1	1	0	0.000794	163	150	1.57	0	15	9	26000000	2	560.773	1120.54	0	0.58	26.6	8487	8487	MS2	0/0	0	0	hala.raw
High	A	2	RDLMAcAQTGSGK	3628	Unambiguous	ATP-dependent RNA helicase DDX3Y OS=Homo sapiens OX=9606 GN=DDX3Y PE=1 SV=2 - [DDX3Y_HUMAN]	2	1	O15523	C6(Carbamidomethyl)	HCD	1	0	1	1	0.002	0.0294	132	135	2.59	1	52	60	4330000	3	465.556	1394.65	0	1.54	26.6	8489	8489	MS2	0/0	0	0	hala.raw
High	A	2	DPNDVRPIQAR	3678	Unambiguous	Pinin OS=Homo sapiens OX=9606 GN=PNN PE=1 SV=5 - [PININ_HUMAN]	1	1	Q9H307		HCD	1	0	1	1	0	0.00208	193	175	2.22	0	26	60	3870000	3	427.562	1280.67	0	1.44	26.6	8491	8491	MS2	0/0	0	0	hala.raw
Middle	A	2	AHLTNQYMQR	3683	Unambiguous	Polyadenylate-binding protein 4 OS=Homo sapiens OX=9606 GN=PABPC4 PE=1 SV=1 - [PABP4_HUMAN]	1	1	Q13310		HCD	1	0	1	1	0.043	0.43	148	147	1.69	0	30	52	2730000	3	421.21	1261.61	0	2.69	26.61	8493	8493	MS2	0/0	0	0	hala.raw
High	A	2	GQEcEYPPTQDGR	3687	Unambiguous	Methionine aminopeptidase 2 OS=Homo sapiens OX=9606 GN=METAP2 PE=1 SV=1 - [MAP2_HUMAN]	1	1	P50579	C4(Carbamidomethyl)	HCD	1	0	1	1	0	0.00417	29	24	1.77	0	17	60	797000	2	768.825	1536.64	0	2.51	26.61	8495	8495	MS2	0/0	0	0	hala.raw
High	A	2	VSSDNVADLHEK	3689	Unambiguous	Proteasome subunit beta type-5 OS=Homo sapiens OX=9606 GN=PSMB5 PE=1 SV=3 - [PSB5_HUMAN]	1	1	P28074		HCD	1	0	1	1	0.001	0.0159	128	132	1.26	0	51	19	11300000	3	438.55	1313.63	0	1.02	26.61	8496	8496	MS2	0/0	0	0	hala.raw
High	A	2	VNEIVETNRPDSK	3652	Unambiguous	26S proteasome non-ATPase regulatory subunit 6 OS=Homo sapiens OX=9606 GN=PSMD6 PE=1 SV=1 - [PSMD6_HUMAN]	1	1	Q15008		HCD	1	0	1	1	0.001	0.0105	219	240	1.33	0	65	60	4950000	2	750.886	1500.77	0	0.23	26.61	8497	8497	MS2	0/0	0	0	hala.raw
Middle	A	2	ERPGLGSENMDR	3695	Unambiguous	ATP-dependent RNA helicase DDX42 OS=Homo sapiens OX=9606 GN=DDX42 PE=1 SV=1 - [DDX42_HUMAN]	1	1	Q86XP3		HCD	1	0	1	1	0.014	0.187	78	83	1.88	0	42	60	2880000	3	454.214	1360.63	0	0.5	26.62	8499	8499	MS2	0/0	0	0	hala.raw
High	A	2	LEAATQQNQQLR	3697	Unambiguous	Golgin subfamily A member 2 OS=Homo sapiens OX=9606 GN=GOLGA2 PE=1 SV=3 - [GOGA2_HUMAN]	1	1	Q08379		HCD	1	0	1	1	0.002	0.0328	168	132	1.12	0	62	60	2250000	2	700.372	1399.74	0	5.88	26.62	8500	8500	MS2	0/0	0	0	hala.raw
Middle	A	2	RFDGVQDPR	3699	Unambiguous	Membrane-associated progesterone receptor component 1 OS=Homo sapiens OX=9606 GN=PGRMC1 PE=1 SV=3 - [PGRC1_HUMAN]	1	1	O00264		HCD	1	0	1	1	0.04	0.407	199	194	1.75	1	40	60	947000	3	363.853	1089.54	0	0.23	26.62	8501	8501	MS2	0/0	0	0	hala.raw
High	A	2	NQGGYGGSSSSSSYGSGR	1600	Unambiguous	Heterogeneous nuclear ribonucleoprotein A1 OS=Homo sapiens OX=9606 GN=HNRNPA1 PE=1 SV=5 - [ROA1_HUMAN]	1	1	P09651		HCD	1	0	1	1	0	2.62e-11	14	12	3.69	0	2	19	17500000	2	847.854	1694.7	0	0.13	26.63	8503	8503	MS2	0/0	0	0	hala.raw
High	A	2	AFHNEAQVNPER	3065	Unambiguous	T-complex protein 1 subunit alpha OS=Homo sapiens OX=9606 GN=TCP1 PE=1 SV=1 - [TCPA_HUMAN]	1	1	P17987		HCD	1	0	1	1	0	0.0003	126	124	1.72	0	34	60	4830000	2	706.34	1411.67	0	0.48	26.63	8505	8505	MS2	0/0	0	0	hala.raw
High	A	2	YEITEQR	3707	Unambiguous	60S ribosomal protein L6 OS=Homo sapiens OX=9606 GN=RPL6 PE=1 SV=3 - [RL6_HUMAN]	1	1	Q02878		HCD	1	0	1	1	0.001	0.0224	113	123	1.41	0	12	9	30200000	2	469.733	938.459	0	0.91	26.63	8506	8506	MS2	0/0	0	0	hala.raw
Middle	A	2	NHEEEMNALR	1245	Unambiguous	Keratin, type I cytoskeletal 17 OS=Homo sapiens OX=9606 GN=KRT17 PE=1 SV=2 - [K1C17_HUMAN]	2	1	Q04695		HCD	1	0	1	1	0.011	0.149	54	45	2.22	0	4	39	8600000	3	414.856	1242.55	0	0.67	26.63	8507	8507	MS2	0/0	0	0	hala.raw
High	A	2	MMNGGHYTYSENR	3609	Unambiguous	Protein/nucleic acid deglycase DJ-1 OS=Homo sapiens OX=9606 GN=PARK7 PE=1 SV=2 - [PARK7_HUMAN]	1	1	Q99497		HCD	1	0	1	1	0	1.84e-06	18	16	2.42	0	0	60	5380000	2	780.321	1559.63	0	-1.24	26.63	8508	8508	MS2	0/0	0	0	hala.raw
High	A	2	DNTNEIYSGK	3713	Unambiguous	Integrin beta-1 OS=Homo sapiens OX=9606 GN=ITGB1 PE=1 SV=2 - [ITB1_HUMAN]	1	1	P05556		HCD	1	0	1	1	0	0.000998	85	65	1.66	0	28	60	3450000	2	570.762	1140.52	0	0.3	26.63	8509	8509	MS2	0/0	0	0	hala.raw
High	A	2	SGSMDPSGAHPSVR	3075	Unambiguous	KH domain-containing, RNA-binding, signal transduction-associated protein 1 OS=Homo sapiens OX=9606 GN=KHDRBS1 PE=1 SV=1 - [KHDR1_HUMAN]	1	1	Q07666		HCD	1	0	1	1	0	0.00355	103	93	1.4	0	67	54	3370000	3	462.215	1384.63	0	1.55	26.64	8510	8510	MS2	0/0	0	0	hala.raw
High	A	2	VGGTSDVEVNEK	3168	Unambiguous	60 kDa heat shock protein, mitochondrial OS=Homo sapiens OX=9606 GN=HSPD1 PE=1 SV=2 - [CH60_HUMAN]	1	1	P10809		HCD	1	0	1	1	0	0.000534	145	139	1.76	0	38	20	17000000	2	617.301	1233.6	0	-0.63	26.66	8519	8519	MS2	0/0	0	0	hala.raw
High	A	2	ESFDGSVR	3733	Unambiguous	Nucleolin OS=Homo sapiens OX=9606 GN=NCL PE=1 SV=3 - [NUCL_HUMAN]	1	1	P19338		HCD	1	0	1	1	0.001	0.0108	80	81	1.59	0	25	42	7810000	2	448.709	896.411	0	-0.07	26.66	8521	8521	MS2	0/0	0	0	hala.raw
High	A	2	HLPDNEcIEK	3735	Unambiguous	Arginine--tRNA ligase, cytoplasmic OS=Homo sapiens OX=9606 GN=RARS PE=1 SV=2 - [SYRC_HUMAN]	1	1	P54136	C7(Carbamidomethyl)	HCD	1	0	1	1	0.002	0.0315	104	107	1.58	0	41	60	6910000	2	627.793	1254.58	0	0.04	26.66	8522	8522	MS2	0/0	0	0	hala.raw
High	A	2	TQASSSFQDSSQPAGK	2684	Unambiguous	Probable 28S rRNA (cytosine(4447)-C(5))-methyltransferase OS=Homo sapiens OX=9606 GN=NOP2 PE=1 SV=2 - [NOP2_HUMAN]	1	1	P46087		HCD	1	0	1	1	0	0.00467	87	98	1.61	0	0	60	1510000	2	813.373	1625.74	0	-1.02	26.67	8528	8528	MS2	0/0	0	0	hala.raw
High	A	2	SYSSGGEDGYVR	3753	Unambiguous	Eukaryotic translation initiation factor 3 subunit I OS=Homo sapiens OX=9606 GN=EIF3I PE=1 SV=1 - [EIF3I_HUMAN]	1	1	Q13347		HCD	1	0	1	1	0	3.83e-05	28	26	1.87	0	38	51	6640000	2	638.775	1276.54	0	-0.44	26.68	8531	8531	MS2	0/0	0	0	hala.raw
High	A	2	EGYYYR	3757	Unambiguous	Asparagine synthetase [glutamine-hydrolyzing] OS=Homo sapiens OX=9606 GN=ASNS PE=1 SV=4 - [ASNS_HUMAN]	1	1	P08243		HCD	1	0	1	1	0.009	0.128	64	68	1.13	0	40	60	2900000	2	425.69	850.374	0	0.7	26.68	8533	8533	MS2	0/0	0	0	hala.raw
High	A	2	MLEDPQER	3765	Unambiguous	Probable ATP-dependent RNA helicase DDX23 OS=Homo sapiens OX=9606 GN=DDX23 PE=1 SV=3 - [DDX23_HUMAN]	1	1	Q9BUQ8		HCD	1	0	1	1	0	0.00592	75	81	1.69	0	46	60	3460000	2	509.238	1017.47	0	1.02	26.69	8538	8538	MS2	0/0	0	0	hala.raw
High	A	2	SEDDESGAGELTR	3767	Unambiguous	DNA replication licensing factor MCM7 OS=Homo sapiens OX=9606 GN=MCM7 PE=1 SV=4 - [MCM7_HUMAN]	1	1	P33993		HCD	1	0	1	1	0	9.71e-05	34	25	2.16	0	28	60	2840000	2	683.292	1365.58	0	-0.41	26.69	8539	8539	MS2	0/0	0	0	hala.raw
High	A	2	YFDGSGGNNHAVEHYR	3771	Unambiguous	Ubiquitin carboxyl-terminal hydrolase 5 OS=Homo sapiens OX=9606 GN=USP5 PE=1 SV=2 - [UBP5_HUMAN]	1	1	P45974		HCD	1	0	1	3	0	0.000563	58	62	0.96	0	56	55	1770000	4	456.453	1822.79	0	0.32	26.7	8540	8540	MS2	0/0	0	0	hala.raw
High	A	2	ESEPQAAAEPAEAK	2735	Unambiguous	Brain acid soluble protein 1 OS=Homo sapiens OX=9606 GN=BASP1 PE=1 SV=2 - [BASP1_HUMAN]	1	1	P80723		HCD	1	0	1	1	0	3.65e-05	93	102	1.92	0	5	23	20400000	2	714.335	1427.66	0	-0.94	26.71	8546	8546	MS2	0/0	0	0	hala.raw
High	A	2	QDVDNASLAR	3220	Unambiguous	Vimentin OS=Homo sapiens OX=9606 GN=VIM PE=1 SV=4 - [VIME_HUMAN]	1	1	P08670		HCD	1	0	1	1	0	6.44e-05	152	155	2.54	0	35	7	20400000	2	544.771	1088.53	0	0.78	26.72	8550	8550	MS2	0/0	0	0	hala.raw
High	A	2	TDEGIAYR	3791	Unambiguous	Peroxiredoxin-2 OS=Homo sapiens OX=9606 GN=PRDX2 PE=1 SV=5 - [PRDX2_HUMAN]	1	1	P32119		HCD	1	0	1	1	0	0.00426	88	91	1.82	0	35	12	18100000	2	462.725	924.442	0	0.08	26.72	8551	8551	MS2	0/0	0	0	hala.raw
High	A	2	MDcQEcPEGYR	3793	Unambiguous	Filamin-A OS=Homo sapiens OX=9606 GN=FLNA PE=1 SV=4 - [FLNA_HUMAN]	1	1	P21333	C3(Carbamidomethyl); C6(Carbamidomethyl)	HCD	1	0	1	1	0	2.37e-06	4	4	2.99	0	12	60	14900000	2	722.768	1444.53	0	-0.06	26.72	8552	8552	MS2	0/0	0	0	hala.raw
High	A	2	AGFAGDDAPR	3795	Unambiguous	Actin, alpha cardiac muscle 1 OS=Homo sapiens OX=9606 GN=ACTC1 PE=1 SV=1 - [ACTC_HUMAN]|Actin, cytoplasmic 1 OS=Homo sapiens OX=9606 GN=ACTB PE=1 SV=1 - [ACTB_HUMAN]	10	2	P68032;P60709		HCD	1	0	1	1	0	6.1e-05	83	88	1.84	0	3	1	185000000	2	488.728	976.449	0	1.06	26.72	8553	8553	MS2	0/0	0	0	hala.raw
High	A	2	YTAQVDAEEK	2899	Unambiguous	ATP synthase subunit d, mitochondrial OS=Homo sapiens OX=9606 GN=ATP5PD PE=1 SV=3 - [ATP5H_HUMAN]	1	1	O75947		HCD	1	0	1	1	0	0.000674	106	105	1.97	0	55	50	3820000	2	577.273	1153.54	0	2.08	26.72	8554	8554	MS2	0/0	0	0	hala.raw
High	A	2	GPPPPPTASEPTR	3799	Unambiguous	Transcription elongation regulator 1 OS=Homo sapiens OX=9606 GN=TCERG1 PE=1 SV=2 - [TCRG1_HUMAN]	1	1	O14776		HCD	1	0	1	1	0	0.000822	222	222	2.8	0	51	57	2930000	2	652.337	1303.67	0	2.11	26.72	8555	8555	MS2	0/0	0	0	hala.raw
High	A	2	LEcVEPNcR	3801	Unambiguous	60S ribosomal protein L36a OS=Homo sapiens OX=9606 GN=RPL36A PE=1 SV=2 - [RL36A_HUMAN]	2	1	P83881	C3(Carbamidomethyl); C8(Carbamidomethyl)	HCD	1	0	1	1	0	0.00167	39	41	2.12	0	55	48	5640000	2	588.761	1176.52	0	1.61	26.73	8556	8556	MS2	0/0	0	0	hala.raw
High	A	2	IEGDETSTEAATR	2163	Unambiguous	DNA-directed RNA polymerases I, II, and III subunit RPABC3 OS=Homo sapiens OX=9606 GN=POLR2H PE=1 SV=4 - [RPAB3_HUMAN]	1	1	P52434		HCD	1	0	1	1	0	0.00189	83	96	1.45	0	38	60	4860000	2	690.318	1379.63	0	0.37	26.73	8557	8557	MS2	0/0	0	0	hala.raw
High	A	2	AGLESGAEPGDGDSDTTK	3811	Unambiguous	H/ACA ribonucleoprotein complex subunit DKC1 OS=Homo sapiens OX=9606 GN=DKC1 PE=1 SV=3 - [DKC1_HUMAN]	1	1	O60832		HCD	1	0	1	1	0.001	0.0192	41	50	1.28	0	0	60	839000	2	853.876	1706.75	0	5.74	26.74	8562	8562	MS2	0/0	0	0	hala.raw
High	A	2	MRPGVAcSVSQAQK	3299	Unambiguous	60S ribosomal protein L9 OS=Homo sapiens OX=9606 GN=RPL9 PE=1 SV=1 - [RL9_HUMAN]	1	1	P32969	C7(Carbamidomethyl)	HCD	1	0	1	1	0	0.000122	204	198	2.71	0	17	30	7430000	3	506.922	1518.75	0	0.3	26.76	8572	8572	MS2	0/0	0	0	hala.raw
High	A	2	SLAAEEEAAR	2064	Unambiguous	Plectin OS=Homo sapiens OX=9606 GN=PLEC PE=1 SV=3 - [PLEC_HUMAN]	1	1	Q15149		HCD	1	0	1	1	0	0.00271	144	130	2.2	0	38	60	6030000	2	523.759	1046.51	0	-1.23	26.76	8573	8573	MS2	0/0	0	0	hala.raw
High	A	2	MRPGVAcSVSQAQK	3299	Unambiguous	60S ribosomal protein L9 OS=Homo sapiens OX=9606 GN=RPL9 PE=1 SV=1 - [RL9_HUMAN]	1	1	P32969	C7(Carbamidomethyl)	HCD	1	0	1	1	0	8.55e-05	206	195	2.97	0	22	60	2970000	2	759.879	1518.75	0	-0.15	26.76	8574	8574	MS2	0/0	0	0	hala.raw
High	A	2	FcDNSSAIQGK	3838	Unambiguous	Phosphoribosylformylglycinamidine synthase OS=Homo sapiens OX=9606 GN=PFAS PE=1 SV=4 - [PUR4_HUMAN]	1	1	O15067	C2(Carbamidomethyl)	HCD	1	0	1	1	0	4.02e-05	71	52	1.86	0	40	60	4600000	2	613.777	1226.55	0	0.08	26.77	8578	8578	MS2	0/0	0	0	hala.raw
Middle	A	2	ALTDYR	3846	Unambiguous	26S proteasome non-ATPase regulatory subunit 11 OS=Homo sapiens OX=9606 GN=PSMD11 PE=1 SV=3 - [PSD11_HUMAN]	1	1	O00231		HCD	1	0	1	1	0.027	0.305	105	89	1.29	0	12	60	1200000	2	369.694	738.38	0	2.31	26.77	8582	8582	MS2	0/0	0	0	hala.raw
High	A	2	EVVEEAENGR	2307	Unambiguous	Prothymosin alpha OS=Homo sapiens OX=9606 GN=PTMA PE=1 SV=2 - [PTMA_HUMAN]	1	1	P06454		HCD	1	0	1	1	0	0.000137	94	99	2.34	0	20	7	36300000	2	566.268	1131.53	0	0.68	26.78	8585	8585	MS2	0/0	0	0	hala.raw
High	A	2	ETPAATEAPSSTPK	2813	Unambiguous	Brain acid soluble protein 1 OS=Homo sapiens OX=9606 GN=BASP1 PE=1 SV=2 - [BASP1_HUMAN]	1	1	P80723		HCD	1	0	1	1	0	2.34e-06	152	145	2.61	0	16	20	21600000	2	693.842	1386.68	0	1.2	26.78	8586	8586	MS2	0/0	0	0	hala.raw
High	A	2	DcVGPEVEK	3329	Unambiguous	Phosphoglycerate kinase 1 OS=Homo sapiens OX=9606 GN=PGK1 PE=1 SV=3 - [PGK1_HUMAN]	1	1	P00558	C2(Carbamidomethyl)	HCD	1	0	1	1	0.005	0.077	51	51	1.51	0	22	9	20900000	2	516.737	1032.47	0	0.74	26.78	8587	8587	MS2	0/0	0	0	hala.raw
High	A	2	DGEEAGAYDGPR	3857	Unambiguous	Protein disulfide-isomerase A3 OS=Homo sapiens OX=9606 GN=PDIA3 PE=1 SV=4 - [PDIA3_HUMAN]	1	1	P30101		HCD	1	0	1	1	0	4.54e-05	27	18	2.18	0	16	12	21200000	2	618.76	1236.51	0	-0.05	26.79	8588	8588	MS2	0/0	0	0	hala.raw
High	A	2	TVLDQQQTPSR	3859	Unambiguous	Leucine-rich PPR motif-containing protein, mitochondrial OS=Homo sapiens OX=9606 GN=LRPPRC PE=1 SV=3 - [LPPRC_HUMAN]	1	1	P42704		HCD	1	0	1	1	0	0.0044	207	193	1.75	0	37	37	9120000	2	636.83	1272.65	0	-0.64	26.79	8589	8589	MS2	0/0	0	0	hala.raw
High	A	2	YSGSEGSTQTLTK	2811	Unambiguous	Protein S100-P OS=Homo sapiens OX=9606 GN=S100P PE=1 SV=2 - [S100P_HUMAN]	1	1	P25815		HCD	1	0	1	1	0	4.01e-06	126	131	2.4	0	44	40	8500000	2	679.825	1358.64	0	-0.52	26.79	8590	8590	MS2	0/0	0	0	hala.raw
High	A	2	HSGPNSADSANDGFVR	3868	Unambiguous	Heterogeneous nuclear ribonucleoprotein F OS=Homo sapiens OX=9606 GN=HNRNPF PE=1 SV=3 - [HNRPF_HUMAN]	1	1	P52597		HCD	1	0	1	1	0	9.29e-08	61	65	2.3	0	16	60	2670000	2	815.866	1630.72	0	2.09	26.79	8593	8593	MS2	0/0	0	0	hala.raw
High	A	2	YcDPDSYHR	1887	Unambiguous	Splicing factor U2AF 65 kDa subunit OS=Homo sapiens OX=9606 GN=U2AF2 PE=1 SV=4 - [U2AF2_HUMAN]	1	1	P26368	C2(Carbamidomethyl)	HCD	1	0	1	1	0.002	0.0283	13	9	1.19	0	50	60	1400000	3	404.83	1212.48	0	2.33	26.79	8594	8594	MS2	0/0	0	0	hala.raw
High	A	2	VAVTEGcQPSR	2426	Unambiguous	Filamin-B OS=Homo sapiens OX=9606 GN=FLNB PE=1 SV=2 - [FLNB_HUMAN]	1	1	O75369	C7(Carbamidomethyl)	HCD	1	0	1	1	0.001	0.0135	141	141	1.55	0	58	24	7080000	2	602.295	1203.58	0	3.21	26.8	8596	8596	MS2	0/0	0	0	hala.raw
High	A	2	AEDGENYDIK	3876	Unambiguous	Tubulin-specific chaperone A OS=Homo sapiens OX=9606 GN=TBCA PE=1 SV=3 - [TBCA_HUMAN]	1	1	O75347		HCD	1	0	1	1	0.001	0.0148	56	62	1.82	0	57	42	5010000	2	577.255	1153.5	0	0.92	26.8	8597	8597	MS2	0/0	0	0	hala.raw
High	A	2	AAQQQEEQEEKEEEDDEQTLHR	3878	Unambiguous	Immunoglobulin-binding protein 1 OS=Homo sapiens OX=9606 GN=IGBP1 PE=1 SV=1 - [IGBP1_HUMAN]	1	1	P78318		HCD	1	0	1	1	0	0.000704	33	35	1.84	1	71	60	2770000	4	675.547	2699.17	0	0.35	26.8	8598	8598	MS2	0/0	0	0	hala.raw
High	A	2	EEDcHSPTSKPPKPDQPLK	2694	Unambiguous	Eukaryotic translation initiation factor 4B OS=Homo sapiens OX=9606 GN=EIF4B PE=1 SV=2 - [IF4B_HUMAN]	1	1	P23588	C4(Carbamidomethyl)	HCD	1	0	1	1	0.001	0.0144	167	157	1.4	0	0	60	1380000	3	730.688	2190.05	0	0.14	26.8	8600	8600	MS2	0/0	0	0	hala.raw
High	A	2	GVEVTVGHEQEEGGK	3886	Unambiguous	Glutamine amidotransferase-like class 1 domain-containing protein 3B, mitochondrial OS=Homo sapiens OX=9606 GN=GATD3B PE=1 SV=1 - [GAL3B_HUMAN]	2	1	A0A0B4J2D5		HCD	1	0	1	1	0	0.00432	138	122	1.32	0	19	60	1130000	2	777.873	1554.74	0	-0.77	26.81	8602	8602	MS2	0/0	0	0	hala.raw
High	A	2	AVTEQGHELSNEER	2348	Unambiguous	14-3-3 protein beta/alpha OS=Homo sapiens OX=9606 GN=YWHAB PE=1 SV=3 - [1433B_HUMAN]	1	1	P31946		HCD	1	0	1	1	0	4e-05	125	137	2.8	0	4	16	21100000	3	533.585	1598.74	0	0.65	26.81	8605	8605	MS2	0/0	0	0	hala.raw
High	A	2	TPGPGAQSALR	3894	Unambiguous	40S ribosomal protein S14 OS=Homo sapiens OX=9606 GN=RPS14 PE=1 SV=3 - [RS14_HUMAN]	1	1	P62263		HCD	1	0	1	1	0	7.82e-06	159	160	2.68	0	8	12	18800000	2	527.786	1054.56	0	0.67	26.82	8608	8608	MS2	0/0	0	0	hala.raw
High	A	2	YTcSFcGK	3898	Unambiguous	60S ribosomal protein L37a OS=Homo sapiens OX=9606 GN=RPL37A PE=1 SV=2 - [RL37A_HUMAN]	2	1	P61513	C3(Carbamidomethyl); C6(Carbamidomethyl)	HCD	1	0	1	1	0	0.00523	18	9	1.47	0	14	17	13400000	2	511.708	1022.41	0	0.77	26.82	8610	8610	MS2	0/0	0	0	hala.raw
High	A	2	LAVDEEENADNNTK	3902	Unambiguous	Transferrin receptor protein 1 OS=Homo sapiens OX=9606 GN=TFRC PE=1 SV=2 - [TFR1_HUMAN]	1	1	P02786		HCD	1	0	1	1	0	1.34e-07	73	55	2.97	0	31	60	6670000	2	781.353	1561.7	0	1	26.83	8612	8612	MS2	0/0	0	0	hala.raw
High	A	2	DENQSINHQMAQEDAQR	3904	Unambiguous	Annexin A7 OS=Homo sapiens OX=9606 GN=ANXA7 PE=1 SV=3 - [ANXA7_HUMAN]	1	1	P20073		HCD	1	0	1	1	0	5.31e-06	32	25	2.36	0	46	60	2610000	3	671.96	2013.86	0	-1.59	26.83	8613	8613	MS2	0/0	0	0	hala.raw
High	A	2	RAGELTEDEVER	3912	Unambiguous	40S ribosomal protein S18 OS=Homo sapiens OX=9606 GN=RPS18 PE=1 SV=3 - [RS18_HUMAN]	1	1	P62269		HCD	1	0	1	1	0	1.58e-06	157	150	3.73	1	9	30	14400000	2	702.343	1403.68	0	1.74	26.83	8617	8617	MS2	0/0	0	0	hala.raw
High	A	2	YTQSNSVcYAK	2817	Unambiguous	Bifunctional purine biosynthesis protein PURH OS=Homo sapiens OX=9606 GN=ATIC PE=1 SV=3 - [PUR9_HUMAN]	1	1	P31939	C8(Carbamidomethyl)	HCD	1	0	1	1	0	0.00296	66	65	1.41	0	17	60	3340000	2	660.799	1320.59	0	0.85	26.84	8621	8621	MS2	0/0	0	0	hala.raw
High	A	2	TDAPQPDVKEEEEEKEEEK	3014	Unambiguous	Calnexin OS=Homo sapiens OX=9606 GN=CANX PE=1 SV=2 - [CALX_HUMAN]	1	1	P27824		HCD	1	0	1	1	0.002	0.0262	83	90	2.23	2	23	60	3240000	3	753.676	2259.01	0	-0.32	26.84	8622	8622	MS2	0/0	0	0	hala.raw
High	A	2	cDSSPDSAEDVR	1957	Unambiguous	Alpha-2-HS-glycoprotein OS=Homo sapiens OX=9606 GN=AHSG PE=1 SV=2 - [FETUA_HUMAN]	1	1	P02765	C1(Carbamidomethyl)	HCD	1	0	1	1	0	1.55e-05	12	9	2.37	0	41	41	10400000	2	669.268	1337.53	0	0.4	26.85	8627	8627	MS2	0/0	0	0	hala.raw
High	A	2	TTHFVEGGDAGNREDQINR	3910	Unambiguous	60S ribosomal protein L7 OS=Homo sapiens OX=9606 GN=RPL7 PE=1 SV=1 - [RL7_HUMAN]	1	1	P18124		HCD	1	0	1	1	0	0.00148	107	119	3.3	1	6	11	27600000	4	529.751	2115.98	0	1.52	26.85	8628	8628	MS2	0/0	0	0	hala.raw
High	A	2	EPSEVPTPK	3932	Unambiguous	High mobility group protein HMG-I/HMG-Y OS=Homo sapiens OX=9606 GN=HMGA1 PE=1 SV=3 - [HMGA1_HUMAN]	1	1	P17096		HCD	1	0	1	1	0	0.00709	114	116	1.74	0	25	8	27000000	2	492.255	983.503	0	-1.44	26.86	8630	8630	MS2	0/0	0	0	hala.raw
High	A	2	APEQEQAAPGPAAGGEAPK	3410	Unambiguous	Brain acid soluble protein 1 OS=Homo sapiens OX=9606 GN=BASP1 PE=1 SV=2 - [BASP1_HUMAN]	1	1	P80723		HCD	1	0	1	1	0	1.21e-06	180	151	3.82	0	0	60	7730000	2	888.432	1775.86	0	0.43	26.86	8631	8631	MS2	0/0	0	0	hala.raw
High	A	2	MGPGAASGGERPNLK	3939	Unambiguous	Ras-related protein Rab-1B OS=Homo sapiens OX=9606 GN=RAB1B PE=1 SV=1 - [RAB1B_HUMAN]	1	1	Q9H0U4		HCD	1	0	1	1	0	2.99e-05	174	155	2.6	0	40	26	8140000	3	481.246	1441.72	0	0.63	26.86	8633	8633	MS2	0/0	0	0	hala.raw
High	A	2	YTcGEAPDYDR	3945	Unambiguous	Glutathione S-transferase Mu 3 OS=Homo sapiens OX=9606 GN=GSTM3 PE=1 SV=3 - [GSTM3_HUMAN]	1	1	P21266	C3(Carbamidomethyl)	HCD	1	0	1	1	0	0.00409	8	10	1.68	0	51	60	3280000	2	673.769	1346.53	0	-0.64	26.87	8636	8636	MS2	0/0	0	0	hala.raw
Middle	A	2	NEENTEPGAESSENADDPNK	2042	Unambiguous	Matrin-3 OS=Homo sapiens OX=9606 GN=MATR3 PE=1 SV=2 - [MATR3_HUMAN]	1	1	P43243		HCD	1	0	1	1	0.027	0.303	16	10	1	0	0	60	935000	2	1073.93	2146.86	0	-2.21	26.87	8637	8637	MS2	0/0	0	0	hala.raw
High	A	2	VAPAEPQEAPDSTAAGGSASK	3954	Unambiguous	Triokinase/FMN cyclase OS=Homo sapiens OX=9606 GN=TKFC PE=1 SV=2 - [TKFC_HUMAN]	1	1	Q3LXA3		HCD	1	0	1	1	0	7.83e-06	133	134	1.79	0	10	60	1500000	2	970.965	1940.92	0	1.21	26.88	8641	8641	MS2	0/0	0	0	hala.raw
High	A	2	QEEENPAEETGEEK	2324	Unambiguous	Alpha-endosulfine OS=Homo sapiens OX=9606 GN=ENSA PE=1 SV=1 - [ENSA_HUMAN]	1	1	O43768		HCD	1	0	1	1	0	0.000917	19	14	2	0	36	60	1150000	2	809.835	1618.66	0	-5.36	26.88	8643	8643	MS2	0/0	0	0	hala.raw
High	A	2	cEMEQQNQEYK	2005	Unambiguous	Keratin, type I cytoskeletal 17 OS=Homo sapiens OX=9606 GN=KRT17 PE=1 SV=2 - [K1C17_HUMAN]	2	1	Q04695	C1(Carbamidomethyl)	HCD	1	0	1	1	0	1.07e-05	9	18	2.65	0	4	19	23300000	2	743.801	1486.59	0	0.11	26.89	8645	8645	MS2	0/0	0	0	hala.raw
High	A	2	HEQNIDcGGGYVK	3439	Unambiguous	Calreticulin OS=Homo sapiens OX=9606 GN=CALR PE=1 SV=1 - [CALR_HUMAN]	1	1	P27797	C7(Carbamidomethyl)	HCD	1	0	1	1	0	1.97e-09	57	61	3.45	0	25	60	10700000	2	738.83	1476.65	0	-0.36	26.89	8646	8646	MS2	0/0	0	0	hala.raw
High	A	2	AVTEQGHELSNEER	2348	Unambiguous	14-3-3 protein beta/alpha OS=Homo sapiens OX=9606 GN=YWHAB PE=1 SV=3 - [1433B_HUMAN]	1	1	P31946		HCD	1	0	1	1	0	1.07e-07	125	137	3.03	0	4	60	11100000	2	799.874	1598.74	0	0.51	26.89	8647	8647	MS2	0/0	0	0	hala.raw
High	A	2	RAGELTEDEVER	3912	Unambiguous	40S ribosomal protein S18 OS=Homo sapiens OX=9606 GN=RPS18 PE=1 SV=3 - [RS18_HUMAN]	1	1	P62269		HCD	1	0	1	1	0.001	0.0184	155	148	2.67	1	33	14	13900000	3	468.564	1403.68	0	1.01	26.89	8648	8648	MS2	0/0	0	0	hala.raw
High	A	2	ETMVTSTTEPSR	3969	Unambiguous	Glucosidase 2 subunit beta OS=Homo sapiens OX=9606 GN=PRKCSH PE=1 SV=2 - [GLU2B_HUMAN]	1	1	P14314		HCD	1	0	1	1	0	1.63e-05	105	116	2.68	0	55	25	11900000	2	669.814	1338.62	0	0.38	26.89	8649	8649	MS2	0/0	0	0	hala.raw
High	A	2	QDAQSLHGDIPQK	3981	Unambiguous	Nucleolar RNA helicase 2 OS=Homo sapiens OX=9606 GN=DDX21 PE=1 SV=5 - [DDX21_HUMAN]	1	1	Q9NR30		HCD	1	0	1	1	0	0.000685	163	194	2.4	0	58	60	3440000	2	718.861	1436.71	0	1.14	26.9	8653	8653	MS2	0/0	0	0	hala.raw
High	A	2	DENQSINHQMAQEDAQR	3904	Unambiguous	Annexin A7 OS=Homo sapiens OX=9606 GN=ANXA7 PE=1 SV=3 - [ANXA7_HUMAN]	1	1	P20073		HCD	1	0	1	1	0.004	0.0505	37	33	0.84	0	0	60	1130000	2	1007.44	2013.87	0	-0.31	26.9	8656	8656	MS2	0/0	0	0	hala.raw
High	A	2	QTYSTEPNNLK	3989	Unambiguous	60S ribosomal protein L28 OS=Homo sapiens OX=9606 GN=RPL28 PE=1 SV=3 - [RL28_HUMAN]	1	1	P46779		HCD	1	0	1	1	0	0.000276	167	172	1.77	0	6	9	49100000	2	647.817	1294.63	0	-0.22	26.91	8659	8659	MS2	0/0	0	0	hala.raw
High	A	2	HLTYENVER	3991	Unambiguous	Ras-related protein Rab-11B OS=Homo sapiens OX=9606 GN=RAB11B PE=1 SV=4 - [RB11B_HUMAN]	2	1	Q15907		HCD	1	0	1	1	0.002	0.0295	181	173	1.49	0	23	28	13000000	2	580.789	1160.57	0	0.33	26.91	8660	8660	MS2	0/0	0	0	hala.raw
High	A	2	TYGEPESAGPSR	2616	Unambiguous	Emerin OS=Homo sapiens OX=9606 GN=EMD PE=1 SV=1 - [EMD_HUMAN]	1	1	P50402		HCD	1	0	1	1	0	0.000807	91	103	2.49	0	39	60	6260000	2	625.787	1250.57	0	2.09	26.92	8664	8664	MS2	0/0	0	0	hala.raw
High	A	2	VLANPGNSQVAR	3999	Unambiguous	Importin subunit beta-1 OS=Homo sapiens OX=9606 GN=KPNB1 PE=1 SV=2 - [IMB1_HUMAN]	1	1	Q14974		HCD	1	0	1	1	0	3.3e-05	142	142	2.29	0	57	49	6820000	2	613.336	1225.66	0	-0.28	26.92	8665	8665	MS2	0/0	0	0	hala.raw
High	A	2	YGADALR	4003	Unambiguous	Isoleucine--tRNA ligase, cytoplasmic OS=Homo sapiens OX=9606 GN=IARS PE=1 SV=2 - [SYIC_HUMAN]	1	1	P41252		HCD	1	0	1	1	0.001	0.0144	132	145	1.54	0	16	60	3010000	2	383.198	765.389	0	0.26	26.93	8667	8667	MS2	0/0	0	0	hala.raw
High	A	2	HFRPELEER	4005	Unambiguous	NADH dehydrogenase [ubiquinone] flavoprotein 1, mitochondrial OS=Homo sapiens OX=9606 GN=NDUFV1 PE=1 SV=4 - [NDUV1_HUMAN]	1	1	P49821		HCD	1	0	1	1	0	0.000241	145	153	1.74	0	34	52	2380000	3	404.876	1212.61	0	0.94	26.93	8668	8668	MS2	0/0	0	0	hala.raw
High	A	2	IAAYGHEVGK	3363	Unambiguous	Kynureninase OS=Homo sapiens OX=9606 GN=KYNU PE=1 SV=1 - [KYNU_HUMAN]	1	1	Q16719		HCD	1	0	1	1	0.001	0.0113	199	212	1.49	0	69	60	3010000	2	522.778	1044.55	0	1.61	26.93	8671	8671	MS2	0/0	0	0	hala.raw
High	A	2	EAMEDGEIDGNK	4013	Unambiguous	Nucleolin OS=Homo sapiens OX=9606 GN=NCL PE=1 SV=3 - [NUCL_HUMAN]	1	1	P19338		HCD	1	0	1	1	0	0.00106	28	23	2.17	0	33	60	3670000	2	654.274	1307.54	0	-1.8	26.93	8672	8672	MS2	0/0	0	0	hala.raw
High	A	2	DSYVGDEAQSK	2007	Unambiguous	Actin, alpha cardiac muscle 1 OS=Homo sapiens OX=9606 GN=ACTC1 PE=1 SV=1 - [ACTC_HUMAN]|Actin, cytoplasmic 1 OS=Homo sapiens OX=9606 GN=ACTB PE=1 SV=1 - [ACTB_HUMAN]	6	2	P68032;P60709		HCD	1	0	1	1	0	5.09e-05	62	58	1.99	0	1	1	211000000	2	599.765	1198.52	0	0.5	26.95	8682	8682	MS2	0/0	0	0	hala.raw
High	A	2	NEISEMNR	3492	Unambiguous	Keratin, type II cytoskeletal 7 OS=Homo sapiens OX=9606 GN=KRT7 PE=1 SV=5 - [K2C7_HUMAN]	1	1	P08729		HCD	1	0	1	1	0	0.00608	75	77	1.9	0	29	12	11600000	2	496.728	992.448	0	1.13	26.95	8683	8683	MS2	0/0	0	0	hala.raw
High	A	2	HEQEYMEVR	4039	Unambiguous	Transmembrane emp24 domain-containing protein 2 OS=Homo sapiens OX=9606 GN=TMED2 PE=1 SV=1 - [TMED2_HUMAN]	1	1	Q15363		HCD	1	0	1	1	0	0.00103	60	50	2.37	0	39	60	7300000	2	610.771	1220.54	0	-0.65	26.96	8687	8687	MS2	0/0	0	0	hala.raw
High	A	2	IQEAGTEVVK	4041	Unambiguous	Malate dehydrogenase, mitochondrial OS=Homo sapiens OX=9606 GN=MDH2 PE=1 SV=3 - [MDHM_HUMAN]	1	1	P40926		HCD	1	0	1	1	0	0.005	237	247	1.86	0	60	34	7940000	2	537.295	1073.58	0	-1.8	26.96	8688	8688	MS2	0/0	0	0	hala.raw
High	A	2	DLEADEEDTR	4043	Unambiguous	Eukaryotic translation initiation factor 2 subunit 2 OS=Homo sapiens OX=9606 GN=EIF2S2 PE=1 SV=2 - [IF2B_HUMAN]	1	1	P20042		HCD	1	0	1	1	0	0.000118	19	26	2.24	0	47	21	11100000	2	596.751	1192.5	0	-1.21	26.97	8689	8689	MS2	0/0	0	0	hala.raw
High	A	2	MGAGLGHGMDR	4045	Unambiguous	Heterogeneous nuclear ribonucleoprotein M OS=Homo sapiens OX=9606 GN=HNRNPM PE=1 SV=3 - [HNRPM_HUMAN]	1	1	P52272		HCD	1	0	1	1	0.004	0.0573	57	45	1.87	0	31	60	4140000	3	367.835	1101.49	0	-1	26.97	8690	8690	MS2	0/0	0	0	hala.raw
Middle	A	2	SGELAQEYDK	4047	Unambiguous	Structural maintenance of chromosomes protein 1A OS=Homo sapiens OX=9606 GN=SMC1A PE=1 SV=2 - [SMC1A_HUMAN]	1	1	Q14683		HCD	1	0	1	1	0.014	0.189	110	94	1.17	0	61	60	3090000	2	570.266	1139.52	0	2.23	26.97	8691	8691	MS2	0/0	0	0	hala.raw
High	A	2	LEScGVTSDNcR	2394	Unambiguous	Ribonuclease inhibitor OS=Homo sapiens OX=9606 GN=RNH1 PE=1 SV=2 - [RINI_HUMAN]	1	1	P13489	C4(Carbamidomethyl); C11(Carbamidomethyl)	HCD	1	0	1	1	0	1.14e-05	20	19	2.36	0	19	60	1370000	2	699.293	1397.58	0	-0.11	26.98	8698	8698	MS2	0/0	0	0	hala.raw
High	A	2	VDcTAHSDVcSAQGVR	2934	Unambiguous	Thioredoxin domain-containing protein 5 OS=Homo sapiens OX=9606 GN=TXNDC5 PE=1 SV=2 - [TXND5_HUMAN]	1	1	Q8NBS9	C3(Carbamidomethyl); C10(Carbamidomethyl)	HCD	1	0	1	1	0.003	0.0458	40	37	0.97	0	0	60	891000	2	881.386	1761.76	0	0.25	26.99	8701	8701	MS2	0/0	0	0	hala.raw
High	A	2	LQDAEIAR	4069	Unambiguous	Protein S100-A6 OS=Homo sapiens OX=9606 GN=S100A6 PE=1 SV=1 - [S10A6_HUMAN]	1	1	P06703		HCD	1	0	1	1	0	0.00129	140	151	1.82	0	4	4	54600000	2	458.249	915.491	0	1.22	26.99	8703	8703	MS2	0/0	0	0	hala.raw
High	A	2	RFPGYDSESK	4071	Unambiguous	60S ribosomal protein L5 OS=Homo sapiens OX=9606 GN=RPL5 PE=1 SV=3 - [RL5_HUMAN]	1	1	P46777		HCD	1	0	1	1	0.006	0.0805	93	95	2.36	1	17	7	48800000	2	593.281	1185.55	0	1.23	26.99	8704	8704	MS2	0/0	0	0	hala.raw
High	A	2	EGIPPDQQR	1944	Unambiguous	Ubiquitin-40S ribosomal protein S27a OS=Homo sapiens OX=9606 GN=RPS27A PE=1 SV=2 - [RS27A_HUMAN]	4	1	P62979		HCD	1	0	1	1	0.004	0.0585	160	162	1.48	0	29	9	26600000	2	520.262	1039.52	0	0.72	27	8706	8706	MS2	0/0	0	0	hala.raw
High	A	2	LHKPPADSGVDLR	4075	Unambiguous	Monocarboxylate transporter 4 OS=Homo sapiens OX=9606 GN=SLC16A3 PE=1 SV=1 - [MOT4_HUMAN]	1	1	O15427		HCD	1	0	1	1	0	1.25e-05	209	207	1.94	0	54	21	7880000	3	468.925	1404.76	0	1	27	8707	8707	MS2	0/0	0	0	hala.raw
High	A	2	AEIScIDNK	4077	Unambiguous	Filamin-B OS=Homo sapiens OX=9606 GN=FLNB PE=1 SV=2 - [FLNB_HUMAN]	1	1	O75369	C5(Carbamidomethyl)	HCD	1	0	1	1	0	0.00608	124	121	1.4	0	57	19	5750000	2	525.251	1049.49	0	0.68	27	8708	8708	MS2	0/0	0	0	hala.raw
High	A	2	HLEFSHDQYR	4079	Unambiguous	Sialic acid synthase OS=Homo sapiens OX=9606 GN=NANS PE=1 SV=2 - [SIAS_HUMAN]	1	1	Q9NR45		HCD	1	0	1	1	0	0.00702	101	111	1.44	0	62	35	6100000	3	444.546	1331.62	0	7.05	27	8709	8709	MS2	0/0	0	0	hala.raw
High	A	2	NYQQNYQNSESGEK	2027	Unambiguous	Nuclease-sensitive element-binding protein 1 OS=Homo sapiens OX=9606 GN=YBX1 PE=1 SV=3 - [YBOX1_HUMAN]	1	1	P67809		HCD	1	0	1	1	0	1.27e-06	27	34	2.42	0	0	60	4590000	2	844.859	1688.71	0	-1.92	27	8710	8710	MS2	0/0	0	0	hala.raw
High	A	2	LSDIPEGK	4088	Unambiguous	Cytochrome b-c1 complex subunit Rieske, mitochondrial OS=Homo sapiens OX=9606 GN=UQCRFS1 PE=1 SV=2 - [UCRI_HUMAN]	2	1	P47985		HCD	1	0	1	1	0.003	0.0402	126	119	1.4	0	60	60	3090000	2	429.733	858.458	0	1.28	27.01	8713	8713	MS2	0/0	0	0	hala.raw
High	A	2	GPAEESSSWR	4092	Unambiguous	Eukaryotic translation initiation factor 3 subunit A OS=Homo sapiens OX=9606 GN=EIF3A PE=1 SV=1 - [EIF3A_HUMAN]	1	1	Q14152		HCD	1	0	1	1	0.003	0.0446	39	41	1.46	0	66	34	4050000	2	553.247	1105.49	0	-4.34	27.01	8715	8715	MS2	0/0	0	0	hala.raw
High	A	2	ALEATTEHIR	4094	Unambiguous	Talin-1 OS=Homo sapiens OX=9606 GN=TLN1 PE=1 SV=3 - [TLN1_HUMAN]	1	1	Q9Y490		HCD	1	0	1	1	0.007	0.102	153	167	1.83	0	61	60	3170000	2	570.804	1140.6	0	0.81	27.01	8716	8716	MS2	0/0	0	0	hala.raw
High	A	2	ALEATTEHIR	4094	Unambiguous	Talin-1 OS=Homo sapiens OX=9606 GN=TLN1 PE=1 SV=3 - [TLN1_HUMAN]	1	1	Q9Y490		HCD	1	0	1	1	0.001	0.0148	153	169	1.98	0	38	60	1650000	3	380.872	1140.6	0	0.1	27.02	8719	8719	MS2	0/0	0	0	hala.raw
High	A	2	ETMQSLNDR	1322	Unambiguous	Keratin, type I cytoskeletal 18 OS=Homo sapiens OX=9606 GN=KRT18 PE=1 SV=2 - [K1C18_HUMAN]	2	1	P05783		HCD	1	0	1	1	0	0.000423	77	59	1.98	0	38	12	13400000	2	547.252	1093.5	0	1.68	27.03	8727	8727	MS2	0/0	0	0	hala.raw
High	A	2	EMGTPDVR	4121	Unambiguous	60S ribosomal protein L31 OS=Homo sapiens OX=9606 GN=RPL31 PE=1 SV=1 - [RL31_HUMAN]	1	1	P62899		HCD	1	0	1	1	0.006	0.0888	71	80	1.5	0	26	6	38900000	2	452.714	904.421	0	2.24	27.04	8730	8730	MS2	0/0	0	0	hala.raw
High	A	2	LIEVDDERK	4123	Unambiguous	40S ribosomal protein S6 OS=Homo sapiens OX=9606 GN=RPS6 PE=1 SV=1 - [RS6_HUMAN]	1	1	P62753		HCD	1	0	1	1	0.003	0.0398	255	250	1.94	1	43	8	22500000	2	558.799	1116.59	0	1.8	27.04	8731	8731	MS2	0/0	0	0	hala.raw
High	A	2	ISSSSFSR	3579	Unambiguous	Keratin, type II cytoskeletal 8 OS=Homo sapiens OX=9606 GN=KRT8 PE=1 SV=7 - [K2C8_HUMAN]	1	1	P05787		HCD	1	0	1	1	0	0.0054	106	116	1.93	0	15	12	19400000	2	435.72	870.433	0	1.99	27.04	8732	8732	MS2	0/0	0	0	hala.raw
High	A	2	LIEVDDERK	4123	Unambiguous	40S ribosomal protein S6 OS=Homo sapiens OX=9606 GN=RPS6 PE=1 SV=1 - [RS6_HUMAN]	1	1	P62753		HCD	1	0	1	1	0.003	0.0428	255	249	1.95	1	10	28	10800000	3	372.868	1116.59	0	1.21	27.04	8733	8733	MS2	0/0	0	0	hala.raw
High	A	2	VEQIEAGTPGR	4131	Unambiguous	Thioredoxin reductase 1, cytoplasmic OS=Homo sapiens OX=9606 GN=TXNRD1 PE=1 SV=3 - [TRXR1_HUMAN]	1	1	Q16881		HCD	1	0	1	1	0	0.000211	135	157	2.6	0	32	20	9360000	2	578.801	1156.59	0	-1.05	27.04	8735	8735	MS2	0/0	0	0	hala.raw
High	A	2	ALTHIDHSLSR	4133	Unambiguous	Methionine--tRNA ligase, cytoplasmic OS=Homo sapiens OX=9606 GN=MARS PE=1 SV=2 - [SYMC_HUMAN]	1	1	P56192		HCD	1	0	1	1	0	0.000528	194	202	1.97	0	53	60	3990000	3	417.227	1249.67	0	0.78	27.05	8736	8736	MS2	0/0	0	0	hala.raw
High	A	2	ENQQATSGPNQPSVR	2078	Unambiguous	Y-box-binding protein 3 OS=Homo sapiens OX=9606 GN=YBX3 PE=1 SV=4 - [YBOX3_HUMAN]	1	1	P16989		HCD	1	0	1	1	0	0.000502	149	144	2.51	0	9	60	2000000	2	806.889	1612.77	0	1.55	27.05	8739	8739	MS2	0/0	0	0	hala.raw
High	A	2	ScYDLScHAR	3381	Unambiguous	Glycine--tRNA ligase OS=Homo sapiens OX=9606 GN=GARS PE=1 SV=3 - [GARS_HUMAN]	1	1	P41250	C2(Carbamidomethyl); C7(Carbamidomethyl)	HCD	1	0	1	1	0	0.00243	25	17	1.76	0	78	60	1950000	3	423.51	1268.52	0	0.4	27.05	8740	8740	MS2	0/0	0	0	hala.raw
High	A	2	MDSTEPPYSQK	3613	Unambiguous	Elongation factor 1-alpha 1 OS=Homo sapiens OX=9606 GN=EEF1A1 PE=1 SV=1 - [EF1A1_HUMAN]	2	1	P68104		HCD	1	0	1	1	0	0.000383	69	54	1.71	0	23	60	9780000	2	641.785	1282.56	0	0.11	27.06	8743	8743	MS2	0/0	0	0	hala.raw
High	A	2	IEYNDQNDGScDVK	3599	Unambiguous	Filamin-B OS=Homo sapiens OX=9606 GN=FLNB PE=1 SV=2 - [FLNB_HUMAN]	1	1	O75369	C11(Carbamidomethyl)	HCD	1	0	1	1	0	0.00462	16	23	1.55	0	46	60	2110000	2	828.845	1656.68	0	0.91	27.06	8745	8745	MS2	0/0	0	0	hala.raw
High	A	2	LFQEccPHSTDR	4152	Unambiguous	Heterogeneous nuclear ribonucleoprotein K OS=Homo sapiens OX=9606 GN=HNRNPK PE=1 SV=1 - [HNRPK_HUMAN]	1	1	P61978	C5(Carbamidomethyl); C6(Carbamidomethyl)	HCD	1	0	1	1	0	0.000802	37	19	2.01	0	37	5	39300000	3	517.223	1549.66	0	1.91	27.06	8746	8746	MS2	0/0	0	0	hala.raw
High	A	2	ELSEQIQR	4156	Unambiguous	Ezrin OS=Homo sapiens OX=9606 GN=EZR PE=1 SV=4 - [EZRI_HUMAN]	1	1	P15311		HCD	1	0	1	1	0	0.00735	186	188	1.91	0	35	11	14000000	2	501.765	1002.52	0	0.53	27.07	8748	8748	MS2	0/0	0	0	hala.raw
High	A	2	LTVAENEAETK	4158	Unambiguous	Bifunctional glutamate/proline--tRNA ligase OS=Homo sapiens OX=9606 GN=EPRS PE=1 SV=5 - [SYEP_HUMAN]	1	1	P07814		HCD	1	0	1	1	0.001	0.0133	255	251	1.41	0	52	9	9960000	2	602.812	1204.62	0.01	9.53	27.07	8749	8749	MS2	0/0	0	0	hala.raw
High	A	2	DEFTNTcPSDK	4160	Unambiguous	Chloride intracellular channel protein 4 OS=Homo sapiens OX=9606 GN=CLIC4 PE=1 SV=4 - [CLIC4_HUMAN]	1	1	Q9Y696	C7(Carbamidomethyl)	HCD	1	0	1	1	0	0.00056	16	19	1.97	0	27	60	5290000	2	657.269	1313.53	0	0.14	27.07	8750	8750	MS2	0/0	0	0	hala.raw
High	A	2	STESLQANVQR	4166	Unambiguous	60S ribosomal protein L13 OS=Homo sapiens OX=9606 GN=RPL13 PE=1 SV=4 - [RL13_HUMAN]	1	1	P26373		HCD	1	0	1	1	0	0.000101	218	225	2.43	0	42	12	29300000	2	616.815	1232.62	0	0.37	27.07	8753	8753	MS2	0/0	0	0	hala.raw
High	A	2	cGVcEVcQQPEcGK	4179	Unambiguous	DNA (cytosine-5)-methyltransferase 1 OS=Homo sapiens OX=9606 GN=DNMT1 PE=1 SV=2 - [DNMT1_HUMAN]	1	1	P26358	C1(Carbamidomethyl); C4(Carbamidomethyl); C7(Carbamidomethyl); C12(Carbamidomethyl)	HCD	1	0	1	1	0.004	0.0522	7	8	1.17	0	0	60	966000	2	855.841	1710.68	0	2.92	27.08	8759	8759	MS2	0/0	0	0	hala.raw
High	A	2	DIIHDPGR	4191	Unambiguous	60S ribosomal protein L8 OS=Homo sapiens OX=9606 GN=RPL8 PE=1 SV=2 - [RL8_HUMAN]	1	1	P62917		HCD	1	0	1	1	0.001	0.0113	152	153	1.44	0	44	13	12400000	2	461.741	922.474	0	0.02	27.1	8766	8766	MS2	0/0	0	0	hala.raw
High	A	2	EVSSATNALR	4193	Unambiguous	U1 small nuclear ribonucleoprotein A OS=Homo sapiens OX=9606 GN=SNRPA PE=1 SV=3 - [SNRPA_HUMAN]	1	1	P09012		HCD	1	0	1	1	0	0.00164	210	232	2.3	0	29	25	12200000	2	524.276	1047.54	0	0.75	27.1	8767	8767	MS2	0/0	0	0	hala.raw
High	A	2	EVAEAATGEDASSPPPK	3183	Unambiguous	Synaptic vesicle membrane protein VAT-1 homolog OS=Homo sapiens OX=9606 GN=VAT1 PE=1 SV=2 - [VAT1_HUMAN]	1	1	Q99536		HCD	1	0	1	1	0.003	0.043	119	129	1.14	0	48	60	1960000	2	828.391	1655.77	0	-1.21	27.11	8775	8775	MS2	0/0	0	0	hala.raw
High	A	2	QNQTTSAVSTPASSETSK	2992	Unambiguous	E3 SUMO-protein ligase RanBP2 OS=Homo sapiens OX=9606 GN=RANBP2 PE=1 SV=2 - [RBP2_HUMAN]	1	1	P49792		HCD	1	0	1	1	0.002	0.0336	134	143	1.11	0	0	60	1010000	2	912.435	1823.86	0	0.03	27.11	8778	8778	MS2	0/0	0	0	hala.raw
High	A	2	NHEEEMNALR	1245	Unambiguous	Keratin, type I cytoskeletal 17 OS=Homo sapiens OX=9606 GN=KRT17 PE=1 SV=2 - [K1C17_HUMAN]	2	1	Q04695		HCD	1	0	1	1	0	0.000159	54	45	2.39	0	19	14	15600000	2	621.78	1242.55	0	-0.16	27.12	8781	8781	MS2	0/0	0	0	hala.raw
High	A	2	LMELHGEGSSSGK	4080	Unambiguous	40S ribosomal protein S3a OS=Homo sapiens OX=9606 GN=RPS3A PE=1 SV=2 - [RS3A_HUMAN]	1	1	P61247		HCD	1	0	1	1	0	0.00181	104	116	1.82	0	26	60	6120000	2	666.317	1331.63	0	-0.21	27.12	8782	8782	MS2	0/0	0	0	hala.raw
High	A	2	VDNLTYR	4222	Unambiguous	Serine/arginine-rich splicing factor 2 OS=Homo sapiens OX=9606 GN=SRSF2 PE=1 SV=4 - [SRSF2_HUMAN]	2	1	Q01130		HCD	1	0	1	1	0.002	0.0334	155	158	1.84	0	18	17	14600000	2	440.73	880.454	0	1.51	27.13	8784	8784	MS2	0/0	0	0	hala.raw
High	A	2	NQGGYGGSSSSSSYGSGR	1600	Unambiguous	Heterogeneous nuclear ribonucleoprotein A1 OS=Homo sapiens OX=9606 GN=HNRNPA1 PE=1 SV=5 - [ROA1_HUMAN]	1	1	P09651		HCD	1	0	1	1	0	3.24e-10	17	14	4.04	0	4	60	11000000	2	847.854	1694.7	0	0.92	27.13	8785	8785	MS2	0/0	0	0	hala.raw
High	A	2	HQGVMVGMGQK	4226	Unambiguous	Actin, alpha cardiac muscle 1 OS=Homo sapiens OX=9606 GN=ACTC1 PE=1 SV=1 - [ACTC_HUMAN]|Beta-actin-like protein 2 OS=Homo sapiens OX=9606 GN=ACTBL2 PE=1 SV=2 - [ACTBL_HUMAN]|Actin, cytoplasmic 1 OS=Homo sapiens OX=9606 GN=ACTB PE=1 SV=1 - [ACTB_HUMAN]	7	3	P68032;Q562R1;P60709		HCD	1	0	1	1	0	5.3e-07	125	121	2.78	0	12	60	7650000	2	586.289	1171.57	0	-0.35	27.13	8786	8786	MS2	0/0	0	0	hala.raw
Middle	A	2	HSIHWPcR	4232	Unambiguous	X-ray repair cross-complementing protein 5 OS=Homo sapiens OX=9606 GN=XRCC5 PE=1 SV=3 - [XRCC5_HUMAN]	1	1	P13010	C7(Carbamidomethyl)	HCD	1	0	1	1	0.014	0.186	134	132	1.54	0	10	60	1250000	3	364.844	1092.52	0	0.39	27.14	8789	8789	MS2	0/0	0	0	hala.raw
High	A	2	ADTQTYQPYNK	3664	Unambiguous	Enhancer of rudimentary homolog OS=Homo sapiens OX=9606 GN=ERH PE=1 SV=1 - [ERH_HUMAN]	1	1	P84090		HCD	1	0	1	1	0.001	0.02	74	78	1.56	0	12	60	4160000	2	664.81	1328.61	0	0.37	27.14	8791	8791	MS2	0/0	0	0	hala.raw
High	A	2	LPNYDAR	4238	Unambiguous	DNA topoisomerase 2-beta OS=Homo sapiens OX=9606 GN=TOP2B PE=1 SV=3 - [TOP2B_HUMAN]	1	1	Q02880		HCD	1	0	1	1	0.003	0.037	161	168	1.81	0	61	48	2470000	2	424.717	848.427	0	0.52	27.14	8792	8792	MS2	0/0	0	0	hala.raw
High	A	2	KPFEEHWR	4240	Unambiguous	Succinate dehydrogenase [ubiquinone] flavoprotein subunit, mitochondrial OS=Homo sapiens OX=9606 GN=SDHA PE=1 SV=2 - [SDHA_HUMAN]	1	1	P31040		HCD	1	0	1	1	0	0.00339	157	140	2.19	0	30	60	2120000	3	376.858	1128.56	0	-0.42	27.14	8793	8793	MS2	0/0	0	0	hala.raw
High	A	2	ITESEEVVSR	4250	Unambiguous	Prelamin-A/C OS=Homo sapiens OX=9606 GN=LMNA PE=1 SV=1 - [LMNA_HUMAN]	1	1	P02545		HCD	1	0	1	1	0	6.57e-05	212	222	2.53	0	3	6	45600000	2	574.795	1148.58	0	2.43	27.16	8799	8799	MS2	0/0	0	0	hala.raw
High	A	2	AFHNEAQVNPER	3065	Unambiguous	T-complex protein 1 subunit alpha OS=Homo sapiens OX=9606 GN=TCP1 PE=1 SV=1 - [TCPA_HUMAN]	1	1	P17987		HCD	1	0	1	1	0	0.00446	126	122	2.36	0	41	21	14700000	3	471.229	1411.67	0	1.04	27.16	8800	8800	MS2	0/0	0	0	hala.raw
High	A	2	NIIHGSDSVESAEK	4256	Unambiguous	Nucleoside diphosphate kinase A OS=Homo sapiens OX=9606 GN=NME1 PE=1 SV=1 - [NDKA_HUMAN]	1	1	P15531		HCD	1	0	1	1	0	0.000605	137	146	2.41	0	9	11	33100000	3	495.912	1485.72	0	1.4	27.16	8802	8802	MS2	0/0	0	0	hala.raw
High	A	2	NIIHGSDSVESAEK	4256	Unambiguous	Nucleoside diphosphate kinase A OS=Homo sapiens OX=9606 GN=NME1 PE=1 SV=1 - [NDKA_HUMAN]	1	1	P15531		HCD	1	0	1	1	0	1.2e-05	136	146	2.54	0	25	13	25600000	2	743.364	1485.72	0	1.58	27.16	8803	8803	MS2	0/0	0	0	hala.raw
High	A	2	HQGVMVGMGQK	4226	Unambiguous	Actin, alpha cardiac muscle 1 OS=Homo sapiens OX=9606 GN=ACTC1 PE=1 SV=1 - [ACTC_HUMAN]|Beta-actin-like protein 2 OS=Homo sapiens OX=9606 GN=ACTBL2 PE=1 SV=2 - [ACTBL_HUMAN]|Actin, cytoplasmic 1 OS=Homo sapiens OX=9606 GN=ACTB PE=1 SV=1 - [ACTB_HUMAN]	7	3	P68032;Q562R1;P60709		HCD	1	0	1	1	0.005	0.0715	120	109	2.3	0	36	60	2680000	3	391.196	1171.57	0	1.31	27.16	8804	8804	MS2	0/0	0	0	hala.raw
High	A	2	NNFEGEVTK	4262	Unambiguous	Protein disulfide-isomerase OS=Homo sapiens OX=9606 GN=P4HB PE=1 SV=3 - [PDIA1_HUMAN]	1	1	P07237		HCD	1	0	1	1	0	0.00442	131	146	1.43	0	34	19	15500000	2	519.25	1037.49	0	1.82	27.17	8805	8805	MS2	0/0	0	0	hala.raw
High	A	2	MEELHNQEMQK	3020	Unambiguous	Splicing factor, proline- and glutamine-rich OS=Homo sapiens OX=9606 GN=SFPQ PE=1 SV=2 - [SFPQ_HUMAN]	1	1	P23246		HCD	1	0	1	1	0.002	0.0256	63	66	2.46	0	21	60	2120000	2	708.818	1416.63	0	3.53	27.17	8810	8810	MS2	0/0	0	0	hala.raw
Middle	A	2	YALTGDEVKK	4274	Unambiguous	40S ribosomal protein S4, X isoform OS=Homo sapiens OX=9606 GN=RPS4X PE=1 SV=2 - [RS4X_HUMAN]	3	1	P62701		HCD	1	0	1	1	0.014	0.19	154	162	1.92	1	24	60	1490000	3	375.206	1123.6	0	3.33	27.18	8812	8812	MS2	0/0	0	0	hala.raw
High	A	2	AAHSEGNTTAGLDMR	4285	Unambiguous	T-complex protein 1 subunit beta OS=Homo sapiens OX=9606 GN=CCT2 PE=1 SV=4 - [TCPB_HUMAN]	1	1	P78371		HCD	1	0	1	1	0	0.00228	93	93	1.72	0	32	24	9860000	3	510.905	1530.7	0	2.56	27.19	8817	8817	MS2	0/0	0	0	hala.raw
High	A	2	ATAPQTQHVSPMR	3073	Unambiguous	Elongation factor 1-delta OS=Homo sapiens OX=9606 GN=EEF1D PE=1 SV=5 - [EF1D_HUMAN]	1	1	P29692		HCD	1	0	1	1	0	0.0013	183	199	2.02	0	43	60	4320000	3	475.243	1423.71	0	2.04	27.19	8818	8818	MS2	0/0	0	0	hala.raw
High	A	2	TQASSSFQDSSQPAGK	2684	Unambiguous	Probable 28S rRNA (cytosine(4447)-C(5))-methyltransferase OS=Homo sapiens OX=9606 GN=NOP2 PE=1 SV=2 - [NOP2_HUMAN]	1	1	P46087		HCD	1	0	1	1	0.002	0.0248	106	119	1.36	0	0	60	1840000	2	813.376	1625.75	0	2.96	27.19	8821	8821	MS2	0/0	0	0	hala.raw
High	A	2	IANPVEGSSGR	4301	Unambiguous	Poly(rC)-binding protein 1 OS=Homo sapiens OX=9606 GN=PCBP1 PE=1 SV=2 - [PCBP1_HUMAN]	1	1	Q15365		HCD	1	0	1	1	0	2.17e-06	156	145	2.71	0	19	8	21800000	2	543.78	1086.55	0	-0.89	27.21	8827	8827	MS2	0/0	0	0	hala.raw
High	A	2	LLETTDRPDGHQNNLR	4303	Unambiguous	Importin subunit beta-1 OS=Homo sapiens OX=9606 GN=KPNB1 PE=1 SV=2 - [IMB1_HUMAN]	1	1	Q14974		HCD	1	0	1	1	0	6.71e-06	190	204	2.99	0	36	57	11600000	3	626.986	1878.94	0	0.85	27.21	8828	8828	MS2	0/0	0	0	hala.raw
High	A	2	NHEEEISTLR	4305	Unambiguous	Keratin, type I cytoskeletal 19 OS=Homo sapiens OX=9606 GN=KRT19 PE=1 SV=4 - [K1C19_HUMAN]	1	1	P08727		HCD	1	0	1	1	0	0.00239	116	128	2.59	0	37	25	11700000	2	614.302	1227.6	0	0.92	27.21	8829	8829	MS2	0/0	0	0	hala.raw
High	A	2	ESEPQAAAEPAEAK	2735	Unambiguous	Brain acid soluble protein 1 OS=Homo sapiens OX=9606 GN=BASP1 PE=1 SV=2 - [BASP1_HUMAN]	1	1	P80723		HCD	1	0	1	1	0	6.74e-05	91	96	1.79	0	5	20	18700000	2	714.337	1427.67	0	1.03	27.22	8831	8831	MS2	0/0	0	0	hala.raw
High	A	2	GPAYGLSR	4309	Unambiguous	Transgelin-2 OS=Homo sapiens OX=9606 GN=TAGLN2 PE=1 SV=3 - [TAGL2_HUMAN]	1	1	P37802		HCD	1	0	1	1	0.003	0.0416	195	184	1.93	0	28	24	10400000	2	410.72	820.433	0	1.62	27.22	8832	8832	MS2	0/0	0	0	hala.raw
Middle	A	2	QYGFcK	4311	Unambiguous	Alpha-2-HS-glycoprotein OS=Homo sapiens OX=9606 GN=AHSG PE=1 SV=2 - [FETUA_HUMAN]	1	1	P02765	C5(Carbamidomethyl)	HCD	1	0	1	1	0.04	0.407	24	32	1.28	0	57	54	3480000	2	401.682	802.356	0	1.54	27.22	8833	8833	MS2	0/0	0	0	hala.raw
High	A	2	LLETTDRPDGHQNNLR	4303	Unambiguous	Importin subunit beta-1 OS=Homo sapiens OX=9606 GN=KPNB1 PE=1 SV=2 - [IMB1_HUMAN]	1	1	Q14974		HCD	1	0	1	1	0	1.52e-06	208	222	2.5	0	19	22	13900000	4	470.492	1878.94	0	1.65	27.23	8835	8835	MS2	0/0	0	0	hala.raw
Middle	A	2	HWDHLTQVK	4315	Unambiguous	Enoyl-CoA hydratase, mitochondrial OS=Homo sapiens OX=9606 GN=ECHS1 PE=1 SV=4 - [ECHM_HUMAN]	1	1	P30084		HCD	1	0	1	1	0.01	0.14	236	218	1.97	0	16	56	3970000	3	388.537	1163.6	0	1.75	27.23	8836	8836	MS2	0/0	0	0	hala.raw
High	A	2	TPcNAGTFSQPEK	4319	Unambiguous	Mitotic checkpoint protein BUB3 OS=Homo sapiens OX=9606 GN=BUB3 PE=1 SV=1 - [BUB3_HUMAN]	1	1	O43684	C3(Carbamidomethyl)	HCD	1	0	1	1	0	0.000112	94	93	2.81	0	38	60	8070000	2	718.829	1436.65	0	1.61	27.23	8838	8838	MS2	0/0	0	0	hala.raw
High	A	2	GFDQDMANK	4321	Unambiguous	Thioredoxin reductase 1, cytoplasmic OS=Homo sapiens OX=9606 GN=TXNRD1 PE=1 SV=3 - [TRXR1_HUMAN]	1	1	Q16881		HCD	1	0	1	1	0.002	0.0262	43	49	1.39	0	52	36	5270000	2	513.223	1025.44	0	2.37	27.23	8839	8839	MS2	0/0	0	0	hala.raw
High	A	2	QSVENDIHGLRK	4325	Unambiguous	Keratin, type I cytoskeletal 18 OS=Homo sapiens OX=9606 GN=KRT18 PE=1 SV=2 - [K1C18_HUMAN]	1	1	P05783		HCD	1	0	1	1	0.002	0.0298	178	158	2.02	1	36	60	3960000	2	698.37	1395.73	0	-0.54	27.24	8842	8842	MS2	0/0	0	0	hala.raw
Middle	A	2	GQEcEYPPTQDGR	3687	Unambiguous	Methionine aminopeptidase 2 OS=Homo sapiens OX=9606 GN=METAP2 PE=1 SV=1 - [MAP2_HUMAN]	1	1	P50579	C4(Carbamidomethyl)	HCD	1	0	1	2	0.017	0.225	30	25	1.07	0	89	60	408000	2	768.826	1536.65	0	4.41	27.24	8843	8843	MS2	0/0	0	0	hala.raw
High	A	2	YKPESEELTAER	4331	Unambiguous	Protein disulfide-isomerase OS=Homo sapiens OX=9606 GN=P4HB PE=1 SV=3 - [PDIA1_HUMAN]	1	1	P07237		HCD	1	0	1	1	0	0.00396	183	160	1.85	0	33	60	8790000	2	726.356	1451.71	0	2.62	27.25	8845	8845	MS2	0/0	0	0	hala.raw
High	A	2	MRPGVAcSVSQAQK	3299	Unambiguous	60S ribosomal protein L9 OS=Homo sapiens OX=9606 GN=RPL9 PE=1 SV=1 - [RL9_HUMAN]	1	1	P32969	C7(Carbamidomethyl)	HCD	1	0	1	1	0	7.93e-05	199	190	2.93	0	44	28	7490000	3	506.923	1518.75	0	1.69	27.26	8850	8850	MS2	0/0	0	0	hala.raw
High	A	2	YLAEVAAGDDKK	4341	Unambiguous	14-3-3 protein zeta/delta OS=Homo sapiens OX=9606 GN=YWHAZ PE=1 SV=1 - [1433Z_HUMAN]	1	1	P63104		HCD	1	0	1	1	0	3.56e-05	194	196	2.79	1	18	56	15200000	2	640.33	1279.65	0	0.54	27.26	8851	8851	MS2	0/0	0	0	hala.raw
High	A	2	NMMAAcDPR	4343	Unambiguous	Tubulin beta-2A chain OS=Homo sapiens OX=9606 GN=TUBB2A PE=1 SV=1 - [TBB2A_HUMAN]|Tubulin beta-3 chain OS=Homo sapiens OX=9606 GN=TUBB3 PE=1 SV=2 - [TBB3_HUMAN]|Tubulin beta-4A chain OS=Homo sapiens OX=9606 GN=TUBB4A PE=1 SV=2 - [TBB4A_HUMAN]|Tubulin beta-4B chain OS=Homo sapiens OX=9606 GN=TUBB4B PE=1 SV=1 - [TBB4B_HUMAN]|Tubulin beta chain OS=Homo sapiens OX=9606 GN=TUBB PE=1 SV=2 - [TBB5_HUMAN…	9	3	P68371;P07437;Q9BUF5	C6(Carbamidomethyl)	HCD	1	0	1	1	0.001	0.0109	14	13	1.92	0	19	3	80800000	2	533.218	1065.43	0	1.63	27.26	8852	8852	MS2	0/0	0	0	hala.raw
High	A	2	SPPGQVTEAVK	4345	Unambiguous	Aldose reductase OS=Homo sapiens OX=9606 GN=AKR1B1 PE=1 SV=3 - [ALDR_HUMAN]	1	1	P15121		HCD	1	0	1	1	0	0.00134	127	117	1.75	0	33	27	10600000	2	556.8	1112.59	0	-1	27.26	8853	8853	MS2	0/0	0	0	hala.raw
High	A	2	SEENEEPMETDQNAK	2895	Unambiguous	Heat shock 70 kDa protein 4 OS=Homo sapiens OX=9606 GN=HSPA4 PE=1 SV=4 - [HSP74_HUMAN]	1	1	P34932		HCD	1	0	1	1	0	2.13e-05	20	17	2.07	0	0	60	1720000	2	875.859	1750.71	0	1.76	27.27	8859	8859	MS2	0/0	0	0	hala.raw
High	A	2	MRPGVAcSVSQAQK	3299	Unambiguous	60S ribosomal protein L9 OS=Homo sapiens OX=9606 GN=RPL9 PE=1 SV=1 - [RL9_HUMAN]	1	1	P32969	C7(Carbamidomethyl)	HCD	1	0	1	1	0	0.00034	192	184	2.95	0	32	60	6040000	2	759.88	1518.75	0	0.81	27.28	8861	8861	MS2	0/0	0	0	hala.raw
High	A	2	SGAQASSTPLSPTR	4368	Unambiguous	Prelamin-A/C OS=Homo sapiens OX=9606 GN=LMNA PE=1 SV=1 - [LMNA_HUMAN]	1	1	P02545		HCD	1	0	1	1	0	1.63e-05	187	200	2.72	0	40	22	13600000	2	680.35	1359.69	0	5.38	27.29	8864	8864	MS2	0/0	0	0	hala.raw
High	A	2	LAGESESNLR	3433	Unambiguous	Transitional endoplasmic reticulum ATPase OS=Homo sapiens OX=9606 GN=VCP PE=1 SV=4 - [TERA_HUMAN]	1	1	P55072		HCD	1	0	1	1	0.003	0.0445	213	189	1.57	0	73	16	6350000	2	538.274	1075.54	0	2.05	27.29	8866	8866	MS2	0/0	0	0	hala.raw
High	A	2	ETPAATEAPSSTPK	2813	Unambiguous	Brain acid soluble protein 1 OS=Homo sapiens OX=9606 GN=BASP1 PE=1 SV=2 - [BASP1_HUMAN]	1	1	P80723		HCD	1	0	1	1	0	1.24e-06	141	135	2.44	0	13	19	19000000	2	693.841	1386.68	0	0.67	27.29	8868	8868	MS2	0/0	0	0	hala.raw
Middle	A	2	DcVGPEVEK	3329	Unambiguous	Phosphoglycerate kinase 1 OS=Homo sapiens OX=9606 GN=PGK1 PE=1 SV=3 - [PGK1_HUMAN]	1	1	P00558	C2(Carbamidomethyl)	HCD	1	0	1	1	0.024	0.277	51	51	1.23	0	47	7	21600000	2	516.737	1032.47	0	0.62	27.3	8869	8869	MS2	0/0	0	0	hala.raw
High	A	2	DGEEAGAYDGPR	3857	Unambiguous	Protein disulfide-isomerase A3 OS=Homo sapiens OX=9606 GN=PDIA3 PE=1 SV=4 - [PDIA3_HUMAN]	1	1	P30101		HCD	1	0	1	1	0	0.0017	27	18	2.17	0	70	60	5090000	2	618.76	1236.51	0	0.74	27.3	8870	8870	MS2	0/0	0	0	hala.raw
High	A	2	YLSEVASGDNK	4380	Unambiguous	14-3-3 protein beta/alpha OS=Homo sapiens OX=9606 GN=YWHAB PE=1 SV=3 - [1433B_HUMAN]	1	1	P31946		HCD	1	0	1	1	0	0.00531	132	132	1.72	0	38	3	45300000	2	591.782	1182.56	0	-5.56	27.3	8871	8871	MS2	0/0	0	0	hala.raw
High	A	2	QVSDDLTER	4382	Unambiguous	Prohibitin OS=Homo sapiens OX=9606 GN=PHB PE=1 SV=1 - [PHB_HUMAN]	1	1	P35232		HCD	1	0	1	1	0	0.00115	114	122	2.03	0	26	10	12200000	2	531.756	1062.5	0	-1.92	27.3	8872	8872	MS2	0/0	0	0	hala.raw
High	A	2	QQEVETELK	4384	Unambiguous	U1 small nuclear ribonucleoprotein 70 kDa OS=Homo sapiens OX=9606 GN=SNRNP70 PE=1 SV=2 - [RU17_HUMAN]	1	1	P08621		HCD	1	0	1	1	0	0.00588	231	236	2.03	0	52	60	4390000	2	552.283	1103.56	0	0.74	27.3	8873	8873	MS2	0/0	0	0	hala.raw
High	A	2	LAQALHEMR	4386	Unambiguous	Lamin-B1 OS=Homo sapiens OX=9606 GN=LMNB1 PE=1 SV=2 - [LMNB1_HUMAN]	1	1	P20700		HCD	1	0	1	1	0	0.000263	132	144	2.21	0	11	60	1160000	3	356.859	1068.56	0	1.11	27.3	8874	8874	MS2	0/0	0	0	hala.raw
High	A	2	EVVEEAENGR	2307	Unambiguous	Prothymosin alpha OS=Homo sapiens OX=9606 GN=PTMA PE=1 SV=2 - [PTMA_HUMAN]	1	1	P06454		HCD	1	0	1	1	0	0.000144	99	106	2.51	0	26	8	32500000	2	566.268	1131.53	0	0.46	27.3	8875	8875	MS2	0/0	0	0	hala.raw
High	A	2	ESFDGSVR	3733	Unambiguous	Nucleolin OS=Homo sapiens OX=9606 GN=NCL PE=1 SV=3 - [NUCL_HUMAN]	1	1	P19338		HCD	1	0	1	1	0	0.00965	80	81	1.67	0	59	31	5210000	2	448.709	896.411	0	0.47	27.31	8876	8876	MS2	0/0	0	0	hala.raw
High	A	2	TVLDQQQTPSR	3859	Unambiguous	Leucine-rich PPR motif-containing protein, mitochondrial OS=Homo sapiens OX=9606 GN=LRPPRC PE=1 SV=3 - [LPPRC_HUMAN]	1	1	P42704		HCD	1	0	1	1	0	0.00877	209	194	1.43	0	33	60	2570000	2	636.831	1272.65	0	0.23	27.31	8879	8879	MS2	0/0	0	0	hala.raw
High	A	2	RDIQENDEEAVQVK	4396	Unambiguous	26S proteasome non-ATPase regulatory subunit 11 OS=Homo sapiens OX=9606 GN=PSMD11 PE=1 SV=3 - [PSD11_HUMAN]	1	1	O00231		HCD	1	0	1	1	0.003	0.0346	175	184	1.86	1	17	60	1690000	2	836.911	1672.81	0	0.23	27.31	8880	8880	MS2	0/0	0	0	hala.raw
High	A	2	SEDDESGAGELTR	3767	Unambiguous	DNA replication licensing factor MCM7 OS=Homo sapiens OX=9606 GN=MCM7 PE=1 SV=4 - [MCM7_HUMAN]	1	1	P33993		HCD	1	0	1	1	0	0.00303	21	21	1.37	0	20	60	1600000	2	683.289	1365.57	0	-4.97	27.31	8881	8881	MS2	0/0	0	0	hala.raw
High	A	2	TPGPGAQSALR	3894	Unambiguous	40S ribosomal protein S14 OS=Homo sapiens OX=9606 GN=RPS14 PE=1 SV=3 - [RS14_HUMAN]	1	1	P62263		HCD	1	0	1	1	0	0.00962	160	161	1.45	0	39	7	18300000	2	527.787	1054.57	0	3.1	27.33	8886	8886	MS2	0/0	0	0	hala.raw
High	A	2	ADMETLQR	4407	Unambiguous	Threonine--tRNA ligase, cytoplasmic OS=Homo sapiens OX=9606 GN=TARS PE=1 SV=3 - [SYTC_HUMAN]	1	1	P26639		HCD	1	0	1	1	0	0.0042	143	155	1.71	0	33	9	15300000	2	482.234	963.461	0	4.7	27.33	8887	8887	MS2	0/0	0	0	hala.raw
High	A	2	NILDSKPTANK	4409	Unambiguous	Coronin-1C OS=Homo sapiens OX=9606 GN=CORO1C PE=1 SV=1 - [COR1C_HUMAN]	1	1	Q9ULV4		HCD	1	0	1	1	0	2.11e-05	208	212	2.66	0	31	60	2360000	3	400.891	1200.66	0	1.29	27.33	8888	8888	MS2	0/0	0	0	hala.raw
High	A	2	EAQELSQNSAIK	4411	Unambiguous	Nucleolar RNA helicase 2 OS=Homo sapiens OX=9606 GN=DDX21 PE=1 SV=5 - [DDX21_HUMAN]	1	1	Q9NR30		HCD	1	0	1	1	0	0.000112	219	210	2.44	0	26	60	4350000	2	659.337	1317.67	0	2.17	27.33	8889	8889	MS2	0/0	0	0	hala.raw
High	A	2	APKPDGPGGGPGGSHMGGNYGDDR	1814	Unambiguous	RNA-binding protein FUS OS=Homo sapiens OX=9606 GN=FUS PE=1 SV=1 - [FUS_HUMAN]	1	1	P35637		HCD	1	0	1	1	0	1.6e-05	22	30	2.51	0	21	60	2660000	3	751.663	2252.98	0	0.68	27.33	8890	8890	MS2	0/0	0	0	hala.raw
High	A	2	VDNSSLTGESEPQTR	4415	Unambiguous	Sodium/potassium-transporting ATPase subunit alpha-1 OS=Homo sapiens OX=9606 GN=ATP1A1 PE=1 SV=1 - [AT1A1_HUMAN]|Potassium-transporting ATPase alpha chain 1 OS=Homo sapiens OX=9606 GN=ATP4A PE=2 SV=5 - [ATP4A_HUMAN]	4	2	P05023;P20648		HCD	1	0	1	1	0	1.16e-05	113	121	2.28	0	0	60	2990000	2	810.381	1619.75	0	2.47	27.34	8891	8891	MS2	0/0	0	0	hala.raw
Middle	A	2	NHEEEMNALR	1245	Unambiguous	Keratin, type I cytoskeletal 17 OS=Homo sapiens OX=9606 GN=KRT17 PE=1 SV=2 - [K1C17_HUMAN]	2	1	Q04695		HCD	1	0	1	1	0.016	0.215	59	55	2.15	0	44	60	2890000	3	414.857	1242.56	0	1.48	27.34	8892	8892	MS2	0/0	0	0	hala.raw
High	A	2	VMATTGGTNLR	4423	Unambiguous	Probable ATP-dependent RNA helicase DDX6 OS=Homo sapiens OX=9606 GN=DDX6 PE=1 SV=2 - [DDX6_HUMAN]	1	1	P26196		HCD	1	0	1	1	0	0.00547	202	192	1.65	0	45	18	7790000	2	560.793	1120.58	0	1.48	27.35	8898	8898	MS2	0/0	0	0	hala.raw
High	A	2	DPAEGDGAQPEETPR	2690	Unambiguous	Neutral alpha-glucosidase AB OS=Homo sapiens OX=9606 GN=GANAB PE=1 SV=3 - [GANAB_HUMAN]	1	1	Q14697		HCD	1	0	1	1	0	1.59e-08	49	52	3.24	0	63	60	5990000	2	784.844	1568.68	0	-1.16	27.35	8899	8899	MS2	0/0	0	0	hala.raw
High	A	2	EAKPDELMDSK	4429	Unambiguous	Vesicle-associated membrane protein-associated protein A OS=Homo sapiens OX=9606 GN=VAPA PE=1 SV=3 - [VAPA_HUMAN]	1	1	Q9P0L0		HCD	1	0	1	1	0.001	0.0177	129	132	1.54	0	47	60	4190000	2	631.802	1262.6	0	3.04	27.36	8901	8901	MS2	0/0	0	0	hala.raw
High	A	2	LcTSATESEVAR	4431	Unambiguous	Cytochrome b-c1 complex subunit 1, mitochondrial OS=Homo sapiens OX=9606 GN=UQCRC1 PE=1 SV=3 - [QCR1_HUMAN]	1	1	P31930	C2(Carbamidomethyl)	HCD	1	0	1	1	0	4.31e-05	148	148	2.41	0	48	60	2340000	2	662.316	1323.62	0	2.25	27.36	8904	8904	MS2	0/0	0	0	hala.raw
High	A	2	IVAVTGAEAQK	4435	Unambiguous	Alanine--tRNA ligase, cytoplasmic OS=Homo sapiens OX=9606 GN=AARS PE=1 SV=2 - [SYAC_HUMAN]	1	1	P49588		HCD	1	0	1	1	0	0.00213	254	241	1.66	0	46	6	19900000	2	543.812	1086.62	0	1.79	27.37	8906	8906	MS2	0/0	0	0	hala.raw
High	A	2	NMSVIAHVDHGK	4445	Unambiguous	Elongation factor 2 OS=Homo sapiens OX=9606 GN=EEF2 PE=1 SV=4 - [EF2_HUMAN]	1	1	P13639		HCD	1	0	1	1	0	0.00145	205	194	2.38	0	28	9	18800000	3	436.556	1307.65	0	1.81	27.38	8913	8913	MS2	0/0	0	0	hala.raw
High	A	2	ANAQAAALYK	4447	Unambiguous	Macrophage-capping protein OS=Homo sapiens OX=9606 GN=CAPG PE=1 SV=2 - [CAPG_HUMAN]	1	1	P40121		HCD	1	0	1	1	0	0.00203	266	267	1.91	0	49	17	9920000	2	510.778	1020.55	0	1.95	27.39	8914	8914	MS2	0/0	0	0	hala.raw
High	A	2	LSYNVR	4449	Unambiguous	Serine/arginine-rich splicing factor 6 OS=Homo sapiens OX=9606 GN=SRSF6 PE=1 SV=2 - [SRSF6_HUMAN]	1	1	Q13247		HCD	1	0	1	1	0.007	0.105	121	120	1.52	0	23	60	1900000	2	376.209	751.412	0	2.42	27.39	8915	8915	MS2	0/0	0	0	hala.raw
High	A	2	NMSVIAHVDHGK	4445	Unambiguous	Elongation factor 2 OS=Homo sapiens OX=9606 GN=EEF2 PE=1 SV=4 - [EF2_HUMAN]	1	1	P13639		HCD	1	0	1	1	0	1.24e-05	203	193	2.61	0	50	24	11300000	2	654.331	1307.65	0	1.85	27.39	8916	8916	MS2	0/0	0	0	hala.raw
High	A	2	NTDQASMPDNTAAQK	2728	Unambiguous	Myosin-9 OS=Homo sapiens OX=9606 GN=MYH9 PE=1 SV=4 - [MYH9_HUMAN]	2	1	P35579		HCD	1	0	1	1	0	0.00179	32	31	1.97	0	47	60	5260000	2	796.347	1591.69	-0.01	-9.54	27.39	8917	8917	MS2	0/0	0	0	hala.raw
High	A	2	DWHRPcLK	4457	Unambiguous	Cysteine-rich protein 1 OS=Homo sapiens OX=9606 GN=CRIP1 PE=1 SV=3 - [CRIP1_HUMAN]	1	1	P50238	C6(Carbamidomethyl)	HCD	1	0	1	1	0.001	0.0175	140	147	1.6	0	28	45	4730000	3	371.188	1111.55	0	2.03	27.39	8919	8919	MS2	0/0	0	0	hala.raw
High	A	2	HEQNIDcGGGYVK	3439	Unambiguous	Calreticulin OS=Homo sapiens OX=9606 GN=CALR PE=1 SV=1 - [CALR_HUMAN]	1	1	P27797	C7(Carbamidomethyl)	HCD	1	0	1	1	0	5.86e-10	57	63	3.9	0	15	51	13400000	2	738.83	1476.65	0	-0.53	27.41	8925	8925	MS2	0/0	0	0	hala.raw
High	A	2	cMMAQYNR	4465	Unambiguous	Stress-induced-phosphoprotein 1 OS=Homo sapiens OX=9606 GN=STIP1 PE=1 SV=1 - [STIP1_HUMAN]	1	1	P31948	C1(Carbamidomethyl)	HCD	1	0	1	1	0.001	0.0135	14	16	1.94	0	63	22	11400000	2	537.221	1073.43	0	1.12	27.41	8926	8926	MS2	0/0	0	0	hala.raw
High	A	2	AVTEQGHELSNEER	2348	Unambiguous	14-3-3 protein beta/alpha OS=Homo sapiens OX=9606 GN=YWHAB PE=1 SV=3 - [1433B_HUMAN]	1	1	P31946		HCD	1	0	1	1	0	8.75e-09	122	136	3.55	0	16	60	8340000	2	799.874	1598.74	0	-0.41	27.41	8927	8927	MS2	0/0	0	0	hala.raw
High	A	2	QTYSTEPNNLK	3989	Rejected	60S ribosomal protein L28 OS=Homo sapiens OX=9606 GN=RPL28 PE=1 SV=3 - [RL28_HUMAN]	1	1	P46779		HCD	0.0282	0	1	1	0	0.00469	191	211	1.77	0	21	57	11000000	2	647.821	1294.63	0	4.88	27.42	8930	8930	MS2	0/0	0	0	hala.raw
High	A	2	VAPAQPSEEGPGR	2422	Selected	Eukaryotic translation initiation factor 4B OS=Homo sapiens OX=9606 GN=EIF4B PE=1 SV=2 - [IF4B_HUMAN]	1	1	P23588		HCD		0.0282	2	2	0	0.00566	191	211	1.72	0	21	57	11000000	2	647.821	1294.63	0	-3.84	27.42	8930	8930	MS2	0/0	0	0	hala.raw
High	A	2	LTNSMMMHGR	2331	Unambiguous	40S ribosomal protein S5 OS=Homo sapiens OX=9606 GN=RPS5 PE=1 SV=4 - [RS5_HUMAN]	1	1	P46782		HCD	1	0	1	1	0	1e-05	76	75	2.42	0	23	17	14600000	3	393.181	1177.53	0	1.38	27.42	8931	8931	MS2	0/0	0	0	hala.raw
High	A	2	APEQEQAAPGPAAGGEAPK	3410	Unambiguous	Brain acid soluble protein 1 OS=Homo sapiens OX=9606 GN=BASP1 PE=1 SV=2 - [BASP1_HUMAN]	1	1	P80723		HCD	1	0	1	1	0	4.51e-07	195	167	3.06	0	3	60	8980000	2	888.436	1775.86	0	4.76	27.42	8933	8933	MS2	0/0	0	0	hala.raw
High	A	2	TSYEEFTHK	4489	Unambiguous	Pre-mRNA-processing-splicing factor 8 OS=Homo sapiens OX=9606 GN=PRPF8 PE=1 SV=2 - [PRP8_HUMAN]	1	1	Q6P2Q9		HCD	1	0	1	1	0.006	0.0857	81	86	1.31	0	59	60	1460000	3	381.178	1141.52	0	2.04	27.43	8939	8939	MS2	0/0	0	0	hala.raw
High	A	2	YMEENDQLK	4498	Unambiguous	B-cell receptor-associated protein 31 OS=Homo sapiens OX=9606 GN=BCAP31 PE=1 SV=3 - [BAP31_HUMAN]	1	1	P51572		HCD	1	0	1	1	0	0.00767	77	66	1.58	0	40	60	10000000	2	585.261	1169.51	0	0.39	27.44	8944	8944	MS2	0/0	0	0	hala.raw
High	A	2	VLANPGNSQVAR	3999	Unambiguous	Importin subunit beta-1 OS=Homo sapiens OX=9606 GN=KPNB1 PE=1 SV=2 - [IMB1_HUMAN]	1	1	Q14974		HCD	1	0	1	1	0	0.000367	127	124	2.09	0	44	60	6200000	2	613.337	1225.67	0	1.71	27.44	8946	8946	MS2	0/0	0	0	hala.raw
High	A	2	AGFAGDDAPR	3795	Unambiguous	Actin, alpha cardiac muscle 1 OS=Homo sapiens OX=9606 GN=ACTC1 PE=1 SV=1 - [ACTC_HUMAN]|Actin, cytoplasmic 1 OS=Homo sapiens OX=9606 GN=ACTB PE=1 SV=1 - [ACTB_HUMAN]	10	2	P68032;P60709		HCD	1	0	1	1	0	0.000126	78	86	1.74	0	17	2	113000000	2	488.728	976.449	0	0.94	27.45	8948	8948	MS2	0/0	0	0	hala.raw
High	A	2	QAYTQFGGK	4506	Unambiguous	Proteasome subunit alpha type-4 OS=Homo sapiens OX=9606 GN=PSMA4 PE=1 SV=1 - [PSA4_HUMAN]	1	1	P25789		HCD	1	0	1	1	0	0.00719	105	92	1.8	0	52	12	11400000	2	500.249	999.492	0	2.24	27.45	8949	8949	MS2	0/0	0	0	hala.raw
High	A	2	YEAANWK	4508	Unambiguous	Proteasome subunit alpha type-6 OS=Homo sapiens OX=9606 GN=PSMA6 PE=1 SV=1 - [PSA6_HUMAN]	1	1	P60900		HCD	1	0	1	1	0.002	0.0287	101	95	1.43	0	58	14	7680000	2	441.212	881.416	0	0.75	27.45	8950	8950	MS2	0/0	0	0	hala.raw
High	A	2	IIAPPER	4510	Unambiguous	Actin, alpha cardiac muscle 1 OS=Homo sapiens OX=9606 GN=ACTC1 PE=1 SV=1 - [ACTC_HUMAN]|Beta-actin-like protein 2 OS=Homo sapiens OX=9606 GN=ACTBL2 PE=1 SV=2 - [ACTBL_HUMAN]|Actin, cytoplasmic 1 OS=Homo sapiens OX=9606 GN=ACTB PE=1 SV=1 - [ACTB_HUMAN]	7	3	P68032;Q562R1;P60709		HCD	1	0	1	1	0.007	0.108	61	60	1.74	0	16	18	14700000	2	398.24	795.472	0	-0.11	27.45	8951	8951	MS2	0/0	0	0	hala.raw
High	A	2	YESLTDPSK	4512	Unambiguous	Heat shock protein HSP 90-beta OS=Homo sapiens OX=9606 GN=HSP90AB1 PE=1 SV=4 - [HS90B_HUMAN]|Heat shock protein HSP 90-alpha OS=Homo sapiens OX=9606 GN=HSP90AA1 PE=1 SV=5 - [HS90A_HUMAN]|Putative heat shock protein HSP 90-beta 4 OS=Homo sapiens OX=9606 GN=HSP90AB4P PE=5 SV=1 - [H90B4_HUMAN]	5	2	P08238;P07900		HCD	1	0	1	1	0	0.00366	102	108	1.58	0	52	12	10300000	2	520.251	1039.49	0	0.4	27.46	8952	8952	MS2	0/0	0	0	hala.raw
High	A	2	LPEGDLGK	4514	Unambiguous	Eukaryotic translation initiation factor 5A-1 OS=Homo sapiens OX=9606 GN=EIF5A PE=1 SV=2 - [IF5A1_HUMAN]	2	1	P63241		HCD	1	0	1	1	0.001	0.016	83	89	1.51	0	41	32	6740000	2	414.727	828.446	0	0.15	27.46	8953	8953	MS2	0/0	0	0	hala.raw
High	A	2	YYPTEDVPRK	4520	Unambiguous	60S ribosomal protein L6 OS=Homo sapiens OX=9606 GN=RPL6 PE=1 SV=3 - [RL6_HUMAN]	1	1	Q02878		HCD	1	0	1	1	0.008	0.12	170	166	1.65	1	50	60	5170000	2	634.319	1267.63	0	-0.1	27.46	8956	8956	MS2	0/0	0	0	hala.raw
High	A	2	DSYVGDEAQSK	2007	Unambiguous	Actin, alpha cardiac muscle 1 OS=Homo sapiens OX=9606 GN=ACTC1 PE=1 SV=1 - [ACTC_HUMAN]|Actin, cytoplasmic 1 OS=Homo sapiens OX=9606 GN=ACTB PE=1 SV=1 - [ACTB_HUMAN]	6	2	P68032;P60709		HCD	1	0	1	1	0	0.00159	62	58	1.55	0	4	2	131000000	2	599.765	1198.52	0	0.9	27.47	8959	8959	MS2	0/0	0	0	hala.raw
High	A	2	RAEFTVETR	4530	Unambiguous	Filamin-A OS=Homo sapiens OX=9606 GN=FLNA PE=1 SV=4 - [FLNA_HUMAN]	1	1	P21333		HCD	1	0	1	1	0	0.00291	186	180	2.52	1	40	11	15500000	2	554.792	1108.58	0	1.02	27.47	8962	8962	MS2	0/0	0	0	hala.raw
High	A	2	EATTNAPFR	4532	Unambiguous	Leukocyte elastase inhibitor OS=Homo sapiens OX=9606 GN=SERPINB1 PE=1 SV=1 - [ILEU_HUMAN]	1	1	P30740		HCD	1	0	1	1	0	0.00373	193	200	1.58	0	51	15	6350000	2	503.751	1006.5	0	0.07	27.47	8963	8963	MS2	0/0	0	0	hala.raw
High	A	2	DPGVLDR	4536	Unambiguous	Protein S100-A11 OS=Homo sapiens OX=9606 GN=S100A11 PE=1 SV=2 - [S10AB_HUMAN]	1	1	P31949		HCD	1	0	1	1	0.005	0.0713	103	95	2.12	0	9	24	8050000	2	386.204	771.401	0	1.26	27.48	8966	8966	MS2	0/0	0	0	hala.raw
High	A	2	YTcSFcGK	3898	Unambiguous	60S ribosomal protein L37a OS=Homo sapiens OX=9606 GN=RPL37A PE=1 SV=2 - [RL37A_HUMAN]	2	1	P61513	C3(Carbamidomethyl); C6(Carbamidomethyl)	HCD	1	0	1	1	0.003	0.0371	18	9	1.14	0	55	60	5380000	2	511.708	1022.41	0	1.78	27.49	8969	8969	MS2	0/0	0	0	hala.raw
High	A	2	LQDAEIAR	4069	Unambiguous	Protein S100-A6 OS=Homo sapiens OX=9606 GN=S100A6 PE=1 SV=1 - [S10A6_HUMAN]	1	1	P06703		HCD	1	0	1	1	0	0.0101	140	151	1.63	0	16	7	27000000	2	458.249	915.49	0	0.35	27.5	8973	8973	MS2	0/0	0	0	hala.raw
High	A	2	LFQEccPHSTDR	4152	Unambiguous	Heterogeneous nuclear ribonucleoprotein K OS=Homo sapiens OX=9606 GN=HNRNPK PE=1 SV=1 - [HNRPK_HUMAN]	1	1	P61978	C5(Carbamidomethyl); C6(Carbamidomethyl)	HCD	1	0	1	1	0	2.97e-05	32	20	1.95	0	15	60	2770000	2	775.33	1549.65	0	-0.24	27.5	8974	8974	MS2	0/0	0	0	hala.raw
Middle	A	2	SYSDPPLK	4552	Unambiguous	Heterogeneous nuclear ribonucleoprotein F OS=Homo sapiens OX=9606 GN=HNRNPF PE=1 SV=3 - [HNRPF_HUMAN]	1	1	P52597		HCD	1	0	1	1	0.027	0.306	217	231	1.22	0	43	13	8110000	2	453.731	906.455	0	-2.2	27.5	8975	8975	MS2	0/0	0	0	hala.raw
High	A	2	VAVTEGcQPSR	2426	Unambiguous	Filamin-B OS=Homo sapiens OX=9606 GN=FLNB PE=1 SV=2 - [FLNB_HUMAN]	1	1	O75369	C7(Carbamidomethyl)	HCD	1	0	1	1	0.001	0.0168	126	122	1.7	0	69	25	3820000	2	602.294	1203.58	0	2.19	27.5	8978	8978	MS2	0/0	0	0	hala.raw
High	A	2	VEQATKPSFESGR	3297	Unambiguous	RNA-binding motif protein, X chromosome OS=Homo sapiens OX=9606 GN=RBMX PE=1 SV=3 - [RBMX_HUMAN]	1	1	P38159		HCD	1	0	1	1	0	0.000328	189	198	2.46	0	47	60	2290000	2	718.363	1435.72	0	0.46	27.51	8980	8980	MS2	0/0	0	0	hala.raw
High	A	2	MYSYPAR	4568	Unambiguous	Heterogeneous nuclear ribonucleoproteins C1/C2 OS=Homo sapiens OX=9606 GN=HNRNPC PE=1 SV=4 - [HNRPC_HUMAN]	1	1	P07910		HCD	1	0	1	1	0.003	0.0377	65	64	1.46	0	31	6	28200000	2	444.208	887.409	0	0.67	27.51	8983	8983	MS2	0/0	0	0	hala.raw
Middle	A	2	AAPTAASDQPDSAATTEK	2590	Unambiguous	Partner of Y14 and mago OS=Homo sapiens OX=9606 GN=PYM1 PE=1 SV=1 - [PYM1_HUMAN]	1	1	Q9BRP8		HCD	1	0	1	1	0.014	0.191	115	101	0.91	0	29	60	864000	2	866.405	1731.8	0	-0.69	27.52	8985	8985	MS2	0/0	0	0	hala.raw
High	A	2	cILQDGR	4576	Unambiguous	Small nuclear ribonucleoprotein-associated proteins B and B' OS=Homo sapiens OX=9606 GN=SNRPB PE=1 SV=2 - [RSMB_HUMAN]	2	1	P14678	C1(Carbamidomethyl)	HCD	1	0	1	1	0.006	0.0811	204	195	1.46	0	48	10	12900000	2	431.216	861.426	0	0.89	27.52	8987	8987	MS2	0/0	0	0	hala.raw
High	A	2	ALEENNNFSK	3443	Unambiguous	Stathmin OS=Homo sapiens OX=9606 GN=STMN1 PE=1 SV=3 - [STMN1_HUMAN]	2	1	P16949		HCD	1	0	1	1	0	0.000818	121	133	1.78	0	47	36	6940000	2	583.278	1165.55	0	-0.57	27.52	8988	8988	MS2	0/0	0	0	hala.raw
High	A	2	AIEENNNFSK	3443	Unambiguous	Stathmin OS=Homo sapiens OX=9606 GN=STMN1 PE=1 SV=3 - [STMN1_HUMAN]	2	1	P16949		HCD	1	0	1	2	0	0.000818	121	133	1.78	0	47	36	6940000	2	583.278	1165.55	0	-0.57	27.52	8988	8988	MS2	0/0	0	0	hala.raw
High	A	2	NYQQNYQNSESGEK	2027	Unambiguous	Nuclease-sensitive element-binding protein 1 OS=Homo sapiens OX=9606 GN=YBX1 PE=1 SV=3 - [YBOX1_HUMAN]	1	1	P67809		HCD	1	0	1	1	0	1.56e-05	26	35	2.17	0	5	60	2360000	2	844.86	1688.71	0	-1.27	27.53	8993	8993	MS2	0/0	0	0	hala.raw
High	A	2	ETMQSLNDR	1322	Unambiguous	Keratin, type I cytoskeletal 18 OS=Homo sapiens OX=9606 GN=KRT18 PE=1 SV=2 - [K1C18_HUMAN]	2	1	P05783		HCD	1	0	1	1	0	0.00252	77	64	1.79	0	20	8	20700000	2	547.25	1093.49	0	-1.89	27.54	8998	8998	MS2	0/0	0	0	hala.raw
High	A	2	HYYEVScHDQGLcR	4600	Unambiguous	ATP-dependent RNA helicase DDX1 OS=Homo sapiens OX=9606 GN=DDX1 PE=1 SV=2 - [DDX1_HUMAN]	1	1	Q92499	C7(Carbamidomethyl); C13(Carbamidomethyl)	HCD	1	0	1	1	0.007	0.0992	22	25	1.02	0	19	60	1160000	2	912.382	1823.76	0	-1.21	27.55	9000	9000	MS2	0/0	0	0	hala.raw
High	A	2	AVTEQGHELSNEER	2348	Unambiguous	14-3-3 protein beta/alpha OS=Homo sapiens OX=9606 GN=YWHAB PE=1 SV=3 - [1433B_HUMAN]	1	1	P31946		HCD	1	0	1	1	0	0.000153	124	134	1.62	0	72	8	13600000	3	533.586	1598.74	0	1.34	27.55	9001	9001	MS2	0/0	0	0	hala.raw
High	A	2	EAMEDGEIDGNK	4013	Unambiguous	Nucleolin OS=Homo sapiens OX=9606 GN=NCL PE=1 SV=3 - [NUCL_HUMAN]	1	1	P19338		HCD	1	0	1	1	0	3.21e-05	29	29	2.45	0	54	28	9070000	2	654.275	1307.54	0	0.26	27.55	9002	9002	MS2	0/0	0	0	hala.raw
High	A	2	IFAQDGEGQR	3670	Unambiguous	Filamin-B OS=Homo sapiens OX=9606 GN=FLNB PE=1 SV=2 - [FLNB_HUMAN]	1	1	O75369		HCD	1	0	1	1	0	0.00172	160	150	1.76	0	55	34	5250000	2	560.774	1120.54	0	1.99	27.56	9007	9007	MS2	0/0	0	0	hala.raw
High	A	2	ENQQATSGPNQPSVR	2078	Unambiguous	Y-box-binding protein 3 OS=Homo sapiens OX=9606 GN=YBX3 PE=1 SV=4 - [YBOX3_HUMAN]	1	1	P16989		HCD	1	0	1	1	0	0.00131	165	164	2.07	0	0	60	1230000	2	806.891	1612.77	0	4.2	27.56	9008	9008	MS2	0/0	0	0	hala.raw
High	A	2	YRPGTVALR	4616	Unambiguous	Histone H3.1 OS=Homo sapiens OX=9606 GN=HIST1H3A PE=1 SV=2 - [H31_HUMAN]	5	1	P68431		HCD	1	0	1	1	0.001	0.0127	167	173	1.57	0	50	5	29300000	2	516.802	1032.6	0	1.27	27.57	9010	9010	MS2	0/0	0	0	hala.raw
High	A	2	MDSTEPPYSQK	3613	Unambiguous	Elongation factor 1-alpha 1 OS=Homo sapiens OX=9606 GN=EEF1A1 PE=1 SV=1 - [EF1A1_HUMAN]	2	1	P68104		HCD	1	0	1	1	0	0.000339	68	55	1.79	0	23	55	9820000	2	641.784	1282.56	0	-0.27	27.57	9011	9011	MS2	0/0	0	0	hala.raw
High	A	2	YLAEVAcGDDRK	4620	Unambiguous	14-3-3 protein theta OS=Homo sapiens OX=9606 GN=YWHAQ PE=1 SV=1 - [1433T_HUMAN]	1	1	P27348	C7(Carbamidomethyl)	HCD	1	0	1	1	0	0.00625	124	125	2.08	1	50	13	10200000	3	466.222	1396.65	0	-0.34	27.58	9013	9013	MS2	0/0	0	0	hala.raw
High	A	2	QLETLGQEK	4627	Unambiguous	Keratin, type II cytoskeletal 8 OS=Homo sapiens OX=9606 GN=KRT8 PE=1 SV=7 - [K2C8_HUMAN]	1	1	P05787		HCD	1	0	1	1	0	0.00404	212	196	1.91	0	38	8	32400000	2	523.28	1045.55	0	-0.16	27.58	9016	9016	MS2	0/0	0	0	hala.raw
High	A	2	IVYPTEK	4631	Unambiguous	LIM and SH3 domain protein 1 OS=Homo sapiens OX=9606 GN=LASP1 PE=1 SV=2 - [LASP1_HUMAN]	1	1	Q14847		HCD	1	0	1	1	0.006	0.0885	132	133	1.46	0	37	17	6860000	2	425.24	849.472	0	0.86	27.58	9018	9018	MS2	0/0	0	0	hala.raw
High	A	2	APKPDGPGGGPGGSHMGGNYGDDR	1814	Unambiguous	RNA-binding protein FUS OS=Homo sapiens OX=9606 GN=FUS PE=1 SV=1 - [FUS_HUMAN]	1	1	P35637		HCD	1	0	1	1	0	3.4e-05	20	26	2.58	0	23	60	6530000	4	563.999	2252.97	0	-0.06	27.59	9020	9020	MS2	0/0	0	0	hala.raw
High	A	2	SNVSDAVAQSTR	4643	Unambiguous	Triosephosphate isomerase OS=Homo sapiens OX=9606 GN=TPI1 PE=1 SV=3 - [TPIS_HUMAN]	1	1	P60174		HCD	1	0	1	1	0	6.43e-06	164	172	2.48	0	17	6	51900000	2	617.805	1234.6	0	-0.34	27.6	9025	9025	MS2	0/0	0	0	hala.raw
High	A	2	IIEDQQESLNK	4649	Unambiguous	Lupus La protein OS=Homo sapiens OX=9606 GN=SSB PE=1 SV=2 - [LA_HUMAN]	1	1	P05455		HCD	1	0	1	1	0	8.71e-05	224	207	1.99	0	12	21	14900000	2	658.839	1316.67	0	0.89	27.61	9029	9029	MS2	0/0	0	0	hala.raw
High	A	2	YIcENQDSISSK	4654	Unambiguous	Serum albumin OS=Homo sapiens OX=9606 GN=ALB PE=1 SV=2 - [ALBU_HUMAN]	1	1	P02768	C3(Carbamidomethyl)	HCD	1	0	1	2	0.007	0.0991	69	70	1	0	40	60	6270000	2	722.325	1443.64	0	0.63	27.61	9031	9031	MS2	0/0	0	0	hala.raw
High	A	2	TDEGIAYR	3791	Unambiguous	Peroxiredoxin-2 OS=Homo sapiens OX=9606 GN=PRDX2 PE=1 SV=5 - [PRDX2_HUMAN]	1	1	P32119		HCD	1	0	1	1	0	0.00514	88	91	1.58	0	65	9	8800000	2	462.725	924.443	0	0.87	27.61	9032	9032	MS2	0/0	0	0	hala.raw
High	A	2	LAVDEEENADNNTK	3902	Unambiguous	Transferrin receptor protein 1 OS=Homo sapiens OX=9606 GN=TFRC PE=1 SV=2 - [TFR1_HUMAN]	1	1	P02786		HCD	1	0	1	1	0	6.09e-05	74	60	2.13	0	55	60	4200000	2	781.356	1561.7	0	3.89	27.61	9034	9034	MS2	0/0	0	0	hala.raw
High	A	2	VTLPDGK	4661	Unambiguous	Threonine--tRNA ligase, cytoplasmic OS=Homo sapiens OX=9606 GN=TARS PE=1 SV=3 - [SYTC_HUMAN]	1	1	P26639		HCD	1	0	1	1	0.007	0.102	87	96	1.45	0	18	60	2590000	2	365.211	729.416	0	1.84	27.61	9035	9035	MS2	0/0	0	0	hala.raw
High	A	2	YSGSEGSTQTLTK	2811	Unambiguous	Protein S100-P OS=Homo sapiens OX=9606 GN=S100P PE=1 SV=2 - [S100P_HUMAN]	1	1	P25815		HCD	1	0	1	1	0	1.26e-05	121	123	2.18	0	45	57	10100000	2	679.826	1358.64	0	0.2	27.62	9036	9036	MS2	0/0	0	0	hala.raw
Middle	A	2	VDcTAHSDVcSAQGVR	2934	Unambiguous	Thioredoxin domain-containing protein 5 OS=Homo sapiens OX=9606 GN=TXNDC5 PE=1 SV=2 - [TXND5_HUMAN]	1	1	Q8NBS9	C3(Carbamidomethyl); C10(Carbamidomethyl)	HCD	1	0	1	1	0.027	0.313	42	39	1.08	0	35	60	1630000	2	881.386	1761.77	0	0.74	27.62	9038	9038	MS2	0/0	0	0	hala.raw
High	A	2	NHEEEMNALR	1245	Unambiguous	Keratin, type I cytoskeletal 17 OS=Homo sapiens OX=9606 GN=KRT17 PE=1 SV=2 - [K1C17_HUMAN]	2	1	Q04695		HCD	1	0	1	1	0	0.000773	45	34	2.24	0	14	19	17700000	2	621.779	1242.55	0	-1.34	27.63	9040	9040	MS2	0/0	0	0	hala.raw
High	A	2	DMEESIR	4676	Unambiguous	Glucosidase 2 subunit beta OS=Homo sapiens OX=9606 GN=PRKCSH PE=1 SV=2 - [GLU2B_HUMAN]	1	1	P14314		HCD	1	0	1	1	0.007	0.0977	72	75	1.3	0	63	12	8420000	2	440.197	879.388	0	-0.24	27.63	9043	9043	MS2	0/0	0	0	hala.raw
Middle	A	2	FSVPSGSSPGSQSDAEPR	4683	Unambiguous	Centrosomal protein of 192 kDa OS=Homo sapiens OX=9606 GN=CEP192 PE=1 SV=3 - [CE192_HUMAN]	1	1	Q8TEP8		HCD	1	0	1	1	0.021	0.251	99	134	0.91	0	36	60	1330000	2	896.415	1791.82	0	4.37	27.64	9047	9047	MS2	0/0	0	0	hala.raw
High	A	2	NQGGYGGSSSSSSYGSGR	1600	Unambiguous	Heterogeneous nuclear ribonucleoprotein A1 OS=Homo sapiens OX=9606 GN=HNRNPA1 PE=1 SV=5 - [ROA1_HUMAN]	1	1	P09651		HCD	1	0	1	1	0	3.99e-11	14	12	3.78	0	16	60	5330000	2	847.853	1694.7	0	-0.3	27.65	9051	9051	MS2	0/0	0	0	hala.raw
High	A	2	HQGVMVGMGQK	4226	Unambiguous	Actin, alpha cardiac muscle 1 OS=Homo sapiens OX=9606 GN=ACTC1 PE=1 SV=1 - [ACTC_HUMAN]|Beta-actin-like protein 2 OS=Homo sapiens OX=9606 GN=ACTBL2 PE=1 SV=2 - [ACTBL_HUMAN]|Actin, cytoplasmic 1 OS=Homo sapiens OX=9606 GN=ACTB PE=1 SV=1 - [ACTB_HUMAN]	7	3	P68032;Q562R1;P60709		HCD	1	0	1	1	0	0.00101	129	127	1.96	0	73	60	1960000	2	586.289	1171.57	0	-0.45	27.65	9052	9052	MS2	0/0	0	0	hala.raw
High	A	2	DAIAQAVR	4693	Unambiguous	Transketolase OS=Homo sapiens OX=9606 GN=TKT PE=1 SV=3 - [TKT_HUMAN]	1	1	P29401		HCD	1	0	1	1	0.001	0.0124	174	182	2.19	0	7	9	31300000	2	422.238	843.468	0	-0.54	27.65	9054	9054	MS2	0/0	0	0	hala.raw
High	A	2	GSGTAEVELK	4695	Unambiguous	Pyruvate kinase PKM OS=Homo sapiens OX=9606 GN=PKM PE=1 SV=4 - [KPYM_HUMAN]	1	1	P14618		HCD	1	0	1	1	0	0.00249	251	240	1.67	0	33	7	25000000	2	495.759	990.51	0	-0.52	27.66	9055	9055	MS2	0/0	0	0	hala.raw
High	A	2	GIPHLVTHDAR	4697	Unambiguous	40S ribosomal protein S4, X isoform OS=Homo sapiens OX=9606 GN=RPS4X PE=1 SV=2 - [RS4X_HUMAN]	3	1	P62701		HCD	1	0	1	1	0	0.00275	255	270	2.05	0	35	15	11900000	3	405.891	1215.66	0	-1.35	27.66	9056	9056	MS2	0/0	0	0	hala.raw
High	A	2	AVTEQGAELSNEER	4699	Unambiguous	14-3-3 protein theta OS=Homo sapiens OX=9606 GN=YWHAQ PE=1 SV=1 - [1433T_HUMAN]	1	1	P27348		HCD	1	0	1	1	0	1.12e-07	132	137	2.94	0	21	60	5180000	2	766.862	1532.72	0	-0.71	27.66	9057	9057	MS2	0/0	0	0	hala.raw
High	A	2	ETAENYLGHTAK	4701	Unambiguous	Stress-70 protein, mitochondrial OS=Homo sapiens OX=9606 GN=HSPA9 PE=1 SV=2 - [GRP75_HUMAN]	1	1	P38646		HCD	1	0	1	1	0	2.49e-05	151	152	2.58	0	24	18	14900000	2	667.322	1333.64	0	-1.34	27.66	9058	9058	MS2	0/0	0	0	hala.raw
High	A	2	ISSSSFSR	3579	Unambiguous	Keratin, type II cytoskeletal 8 OS=Homo sapiens OX=9606 GN=KRT8 PE=1 SV=7 - [K2C8_HUMAN]	1	1	P05787		HCD	1	0	1	1	0	0.00474	106	116	1.63	0	38	9	17800000	2	435.72	870.433	0	1.71	27.67	9063	9063	MS2	0/0	0	0	hala.raw
High	A	2	HELQANcYEEVK	4712	Unambiguous	Cofilin-1 OS=Homo sapiens OX=9606 GN=CFL1 PE=1 SV=3 - [COF1_HUMAN]	1	1	P23528	C7(Carbamidomethyl)	HCD	1	0	1	1	0	1.32e-07	70	59	3.27	0	47	60	7880000	2	760.347	1519.69	0	1.13	27.67	9064	9064	MS2	0/0	0	0	hala.raw
High	A	2	EVYQQQQYGSGGR	3402	Unambiguous	Heterogeneous nuclear ribonucleoprotein A/B OS=Homo sapiens OX=9606 GN=HNRNPAB PE=1 SV=2 - [ROAA_HUMAN]	1	1	Q99729		HCD	1	0	1	1	0	3.26e-06	90	93	1.94	0	22	60	3650000	2	750.347	1499.69	0	-0.46	27.68	9068	9068	MS2	0/0	0	0	hala.raw
High	A	2	LQSIGTENTEENR	4724	Unambiguous	Fructose-bisphosphate aldolase A OS=Homo sapiens OX=9606 GN=ALDOA PE=1 SV=2 - [ALDOA_HUMAN]	1	1	P04075		HCD	1	0	1	1	0	6.61e-07	142	130	2.79	0	45	18	14700000	2	745.857	1490.71	0	-0.67	27.69	9072	9072	MS2	0/0	0	0	hala.raw
High	A	2	GVEEEEEDGEMRE	4730	Unambiguous	Small nuclear ribonucleoprotein F OS=Homo sapiens OX=9606 GN=SNRPF PE=1 SV=1 - [RUXF_HUMAN]	1	1	P62306		HCD	1	0	1	1	0	0.00414	6	5	1.68	1	38	60	2760000	2	769.3	1537.59	0	-2.29	27.7	9075	9075	MS2	0/0	0	0	hala.raw
High	A	2	ETPAATEAPSSTPK	2813	Unambiguous	Brain acid soluble protein 1 OS=Homo sapiens OX=9606 GN=BASP1 PE=1 SV=2 - [BASP1_HUMAN]	1	1	P80723		HCD	1	0	1	1	0	1.9e-05	145	143	2.8	0	27	60	18800000	2	693.841	1386.67	0	0.14	27.7	9077	9077	MS2	0/0	0	0	hala.raw
High	A	2	QDVDNASLAR	3220	Unambiguous	Vimentin OS=Homo sapiens OX=9606 GN=VIM PE=1 SV=4 - [VIME_HUMAN]	1	1	P08670		HCD	1	0	1	1	0	0.000149	124	128	2.1	0	40	6	24000000	2	544.77	1088.53	0	-0.11	27.71	9083	9083	MS2	0/0	0	0	hala.raw
High	A	2	AFHNEAQVNPER	3065	Unambiguous	T-complex protein 1 subunit alpha OS=Homo sapiens OX=9606 GN=TCP1 PE=1 SV=1 - [TCPA_HUMAN]	1	1	P17987		HCD	1	0	1	1	0	0.000972	126	124	2.29	0	16	17	11200000	3	471.229	1411.67	0	0.45	27.72	9084	9084	MS2	0/0	0	0	hala.raw
High	A	2	NSSTYWEGK	4746	Unambiguous	Threonine--tRNA ligase, cytoplasmic OS=Homo sapiens OX=9606 GN=TARS PE=1 SV=3 - [SYTC_HUMAN]	1	1	P26639		HCD	1	0	1	1	0.001	0.0224	53	52	1.18	0	75	34	5250000	2	536.241	1071.47	0	0.66	27.72	9085	9085	MS2	0/0	0	0	hala.raw
High	A	2	HELQANcYEEVK	4712	Unambiguous	Cofilin-1 OS=Homo sapiens OX=9606 GN=CFL1 PE=1 SV=3 - [COF1_HUMAN]	1	1	P23528	C7(Carbamidomethyl)	HCD	1	0	1	1	0.003	0.0473	73	60	1.79	0	55	12	16400000	3	507.234	1519.69	0	1.94	27.72	9086	9086	MS2	0/0	0	0	hala.raw
High	A	2	LQAVTDDHIR	4750	Unambiguous	Flavin reductase (NADPH) OS=Homo sapiens OX=9606 GN=BLVRB PE=1 SV=3 - [BLVRB_HUMAN]	1	1	P30043		HCD	1	0	1	1	0	0.00258	179	192	2.04	0	44	60	8190000	2	584.309	1167.61	0	-0.91	27.72	9087	9087	MS2	0/0	0	0	hala.raw
High	A	2	LHNELQSGSLR	4752	Unambiguous	RRP12-like protein OS=Homo sapiens OX=9606 GN=RRP12 PE=1 SV=2 - [RRP12_HUMAN]	1	1	Q5JTH9		HCD	1	0	1	1	0.002	0.0288	180	172	1.99	0	34	60	2810000	3	418.556	1253.65	0	-4.49	27.72	9088	9088	MS2	0/0	0	0	hala.raw
High	A	2	ESEPQAAAEPAEAK	2735	Unambiguous	Brain acid soluble protein 1 OS=Homo sapiens OX=9606 GN=BASP1 PE=1 SV=2 - [BASP1_HUMAN]	1	1	P80723		HCD	1	0	1	1	0	7.68e-05	93	102	2.36	0	7	47	17300000	2	714.336	1427.66	0	-0.77	27.73	9090	9090	MS2	0/0	0	0	hala.raw
High	A	2	GPAYGLSR	4309	Unambiguous	Transgelin-2 OS=Homo sapiens OX=9606 GN=TAGLN2 PE=1 SV=3 - [TAGL2_HUMAN]	1	1	P37802		HCD	1	0	1	1	0.006	0.08	229	225	1.36	0	50	20	4900000	2	410.719	820.431	0	0.28	27.73	9091	9091	MS2	0/0	0	0	hala.raw
High	A	2	YLAEVAcGDDRK	4620	Unambiguous	14-3-3 protein theta OS=Homo sapiens OX=9606 GN=YWHAQ PE=1 SV=1 - [1433T_HUMAN]	1	1	P27348	C7(Carbamidomethyl)	HCD	1	0	1	1	0	5.1e-05	121	129	2.46	1	21	60	8750000	2	698.83	1396.65	0	0.55	27.73	9093	9093	MS2	0/0	0	0	hala.raw
Middle	A	2	TNYNDRYDEIR	4760	Unambiguous	60S ribosomal protein L7a OS=Homo sapiens OX=9606 GN=RPL7A PE=1 SV=2 - [RL7A_HUMAN]	1	1	P62424		HCD	1	0	1	1	0.032	0.355	92	77	1.48	1	73	60	1670000	2	729.834	1458.66	0	-0.26	27.74	9094	9094	MS2	0/0	0	0	hala.raw
High	A	2	NIIHGSDSVESAEK	4256	Unambiguous	Nucleoside diphosphate kinase A OS=Homo sapiens OX=9606 GN=NME1 PE=1 SV=1 - [NDKA_HUMAN]	1	1	P15531		HCD	1	0	1	1	0	0.000177	136	146	2.19	0	41	60	6870000	2	743.364	1485.72	0	2.15	27.74	9097	9097	MS2	0/0	0	0	hala.raw
High	A	2	VLTGVAGEDAEcHAAK	4766	Unambiguous	Importin-7 OS=Homo sapiens OX=9606 GN=IPO7 PE=1 SV=1 - [IPO7_HUMAN]	1	1	O95373	C12(Carbamidomethyl)	HCD	1	0	1	1	0	1.69e-05	134	145	2.51	0	25	60	2480000	2	814.39	1627.77	0	-1.32	27.75	9098	9098	MS2	0/0	0	0	hala.raw
High	A	2	EASDPQPEEADGGLK	4768	Unambiguous	F-actin-capping protein subunit alpha-1 OS=Homo sapiens OX=9606 GN=CAPZA1 PE=1 SV=3 - [CAZA1_HUMAN]	1	1	P52907		HCD	1	0	1	1	0	0.000665	75	77	1.97	0	52	60	2510000	2	771.851	1542.69	0	1.84	27.75	9099	9099	MS2	0/0	0	0	hala.raw
Middle	A	2	IQEAGTEVVK	4041	Unambiguous	Malate dehydrogenase, mitochondrial OS=Homo sapiens OX=9606 GN=MDH2 PE=1 SV=3 - [MDHM_HUMAN]	1	1	P40926		HCD	1	0	1	1	0.022	0.262	234	243	1.36	0	77	34	4340000	2	537.296	1073.58	0	0.36	27.75	9101	9101	MS2	0/0	0	0	hala.raw
High	A	2	EATNPPVIQEEKPK	4776	Unambiguous	Protein disulfide-isomerase A3 OS=Homo sapiens OX=9606 GN=PDIA3 PE=1 SV=4 - [PDIA3_HUMAN]	1	1	P30101		HCD	1	0	1	1	0	0.00238	227	220	1.64	0	47	60	2880000	2	790.419	1579.83	0	-1.55	27.76	9104	9104	MS2	0/0	0	0	hala.raw
High	A	2	YTQSNSVcYAK	2817	Unambiguous	Bifunctional purine biosynthesis protein PURH OS=Homo sapiens OX=9606 GN=ATIC PE=1 SV=3 - [PUR9_HUMAN]	1	1	P31939	C8(Carbamidomethyl)	HCD	1	0	1	1	0	0.00908	61	60	1.58	0	25	60	2790000	2	660.798	1320.59	0	0.2	27.76	9105	9105	MS2	0/0	0	0	hala.raw
High	A	2	GIPHLVTHDAR	4697	Unambiguous	40S ribosomal protein S4, X isoform OS=Homo sapiens OX=9606 GN=RPS4X PE=1 SV=2 - [RS4X_HUMAN]	3	1	P62701		HCD	1	0	1	1	0	0.00361	267	278	1.51	0	71	31	6740000	2	608.333	1215.66	0	-0.49	27.76	9106	9106	MS2	0/0	0	0	hala.raw
High	A	2	LIQNLDANHDGR	4786	Unambiguous	Protein S100-A16 OS=Homo sapiens OX=9606 GN=S100A16 PE=1 SV=1 - [S10AG_HUMAN]	1	1	Q96FQ6		HCD	1	0	1	1	0	2e-05	209	222	2.95	0	23	34	7880000	3	455.901	1365.69	0	1.72	27.77	9111	9111	MS2	0/0	0	0	hala.raw
High	A	2	HVGDLGNVTADK	4788	Unambiguous	Superoxide dismutase [Cu-Zn] OS=Homo sapiens OX=9606 GN=SOD1 PE=1 SV=2 - [SODC_HUMAN]	1	1	P00441		HCD	1	0	1	1	0	0.000628	161	165	2.31	0	49	60	5840000	2	613.312	1225.62	0	0.13	27.77	9112	9112	MS2	0/0	0	0	hala.raw
High	A	2	SEENEEPMETDQNAK	2895	Unambiguous	Heat shock 70 kDa protein 4 OS=Homo sapiens OX=9606 GN=HSPA4 PE=1 SV=4 - [HSP74_HUMAN]	1	1	P34932		HCD	1	0	1	1	0.002	0.0321	17	16	1.05	0	38	60	691000	2	875.858	1750.71	0	0.57	27.79	9118	9118	MS2	0/0	0	0	hala.raw
High	A	2	AQYEDIANR	4800	Unambiguous	Keratin, type II cytoskeletal 8 OS=Homo sapiens OX=9606 GN=KRT8 PE=1 SV=7 - [K2C8_HUMAN]	2	1	P05787		HCD	1	0	1	1	0	0.00198	128	115	1.65	0	35	4	41100000	2	540.259	1079.51	0	-0.8	27.79	9120	9120	MS2	0/0	0	0	hala.raw
High	A	2	DYDDMSPR	4807	Unambiguous	Heterogeneous nuclear ribonucleoprotein K OS=Homo sapiens OX=9606 GN=HNRNPK PE=1 SV=1 - [HNRPK_HUMAN]	1	1	P61978		HCD	1	0	1	1	0.001	0.0185	13	10	1.5	0	55	7	15000000	2	499.698	998.388	0	-0.08	27.8	9123	9123	MS2	0/0	0	0	hala.raw
High	A	2	ETPAATEAPSSTPK	2813	Unambiguous	Brain acid soluble protein 1 OS=Homo sapiens OX=9606 GN=BASP1 PE=1 SV=2 - [BASP1_HUMAN]	1	1	P80723		HCD	1	0	1	1	0	2.2e-06	146	144	2.34	0	9	20	16200000	2	693.841	1386.67	0	0.05	27.81	9126	9126	MS2	0/0	0	0	hala.raw
High	A	2	LSQETEALGR	4813	Unambiguous	Nucleobindin-1 OS=Homo sapiens OX=9606 GN=NUCB1 PE=1 SV=4 - [NUCB1_HUMAN]	1	1	Q02818		HCD	1	0	1	1	0	0.00632	209	217	2.02	0	37	60	3720000	2	552.284	1103.56	0	-8.11	27.81	9127	9127	MS2	0/0	0	0	hala.raw
High	A	2	VTLTSEEEAR	4815	Unambiguous	L-lactate dehydrogenase A chain OS=Homo sapiens OX=9606 GN=LDHA PE=1 SV=2 - [LDHA_HUMAN]	1	1	P00338		HCD	1	0	1	1	0	3.44e-05	215	202	2.16	0	9	2	130000000	2	567.785	1134.56	0	-0.53	27.81	9129	9129	MS2	0/0	0	0	hala.raw
High	A	2	HYGGLTGLNK	4817	Unambiguous	Phosphoglycerate mutase 1 OS=Homo sapiens OX=9606 GN=PGAM1 PE=1 SV=2 - [PGAM1_HUMAN]	3	1	P18669		HCD	1	0	1	1	0	0.00408	166	187	2.19	0	34	5	39800000	2	530.282	1059.56	0	-1.08	27.82	9130	9130	MS2	0/0	0	0	hala.raw
High	A	2	VSGAQEMVSSAK	4827	Unambiguous	Perilipin-3 OS=Homo sapiens OX=9606 GN=PLIN3 PE=1 SV=3 - [PLIN3_HUMAN]	1	1	O60664		HCD	1	0	1	1	0	3.63e-05	169	161	2.37	0	63	60	5830000	2	597.294	1193.58	0	-2.62	27.83	9137	9137	MS2	0/0	0	0	hala.raw
Middle	A	2	EVSTYIK	150	Unambiguous	Elongation factor 1-alpha 1 OS=Homo sapiens OX=9606 GN=EEF1A1 PE=1 SV=1 - [EF1A1_HUMAN]	2	1	P68104		HCD	1	0	1	1	0.031	0.343	114	130	1.35	0	14	17	15100000	2	420.229	839.45	0	-0.82	27.83	9138	9138	MS2	0/0	0	0	hala.raw
High	A	2	LTIAEER	4831	Selected	40S ribosomal protein S4, X isoform OS=Homo sapiens OX=9606 GN=RPS4X PE=1 SV=2 - [RS4X_HUMAN]	2	1	P62701		HCD	0.016	0	1	1	0.001	0.0185	258	262	1.87	0	26	13	15100000	2	416.232	831.456	0	-0.83	27.84	9139	9139	MS2	0/0	0	0	hala.raw
Middle	A	2	LTALEER	4832	Rejected	Spectrin beta chain, non-erythrocytic 2 OS=Homo sapiens OX=9606 GN=SPTBN2 PE=1 SV=3 - [SPTN2_HUMAN]	1	0			HCD		0.016	2	2	0.01	0.146	258	262	1.84	0	26	13	15100000	2	416.232	831.456	0	-0.83	27.84	9139	9139	MS2	0/0	0	0	hala.raw
Middle	A	2	IYHPNIDEK	4834	Unambiguous	Ubiquitin-conjugating enzyme E2 L3 OS=Homo sapiens OX=9606 GN=UBE2L3 PE=1 SV=1 - [UB2L3_HUMAN]	2	1	P68036		HCD	1	0	1	2	0.013	0.185	166	151	1.16	0	49	60	1850000	3	376.862	1128.57	0	1.37	27.84	9140	9140	MS2	0/0	0	0	hala.raw
High	A	2	AQEPLVDGcSGGGR	4843	Unambiguous	Endoplasmic reticulum metallopeptidase 1 OS=Homo sapiens OX=9606 GN=ERMP1 PE=1 SV=2 - [ERMP1_HUMAN]	1	1	Q7Z2K6	C9(Carbamidomethyl)	HCD	1	0	1	1	0	0.0071	95	111	1.64	0	61	60	6840000	2	701.829	1402.65	0.01	8.93	27.85	9146	9146	MS2	0/0	0	0	hala.raw
High	A	2	VDNSSLTGESEPQTR	4415	Unambiguous	Sodium/potassium-transporting ATPase subunit alpha-1 OS=Homo sapiens OX=9606 GN=ATP1A1 PE=1 SV=1 - [AT1A1_HUMAN]|Potassium-transporting ATPase alpha chain 1 OS=Homo sapiens OX=9606 GN=ATP4A PE=2 SV=5 - [ATP4A_HUMAN]	4	2	P05023;P20648		HCD	1	0	1	1	0.001	0.0127	110	118	1.46	0	70	60	773000	2	810.38	1619.75	0	1.57	27.86	9149	9149	MS2	0/0	0	0	hala.raw
High	A	2	VLATVTKPVGGDK	4822	Unambiguous	60S ribosomal protein L6 OS=Homo sapiens OX=9606 GN=RPL6 PE=1 SV=3 - [RL6_HUMAN]	1	1	Q02878		HCD	1	0	1	1	0	0.000985	111	110	2.07	0	56	59	9010000	2	642.879	1284.75	0	-1.43	27.86	9151	9151	MS2	0/0	0	0	hala.raw
High	A	2	EIAQDFK	4854	Unambiguous	Histone H3.1 OS=Homo sapiens OX=9606 GN=HIST1H3A PE=1 SV=2 - [H31_HUMAN]	4	1	P68431		HCD	1	0	1	1	0.006	0.0886	131	161	1.57	0	47	41	6320000	2	425.719	850.43	0	-0.24	27.86	9152	9152	MS2	0/0	0	0	hala.raw
High	A	2	IEYNDQNDGScDVK	3599	Unambiguous	Filamin-B OS=Homo sapiens OX=9606 GN=FLNB PE=1 SV=2 - [FLNB_HUMAN]	1	1	O75369	C11(Carbamidomethyl)	HCD	1	0	1	1	0.005	0.072	16	24	1.09	0	62	60	1390000	2	828.843	1656.68	0	-1	27.87	9154	9154	MS2	0/0	0	0	hala.raw
High	A	2	EVATNSELVQSGK	4862	Unambiguous	Keratin, type I cytoskeletal 17 OS=Homo sapiens OX=9606 GN=KRT17 PE=1 SV=2 - [K1C17_HUMAN]	2	1	Q04695		HCD	1	0	1	1	0	8.47e-05	229	222	2.14	0	34	60	7210000	2	681.351	1361.69	0	2.75	27.87	9158	9158	MS2	0/0	0	0	hala.raw
High	A	2	LQAVTDDHIR	4750	Unambiguous	Flavin reductase (NADPH) OS=Homo sapiens OX=9606 GN=BLVRB PE=1 SV=3 - [BLVRB_HUMAN]	1	1	P30043		HCD	1	0	1	1	0	0.000365	181	192	1.97	0	20	54	3570000	3	389.875	1167.61	0	-0.46	27.88	9160	9160	MS2	0/0	0	0	hala.raw
High	A	2	LIQNLDANHDGR	4786	Unambiguous	Protein S100-A16 OS=Homo sapiens OX=9606 GN=S100A16 PE=1 SV=1 - [S10AG_HUMAN]	1	1	Q96FQ6		HCD	1	0	1	1	0	1.21e-05	192	207	2.5	0	34	60	6030000	2	683.347	1365.69	0	-0.41	27.88	9161	9161	MS2	0/0	0	0	hala.raw
High	A	2	ESFDGSVR	3733	Unambiguous	Nucleolin OS=Homo sapiens OX=9606 GN=NCL PE=1 SV=3 - [NUCL_HUMAN]	1	1	P19338		HCD	1	0	1	1	0.002	0.033	80	81	1.54	0	35	53	5900000	2	448.709	896.411	0	-0.35	27.89	9163	9163	MS2	0/0	0	0	hala.raw
High	A	2	HSLNSSSASTTEPDFQK	4872	Unambiguous	Leucine-rich PPR motif-containing protein, mitochondrial OS=Homo sapiens OX=9606 GN=LRPPRC PE=1 SV=3 - [LPPRC_HUMAN]	1	1	P42704		HCD	1	0	1	1	0.007	0.106	136	141	1.32	0	23	60	1240000	2	918.428	1835.85	0	4.7	27.89	9164	9164	MS2	0/0	0	0	hala.raw
High	A	2	EGALcEENMR	4883	Unambiguous	Elongation factor 2 OS=Homo sapiens OX=9606 GN=EEF2 PE=1 SV=4 - [EF2_HUMAN]	1	1	P13639	C5(Carbamidomethyl)	HCD	1	0	1	1	0	5.12e-06	21	22	3.19	0	25	12	26000000	2	604.755	1208.5	0	-0.84	27.9	9170	9170	MS2	0/0	0	0	hala.raw
High	A	2	HEQNIDcGGGYVK	3439	Unambiguous	Calreticulin OS=Homo sapiens OX=9606 GN=CALR PE=1 SV=1 - [CALR_HUMAN]	1	1	P27797	C7(Carbamidomethyl)	HCD	1	0	1	1	0	9.91e-09	57	61	3.77	0	14	52	10800000	2	738.83	1476.65	0	-0.36	27.91	9175	9175	MS2	0/0	0	0	hala.raw
Middle	A	2	DWHRPcLK	4457	Unambiguous	Cysteine-rich protein 1 OS=Homo sapiens OX=9606 GN=CRIP1 PE=1 SV=3 - [CRIP1_HUMAN]	1	1	P50238	C6(Carbamidomethyl)	HCD	1	0	1	1	0.013	0.186	129	129	1.3	0	30	56	2950000	3	371.186	1111.54	0	-2.01	27.91	9176	9176	MS2	0/0	0	0	hala.raw
High	A	2	SQLLGSAHEVQR	4895	Unambiguous	Spectrin alpha chain, non-erythrocytic 1 OS=Homo sapiens OX=9606 GN=SPTAN1 PE=1 SV=3 - [SPTN1_HUMAN]	1	1	Q13813		HCD	1	0	1	1	0	6.24e-05	178	196	1.94	0	48	60	3500000	2	662.851	1324.7	0	-1.03	27.91	9178	9178	MS2	0/0	0	0	hala.raw
High	A	2	QTYSTEPNNLK	3989	Rejected	60S ribosomal protein L28 OS=Homo sapiens OX=9606 GN=RPL28 PE=1 SV=3 - [RL28_HUMAN]	1	1	P46779		HCD	0.0127	0	1	1	0	0.00182	175	186	1.57	0	18	60	9380000	2	647.819	1294.63	0	2.05	27.92	9181	9181	MS2	0/0	0	0	hala.raw
High	A	2	VAPAQPSEEGPGR	2422	Selected	Eukaryotic translation initiation factor 4B OS=Homo sapiens OX=9606 GN=EIF4B PE=1 SV=2 - [IF4B_HUMAN]	1	1	P23588		HCD		0.0127	2	2	0.007	0.0962	175	186	1.55	0	18	60	9380000	2	647.819	1294.63	0	-6.67	27.92	9181	9181	MS2	0/0	0	0	hala.raw
High	A	2	AVTEQGHELSNEER	2348	Unambiguous	14-3-3 protein beta/alpha OS=Homo sapiens OX=9606 GN=YWHAB PE=1 SV=3 - [1433B_HUMAN]	1	1	P31946		HCD	1	0	1	1	0	1.11e-07	123	136	2.93	0	0	60	6370000	2	799.874	1598.74	0	-0.33	27.92	9182	9182	MS2	0/0	0	0	hala.raw
High	A	2	APEQEQAAPGPAAGGEAPK	3410	Unambiguous	Brain acid soluble protein 1 OS=Homo sapiens OX=9606 GN=BASP1 PE=1 SV=2 - [BASP1_HUMAN]	1	1	P80723		HCD	1	0	1	1	0	3.05e-07	180	154	3.83	0	1	60	11500000	2	888.432	1775.86	0	0.36	27.93	9184	9184	MS2	0/0	0	0	hala.raw
High	A	2	EMGTPDVR	4121	Unambiguous	60S ribosomal protein L31 OS=Homo sapiens OX=9606 GN=RPL31 PE=1 SV=1 - [RL31_HUMAN]	1	1	P62899		HCD	1	0	1	1	0.004	0.0516	86	89	1.35	0	64	15	6280000	2	452.713	904.419	0	-0.53	27.93	9185	9185	MS2	0/0	0	0	hala.raw
High	A	2	TPGPGAQSALR	3894	Unambiguous	40S ribosomal protein S14 OS=Homo sapiens OX=9606 GN=RPS14 PE=1 SV=3 - [RS14_HUMAN]	1	1	P62263		HCD	1	0	1	1	0	5.28e-05	140	142	2.11	0	65	7	18800000	2	527.785	1054.56	0	-0.37	27.93	9187	9187	MS2	0/0	0	0	hala.raw
High	A	2	RDPHLAcVAYER	4911	Unambiguous	Clathrin heavy chain 1 OS=Homo sapiens OX=9606 GN=CLTC PE=1 SV=5 - [CLH1_HUMAN]	2	1	Q00610	C7(Carbamidomethyl)	HCD	1	0	1	1	0.004	0.0553	151	155	2.06	1	59	13	14400000	3	496.245	1486.72	0	-0.45	27.94	9188	9188	MS2	0/0	0	0	hala.raw
High	A	2	HSGPNSADSANDGFVR	3868	Unambiguous	Heterogeneous nuclear ribonucleoprotein F OS=Homo sapiens OX=9606 GN=HNRNPF PE=1 SV=3 - [HNRPF_HUMAN]	1	1	P52597		HCD	1	0	1	1	0	0.00244	43	49	1.92	0	72	60	2360000	2	815.862	1630.72	0	-2.77	27.94	9189	9189	MS2	0/0	0	0	hala.raw
High	A	2	SSGSPYGGGYGSGGGSGGYGSR	4915	Unambiguous	Heterogeneous nuclear ribonucleoprotein A3 OS=Homo sapiens OX=9606 GN=HNRNPA3 PE=1 SV=2 - [ROA3_HUMAN]	1	1	P51991		HCD	1	0	1	1	0	2.36e-09	27	30	3.19	0	0	60	1640000	2	955.899	1910.79	0	-0.04	27.94	9191	9191	MS2	0/0	0	0	hala.raw
High	A	2	IQEAGTEVVK	4041	Unambiguous	Malate dehydrogenase, mitochondrial OS=Homo sapiens OX=9606 GN=MDH2 PE=1 SV=3 - [MDHM_HUMAN]	1	1	P40926		HCD	1	0	1	1	0.001	0.011	236	247	1.7	0	75	24	5750000	2	537.295	1073.58	0	-1.01	27.96	9198	9198	MS2	0/0	0	0	hala.raw
High	A	2	TGVHHYSGNNIELGTAcGK	4927	Unambiguous	60S ribosomal protein L30 OS=Homo sapiens OX=9606 GN=RPL30 PE=1 SV=2 - [RL30_HUMAN]	1	1	P62888	C17(Carbamidomethyl)	HCD	1	0	1	1	0	2.92e-05	109	115	2.43	0	0	60	1150000	2	1007.97	2014.94	0	0.41	27.96	9199	9199	MS2	0/0	0	0	hala.raw
High	A	2	AGFAGDDAPR	3795	Unambiguous	Actin, alpha cardiac muscle 1 OS=Homo sapiens OX=9606 GN=ACTC1 PE=1 SV=1 - [ACTC_HUMAN]|Actin, cytoplasmic 1 OS=Homo sapiens OX=9606 GN=ACTB PE=1 SV=1 - [ACTB_HUMAN]	10	2	P68032;P60709		HCD	1	0	1	1	0	0.000121	78	86	1.48	0	12	2	132000000	2	488.728	976.449	0	0.69	27.96	9200	9200	MS2	0/0	0	0	hala.raw
High	A	2	AQAAAPASVPAQAPK	4933	Unambiguous	60S ribosomal protein L29 OS=Homo sapiens OX=9606 GN=RPL29 PE=1 SV=2 - [RL29_HUMAN]	1	1	P47914		HCD	1	0	1	1	0	4.46e-07	204	235	2.65	0	28	55	10700000	2	689.379	1377.75	0	1.07	27.96	9202	9202	MS2	0/0	0	0	hala.raw
High	A	2	QAASGLVGQENAR	4939	Unambiguous	RuvB-like 1 OS=Homo sapiens OX=9606 GN=RUVBL1 PE=1 SV=1 - [RUVB1_HUMAN]	1	1	Q9Y265		HCD	1	0	1	1	0	0.00022	162	176	2.2	0	59	60	3210000	2	650.84	1300.67	0.01	9.09	27.97	9205	9205	MS2	0/0	0	0	hala.raw
High	A	2	IIAPPER	4510	Unambiguous	Actin, alpha cardiac muscle 1 OS=Homo sapiens OX=9606 GN=ACTC1 PE=1 SV=1 - [ACTC_HUMAN]|Beta-actin-like protein 2 OS=Homo sapiens OX=9606 GN=ACTBL2 PE=1 SV=2 - [ACTBL_HUMAN]|Actin, cytoplasmic 1 OS=Homo sapiens OX=9606 GN=ACTB PE=1 SV=1 - [ACTB_HUMAN]	7	3	P68032;Q562R1;P60709		HCD	1	0	1	1	0.003	0.0418	61	60	1.68	0	3	4	56700000	2	398.24	795.472	0	-0.49	27.97	9207	9207	MS2	0/0	0	0	hala.raw
High	A	2	DSYVGDEAQSK	2007	Unambiguous	Actin, alpha cardiac muscle 1 OS=Homo sapiens OX=9606 GN=ACTC1 PE=1 SV=1 - [ACTC_HUMAN]|Actin, cytoplasmic 1 OS=Homo sapiens OX=9606 GN=ACTB PE=1 SV=1 - [ACTB_HUMAN]	6	2	P68032;P60709		HCD	1	0	1	1	0	0.0022	57	54	1.61	0	17	3	76200000	2	599.765	1198.52	0	-0.32	27.98	9208	9208	MS2	0/0	0	0	hala.raw
High	A	2	YESLTDPSK	4512	Unambiguous	Heat shock protein HSP 90-beta OS=Homo sapiens OX=9606 GN=HSP90AB1 PE=1 SV=4 - [HS90B_HUMAN]|Heat shock protein HSP 90-alpha OS=Homo sapiens OX=9606 GN=HSP90AA1 PE=1 SV=5 - [HS90A_HUMAN]|Putative heat shock protein HSP 90-beta 4 OS=Homo sapiens OX=9606 GN=HSP90AB4P PE=5 SV=1 - [H90B4_HUMAN]	5	2	P08238;P07900		HCD	1	0	1	1	0	0.00387	113	115	1.83	0	31	14	11600000	2	520.248	1039.49	0	-4.89	27.98	9209	9209	MS2	0/0	0	0	hala.raw
High	A	2	HEAFESDLAAHQDR	4947	Unambiguous	Alpha-actinin-1 OS=Homo sapiens OX=9606 GN=ACTN1 PE=1 SV=2 - [ACTN1_HUMAN]|Alpha-actinin-2 OS=Homo sapiens OX=9606 GN=ACTN2 PE=1 SV=1 - [ACTN2_HUMAN]|Alpha-actinin-4 OS=Homo sapiens OX=9606 GN=ACTN4 PE=1 SV=2 - [ACTN4_HUMAN]	4	2	P12814;O43707		HCD	1	0	1	1	0	1.05e-07	64	67	3.67	0	29	60	10600000	3	542.581	1625.73	0	-0.5	27.98	9211	9211	MS2	0/0	0	0	hala.raw
High	A	2	VLVAQHDVYK	4950	Unambiguous	Electron transfer flavoprotein subunit alpha, mitochondrial OS=Homo sapiens OX=9606 GN=ETFA PE=1 SV=1 - [ETFA_HUMAN]	1	1	P13804		HCD	1	0	1	2	0.007	0.096	241	225	1.32	0	32	54	4040000	3	391.22	1171.65	0	-0.17	27.98	9212	9212	MS2	0/0	0	0	hala.raw
High	A	2	HEAFESDLAAHQDR	4947	Unambiguous	Alpha-actinin-1 OS=Homo sapiens OX=9606 GN=ACTN1 PE=1 SV=2 - [ACTN1_HUMAN]|Alpha-actinin-2 OS=Homo sapiens OX=9606 GN=ACTN2 PE=1 SV=1 - [ACTN2_HUMAN]|Alpha-actinin-4 OS=Homo sapiens OX=9606 GN=ACTN4 PE=1 SV=2 - [ACTN4_HUMAN]	4	2	P12814;O43707		HCD	1	0	1	1	0	6.37e-05	85	97	2.37	0	0	60	2840000	2	813.372	1625.74	0	3.64	27.99	9216	9216	MS2	0/0	0	0	hala.raw
Middle	A	2	TTHFVEGGDAGNREDQINR	3910	Unambiguous	60S ribosomal protein L7 OS=Homo sapiens OX=9606 GN=RPL7 PE=1 SV=1 - [RL7_HUMAN]	1	1	P18124		HCD	1	0	1	1	0.015	0.2	103	114	1.35	1	23	60	1040000	2	1058.49	2115.98	0	-1.41	27.99	9218	9218	MS2	0/0	0	0	hala.raw
High	A	2	YTcSFcGK	3898	Unambiguous	60S ribosomal protein L37a OS=Homo sapiens OX=9606 GN=RPL37A PE=1 SV=2 - [RL37A_HUMAN]	2	1	P61513	C3(Carbamidomethyl); C6(Carbamidomethyl)	HCD	1	0	1	1	0.001	0.0207	17	8	1.53	0	55	60	5240000	2	511.707	1022.41	0	-0.01	28	9221	9221	MS2	0/0	0	0	hala.raw
Middle	A	2	LSQAEER	4975	Unambiguous	Sodium channel and clathrin linker 1 OS=Homo sapiens OX=9606 GN=SCLT1 PE=1 SV=2 - [SCLT1_HUMAN]	1	1	Q96NL6		HCD	1	0	1	1	0.01	0.146	227	210	1.21	0	55	5	21700000	2	416.714	832.421	0	5.99	28.01	9225	9225	MS2	0/0	0	0	hala.raw
Middle	A	2	LEQSTIVK	4977	Unambiguous	Peptidyl-prolyl cis-trans isomerase FKBP4 OS=Homo sapiens OX=9606 GN=FKBP4 PE=1 SV=3 - [FKBP4_HUMAN]	1	1	Q02790		HCD	1	0	1	1	0.036	0.376	183	201	1.83	0	72	9	8630000	2	459.269	917.531	0	1	28.01	9226	9226	MS2	0/0	0	0	hala.raw
High	A	2	YFDPANGK	4979	Unambiguous	Elongation factor 2 OS=Homo sapiens OX=9606 GN=EEF2 PE=1 SV=4 - [EF2_HUMAN]	1	1	P13639		HCD	1	0	1	1	0.001	0.0154	88	82	1.45	0	23	7	31200000	2	456.217	911.427	0	1.65	28.01	9227	9227	MS2	0/0	0	0	hala.raw
High	A	2	cYEMASHLR	4981	Unambiguous	Profilin-1 OS=Homo sapiens OX=9606 GN=PFN1 PE=1 SV=2 - [PROF1_HUMAN]	1	1	P07737	C1(Carbamidomethyl)	HCD	1	0	1	1	0	0.000183	67	61	2.31	0	31	20	7490000	3	389.508	1166.51	0	0.77	28.01	9228	9228	MS2	0/0	0	0	hala.raw
High	A	2	EAHEPLAVADAK	4985	Unambiguous	Nucleolar protein 58 OS=Homo sapiens OX=9606 GN=NOP58 PE=1 SV=1 - [NOP58_HUMAN]	1	1	Q9Y2X3		HCD	1	0	1	1	0	0.00314	197	194	2.21	0	63	60	4050000	2	625.823	1250.64	0	0.59	28.02	9230	9230	MS2	0/0	0	0	hala.raw
High	A	2	LFQEccPHSTDR	4152	Unambiguous	Heterogeneous nuclear ribonucleoprotein K OS=Homo sapiens OX=9606 GN=HNRNPK PE=1 SV=1 - [HNRPK_HUMAN]	1	1	P61978	C5(Carbamidomethyl); C6(Carbamidomethyl)	HCD	1	0	1	1	0	4.85e-06	33	20	2.48	0	8	60	2660000	2	775.33	1549.65	0	0.31	28.02	9231	9231	MS2	0/0	0	0	hala.raw
High	A	2	NcTIVSPDAGGAK	4989	Unambiguous	Ribose-phosphate pyrophosphokinase 1 OS=Homo sapiens OX=9606 GN=PRPS1 PE=1 SV=2 - [PRPS1_HUMAN]	1	1	P60891	C2(Carbamidomethyl)	HCD	1	0	1	1	0	7.02e-05	125	134	1.93	0	34	60	1920000	2	645.312	1289.62	0	1.25	28.02	9232	9232	MS2	0/0	0	0	hala.raw
High	A	2	DDEVAQLK	4991	Unambiguous	L-lactate dehydrogenase B chain OS=Homo sapiens OX=9606 GN=LDHB PE=1 SV=2 - [LDHB_HUMAN]	1	1	P07195		HCD	1	0	1	1	0.008	0.127	135	132	1.86	0	72	26	10000000	2	459.233	917.459	0	1.14	28.02	9233	9233	MS2	0/0	0	0	hala.raw
Middle	A	2	TQLEINGR	4994	Unambiguous	Muscleblind-like protein 3 OS=Homo sapiens OX=9606 GN=MBNL3 PE=1 SV=2 - [MBNL3_HUMAN]	3	1	Q9NUK0		HCD	1	0	1	2	0.047	0.456	325	306	1.44	0	69	14	6770000	2	465.757	930.507	0	7.14	28.02	9234	9234	MS2	0/0	0	0	hala.raw
Middle	A	2	MYSYPAR	4568	Unambiguous	Heterogeneous nuclear ribonucleoproteins C1/C2 OS=Homo sapiens OX=9606 GN=HNRNPC PE=1 SV=4 - [HNRPC_HUMAN]	1	1	P07910		HCD	1	0	1	1	0.026	0.292	64	63	1.33	0	55	13	9740000	2	444.208	887.409	0	0.81	28.04	9241	9241	MS2	0/0	0	0	hala.raw
High	A	2	LEcVEPNcR	3801	Unambiguous	60S ribosomal protein L36a OS=Homo sapiens OX=9606 GN=RPL36A PE=1 SV=2 - [RL36A_HUMAN]	2	1	P83881	C3(Carbamidomethyl); C8(Carbamidomethyl)	HCD	1	0	1	1	0	0.00195	46	46	1.94	0	54	17	9240000	2	588.76	1176.51	0	-0.26	28.04	9242	9242	MS2	0/0	0	0	hala.raw
High	A	2	cYEMASHLR	4981	Unambiguous	Profilin-1 OS=Homo sapiens OX=9606 GN=PFN1 PE=1 SV=2 - [PROF1_HUMAN]	1	1	P07737	C1(Carbamidomethyl)	HCD	1	0	1	1	0	0.000762	63	57	2.4	0	41	48	13900000	2	583.757	1166.51	0	-1.1	28.04	9245	9245	MS2	0/0	0	0	hala.raw
Middle	A	2	ETKPEPMEEDLPENKK	5015	Unambiguous	Stress-induced-phosphoprotein 1 OS=Homo sapiens OX=9606 GN=STIP1 PE=1 SV=1 - [STIP1_HUMAN]	1	1	P31948		HCD	1	0	1	1	0.018	0.23	149	147	2.65	1	16	60	8510000	3	638.643	1913.92	0	-0.33	28.04	9246	9246	MS2	0/0	0	0	hala.raw
High	A	2	GNLGAGNGNLQGPR	5017	Unambiguous	Matrin-3 OS=Homo sapiens OX=9606 GN=MATR3 PE=1 SV=2 - [MATR3_HUMAN]	1	1	P43243		HCD	1	0	1	1	0	3.86e-06	174	168	3.11	0	43	60	7100000	2	662.837	1324.67	0	-3.07	28.05	9247	9247	MS2	0/0	0	0	hala.raw
High	A	2	APKPDGPGGGPGGSHMGGNYGDDR	1814	Unambiguous	RNA-binding protein FUS OS=Homo sapiens OX=9606 GN=FUS PE=1 SV=1 - [FUS_HUMAN]	1	1	P35637		HCD	1	0	1	1	0	0.00254	25	33	1.93	0	33	60	2140000	3	751.664	2252.98	0	0.93	28.05	9248	9248	MS2	0/0	0	0	hala.raw
High	A	2	HTGPNSPDTANDGFVR	5021	Unambiguous	Heterogeneous nuclear ribonucleoprotein H2 OS=Homo sapiens OX=9606 GN=HNRNPH2 PE=1 SV=1 - [HNRH2_HUMAN]|Heterogeneous nuclear ribonucleoprotein H OS=Homo sapiens OX=9606 GN=HNRNPH1 PE=1 SV=4 - [HNRH1_HUMAN]	2	2	P55795;P31943		HCD	1	0	1	1	0	1.95e-07	98	98	2.81	0	55	60	3880000	2	842.887	1684.77	0	-0.34	28.05	9249	9249	MS2	0/0	0	0	hala.raw
Middle	A	2	DETLQAAVR	5023	Unambiguous	Calcium-independent phospholipase A2-gamma OS=Homo sapiens OX=9606 GN=PNPLA8 PE=1 SV=1 - [PLPL8_HUMAN]	1	1	Q9NP80		HCD	1	0	1	1	0.011	0.148	247	246	1.49	0	83	26	2990000	2	501.766	1002.52	0	2.65	28.05	9250	9250	MS2	0/0	0	0	hala.raw
High	A	2	ILEQEEEEEQAGKPGEPSK	5025	Unambiguous	Serrate RNA effector molecule homolog OS=Homo sapiens OX=9606 GN=SRRT PE=1 SV=1 - [SRRT_HUMAN]	1	1	Q9BXP5		HCD	1	0	1	1	0	0.00295	153	142	1.73	0	64	60	2700000	3	709.674	2127.01	0	0.02	28.05	9251	9251	MS2	0/0	0	0	hala.raw
High	A	2	ETMQSLNDR	1322	Unambiguous	Keratin, type I cytoskeletal 18 OS=Homo sapiens OX=9606 GN=KRT18 PE=1 SV=2 - [K1C18_HUMAN]	2	1	P05783		HCD	1	0	1	1	0	0.000994	77	64	1.93	0	38	10	15700000	2	547.25	1093.49	0	-0.55	28.06	9253	9253	MS2	0/0	0	0	hala.raw
High	A	2	AAEAAAAPAESAAPAAGEEPSK	5029	Unambiguous	Brain acid soluble protein 1 OS=Homo sapiens OX=9606 GN=BASP1 PE=1 SV=2 - [BASP1_HUMAN]	1	1	P80723		HCD	1	0	1	1	0	9.96e-07	130	139	2.95	0	8	60	6210000	2	983.972	1966.94	0	0.92	28.06	9254	9254	MS2	0/0	0	0	hala.raw
High	A	2	LNFSHGTHEYHAETIK	5031	Unambiguous	Pyruvate kinase PKM OS=Homo sapiens OX=9606 GN=PKM PE=1 SV=4 - [KPYM_HUMAN]	1	1	P14618		HCD	1	0	1	1	0	7.94e-05	168	185	2.23	0	15	60	2360000	2	942.457	1883.91	0	1.6	28.06	9255	9255	MS2	0/0	0	0	hala.raw
High	A	2	HTGPNSPDTANDGFVR	5021	Unambiguous	Heterogeneous nuclear ribonucleoprotein H2 OS=Homo sapiens OX=9606 GN=HNRNPH2 PE=1 SV=1 - [HNRH2_HUMAN]|Heterogeneous nuclear ribonucleoprotein H OS=Homo sapiens OX=9606 GN=HNRNPH1 PE=1 SV=4 - [HNRH1_HUMAN]	2	2	P55795;P31943		HCD	1	0	1	1	0	0.000175	103	104	2.87	0	23	16	12900000	3	562.261	1684.77	0	0.45	28.06	9257	9257	MS2	0/0	0	0	hala.raw
High	A	2	NQNSWGTGEDVK	5035	Unambiguous	Lamin-B1 OS=Homo sapiens OX=9606 GN=LMNB1 PE=1 SV=2 - [LMNB1_HUMAN]	1	1	P20700		HCD	1	0	1	1	0	5.22e-05	64	62	2.56	0	38	56	10300000	2	667.802	1334.6	0	-0.35	28.07	9258	9258	MS2	0/0	0	0	hala.raw
High	A	2	SAVENcQDSWR	5037	Unambiguous	6-phosphogluconate dehydrogenase, decarboxylating OS=Homo sapiens OX=9606 GN=PGD PE=1 SV=3 - [6PGD_HUMAN]	1	1	P52209	C6(Carbamidomethyl)	HCD	1	0	1	1	0	0.00106	27	20	1.84	0	57	60	2850000	2	676.289	1351.57	0	0.93	28.07	9259	9259	MS2	0/0	0	0	hala.raw
Middle	A	2	DVYKMQFYSSTSPPQKFSR	5045	Unambiguous	Cilia- and flagella-associated protein 47 OS=Homo sapiens OX=9606 GN=CFAP47 PE=2 SV=5 - [CFA47_HUMAN]	1	1	Q6ZTR5		HCD	1	0	1	2	0.036	0.382	165	148	1	2	35	16	3230000	6	383.524	2296.11	0	1.46	28.07	9262	9262	MS2	0/0	0	0	hala.raw
High	A	2	NEEPSEEEIDAPKPK	5047	Unambiguous	Nucleolar RNA helicase 2 OS=Homo sapiens OX=9606 GN=DDX21 PE=1 SV=5 - [DDX21_HUMAN]	1	1	Q9NR30		HCD	1	0	1	1	0	0.0023	123	136	1.54	0	24	60	2870000	2	856.406	1711.8	0	0.92	28.07	9263	9263	MS2	0/0	0	0	hala.raw
High	A	2	AAEAAAAPAESAAPAAGEEPSKEEGEPK	5053	Unambiguous	Brain acid soluble protein 1 OS=Homo sapiens OX=9606 GN=BASP1 PE=1 SV=2 - [BASP1_HUMAN]	1	1	P80723		HCD	1	0	1	1	0.003	0.0483	124	110	1.58	1	34	60	949000	3	879.416	2636.23	0	0.28	28.08	9266	9266	MS2	0/0	0	0	hala.raw
High	A	2	YRPGTVALR	4616	Unambiguous	Histone H3.1 OS=Homo sapiens OX=9606 GN=HIST1H3A PE=1 SV=2 - [H31_HUMAN]	5	1	P68431		HCD	1	0	1	1	0	0.00199	148	158	2	0	12	1	181000000	2	516.801	1032.59	0	-0.15	28.08	9268	9268	MS2	0/0	0	0	hala.raw
High	A	2	MDSTEPPYSQK	3613	Unambiguous	Elongation factor 1-alpha 1 OS=Homo sapiens OX=9606 GN=EEF1A1 PE=1 SV=1 - [EF1A1_HUMAN]	2	1	P68104		HCD	1	0	1	1	0	0.00399	57	49	1.97	0	20	53	8270000	2	641.784	1282.56	0	-1.51	28.09	9269	9269	MS2	0/0	0	0	hala.raw
High	A	2	VNTLIRPDGEK	5061	Unambiguous	60S ribosomal protein L23a OS=Homo sapiens OX=9606 GN=RPL23A PE=1 SV=1 - [RL23A_HUMAN]	1	1	P62750		HCD	1	0	1	1	0	0.000102	169	164	3.04	0	39	17	22400000	2	621.345	1241.68	0	-1.01	28.09	9271	9271	MS2	0/0	0	0	hala.raw
High	A	2	LMSNLDSNR	5071	Unambiguous	Protein S100-A4 OS=Homo sapiens OX=9606 GN=S100A4 PE=1 SV=1 - [S10A4_HUMAN]	1	1	P26447		HCD	1	0	1	1	0	0.000231	141	137	1.79	0	3	3	93600000	2	525.256	1049.5	0	0.32	28.1	9277	9277	MS2	0/0	0	0	hala.raw
High	A	2	SNVSDAVAQSTR	4643	Unambiguous	Triosephosphate isomerase OS=Homo sapiens OX=9606 GN=TPI1 PE=1 SV=3 - [TPIS_HUMAN]	1	1	P60174		HCD	1	0	1	1	0	9.91e-05	171	178	1.96	0	35	7	24800000	2	617.804	1234.6	0	-1.72	28.1	9278	9278	MS2	0/0	0	0	hala.raw
High	A	2	EAQELSQNSAIK	4411	Unambiguous	Nucleolar RNA helicase 2 OS=Homo sapiens OX=9606 GN=DDX21 PE=1 SV=5 - [DDX21_HUMAN]	1	1	Q9NR30		HCD	1	0	1	1	0.001	0.0127	204	202	2.04	0	50	60	2790000	2	659.338	1317.67	0	3.56	28.11	9282	9282	MS2	0/0	0	0	hala.raw
High	A	2	LNFSHGTHEYHAETIK	5031	Unambiguous	Pyruvate kinase PKM OS=Homo sapiens OX=9606 GN=PKM PE=1 SV=4 - [KPYM_HUMAN]	1	1	P14618		HCD	1	0	1	1	0	3.15e-07	157	177	3.45	0	3	15	28400000	3	628.639	1883.9	0	-1.29	28.11	9284	9284	MS2	0/0	0	0	hala.raw
High	A	2	LDDPScPRPEcYR	5040	Unambiguous	Eukaryotic translation initiation factor 2 subunit 3 OS=Homo sapiens OX=9606 GN=EIF2S3 PE=1 SV=3 - [IF2G_HUMAN]	1	1	P41091	C6(Carbamidomethyl); C11(Carbamidomethyl)	HCD	1	0	1	1	0	0.00261	34	32	2.34	0	29	54	11300000	3	555.576	1664.71	0	-0.78	28.11	9285	9285	MS2	0/0	0	0	hala.raw
High	A	2	TIDDLEEK	5089	Unambiguous	Tropomyosin alpha-4 chain OS=Homo sapiens OX=9606 GN=TPM4 PE=1 SV=3 - [TPM4_HUMAN]	1	1	P67936		HCD	1	0	1	1	0	0.00739	175	147	1.52	0	48	10	11100000	2	481.737	962.467	0	-0.48	28.12	9287	9287	MS2	0/0	0	0	hala.raw
High	A	2	TVLcGTcGQPADK	5091	Unambiguous	Prelamin-A/C OS=Homo sapiens OX=9606 GN=LMNA PE=1 SV=1 - [LMNA_HUMAN]	1	1	P02545	C4(Carbamidomethyl); C7(Carbamidomethyl)	HCD	1	0	1	1	0	0.000133	106	91	2.03	0	4	53	5150000	2	703.824	1406.64	0	0.68	28.12	9288	9288	MS2	0/0	0	0	hala.raw
High	A	2	SDPVVSYR	5093	Unambiguous	Elongation factor 2 OS=Homo sapiens OX=9606 GN=EEF2 PE=1 SV=4 - [EF2_HUMAN]	1	1	P13639		HCD	1	0	1	1	0.004	0.0499	159	166	1.13	0	23	6	28200000	2	461.735	922.463	0	-0.16	28.13	9290	9290	MS2	0/0	0	0	hala.raw
High	A	2	LAVDEEENADNNTK	3902	Unambiguous	Transferrin receptor protein 1 OS=Homo sapiens OX=9606 GN=TFRC PE=1 SV=2 - [TFR1_HUMAN]	1	1	P02786		HCD	1	0	1	1	0	9.48e-06	70	51	2.4	0	54	60	4890000	2	781.353	1561.7	0	0.29	28.13	9292	9292	MS2	0/0	0	0	hala.raw
High	A	2	VAEDEAEAAAAAK	5099	Unambiguous	4F2 cell-surface antigen heavy chain OS=Homo sapiens OX=9606 GN=SLC3A2 PE=1 SV=3 - [4F2_HUMAN]	1	1	P08195		HCD	1	0	1	1	0	1.74e-05	118	132	2.57	0	45	60	11200000	2	623.302	1245.6	0	1.02	28.13	9294	9294	MS2	0/0	0	0	hala.raw
High	A	2	SVTEQGAELSNEER	5101	Unambiguous	14-3-3 protein zeta/delta OS=Homo sapiens OX=9606 GN=YWHAZ PE=1 SV=1 - [1433Z_HUMAN]	1	1	P63104		HCD	1	0	1	1	0	4.19e-07	108	95	2.96	0	21	60	6940000	2	774.861	1548.71	0	0.3	28.14	9295	9295	MS2	0/0	0	0	hala.raw
High	A	2	GANPVEIR	5105	Unambiguous	60 kDa heat shock protein, mitochondrial OS=Homo sapiens OX=9606 GN=HSPD1 PE=1 SV=2 - [CH60_HUMAN]	1	1	P10809		HCD	1	0	1	1	0.002	0.0228	118	116	2.02	0	50	60	4230000	2	428.238	855.469	0	0.6	28.14	9297	9297	MS2	0/0	0	0	hala.raw
Middle	A	2	GPPQEEEEEEDEEEEATK	5113	Unambiguous	Hepatoma-derived growth factor OS=Homo sapiens OX=9606 GN=HDGF PE=1 SV=1 - [HDGF_HUMAN]	1	1	P51858		HCD	1	0	1	1	0.025	0.285		4	0.79	0	20	60	2020000	2	1052.42	2103.83	0	-1.94	28.15	9301	9301	MS2	0/0	0	0	hala.raw
High	A	2	NQGGYGGSSSSSSYGSGR	1600	Unambiguous	Heterogeneous nuclear ribonucleoprotein A1 OS=Homo sapiens OX=9606 GN=HNRNPA1 PE=1 SV=5 - [ROA1_HUMAN]	1	1	P09651		HCD	1	0	1	1	0	1.44e-08	13	9	3.11	0	24	60	3050000	2	847.852	1694.7	0	-2.53	28.15	9303	9303	MS2	0/0	0	0	hala.raw
High	A	2	FGQGGAGPVGGQGPR	5121	Unambiguous	Splicing factor, proline- and glutamine-rich OS=Homo sapiens OX=9606 GN=SFPQ PE=1 SV=2 - [SFPQ_HUMAN]	1	1	P23246		HCD	1	0	1	1	0	6.5e-06	170	173	2.98	0	46	55	10500000	2	671.337	1341.67	0	0.75	28.16	9306	9306	MS2	0/0	0	0	hala.raw
High	A	2	YTIENPR	5123	Unambiguous	Staphylococcal nuclease domain-containing protein 1 OS=Homo sapiens OX=9606 GN=SND1 PE=1 SV=1 - [SND1_HUMAN]	1	1	Q7KZF4		HCD	1	0	1	1	0.004	0.0571	201	226	1.33	0	60	22	5500000	2	446.73	892.452	0	-0.15	28.16	9307	9307	MS2	0/0	0	0	hala.raw
High	A	2	DVDEAYMNK	5136	Unambiguous	Keratin, type II cytoskeletal 8 OS=Homo sapiens OX=9606 GN=KRT8 PE=1 SV=7 - [K2C8_HUMAN]	1	1	P05787		HCD	1	0	1	1	0.001	0.0175	41	37	1.32	0	44	20	17100000	2	542.734	1084.46	0	-0.57	28.18	9315	9315	MS2	0/0	0	0	hala.raw
High	A	2	AEAGPEGVAPAPEGEK	5138	Unambiguous	Hypoxia up-regulated protein 1 OS=Homo sapiens OX=9606 GN=HYOU1 PE=1 SV=1 - [HYOU1_HUMAN]	1	1	Q9Y4L1		HCD	1	0	1	1	0	0.000348	159	165	1.58	0	50	60	3800000	2	754.865	1508.72	0	0.56	28.18	9316	9316	MS2	0/0	0	0	hala.raw
High	A	2	IcDEcNYGSYQGR	5140	Unambiguous	PHD finger-like domain-containing protein 5A OS=Homo sapiens OX=9606 GN=PHF5A PE=1 SV=1 - [PHF5A_HUMAN]	1	1	Q7RTV0	C2(Carbamidomethyl); C5(Carbamidomethyl)	HCD	1	0	1	1	0	2.76e-06	8	8	2.23	0	8	60	2380000	2	811.319	1621.63	0	-3.61	28.18	9317	9317	MS2	0/0	0	0	hala.raw
High	A	2	ISSSSFSR	3579	Unambiguous	Keratin, type II cytoskeletal 8 OS=Homo sapiens OX=9606 GN=KRT8 PE=1 SV=7 - [K2C8_HUMAN]	1	1	P05787		HCD	1	0	1	1	0	0.00712	104	116	1.63	0	31	12	13600000	2	435.719	870.431	0	-0.53	28.18	9318	9318	MS2	0/0	0	0	hala.raw
High	A	2	FHHTFSTEIAK	5144	Unambiguous	Protein disulfide-isomerase A4 OS=Homo sapiens OX=9606 GN=PDIA4 PE=1 SV=2 - [PDIA4_HUMAN]	1	1	P13667		HCD	1	0	1	1	0.004	0.0538	205	173	1.36	0	35	21	5950000	3	439.891	1317.66	0	0.17	28.18	9319	9319	MS2	0/0	0	0	hala.raw
High	A	2	LNDGSQITYEK	5146	Unambiguous	Apoptosis-inducing factor 1, mitochondrial OS=Homo sapiens OX=9606 GN=AIFM1 PE=1 SV=1 - [AIFM1_HUMAN]	1	1	O95831		HCD	1	0	1	1	0.004	0.0589	141	155	1.36	0	29	60	3840000	2	634.313	1267.62	0	1.44	28.18	9320	9320	MS2	0/0	0	0	hala.raw
High	A	2	LSVDYGK	5156	Unambiguous	Tubulin alpha-1A chain OS=Homo sapiens OX=9606 GN=TUBA1A PE=1 SV=1 - [TBA1A_HUMAN]|Tubulin alpha-1B chain OS=Homo sapiens OX=9606 GN=TUBA1B PE=1 SV=1 - [TBA1B_HUMAN]|Tubulin alpha-1C chain OS=Homo sapiens OX=9606 GN=TUBA1C PE=1 SV=1 - [TBA1C_HUMAN]|Tubulin alpha-4A chain OS=Homo sapiens OX=9606 GN=TUBA4A PE=1 SV=1 - [TBA4A_HUMAN]	5	2	Q9BQE3;P68366		HCD	1	0	1	1	0.004	0.0516	132	140	1.56	0	17	13	20700000	2	391.208	781.408	0	-0.82	28.2	9327	9327	MS2	0/0	0	0	hala.raw
High	A	2	LLADQAEAR	5158	Unambiguous	60S ribosomal protein L19 OS=Homo sapiens OX=9606 GN=RPL19 PE=1 SV=1 - [RL19_HUMAN]	1	1	P84098		HCD	1	0	1	1	0.002	0.0295	143	160	1.35	0	60	7	13400000	2	493.767	986.526	0	-0.3	28.2	9328	9328	MS2	0/0	0	0	hala.raw
High	A	2	SLQSVAEER	5160	Unambiguous	60S ribosomal protein L15 OS=Homo sapiens OX=9606 GN=RPL15 PE=1 SV=2 - [RL15_HUMAN]	1	1	P61313		HCD	1	0	1	1	0	0.0047	202	211	1.6	0	33	11	11900000	2	509.762	1018.52	0	-0.25	28.2	9329	9329	MS2	0/0	0	0	hala.raw
High	A	2	GVEEEEEDGEMRE	4730	Unambiguous	Small nuclear ribonucleoprotein F OS=Homo sapiens OX=9606 GN=SNRPF PE=1 SV=1 - [RUXF_HUMAN]	1	1	P62306		HCD	1	0	1	1	0	0.00185	6	5	2.42	1	38	60	2400000	2	769.3	1537.59	0	-1.97	28.21	9330	9330	MS2	0/0	0	0	hala.raw
High	A	2	LQSIGTENTEENR	4724	Unambiguous	Fructose-bisphosphate aldolase A OS=Homo sapiens OX=9606 GN=ALDOA PE=1 SV=2 - [ALDOA_HUMAN]	1	1	P04075		HCD	1	0	1	1	0	9.48e-07	141	130	3.06	0	27	44	16300000	2	745.857	1490.71	0	-0.34	28.21	9331	9331	MS2	0/0	0	0	hala.raw
Middle	A	2	AFDQLR	5166	Unambiguous	Transketolase OS=Homo sapiens OX=9606 GN=TKT PE=1 SV=3 - [TKT_HUMAN]	2	1	P29401		HCD	1	0	1	1	0.017	0.218	262	272	1.29	0	44	27	10000000	2	375.2	749.393	0	-1.32	28.21	9332	9332	MS2	0/0	0	0	hala.raw
Middle	A	2	AFDQIR	5166	Unambiguous	Transketolase OS=Homo sapiens OX=9606 GN=TKT PE=1 SV=3 - [TKT_HUMAN]	2	1	P29401		HCD	1	0	1	2	0.017	0.218	262	272	1.29	0	44	27	10000000	2	375.2	749.393	0	-1.32	28.21	9332	9332	MS2	0/0	0	0	hala.raw
Middle	A	2	TTHFVEGGDAGNREDQINR	3910	Unambiguous	60S ribosomal protein L7 OS=Homo sapiens OX=9606 GN=RPL7 PE=1 SV=1 - [RL7_HUMAN]	1	1	P18124		HCD	1	0	1	1	0.047	0.451	107	116	2.67	1	20	51	5900000	3	705.997	2115.98	0	-1.13	28.22	9335	9335	MS2	0/0	0	0	hala.raw
High	A	2	LAQALHEMR	4386	Unambiguous	Lamin-B1 OS=Homo sapiens OX=9606 GN=LMNB1 PE=1 SV=2 - [LMNB1_HUMAN]	1	1	P20700		HCD	1	0	1	1	0.004	0.0596	131	144	1.63	0	90	60	176000	3	356.859	1068.56	0	0.68	28.22	9336	9336	MS2	0/0	0	0	hala.raw
High	A	2	ESEPQAAAEPAEAK	2735	Unambiguous	Brain acid soluble protein 1 OS=Homo sapiens OX=9606 GN=BASP1 PE=1 SV=2 - [BASP1_HUMAN]	1	1	P80723		HCD	1	0	1	1	0	1.44e-05	90	97	2.45	0	11	50	12100000	2	714.336	1427.67	0	0.26	28.23	9343	9343	MS2	0/0	0	0	hala.raw
High	A	2	LLEVEHPAAK	5188	Unambiguous	T-complex protein 1 subunit alpha OS=Homo sapiens OX=9606 GN=TCP1 PE=1 SV=1 - [TCPA_HUMAN]	1	1	P17987		HCD	1	0	1	1	0	0.00593	138	143	1.59	0	13	60	3890000	3	369.545	1106.62	0	-0.58	28.23	9344	9344	MS2	0/0	0	0	hala.raw
High	A	2	FNAHGDANTIVcNSK	5190	Unambiguous	Galectin-1 OS=Homo sapiens OX=9606 GN=LGALS1 PE=1 SV=2 - [LEG1_HUMAN]	1	1	P09382	C12(Carbamidomethyl)	HCD	1	0	1	1	0	1.02e-05	93	85	3.42	0	22	60	3190000	2	824.377	1647.75	0	-4.6	28.24	9345	9345	MS2	0/0	0	0	hala.raw
High	A	2	IANPVEGSTDR	5200	Unambiguous	Poly(rC)-binding protein 2 OS=Homo sapiens OX=9606 GN=PCBP2 PE=1 SV=1 - [PCBP2_HUMAN]	1	1	Q15366		HCD	1	0	1	1	0	1.32e-05	134	133	2.57	0	25	11	21000000	2	579.791	1158.57	0	-0.63	28.25	9351	9351	MS2	0/0	0	0	hala.raw
High	A	2	ADLAEEYSK	5202	Unambiguous	Ubiquitin-conjugating enzyme E2 L3 OS=Homo sapiens OX=9606 GN=UBE2L3 PE=1 SV=1 - [UB2L3_HUMAN]	1	1	P68036		HCD	1	0	1	1	0	0.00242	94	96	1.39	0	45	24	9190000	2	513.243	1025.48	0	0.3	28.25	9352	9352	MS2	0/0	0	0	hala.raw
High	A	2	FNAHGDANTIVcNSK	5190	Unambiguous	Galectin-1 OS=Homo sapiens OX=9606 GN=LGALS1 PE=1 SV=2 - [LEG1_HUMAN]	1	1	P09382	C12(Carbamidomethyl)	HCD	1	0	1	1	0	0.00202	109	103	2.26	0	49	25	7890000	3	549.923	1647.75	0	0.29	28.25	9353	9353	MS2	0/0	0	0	hala.raw
High	A	2	VSYGIGDEEHDQEGR	5206	Unambiguous	DNA-(apurinic or apyrimidinic site) lyase OS=Homo sapiens OX=9606 GN=APEX1 PE=1 SV=2 - [APEX1_HUMAN]	1	1	P27695		HCD	1	0	1	1	0	1.48e-06	48	30	2.61	0	27	60	3100000	2	845.87	1690.73	0	0.79	28.25	9354	9354	MS2	0/0	0	0	hala.raw
High	A	2	NIIHGSDSVESAEK	4256	Unambiguous	Nucleoside diphosphate kinase A OS=Homo sapiens OX=9606 GN=NME1 PE=1 SV=1 - [NDKA_HUMAN]	1	1	P15531		HCD	1	0	1	1	0	2.43e-05	142	150	2.42	0	37	60	7430000	2	743.363	1485.72	0	0.34	28.26	9356	9356	MS2	0/0	0	0	hala.raw
High	A	2	LLEVEHPAAK	5188	Unambiguous	T-complex protein 1 subunit alpha OS=Homo sapiens OX=9606 GN=TCP1 PE=1 SV=1 - [TCPA_HUMAN]	1	1	P17987		HCD	1	0	1	1	0	0.00117	138	143	1.65	0	60	17	7480000	2	553.813	1106.62	0	-0.96	28.27	9359	9359	MS2	0/0	0	0	hala.raw
High	A	2	NSMPASSFQQQK	5215	Unambiguous	Putative RNA-binding protein Luc7-like 2 OS=Homo sapiens OX=9606 GN=LUC7L2 PE=1 SV=2 - [LC7L2_HUMAN]	2	1	Q9Y383		HCD	1	0	1	1	0	0.000475	106	107	2.42	0	59	60	6480000	2	676.817	1352.63	0	0.1	28.27	9360	9360	MS2	0/0	0	0	hala.raw
Middle	A	2	ISSDLDGHPVPK	5217	Unambiguous	Transketolase OS=Homo sapiens OX=9606 GN=TKT PE=1 SV=3 - [TKT_HUMAN]	1	1	P29401		HCD	1	0	1	1	0.016	0.217	225	218	1.18	0	58	36	4970000	3	422.223	1264.65	0	0.27	28.27	9361	9361	MS2	0/0	0	0	hala.raw
High	A	2	QDVDNASLAR	3220	Unambiguous	Vimentin OS=Homo sapiens OX=9606 GN=VIM PE=1 SV=4 - [VIME_HUMAN]	1	1	P08670		HCD	1	0	1	1	0	6.77e-05	139	139	1.99	0	53	6	15000000	2	544.77	1088.53	0	-0.45	28.28	9366	9366	MS2	0/0	0	0	hala.raw
High	A	2	MRPGVAcSVSQAQK	3299	Unambiguous	60S ribosomal protein L9 OS=Homo sapiens OX=9606 GN=RPL9 PE=1 SV=1 - [RL9_HUMAN]	1	1	P32969	C7(Carbamidomethyl)	HCD	1	0	1	1	0	0.00219	192	184	2.11	0	45	19	9330000	3	506.922	1518.75	0	0.6	28.28	9368	9368	MS2	0/0	0	0	hala.raw
High	A	2	EASDPQPEEADGGLK	4768	Unambiguous	F-actin-capping protein subunit alpha-1 OS=Homo sapiens OX=9606 GN=CAPZA1 PE=1 SV=3 - [CAZA1_HUMAN]	1	1	P52907		HCD	1	0	1	1	0	0.00419	83	87	1.29	0	33	60	1930000	2	771.853	1542.7	0	3.82	28.29	9370	9370	MS2	0/0	0	0	hala.raw
Middle	A	2	QVDEFLASIASPSSDVPR	5237	Unambiguous	Inositol hexakisphosphate and diphosphoinositol-pentakisphosphate kinase 2 OS=Homo sapiens OX=9606 GN=PPIP5K2 PE=1 SV=3 - [VIP2_HUMAN]	1	1	O43314		HCD	1	0	1	1	0.031	0.343	167	193	1.1	0	38	60	1580000	2	959.476	1917.94	-0.01	-6.03	28.29	9371	9371	MS2	0/0	0	0	hala.raw
High	A	2	HVGDLGNVTADK	4788	Unambiguous	Superoxide dismutase [Cu-Zn] OS=Homo sapiens OX=9606 GN=SOD1 PE=1 SV=2 - [SODC_HUMAN]	1	1	P00441		HCD	1	0	1	1	0	2.8e-05	158	164	2.6	0	55	60	7980000	2	613.312	1225.62	0	-0.17	28.29	9373	9373	MS2	0/0	0	0	hala.raw
High	A	2	AQYEDIANR	4800	Unambiguous	Keratin, type II cytoskeletal 8 OS=Homo sapiens OX=9606 GN=KRT8 PE=1 SV=7 - [K2C8_HUMAN]	2	1	P05787		HCD	1	0	1	1	0	0.00705	138	131	1.39	0	56	5	22400000	2	540.26	1079.51	0	0.67	28.3	9377	9377	MS2	0/0	0	0	hala.raw
High	A	2	NHEEEMNALR	1245	Unambiguous	Keratin, type I cytoskeletal 17 OS=Homo sapiens OX=9606 GN=KRT17 PE=1 SV=2 - [K1C17_HUMAN]	2	1	Q04695		HCD	1	0	1	1	0	0.00163	54	45	2.42	0	49	15	18800000	2	621.781	1242.55	0	0.63	28.3	9378	9378	MS2	0/0	0	0	hala.raw
High	A	2	DVEDESTGLEK	5249	Unambiguous	Serpin B5 OS=Homo sapiens OX=9606 GN=SERPINB5 PE=1 SV=2 - [SPB5_HUMAN]	1	1	P36952		HCD	1	0	1	1	0	0.00101	86	81	1.74	0	49	17	13100000	2	611.28	1221.55	0	3.17	28.31	9379	9379	MS2	0/0	0	0	hala.raw
Middle	A	2	QWPcSSMPAKQAPPScVSEGSVK	5252	Unambiguous	Protein ITPRID1 OS=Homo sapiens OX=9606 GN=ITPRID1 PE=2 SV=2 - [ITPI1_HUMAN]	1	1	Q6ZRS4	C4(Carbamidomethyl); C16(Carbamidomethyl)	HCD	1	0	1	2	0.026	0.297	92	109	1.34	1	35	41	4470000	5	504.434	2518.14	0	-4.91	28.31	9380	9380	MS2	0/0	0	0	hala.raw
High	A	2	ETPAATEAPSSTPK	2813	Unambiguous	Brain acid soluble protein 1 OS=Homo sapiens OX=9606 GN=BASP1 PE=1 SV=2 - [BASP1_HUMAN]	1	1	P80723		HCD	1	0	1	1	0	2.83e-07	141	135	3.02	0	10	48	13100000	2	693.842	1386.68	0	0.76	28.31	9382	9382	MS2	0/0	0	0	hala.raw
High	A	2	ISSDLDGHPVPK	5217	Unambiguous	Transketolase OS=Homo sapiens OX=9606 GN=TKT PE=1 SV=3 - [TKT_HUMAN]	1	1	P29401		HCD	1	0	1	1	0	0.00115	225	218	2.32	0	35	60	6920000	2	632.83	1264.65	0	0.29	28.32	9384	9384	MS2	0/0	0	0	hala.raw
High	A	2	HRPELIDYGK	5262	Unambiguous	Alpha-actinin-1 OS=Homo sapiens OX=9606 GN=ACTN1 PE=1 SV=2 - [ACTN1_HUMAN]	1	1	P12814		HCD	1	0	1	1	0	0.00607	177	170	1.81	0	43	18	5190000	3	409.888	1227.65	0	0.36	28.32	9386	9386	MS2	0/0	0	0	hala.raw
High	A	2	LIEVDDERK	4123	Unambiguous	40S ribosomal protein S6 OS=Homo sapiens OX=9606 GN=RPS6 PE=1 SV=1 - [RS6_HUMAN]	1	1	P62753		HCD	1	0	1	1	0.004	0.0617	185	195	1.78	1	24	60	2870000	3	372.868	1116.59	0	-0.18	28.32	9388	9388	MS2	0/0	0	0	hala.raw
High	A	2	VTLTSEEEAR	4815	Unambiguous	L-lactate dehydrogenase A chain OS=Homo sapiens OX=9606 GN=LDHA PE=1 SV=2 - [LDHA_HUMAN]	1	1	P00338		HCD	1	0	1	1	0	6.05e-05	244	223	1.85	0	37	3	33600000	2	567.786	1134.56	0	1.08	28.33	9390	9390	MS2	0/0	0	0	hala.raw
Middle	A	2	EVSTYIK	150	Unambiguous	Elongation factor 1-alpha 1 OS=Homo sapiens OX=9606 GN=EEF1A1 PE=1 SV=1 - [EF1A1_HUMAN]	2	1	P68104		HCD	1	0	1	1	0.016	0.213	125	142	1.26	0	6	8	22000000	2	420.23	839.452	0	1.72	28.35	9396	9396	MS2	0/0	0	0	hala.raw
High	A	2	VAIEPGAPR	5278	Unambiguous	Sorbitol dehydrogenase OS=Homo sapiens OX=9606 GN=SORD PE=1 SV=4 - [DHSO_HUMAN]	1	1	Q00796		HCD	1	0	1	1	0	0.00979	126	122	1.75	0	23	16	9110000	2	455.262	909.517	0	2.35	28.35	9397	9397	MS2	0/0	0	0	hala.raw
High	A	2	ADLDVSGPK	5282	Unambiguous	Neuroblast differentiation-associated protein AHNAK OS=Homo sapiens OX=9606 GN=AHNAK PE=1 SV=2 - [AHNK_HUMAN]	1	1	Q09666		HCD	1	0	1	1	0	0.00245	94	111	1.72	0	38	13	9170000	2	451.235	901.462	0	-0.63	28.35	9400	9400	MS2	0/0	0	0	hala.raw
High	A	2	ADIDVSGPK	5282	Unambiguous	Neuroblast differentiation-associated protein AHNAK OS=Homo sapiens OX=9606 GN=AHNAK PE=1 SV=2 - [AHNK_HUMAN]	1	1	Q09666		HCD	1	0	1	2	0	0.00245	94	111	1.72	0	38	13	9170000	2	451.235	901.462	0	-0.63	28.35	9400	9400	MS2	0/0	0	0	hala.raw
Middle	A	2	YYLAPK	5289	Unambiguous	Proliferating cell nuclear antigen OS=Homo sapiens OX=9606 GN=PCNA PE=1 SV=1 - [PCNA_HUMAN]	1	1	P12004		HCD	1	0	1	1	0.034	0.366	140	161	0.97	0	73	32	3460000	2	377.711	754.414	0	0.68	28.36	9404	9404	MS2	0/0	0	0	hala.raw
High	A	2	VIGSGcNLDSAR	5297	Unambiguous	L-lactate dehydrogenase B chain OS=Homo sapiens OX=9606 GN=LDHB PE=1 SV=2 - [LDHB_HUMAN]|L-lactate dehydrogenase A chain OS=Homo sapiens OX=9606 GN=LDHA PE=1 SV=2 - [LDHA_HUMAN]	4	2	P07195;P00338	C6(Carbamidomethyl)	HCD	1	0	1	1	0	0.000191	162	138	1.95	0	50	60	5690000	2	624.806	1248.6	0	3.69	28.37	9408	9408	MS2	0/0	0	0	hala.raw
High	A	2	EIAQDFK	4854	Unambiguous	Histone H3.1 OS=Homo sapiens OX=9606 GN=HIST1H3A PE=1 SV=2 - [H31_HUMAN]	4	1	P68431		HCD	1	0	1	1	0.006	0.0853	133	162	1.42	0	3	2	118000000	2	425.719	850.431	0	0.12	28.38	9410	9410	MS2	0/0	0	0	hala.raw
High	A	2	HQGVMVGMGQK	4226	Unambiguous	Actin, alpha cardiac muscle 1 OS=Homo sapiens OX=9606 GN=ACTC1 PE=1 SV=1 - [ACTC_HUMAN]|Beta-actin-like protein 2 OS=Homo sapiens OX=9606 GN=ACTBL2 PE=1 SV=2 - [ACTBL_HUMAN]|Actin, cytoplasmic 1 OS=Homo sapiens OX=9606 GN=ACTB PE=1 SV=1 - [ACTB_HUMAN]	7	3	P68032;Q562R1;P60709		HCD	1	0	1	1	0.002	0.0276	125	123	1.96	0	67	60	3290000	2	586.289	1171.57	0	-0.97	28.38	9411	9411	MS2	0/0	0	0	hala.raw
Middle	A	2	QLGYPPGWLK	5292	Unambiguous	Zinc finger CCHC domain-containing protein 8 OS=Homo sapiens OX=9606 GN=ZCCHC8 PE=1 SV=2 - [ZCHC8_HUMAN]	1	1	Q6NZY4		HCD	1	0	1	1	0.028	0.319	202	200	1.47	0	37	5	27200000	2	579.821	1158.64	0	4.33	28.38	9413	9413	MS2	0/0	0	0	hala.raw
High	A	2	EVATNSELVQSGK	4862	Unambiguous	Keratin, type I cytoskeletal 17 OS=Homo sapiens OX=9606 GN=KRT17 PE=1 SV=2 - [K1C17_HUMAN]	2	1	Q04695		HCD	1	0	1	1	0	5.98e-06	218	211	2.51	0	10	18	22400000	2	681.349	1361.69	0	0.24	28.38	9414	9414	MS2	0/0	0	0	hala.raw
High	A	2	SSFSHYSGLK	5307	Unambiguous	Plasminogen activator inhibitor 1 RNA-binding protein OS=Homo sapiens OX=9606 GN=SERBP1 PE=1 SV=2 - [PAIRB_HUMAN]	1	1	Q8NC51		HCD	1	0	1	1	0.001	0.0149	135	123	1.5	0	65	28	6210000	2	556.774	1112.54	0	3.21	28.39	9415	9415	MS2	0/0	0	0	hala.raw
High	A	2	NMMAAcDPR	4343	Unambiguous	Tubulin beta-2A chain OS=Homo sapiens OX=9606 GN=TUBB2A PE=1 SV=1 - [TBB2A_HUMAN]|Tubulin beta-3 chain OS=Homo sapiens OX=9606 GN=TUBB3 PE=1 SV=2 - [TBB3_HUMAN]|Tubulin beta-4A chain OS=Homo sapiens OX=9606 GN=TUBB4A PE=1 SV=2 - [TBB4A_HUMAN]|Tubulin beta-4B chain OS=Homo sapiens OX=9606 GN=TUBB4B PE=1 SV=1 - [TBB4B_HUMAN]|Tubulin beta chain OS=Homo sapiens OX=9606 GN=TUBB PE=1 SV=2 - [TBB5_HUMAN…	9	3	P68371;P07437;Q9BUF5	C6(Carbamidomethyl)	HCD	1	0	1	1	0	0.00662	14	13	1.88	0	42	10	22800000	2	533.217	1065.43	0	-0.08	28.39	9416	9416	MS2	0/0	0	0	hala.raw
High	A	2	ELTAVVQK	5311	Unambiguous	40S ribosomal protein S3 OS=Homo sapiens OX=9606 GN=RPS3 PE=1 SV=2 - [RS3_HUMAN]	1	1	P23396		HCD	1	0	1	1	0.001	0.0162	193	190	1.51	0	69	11	8150000	2	444.263	887.52	0	0	28.39	9417	9417	MS2	0/0	0	0	hala.raw
High	A	2	IEYNDQNDGScDVK	3599	Unambiguous	Filamin-B OS=Homo sapiens OX=9606 GN=FLNB PE=1 SV=2 - [FLNB_HUMAN]	1	1	O75369	C11(Carbamidomethyl)	HCD	1	0	1	1	0.001	0.0139	16	23	1.18	0	48	60	2720000	2	828.845	1656.68	0	1.13	28.39	9421	9421	MS2	0/0	0	0	hala.raw
High	A	2	IFVNDDR	5327	Unambiguous	Interleukin enhancer-binding factor 3 OS=Homo sapiens OX=9606 GN=ILF3 PE=1 SV=3 - [ILF3_HUMAN]	1	1	Q12906		HCD	1	0	1	1	0.001	0.0181	198	184	1.44	0	60	8	9030000	2	439.724	878.44	0	3.46	28.41	9426	9426	MS2	0/0	0	0	hala.raw
High	A	2	LSSEMNTSTVNSAR	5329	Unambiguous	Lamin-B1 OS=Homo sapiens OX=9606 GN=LMNB1 PE=1 SV=2 - [LMNB1_HUMAN]	1	1	P20700		HCD	1	0	1	1	0	2.17e-07	122	124	3.11	0	41	60	5170000	2	748.854	1496.7	0	-0.11	28.41	9427	9427	MS2	0/0	0	0	hala.raw
High	A	2	HEQNIDcGGGYVK	3439	Unambiguous	Calreticulin OS=Homo sapiens OX=9606 GN=CALR PE=1 SV=1 - [CALR_HUMAN]	1	1	P27797	C7(Carbamidomethyl)	HCD	1	0	1	1	0	4.65e-10	57	63	4.12	0	22	54	9220000	2	738.83	1476.65	0	-0.61	28.42	9430	9430	MS2	0/0	0	0	hala.raw
High	A	2	GMGPGTPAGYGR	5335	Unambiguous	Splicing factor, proline- and glutamine-rich OS=Homo sapiens OX=9606 GN=SFPQ PE=1 SV=2 - [SFPQ_HUMAN]	1	1	P23246		HCD	1	0	1	1	0.001	0.0142	114	133	1.55	0	55	13	6640000	2	560.765	1120.52	0	2.69	28.42	9431	9431	MS2	0/0	0	0	hala.raw
High	A	2	TVVAPSAVAGK	5337	Selected	NADH dehydrogenase [ubiquinone] 1 beta subcomplex subunit 11, mitochondrial OS=Homo sapiens OX=9606 GN=NDUFB11 PE=1 SV=1 - [NDUBB_HUMAN]	1	1	Q9NX14		HCD	0.0167	0	1	1	0	0.00784	177	186	1.2	0	63	14	5920000	2	500.298	999.589	0	5.47	28.42	9432	9432	MS2	0/0	0	0	hala.raw
Middle	A	2	QALLEAVAGK	5338	Rejected	Trafficking protein particle complex subunit 12 OS=Homo sapiens OX=9606 GN=TRAPPC12 PE=1 SV=3 - [TPC12_HUMAN]	1	0			HCD		0.0167	2	2	0.024	0.273	177	186	1.18	0	63	14	5920000	2	500.298	999.589	0	5.47	28.42	9432	9432	MS2	0/0	0	0	hala.raw
High	A	2	QTYSTEPNNLK	3989	Unambiguous	60S ribosomal protein L28 OS=Homo sapiens OX=9606 GN=RPL28 PE=1 SV=3 - [RL28_HUMAN]	1	1	P46779		HCD	1	0	1	1	0	0.00221	173	181	1.91	0	14	60	8110000	2	647.82	1294.63	0	3.93	28.42	9434	9434	MS2	0/0	0	0	hala.raw
High	A	2	AVTEQGHELSNEER	2348	Unambiguous	14-3-3 protein beta/alpha OS=Homo sapiens OX=9606 GN=YWHAB PE=1 SV=3 - [1433B_HUMAN]	1	1	P31946		HCD	1	0	1	1	0	1.48e-07	115	131	2.71	0	10	60	4040000	2	799.873	1598.74	0	-0.72	28.43	9437	9437	MS2	0/0	0	0	hala.raw
Middle	A	2	LRPESALAQAQK	5345	Unambiguous	Mitochondrial import receptor subunit TOM70 OS=Homo sapiens OX=9606 GN=TOMM70 PE=1 SV=1 - [TOM70_HUMAN]	1	1	O94826		HCD	1	0	1	1	0.013	0.182	110	126	1.77	0	83	60	1430000	2	656.37	1311.73	0	-3.37	28.43	9438	9438	MS2	0/0	0	0	hala.raw
High	A	2	SSFSHYSGLK	5307	Unambiguous	Plasminogen activator inhibitor 1 RNA-binding protein OS=Homo sapiens OX=9606 GN=SERBP1 PE=1 SV=2 - [PAIRB_HUMAN]	1	1	Q8NC51		HCD	1	0	1	1	0.008	0.123	141	129	1.09	0	78	13	5510000	2	556.774	1112.54	0	3.65	28.44	9439	9439	MS2	0/0	0	0	hala.raw
High	A	2	NNASTDYDLSDK	5349	Unambiguous	60S ribosomal protein L3 OS=Homo sapiens OX=9606 GN=RPL3 PE=1 SV=2 - [RL3_HUMAN]	1	1	P39023		HCD	1	0	1	1	0	0.000147	43	38	2.04	0	56	60	7570000	2	671.792	1342.58	0	0.15	28.44	9440	9440	MS2	0/0	0	0	hala.raw
High	A	2	TPGPGAQSALR	3894	Unambiguous	40S ribosomal protein S14 OS=Homo sapiens OX=9606 GN=RPS14 PE=1 SV=3 - [RS14_HUMAN]	1	1	P62263		HCD	1	0	1	1	0	0.000162	134	135	1.85	0	38	7	15500000	2	527.786	1054.56	0	0.32	28.45	9445	9445	MS2	0/0	0	0	hala.raw
High	A	2	APEQEQAAPGPAAGGEAPK	3410	Unambiguous	Brain acid soluble protein 1 OS=Homo sapiens OX=9606 GN=BASP1 PE=1 SV=2 - [BASP1_HUMAN]	1	1	P80723		HCD	1	0	1	1	0	1.42e-06	189	163	3.09	0	24	60	7790000	2	888.431	1775.86	0	-0.54	28.45	9446	9446	MS2	0/0	0	0	hala.raw
High	A	2	NQAPPGLYTK	5363	Unambiguous	Argininosuccinate synthase OS=Homo sapiens OX=9606 GN=ASS1 PE=1 SV=2 - [ASSY_HUMAN]	1	1	P00966		HCD	1	0	1	1	0.002	0.0311	245	241	1.42	0	61	6	15100000	2	544.79	1088.57	0	-1	28.45	9448	9448	MS2	0/0	0	0	hala.raw
High	A	2	LASAAYPDPSK	5365	Unambiguous	Tyrosine--tRNA ligase, cytoplasmic OS=Homo sapiens OX=9606 GN=YARS PE=1 SV=4 - [SYYC_HUMAN]	1	1	P54577		HCD	1	0	1	1	0	0.00159	229	230	1.97	0	42	28	8580000	2	560.288	1119.57	0	1.25	28.45	9449	9449	MS2	0/0	0	0	hala.raw
Middle	A	2	RFPGYDSESK	4071	Unambiguous	60S ribosomal protein L5 OS=Homo sapiens OX=9606 GN=RPL5 PE=1 SV=3 - [RL5_HUMAN]	1	1	P46777		HCD	1	0	1	1	0.014	0.196	93	96	2.22	1	45	17	13500000	2	593.281	1185.55	0	0.82	28.46	9452	9452	MS2	0/0	0	0	hala.raw
Middle	A	2	RPSAPVDFSK	5373	Unambiguous	LRP chaperone MESD OS=Homo sapiens OX=9606 GN=MESD PE=1 SV=2 - [MESD_HUMAN]	1	1	Q14696		HCD	1	0	1	1	0.026	0.3	241	258	1.48	0	58	28	4000000	2	552.296	1103.58	0	-0.04	28.46	9454	9454	MS2	0/0	0	0	hala.raw
High	A	2	AGFAGDDAPR	3795	Unambiguous	Actin, alpha cardiac muscle 1 OS=Homo sapiens OX=9606 GN=ACTC1 PE=1 SV=1 - [ACTC_HUMAN]|Actin, cytoplasmic 1 OS=Homo sapiens OX=9606 GN=ACTB PE=1 SV=1 - [ACTB_HUMAN]	10	2	P68032;P60709		HCD	1	0	1	1	0	0.000139	84	91	1.76	0	10	2	90600000	2	488.728	976.45	0	1.25	28.47	9456	9456	MS2	0/0	0	0	hala.raw
High	A	2	AQAAAPASVPAQAPK	4933	Unambiguous	60S ribosomal protein L29 OS=Homo sapiens OX=9606 GN=RPL29 PE=1 SV=2 - [RL29_HUMAN]	1	1	P47914		HCD	1	0	1	1	0	5.73e-06	196	223	2.47	0	28	57	9960000	2	689.379	1377.75	0	0.89	28.47	9459	9459	MS2	0/0	0	0	hala.raw
High	A	2	LYEQLSGK	5383	Unambiguous	Phosphatidylethanolamine-binding protein 1 OS=Homo sapiens OX=9606 GN=PEBP1 PE=1 SV=3 - [PEBP1_HUMAN]	1	1	P30086		HCD	1	0	1	1	0.001	0.0131	136	130	1.24	0	60	14	9050000	2	469.254	937.5	0	1.43	28.48	9460	9460	MS2	0/0	0	0	hala.raw
High	A	2	LEAALGEAK	5385	Unambiguous	Prelamin-A/C OS=Homo sapiens OX=9606 GN=LMNA PE=1 SV=1 - [LMNA_HUMAN]	1	1	P02545		HCD	1	0	1	1	0.001	0.0129	150	147	1.74	0	61	9	8480000	2	451.254	901.5	0	1.45	28.48	9461	9461	MS2	0/0	0	0	hala.raw
High	A	2	IIAPPER	4510	Unambiguous	Actin, alpha cardiac muscle 1 OS=Homo sapiens OX=9606 GN=ACTC1 PE=1 SV=1 - [ACTC_HUMAN]|Beta-actin-like protein 2 OS=Homo sapiens OX=9606 GN=ACTBL2 PE=1 SV=2 - [ACTBL_HUMAN]|Actin, cytoplasmic 1 OS=Homo sapiens OX=9606 GN=ACTB PE=1 SV=1 - [ACTB_HUMAN]	7	3	P68032;Q562R1;P60709		HCD	1	0	1	1	0.008	0.111	61	60	1.6	0	5	5	51400000	2	398.24	795.472	0	-0.11	28.48	9463	9463	MS2	0/0	0	0	hala.raw
High	A	2	DSYVGDEAQSK	2007	Unambiguous	Actin, alpha cardiac muscle 1 OS=Homo sapiens OX=9606 GN=ACTC1 PE=1 SV=1 - [ACTC_HUMAN]|Actin, cytoplasmic 1 OS=Homo sapiens OX=9606 GN=ACTB PE=1 SV=1 - [ACTB_HUMAN]	6	2	P68032;P60709		HCD	1	0	1	1	0	0.00145	57	54	1.72	0	17	6	46400000	2	599.765	1198.52	0	-0.12	28.48	9464	9464	MS2	0/0	0	0	hala.raw
High	A	2	VIDDTNITR	5391	Unambiguous	Keratin, type I cytoskeletal 18 OS=Homo sapiens OX=9606 GN=KRT18 PE=1 SV=2 - [K1C18_HUMAN]	1	1	P05783		HCD	1	0	1	1	0	0.0032	259	235	1.39	0	60	4	35900000	2	523.778	1046.55	0	1.46	28.49	9466	9466	MS2	0/0	0	0	hala.raw
High	A	2	QAEILQESR	5393	Unambiguous	Tubulin-specific chaperone A OS=Homo sapiens OX=9606 GN=TBCA PE=1 SV=3 - [TBCA_HUMAN]	1	1	O75347		HCD	1	0	1	1	0	0.00129	212	217	2.29	0	45	7	7500000	2	537.281	1073.55	0	-3.84	28.49	9467	9467	MS2	0/0	0	0	hala.raw
High	A	2	DLEADEEDTR	4043	Unambiguous	Eukaryotic translation initiation factor 2 subunit 2 OS=Homo sapiens OX=9606 GN=EIF2S2 PE=1 SV=2 - [IF2B_HUMAN]	1	1	P20042		HCD	1	0	1	1	0.001	0.0109	19	26	1.71	0	77	60	1750000	2	596.751	1192.49	0	-1.62	28.49	9468	9468	MS2	0/0	0	0	hala.raw
High	A	2	VDNDENEHQLSLR	5397	Unambiguous	Nucleophosmin OS=Homo sapiens OX=9606 GN=NPM1 PE=1 SV=2 - [NPM_HUMAN]	1	1	P06748		HCD	1	0	1	1	0	1.41e-06	158	130	3.05	0	39	58	9750000	2	784.871	1568.73	0	2.97	28.5	9469	9469	MS2	0/0	0	0	hala.raw
High	A	2	EDMAALEK	5401	Unambiguous	Tubulin alpha-1A chain OS=Homo sapiens OX=9606 GN=TUBA1A PE=1 SV=1 - [TBA1A_HUMAN]|Tubulin alpha-1B chain OS=Homo sapiens OX=9606 GN=TUBA1B PE=1 SV=1 - [TBA1B_HUMAN]|Tubulin alpha-1C chain OS=Homo sapiens OX=9606 GN=TUBA1C PE=1 SV=1 - [TBA1C_HUMAN]|Tubulin alpha-4A chain OS=Homo sapiens OX=9606 GN=TUBA4A PE=1 SV=1 - [TBA4A_HUMAN]	4	2	Q9BQE3;P68366		HCD	1	0	1	1	0.006	0.0879	145	130	1.27	0	67	10	6020000	2	453.717	906.428	0	4.16	28.5	9471	9471	MS2	0/0	0	0	hala.raw
High	A	2	MPSGEFAR	5403	Unambiguous	Proliferating cell nuclear antigen OS=Homo sapiens OX=9606 GN=PCNA PE=1 SV=1 - [PCNA_HUMAN]	1	1	P12004		HCD	1	0	1	1	0	0.00949	106	85	2	0	41	28	7150000	2	447.71	894.412	0	-1.58	28.5	9472	9472	MS2	0/0	0	0	hala.raw
High	A	2	SSGSPYGGGYGSGGGSGGYGSR	4915	Unambiguous	Heterogeneous nuclear ribonucleoprotein A3 OS=Homo sapiens OX=9606 GN=HNRNPA3 PE=1 SV=2 - [ROA3_HUMAN]	1	1	P51991		HCD	1	0	1	1	0	0.000177	25	29	1.42	0	0	60	1360000	2	955.899	1910.79	0	0.34	28.5	9473	9473	MS2	0/0	0	0	hala.raw
High	A	2	YTcSFcGK	3898	Unambiguous	60S ribosomal protein L37a OS=Homo sapiens OX=9606 GN=RPL37A PE=1 SV=2 - [RL37A_HUMAN]	2	1	P61513	C3(Carbamidomethyl); C6(Carbamidomethyl)	HCD	1	0	1	1	0.002	0.025	14	8	1.13	0	47	60	3810000	2	511.707	1022.41	0	-0.43	28.51	9476	9476	MS2	0/0	0	0	hala.raw
Middle	A	2	QHYIDLK	5410	Unambiguous	Nucleoside diphosphate kinase B OS=Homo sapiens OX=9606 GN=NME2 PE=1 SV=1 - [NDKB_HUMAN]	2	1	P22392		HCD	1	0	1	2	0.028	0.318	236	242	1.26	0	55	4	21300000	2	458.748	916.488	0	-0.48	28.51	9477	9477	MS2	0/0	0	0	hala.raw
High	A	2	HSGPNSADSANDGFVR	3868	Unambiguous	Heterogeneous nuclear ribonucleoprotein F OS=Homo sapiens OX=9606 GN=HNRNPF PE=1 SV=3 - [HNRPF_HUMAN]	1	1	P52597		HCD	1	0	1	1	0.001	0.0109	55	60	1.39	0	42	60	2010000	2	815.863	1630.72	0	-0.68	28.51	9478	9478	MS2	0/0	0	0	hala.raw
High	A	2	DGMDNQGGYGSVGR	5413	Unambiguous	Heterogeneous nuclear ribonucleoprotein H3 OS=Homo sapiens OX=9606 GN=HNRNPH3 PE=1 SV=2 - [HNRH3_HUMAN]	1	1	P31942		HCD	1	0	1	1	0	7.66e-05	24	23	2.22	0	66	60	5110000	2	706.796	1412.58	0	-1.21	28.51	9479	9479	MS2	0/0	0	0	hala.raw
High	A	2	INISEGNcPER	5425	Unambiguous	Poly(rC)-binding protein 1 OS=Homo sapiens OX=9606 GN=PCBP1 PE=1 SV=2 - [PCBP1_HUMAN]|Poly(rC)-binding protein 2 OS=Homo sapiens OX=9606 GN=PCBP2 PE=1 SV=1 - [PCBP2_HUMAN]	3	2	Q15365;Q15366	C8(Carbamidomethyl)	HCD	1	0	1	1	0	1.14e-05	96	88	2.61	0	19	44	14200000	2	644.801	1288.59	0	-0.81	28.53	9486	9486	MS2	0/0	0	0	hala.raw
High	A	2	IGQQPQQPGAPPQQDYTK	5431	Unambiguous	Far upstream element-binding protein 2 OS=Homo sapiens OX=9606 GN=KHSRP PE=1 SV=4 - [FUBP2_HUMAN]	1	1	Q92945		HCD	1	0	1	1	0.005	0.0653	182	188	1.31	0	0	60	944000	2	990.99	1980.97	0	-2.21	28.54	9490	9490	MS2	0/0	0	0	hala.raw
Middle	A	2	MVTGDNINTAR	5433	Unambiguous	Plasma membrane calcium-transporting ATPase 1 OS=Homo sapiens OX=9606 GN=ATP2B1 PE=1 SV=4 - [AT2B1_HUMAN]	4	1	P20020		HCD	1	0	1	1	0.046	0.448	151	160	1.57	0	69	60	2500000	2	596.288	1191.57	-0.01	-9.16	28.54	9491	9491	MS2	0/0	0	0	hala.raw
High	A	2	QAASGLVGQENAR	4939	Unambiguous	RuvB-like 1 OS=Homo sapiens OX=9606 GN=RUVBL1 PE=1 SV=1 - [RUVB1_HUMAN]	1	1	Q9Y265		HCD	1	0	1	1	0	0.000454	144	155	2.32	0	45	60	2420000	2	650.828	1300.65	-0.01	-9.03	28.54	9493	9493	MS2	0/0	0	0	hala.raw
High	A	2	ALEENNNFSK	3443	Unambiguous	Stathmin OS=Homo sapiens OX=9606 GN=STMN1 PE=1 SV=3 - [STMN1_HUMAN]	2	1	P16949		HCD	1	0	1	1	0.001	0.0173	120	141	1.47	0	58	60	6270000	2	583.275	1165.54	0	-4.24	28.55	9496	9496	MS2	0/0	0	0	hala.raw
High	A	2	AIEENNNFSK	3443	Unambiguous	Stathmin OS=Homo sapiens OX=9606 GN=STMN1 PE=1 SV=3 - [STMN1_HUMAN]	2	1	P16949		HCD	1	0	1	2	0.001	0.0173	120	141	1.47	0	58	60	6270000	2	583.275	1165.54	0	-4.24	28.55	9496	9496	MS2	0/0	0	0	hala.raw
High	A	2	VDNDENEHQLSLR	5397	Unambiguous	Nucleophosmin OS=Homo sapiens OX=9606 GN=NPM1 PE=1 SV=2 - [NPM_HUMAN]	1	1	P06748		HCD	1	0	1	1	0	8.09e-05	140	112	2.33	0	41	6	60600000	3	523.581	1568.73	0	-0.3	28.55	9497	9497	MS2	0/0	0	0	hala.raw
High	A	2	LcTSATESEVAR	4431	Unambiguous	Cytochrome b-c1 complex subunit 1, mitochondrial OS=Homo sapiens OX=9606 GN=UQCRC1 PE=1 SV=3 - [QCR1_HUMAN]	1	1	P31930	C2(Carbamidomethyl)	HCD	1	0	1	1	0	0.00328	123	129	1.65	0	45	60	1930000	2	662.315	1323.62	0	0.87	28.55	9499	9499	MS2	0/0	0	0	hala.raw
High	A	2	LEcVEPNcR	3801	Unambiguous	60S ribosomal protein L36a OS=Homo sapiens OX=9606 GN=RPL36A PE=1 SV=2 - [RL36A_HUMAN]	2	1	P83881	C3(Carbamidomethyl); C8(Carbamidomethyl)	HCD	1	0	1	1	0.002	0.0227	46	46	1.49	0	58	11	9120000	2	588.76	1176.51	0	-0.26	28.56	9500	9500	MS2	0/0	0	0	hala.raw
High	A	2	AIEENNNFSK	3443	Unambiguous	Stathmin OS=Homo sapiens OX=9606 GN=STMN1 PE=1 SV=3 - [STMN1_HUMAN]	2	1	P16949		HCD	1	0	1	1	0	0.00701	120	141	1.72	0	58	60	6270000	2	583.275	1165.54	0	-4.24	28.56	9501	9501	MS2	0/0	0	0	hala.raw
High	A	2	ALEENNNFSK	3443	Unambiguous	Stathmin OS=Homo sapiens OX=9606 GN=STMN1 PE=1 SV=3 - [STMN1_HUMAN]	2	1	P16949		HCD	1	0	1	2	0	0.00701	120	141	1.72	0	58	60	6270000	2	583.275	1165.54	0	-4.24	28.56	9501	9501	MS2	0/0	0	0	hala.raw
High	A	2	ETMQSLNDR	1322	Unambiguous	Keratin, type I cytoskeletal 18 OS=Homo sapiens OX=9606 GN=KRT18 PE=1 SV=2 - [K1C18_HUMAN]	2	1	P05783		HCD	1	0	1	1	0	0.00343	77	64	1.85	0	31	15	14800000	2	547.25	1093.49	0	-1.78	28.56	9503	9503	MS2	0/0	0	0	hala.raw
High	A	2	YLAEVAcGDDRK	4620	Unambiguous	14-3-3 protein theta OS=Homo sapiens OX=9606 GN=YWHAQ PE=1 SV=1 - [1433T_HUMAN]	1	1	P27348	C7(Carbamidomethyl)	HCD	1	0	1	1	0	0.00791	127	129	1.98	1	64	60	3900000	2	698.829	1396.65	0	-0.68	28.57	9504	9504	MS2	0/0	0	0	hala.raw
High	A	2	AAEAAAAPAESAAPAAGEEPSK	5029	Unambiguous	Brain acid soluble protein 1 OS=Homo sapiens OX=9606 GN=BASP1 PE=1 SV=2 - [BASP1_HUMAN]	1	1	P80723		HCD	1	0	1	1	0	2.91e-06	139	147	3.09	0	0	60	2350000	2	983.97	1966.93	0	-1.38	28.57	9506	9506	MS2	0/0	0	0	hala.raw
High	A	2	EIFDSR	5463	Unambiguous	Alpha-enolase OS=Homo sapiens OX=9606 GN=ENO1 PE=1 SV=2 - [ENOA_HUMAN]	1	1	P06733		HCD	1	0	1	1	0.005	0.0685	96	120	1.42	0	34	21	6670000	2	383.69	766.373	0	-0.16	28.58	9509	9509	MS2	0/0	0	0	hala.raw
High	A	2	YRPGTVALR	4616	Unambiguous	Histone H3.1 OS=Homo sapiens OX=9606 GN=HIST1H3A PE=1 SV=2 - [H31_HUMAN]	5	1	P68431		HCD	1	0	1	1	0.001	0.0172	133	133	1.69	0	12	2	116000000	2	516.801	1032.59	0	-0.51	28.59	9517	9517	MS2	0/0	0	0	hala.raw
High	A	2	MDSTEPPYSQK	3613	Unambiguous	Elongation factor 1-alpha 1 OS=Homo sapiens OX=9606 GN=EEF1A1 PE=1 SV=1 - [EF1A1_HUMAN]	2	1	P68104		HCD	1	0	1	1	0	0.00599	60	51	1.77	0	28	60	6970000	2	641.783	1282.56	0	-2.18	28.6	9519	9519	MS2	0/0	0	0	hala.raw
High	A	2	AVTEQGHELSNEER	2348	Unambiguous	14-3-3 protein beta/alpha OS=Homo sapiens OX=9606 GN=YWHAB PE=1 SV=3 - [1433B_HUMAN]	1	1	P31946		HCD	1	0	1	1	0	0.00014	117	133	1.74	0	86	17	5740000	3	533.585	1598.74	0	-0.61	28.6	9522	9522	MS2	0/0	0	0	hala.raw
Middle	A	2	ADTQTYQPYNK	3664	Unambiguous	Enhancer of rudimentary homolog OS=Homo sapiens OX=9606 GN=ERH PE=1 SV=1 - [ERH_HUMAN]	1	1	P84090		HCD	1	0	1	1	0.025	0.288	71	74	1.25	0	22	60	2660000	2	664.808	1328.61	0	-2.11	28.6	9523	9523	MS2	0/0	0	0	hala.raw
High	A	2	SNVSDAVAQSTR	4643	Unambiguous	Triosephosphate isomerase OS=Homo sapiens OX=9606 GN=TPI1 PE=1 SV=3 - [TPIS_HUMAN]	1	1	P60174		HCD	1	0	1	1	0	3.65e-05	170	175	2.23	0	50	9	23300000	2	617.803	1234.6	0	-2.81	28.61	9525	9525	MS2	0/0	0	0	hala.raw
Middle	A	2	LNFSHGTHEYHAETIK	5031	Unambiguous	Pyruvate kinase PKM OS=Homo sapiens OX=9606 GN=PKM PE=1 SV=4 - [KPYM_HUMAN]	1	1	P14618		HCD	1	0	1	1	0.02	0.238	165	179	0.87	0	16	60	1370000	2	942.458	1883.91	0	2.83	28.61	9528	9528	MS2	0/0	0	0	hala.raw
High	A	2	AQYDELAR	5505	Unambiguous	Keratin, type I cytoskeletal 18 OS=Homo sapiens OX=9606 GN=KRT18 PE=1 SV=2 - [K1C18_HUMAN]	1	1	P05783		HCD	1	0	1	1	0	0.00756	166	166	1.75	0	10	6	33400000	2	483.238	965.469	0	0.27	28.62	9532	9532	MS2	0/0	0	0	hala.raw
High	A	2	KPDTIEVQQMK	5510	Unambiguous	Ezrin OS=Homo sapiens OX=9606 GN=EZR PE=1 SV=4 - [EZRI_HUMAN]|Moesin OS=Homo sapiens OX=9606 GN=MSN PE=1 SV=3 - [MOES_HUMAN]|Radixin OS=Homo sapiens OX=9606 GN=RDX PE=1 SV=1 - [RADI_HUMAN]	3	3	P15311;P26038;P35241		HCD	1	0	1	1	0	0.00716	262	263	2.16	0	49	60	3440000	2	658.843	1316.68	0	-6.6	28.63	9534	9534	MS2	0/0	0	0	hala.raw
High	A	2	NFSDNQLQEGK	5512	Unambiguous	Transgelin-2 OS=Homo sapiens OX=9606 GN=TAGLN2 PE=1 SV=3 - [TAGL2_HUMAN]	1	1	P37802		HCD	1	0	1	1	0	0.000686	104	104	1.81	0	41	56	9110000	2	640.298	1279.59	0	-1.44	28.63	9535	9535	MS2	0/0	0	0	hala.raw
High	A	2	YESLTDPSK	4512	Unambiguous	Heat shock protein HSP 90-beta OS=Homo sapiens OX=9606 GN=HSP90AB1 PE=1 SV=4 - [HS90B_HUMAN]|Heat shock protein HSP 90-alpha OS=Homo sapiens OX=9606 GN=HSP90AA1 PE=1 SV=5 - [HS90A_HUMAN]|Putative heat shock protein HSP 90-beta 4 OS=Homo sapiens OX=9606 GN=HSP90AB4P PE=5 SV=1 - [H90B4_HUMAN]	5	2	P08238;P07900		HCD	1	0	1	1	0	0.00406	115	118	1.66	0	39	18	10200000	2	520.248	1039.49	0	-4.77	28.64	9542	9542	MS2	0/0	0	0	hala.raw
High	A	2	SVTEQGAELSNEER	5101	Unambiguous	14-3-3 protein zeta/delta OS=Homo sapiens OX=9606 GN=YWHAZ PE=1 SV=1 - [1433Z_HUMAN]	1	1	P63104		HCD	1	0	1	1	0	1.85e-07	110	93	3.11	0	31	56	9840000	2	774.859	1548.71	0	-1.43	28.65	9545	9545	MS2	0/0	0	0	hala.raw
High	A	2	GPPQEEEEEEDEEEEATK	5113	Unambiguous	Hepatoma-derived growth factor OS=Homo sapiens OX=9606 GN=HDGF PE=1 SV=1 - [HDGF_HUMAN]	1	1	P51858		HCD	1	0	1	1	0.001	0.0182		4	1.2	0	29	60	1390000	2	1052.42	2103.83	0	-4.26	28.65	9547	9547	MS2	0/0	0	0	hala.raw
High	A	2	LITEDVQGK	5535	Unambiguous	40S ribosomal protein S3a OS=Homo sapiens OX=9606 GN=RPS3A PE=1 SV=2 - [RS3A_HUMAN]	1	1	P61247		HCD	1	0	1	2	0	0.00236	249	224	1.51	0	46	10	9530000	2	501.776	1002.55	0	-0.95	28.65	9548	9548	MS2	0/0	0	0	hala.raw
High	A	2	GDDLQAIK	5536	Unambiguous	Heterogeneous nuclear ribonucleoproteins C1/C2 OS=Homo sapiens OX=9606 GN=HNRNPC PE=1 SV=4 - [HNRPC_HUMAN]	4	1	P07910		HCD	1	0	1	1	0.004	0.0527	136	139	1.66	0	39	19	9030000	2	430.23	859.452	0	-0.29	28.66	9549	9549	MS2	0/0	0	0	hala.raw
High	A	2	QLQQAQAAGAEQEVEK	5540	Unambiguous	Flap endonuclease 1 OS=Homo sapiens OX=9606 GN=FEN1 PE=1 SV=1 - [FEN1_HUMAN]	1	1	P39748		HCD	1	0	1	1	0	0.000844	180	182	2.26	0	0	60	2030000	2	864.431	1727.85	0	-0.6	28.66	9551	9551	MS2	0/0	0	0	hala.raw
Middle	A	2	FIYTR	5081	Unambiguous	Heterogeneous nuclear ribonucleoprotein H2 OS=Homo sapiens OX=9606 GN=HNRNPH2 PE=1 SV=1 - [HNRH2_HUMAN]|Heterogeneous nuclear ribonucleoprotein H OS=Homo sapiens OX=9606 GN=HNRNPH1 PE=1 SV=4 - [HNRH1_HUMAN]	2	2	P55795;P31943		HCD	1	0	1	1	0.035	0.372	115	110	1.03	0	21	60	770000	2	350.195	699.383	0	0.5	28.67	9559	9559	MS2	0/0	0	0	hala.raw
High	A	2	YLSEVASGDNK	4380	Unambiguous	14-3-3 protein beta/alpha OS=Homo sapiens OX=9606 GN=YWHAB PE=1 SV=3 - [1433B_HUMAN]	1	1	P31946		HCD	1	0	1	1	0.009	0.131	121	123	1.67	0	47	24	11900000	2	591.78	1182.55	-0.01	-9.07	28.67	9560	9560	MS2	0/0	0	0	hala.raw
Middle	A	2	MYSYPAR	4568	Unambiguous	Heterogeneous nuclear ribonucleoproteins C1/C2 OS=Homo sapiens OX=9606 GN=HNRNPC PE=1 SV=4 - [HNRPC_HUMAN]	1	1	P07910		HCD	1	0	1	1	0.02	0.239	65	64	0.83	0	59	8	9920000	2	444.208	887.408	0	0.05	28.68	9561	9561	MS2	0/0	0	0	hala.raw
High	A	2	TVLcGTcGQPADK	5091	Unambiguous	Prelamin-A/C OS=Homo sapiens OX=9606 GN=LMNA PE=1 SV=1 - [LMNA_HUMAN]	1	1	P02545	C4(Carbamidomethyl); C7(Carbamidomethyl)	HCD	1	0	1	1	0	0.000472	99	87	2.1	0	15	60	3540000	2	703.823	1406.64	0	-0.54	28.69	9566	9566	MS2	0/0	0	0	hala.raw
High	A	2	NADGTIcYDSTHYK	5572	Unambiguous	Alcohol dehydrogenase [NADP(+)] OS=Homo sapiens OX=9606 GN=AKR1A1 PE=1 SV=3 - [AK1A1_HUMAN]	1	1	P14550	C7(Carbamidomethyl)	HCD	1	0	1	1	0	0.00281	23	23	1.93	0	69	60	1380000	2	822.85	1644.69	0	-1.51	28.7	9570	9570	MS2	0/0	0	0	hala.raw
High	A	2	ISSSSFSR	3579	Unambiguous	Keratin, type II cytoskeletal 8 OS=Homo sapiens OX=9606 GN=KRT8 PE=1 SV=7 - [K2C8_HUMAN]	1	1	P05787		HCD	1	0	1	1	0	0.00621	104	116	1.66	0	39	15	11000000	2	435.719	870.431	0	-0.67	28.7	9572	9572	MS2	0/0	0	0	hala.raw
High	A	2	FSELTAEK	5579	Unambiguous	T-complex protein 1 subunit epsilon OS=Homo sapiens OX=9606 GN=CCT5 PE=1 SV=1 - [TCPE_HUMAN]	1	1	P48643		HCD	1	0	1	2	0.003	0.0446	127	117	0.84	0	62	9	9530000	2	462.737	924.467	0	0.07	28.7	9573	9573	MS2	0/0	0	0	hala.raw
High	A	2	GVDLQENNPASR	5580	Unambiguous	Ras-related protein Rab-5C OS=Homo sapiens OX=9606 GN=RAB5C PE=1 SV=2 - [RAB5C_HUMAN]	1	1	P51148		HCD	1	0	1	1	0	0.000542	115	119	1.96	0	0	60	4620000	2	650.316	1299.62	0	-3.1	28.7	9574	9574	MS2	0/0	0	0	hala.raw
Middle	A	2	VFDVTK	5582	Unambiguous	Membrane-associated progesterone receptor component 1 OS=Homo sapiens OX=9606 GN=PGRMC1 PE=1 SV=3 - [PGRC1_HUMAN]	2	1	O00264		HCD	1	0	1	1	0.038	0.392	80	81	1.11	0	42	60	767000	2	354.7	708.392	0	-0.8	28.71	9575	9575	MS2	0/0	0	0	hala.raw
High	A	2	LLADQAEAR	5158	Unambiguous	60S ribosomal protein L19 OS=Homo sapiens OX=9606 GN=RPL19 PE=1 SV=1 - [RL19_HUMAN]	1	1	P84098		HCD	1	0	1	1	0	0.000828	143	160	1.55	0	49	8	12600000	2	493.767	986.526	0	-0.55	28.71	9577	9577	MS2	0/0	0	0	hala.raw
High	A	2	LSVDYGK	5156	Unambiguous	Tubulin alpha-1A chain OS=Homo sapiens OX=9606 GN=TUBA1A PE=1 SV=1 - [TBA1A_HUMAN]|Tubulin alpha-1B chain OS=Homo sapiens OX=9606 GN=TUBA1B PE=1 SV=1 - [TBA1B_HUMAN]|Tubulin alpha-1C chain OS=Homo sapiens OX=9606 GN=TUBA1C PE=1 SV=1 - [TBA1C_HUMAN]|Tubulin alpha-4A chain OS=Homo sapiens OX=9606 GN=TUBA4A PE=1 SV=1 - [TBA4A_HUMAN]	5	2	Q9BQE3;P68366		HCD	1	0	1	1	0.002	0.0286	132	140	1.56	0	36	17	9110000	2	391.208	781.409	0	-0.66	28.71	9578	9578	MS2	0/0	0	0	hala.raw
High	A	2	LQSIGTENTEENR	4724	Unambiguous	Fructose-bisphosphate aldolase A OS=Homo sapiens OX=9606 GN=ALDOA PE=1 SV=2 - [ALDOA_HUMAN]	1	1	P04075		HCD	1	0	1	1	0	8.23e-07	142	130	3.02	0	31	47	14100000	2	745.857	1490.71	0	-0.67	28.73	9585	9585	MS2	0/0	0	0	hala.raw
High	A	2	RAGELTEDEVER	3912	Unambiguous	40S ribosomal protein S18 OS=Homo sapiens OX=9606 GN=RPS18 PE=1 SV=3 - [RS18_HUMAN]	1	1	P62269		HCD	1	0	1	1	0	2.48e-05	156	149	2.41	1	20	60	5750000	2	702.343	1403.68	0	1.48	28.73	9588	9588	MS2	0/0	0	0	hala.raw
High	A	2	AFDQIR	5166	Unambiguous	Transketolase OS=Homo sapiens OX=9606 GN=TKT PE=1 SV=3 - [TKT_HUMAN]	2	1	P29401		HCD	1	0	1	1	0.008	0.123	179	194	1.36	0	58	60	1890000	2	375.201	749.394	0	0.31	28.74	9589	9589	MS2	0/0	0	0	hala.raw
High	A	2	AFDQLR	5166	Unambiguous	Transketolase OS=Homo sapiens OX=9606 GN=TKT PE=1 SV=3 - [TKT_HUMAN]	2	1	P29401		HCD	1	0	1	2	0.008	0.123	179	194	1.36	0	58	60	1890000	2	375.201	749.394	0	0.31	28.74	9589	9589	MS2	0/0	0	0	hala.raw
High	A	2	GVEEEEEDGEMRE	4730	Unambiguous	Small nuclear ribonucleoprotein F OS=Homo sapiens OX=9606 GN=SNRPF PE=1 SV=1 - [RUXF_HUMAN]	1	1	P62306		HCD	1	0	1	1	0	0.00505	6	5	1.81	1	22	60	3240000	2	769.301	1537.59	0	-1.25	28.74	9590	9590	MS2	0/0	0	0	hala.raw
High	A	2	GPAYGLSR	4309	Unambiguous	Transgelin-2 OS=Homo sapiens OX=9606 GN=TAGLN2 PE=1 SV=3 - [TAGL2_HUMAN]	1	1	P37802		HCD	1	0	1	1	0.001	0.0205	248	249	1.77	0	23	36	5850000	2	410.719	820.431	0	-0.83	28.75	9593	9593	MS2	0/0	0	0	hala.raw
High	A	2	DVDEAYMNK	5136	Unambiguous	Keratin, type II cytoskeletal 8 OS=Homo sapiens OX=9606 GN=KRT8 PE=1 SV=7 - [K2C8_HUMAN]	1	1	P05787		HCD	1	0	1	1	0	0.00648	41	37	1.47	0	42	28	12300000	2	542.734	1084.46	0	-0.46	28.75	9594	9594	MS2	0/0	0	0	hala.raw
High	A	2	FLEEATR	5617	Unambiguous	Carbamoyl-phosphate synthase [ammonia], mitochondrial OS=Homo sapiens OX=9606 GN=CPS1 PE=1 SV=2 - [CPSM_HUMAN]	1	1	P31327		HCD	1	0	1	1	0.002	0.0292	190	189	1.61	0	21	18	11100000	2	433.224	865.441	0	-0.42	28.75	9595	9595	MS2	0/0	0	0	hala.raw
High	A	2	VSASLPR	5621	Unambiguous	LIM domain only protein 7 OS=Homo sapiens OX=9606 GN=LMO7 PE=1 SV=3 - [LMO7_HUMAN]	1	1	Q8WWI1		HCD	1	0	1	1	0.004	0.05	208	196	1.19	0	64	60	867000	2	365.217	729.427	0	1.84	28.75	9597	9597	MS2	0/0	0	0	hala.raw
High	A	2	LVAGEMGQNEPDQGGQR	2680	Unambiguous	3-hydroxyacyl-CoA dehydrogenase type-2 OS=Homo sapiens OX=9606 GN=HSD17B10 PE=1 SV=3 - [HCD2_HUMAN]	1	1	Q99714		HCD	1	0	1	1	0	6.7e-08	95	107	2.72	0	0	60	8560000	2	893.412	1785.82	0	-0.62	28.77	9600	9600	MS2	0/0	0	0	hala.raw
High	A	2	SNYNLPMHK	5625	Unambiguous	60S ribosomal protein L4 OS=Homo sapiens OX=9606 GN=RPL4 PE=1 SV=5 - [RL4_HUMAN]	1	1	P36578		HCD	1	0	1	1	0.003	0.037	126	128	1.53	0	27	60	2170000	3	368.515	1103.53	0	-0.55	28.77	9601	9601	MS2	0/0	0	0	hala.raw
High	A	2	EVVQNFAK	5627	Unambiguous	Coactosin-like protein OS=Homo sapiens OX=9606 GN=COTL1 PE=1 SV=3 - [COTL1_HUMAN]	1	1	Q14019		HCD	1	0	1	1	0.002	0.0271	191	213	1.77	0	36	20	7960000	2	467.753	934.499	0	-0.44	28.77	9602	9602	MS2	0/0	0	0	hala.raw
High	A	2	EAMEDGEIDGNK	4013	Unambiguous	Nucleolin OS=Homo sapiens OX=9606 GN=NCL PE=1 SV=3 - [NUCL_HUMAN]	1	1	P19338		HCD	1	0	1	1	0	0.000114	28	23	2.8	0	39	60	8660000	2	654.274	1307.54	0	-1.52	28.77	9603	9603	MS2	0/0	0	0	hala.raw
High	A	2	HTGPNSPDTANDGFVR	5021	Unambiguous	Heterogeneous nuclear ribonucleoprotein H2 OS=Homo sapiens OX=9606 GN=HNRNPH2 PE=1 SV=1 - [HNRH2_HUMAN]|Heterogeneous nuclear ribonucleoprotein H OS=Homo sapiens OX=9606 GN=HNRNPH1 PE=1 SV=4 - [HNRH1_HUMAN]	2	2	P55795;P31943		HCD	1	0	1	1	0	1.7e-05	94	88	3.33	0	16	60	3630000	3	562.259	1684.76	0	-2.7	28.77	9604	9604	MS2	0/0	0	0	hala.raw
High	A	2	AAPGAEFAPNK	5636	Unambiguous	Non-POU domain-containing octamer-binding protein OS=Homo sapiens OX=9606 GN=NONO PE=1 SV=4 - [NONO_HUMAN]	1	1	Q15233		HCD	1	0	1	1	0	0.00307	155	148	1.5	0	78	23	5000000	2	536.773	1072.54	0	-2.7	28.77	9606	9606	MS2	0/0	0	0	hala.raw
High	A	2	QAASSLQQASLK	5646	Unambiguous	Stress-70 protein, mitochondrial OS=Homo sapiens OX=9606 GN=HSPA9 PE=1 SV=2 - [GRP75_HUMAN]	1	1	P38646		HCD	1	0	1	1	0	6.49e-06	244	237	2.84	0	35	15	23300000	2	616.336	1231.66	0	-0.03	28.79	9613	9613	MS2	0/0	0	0	hala.raw
Middle	A	2	ISSDLDGHPVPK	5217	Unambiguous	Transketolase OS=Homo sapiens OX=9606 GN=TKT PE=1 SV=3 - [TKT_HUMAN]	1	1	P29401		HCD	1	0	1	1	0.043	0.427	225	218	1.36	0	58	15	9790000	3	422.223	1264.65	0	0.27	28.79	9614	9614	MS2	0/0	0	0	hala.raw
High	A	2	EKPTTALLDK	5650	Unambiguous	Interleukin enhancer-binding factor 3 OS=Homo sapiens OX=9606 GN=ILF3 PE=1 SV=3 - [ILF3_HUMAN]	1	1	Q12906		HCD	1	0	1	1	0.001	0.0178	161	166	1.67	0	67	14	5910000	2	558.318	1115.63	0	-1.15	28.79	9615	9615	MS2	0/0	0	0	hala.raw
High	A	2	ISGTVNIR	5652	Unambiguous	Threonine--tRNA ligase, cytoplasmic OS=Homo sapiens OX=9606 GN=TARS PE=1 SV=3 - [SYTC_HUMAN]	1	1	P26639		HCD	1	0	1	1	0	0.00982	253	238	2.33	0	64	32	4830000	2	430.253	859.499	0	-0.51	28.79	9616	9616	MS2	0/0	0	0	hala.raw
High	A	2	DGEEAGAYDGPR	3857	Unambiguous	Protein disulfide-isomerase A3 OS=Homo sapiens OX=9606 GN=PDIA3 PE=1 SV=4 - [PDIA3_HUMAN]	1	1	P30101		HCD	1	0	1	1	0	0.000178	27	18	2.41	0	81	25	3800000	2	618.761	1236.51	0	1.33	28.79	9617	9617	MS2	0/0	0	0	hala.raw
High	A	2	HVGDLGNVTADK	4788	Unambiguous	Superoxide dismutase [Cu-Zn] OS=Homo sapiens OX=9606 GN=SOD1 PE=1 SV=2 - [SODC_HUMAN]	1	1	P00441		HCD	1	0	1	1	0	3.79e-05	158	164	2.68	0	52	60	8400000	2	613.312	1225.62	0	-0.47	28.8	9619	9619	MS2	0/0	0	0	hala.raw
High	A	2	EALLQASR	5663	Unambiguous	Moesin OS=Homo sapiens OX=9606 GN=MSN PE=1 SV=3 - [MOES_HUMAN]	1	1	P26038		HCD	1	0	1	1	0.003	0.0456	248	237	1.36	0	68	8	10000000	2	444.25	887.493	0	-1.37	28.8	9622	9622	MS2	0/0	0	0	hala.raw
High	A	2	HFVALSTNTTK	5665	Unambiguous	Glucose-6-phosphate isomerase OS=Homo sapiens OX=9606 GN=GPI PE=1 SV=4 - [G6PI_HUMAN]	1	1	P06744		HCD	1	0	1	1	0	5.82e-06	207	217	3.04	0	46	60	5910000	2	609.827	1218.65	0	-1.1	28.81	9623	9623	MS2	0/0	0	0	hala.raw
High	A	2	AQYEDIANR	4800	Unambiguous	Keratin, type II cytoskeletal 8 OS=Homo sapiens OX=9606 GN=KRT8 PE=1 SV=7 - [K2C8_HUMAN]	2	1	P05787		HCD	1	0	1	1	0	0.00654	128	115	1.49	0	53	6	22300000	2	540.259	1079.51	0	-0.57	28.81	9626	9626	MS2	0/0	0	0	hala.raw
High	A	2	SEEAHAEDSVMDHHFR	5675	Unambiguous	Plasminogen activator inhibitor 1 RNA-binding protein OS=Homo sapiens OX=9606 GN=SERBP1 PE=1 SV=2 - [PAIRB_HUMAN]	1	1	Q8NC51		HCD	1	0	1	1	0	2.98e-09	25	29	3.99	0	41	60	6420000	3	632.935	1896.79	0	-0.98	28.82	9630	9630	MS2	0/0	0	0	hala.raw
High	A	2	ETPAATEAPSSTPK	2813	Unambiguous	Brain acid soluble protein 1 OS=Homo sapiens OX=9606 GN=BASP1 PE=1 SV=2 - [BASP1_HUMAN]	1	1	P80723		HCD	1	0	1	1	0	2.17e-06	152	145	2.81	0	15	60	6240000	2	693.842	1386.68	0	1.11	28.82	9631	9631	MS2	0/0	0	0	hala.raw
High	A	2	QcVPFR	5679	Unambiguous	60S ribosomal protein L17 OS=Homo sapiens OX=9606 GN=RPL17 PE=1 SV=3 - [RL17_HUMAN]	1	1	P18621	C2(Carbamidomethyl)	HCD	1	0	1	1	0.006	0.091	125	115	1.53	0	30	7	18100000	2	403.703	806.398	0	0.16	28.83	9632	9632	MS2	0/0	0	0	hala.raw
High	A	2	LVSSDPEINTK	5681	Unambiguous	Nuclear migration protein nudC OS=Homo sapiens OX=9606 GN=NUDC PE=1 SV=1 - [NUDC_HUMAN]	1	1	Q9Y266		HCD	1	0	1	1	0	0.00235	217	246	1.55	0	47	14	12200000	2	601.817	1202.63	0	-0.18	28.83	9633	9633	MS2	0/0	0	0	hala.raw
High	A	2	IDPTLcR	5683	Unambiguous	Eukaryotic translation initiation factor 2 subunit 3 OS=Homo sapiens OX=9606 GN=EIF2S3 PE=1 SV=3 - [IF2G_HUMAN]	2	1	P41091	C6(Carbamidomethyl)	HCD	1	0	1	1	0.004	0.0549	213	198	1.57	0	60	14	4950000	2	437.726	874.445	0	-0.32	28.83	9634	9634	MS2	0/0	0	0	hala.raw
High	A	2	QEYVDYSESAK	5685	Unambiguous	H/ACA ribonucleoprotein complex subunit DKC1 OS=Homo sapiens OX=9606 GN=DKC1 PE=1 SV=3 - [DKC1_HUMAN]	1	1	O60832		HCD	1	0	1	1	0	0.000543	38	33	1.76	0	67	60	3340000	2	659.792	1318.58	0	-1.68	28.83	9635	9635	MS2	0/0	0	0	hala.raw
High	A	2	EASDPQPEEADGGLK	4768	Unambiguous	F-actin-capping protein subunit alpha-1 OS=Homo sapiens OX=9606 GN=CAPZA1 PE=1 SV=3 - [CAZA1_HUMAN]	1	1	P52907		HCD	1	0	1	1	0	0.00523	75	77	1.41	0	35	60	1040000	2	771.851	1542.69	0	2	28.83	9637	9637	MS2	0/0	0	0	hala.raw
High	A	2	GIPHLVTHDAR	4697	Unambiguous	40S ribosomal protein S4, X isoform OS=Homo sapiens OX=9606 GN=RPS4X PE=1 SV=2 - [RS4X_HUMAN]	3	1	P62701		HCD	1	0	1	2	0.004	0.0578	267	278	1.24	0	50	36	2570000	3	405.891	1215.66	0	-0.67	28.83	9638	9638	MS2	0/0	0	0	hala.raw
High	A	2	GEQVSQNGLPAEQGSPR	5695	Unambiguous	Spectrin beta chain, non-erythrocytic 1 OS=Homo sapiens OX=9606 GN=SPTBN1 PE=1 SV=2 - [SPTB2_HUMAN]	1	1	Q01082		HCD	1	0	1	1	0	0.000129	165	157	2.06	0	12	60	1520000	2	877.428	1753.85	0	0.92	28.84	9639	9639	MS2	0/0	0	0	hala.raw
High	A	2	VTLTSEEEAR	4815	Unambiguous	L-lactate dehydrogenase A chain OS=Homo sapiens OX=9606 GN=LDHA PE=1 SV=2 - [LDHA_HUMAN]	1	1	P00338		HCD	1	0	1	1	0	8.02e-05	215	202	1.96	0	26	4	34000000	2	567.785	1134.56	0	-0.85	28.84	9641	9641	MS2	0/0	0	0	hala.raw
High	A	2	TNQELQEINR	5701	Unambiguous	Annexin A2 OS=Homo sapiens OX=9606 GN=ANXA2 PE=1 SV=2 - [ANXA2_HUMAN]	2	1	P07355		HCD	1	0	1	1	0	3.92e-05	211	235	2.52	0	9	3	98200000	2	622.815	1244.62	0	-0.61	28.85	9644	9644	MS2	0/0	0	0	hala.raw
High	A	2	SEEAHAEDSVMDHHFR	5675	Unambiguous	Plasminogen activator inhibitor 1 RNA-binding protein OS=Homo sapiens OX=9606 GN=SERBP1 PE=1 SV=2 - [PAIRB_HUMAN]	1	1	Q8NC51		HCD	1	0	1	1	0	1.23e-05	33	39	1.43	0	37	5	29500000	4	474.954	1896.79	0	0.04	28.85	9645	9645	MS2	0/0	0	0	hala.raw
Middle	A	2	EVSTYIK	150	Unambiguous	Elongation factor 1-alpha 1 OS=Homo sapiens OX=9606 GN=EEF1A1 PE=1 SV=1 - [EF1A1_HUMAN]	2	1	P68104		HCD	1	0	1	1	0.039	0.402	114	130	1.05	0	10	11	16000000	2	420.229	839.451	0	-0.17	28.85	9646	9646	MS2	0/0	0	0	hala.raw
High	A	2	NIIHGSDSVESAEK	4256	Unambiguous	Nucleoside diphosphate kinase A OS=Homo sapiens OX=9606 GN=NME1 PE=1 SV=1 - [NDKA_HUMAN]	1	1	P15531		HCD	1	0	1	1	0	8.35e-06	127	137	2.29	0	47	60	7100000	2	743.363	1485.72	0	-0.07	28.85	9647	9647	MS2	0/0	0	0	hala.raw
High	A	2	GPVKPTGGPGGGGTQTQQQMNQLK	5709	Unambiguous	Probable ATP-dependent RNA helicase DDX6 OS=Homo sapiens OX=9606 GN=DDX6 PE=1 SV=2 - [DDX6_HUMAN]	1	1	P26196		HCD	1	0	1	1	0	0.00338	198	194	1.99	0	33	60	2680000	3	789.402	2366.19	0	0.78	28.86	9648	9648	MS2	0/0	0	0	hala.raw
High	A	2	FNAHGDANTIVcNSK	5190	Unambiguous	Galectin-1 OS=Homo sapiens OX=9606 GN=LGALS1 PE=1 SV=2 - [LEG1_HUMAN]	1	1	P09382	C12(Carbamidomethyl)	HCD	1	0	1	1	0	0.00465	102	99	1.65	0	44	60	1500000	2	824.381	1647.75	0	-0.3	28.86	9649	9649	MS2	0/0	0	0	hala.raw
High	A	2	HTGPNSPDTANDGFVR	5021	Unambiguous	Heterogeneous nuclear ribonucleoprotein H2 OS=Homo sapiens OX=9606 GN=HNRNPH2 PE=1 SV=1 - [HNRH2_HUMAN]|Heterogeneous nuclear ribonucleoprotein H OS=Homo sapiens OX=9606 GN=HNRNPH1 PE=1 SV=4 - [HNRH1_HUMAN]	2	2	P55795;P31943		HCD	1	0	1	1	0	0.000258	98	98	1.87	0	51	60	3690000	2	842.887	1684.77	0	-0.34	28.86	9650	9650	MS2	0/0	0	0	hala.raw
High	A	2	ADLDVSGPK	5282	Unambiguous	Neuroblast differentiation-associated protein AHNAK OS=Homo sapiens OX=9606 GN=AHNAK PE=1 SV=2 - [AHNK_HUMAN]	1	1	Q09666		HCD	1	0	1	1	0	0.000775	162	188	1.61	0	64	7	8130000	2	451.237	901.467	0	4.85	28.87	9654	9654	MS2	0/0	0	0	hala.raw
High	A	2	ADIDVSGPK	5282	Unambiguous	Neuroblast differentiation-associated protein AHNAK OS=Homo sapiens OX=9606 GN=AHNAK PE=1 SV=2 - [AHNK_HUMAN]	1	1	Q09666		HCD	1	0	1	2	0	0.000775	162	188	1.61	0	64	7	8130000	2	451.237	901.467	0	4.85	28.87	9654	9654	MS2	0/0	0	0	hala.raw
Middle	A	2	EIAQDFK	4854	Unambiguous	Histone H3.1 OS=Homo sapiens OX=9606 GN=HIST1H3A PE=1 SV=2 - [H31_HUMAN]	4	1	P68431		HCD	1	0	1	2	0.013	0.175	134	162	1.25	0	5	4	55100000	2	425.719	850.431	0	0.33	28.88	9662	9662	MS2	0/0	0	0	hala.raw
High	A	2	DVDAAYMSK	5737	Unambiguous	Keratin, type II cytoskeletal 7 OS=Homo sapiens OX=9606 GN=KRT7 PE=1 SV=5 - [K2C7_HUMAN]	1	1	P08729		HCD	1	0	1	1	0	0.00399	53	51	1.52	0	29	5	26700000	2	500.226	999.445	0	-0.17	28.89	9665	9665	MS2	0/0	0	0	hala.raw
High	A	2	EVATNSELVQSGK	4862	Unambiguous	Keratin, type I cytoskeletal 17 OS=Homo sapiens OX=9606 GN=KRT17 PE=1 SV=2 - [K1C17_HUMAN]	2	1	Q04695		HCD	1	0	1	1	0	2.28e-06	218	208	2.47	0	11	16	20900000	2	681.35	1361.69	0	0.87	28.89	9666	9666	MS2	0/0	0	0	hala.raw
High	A	2	AIYQATYR	5752	Unambiguous	Proteasome subunit beta type-5 OS=Homo sapiens OX=9606 GN=PSMB5 PE=1 SV=3 - [PSB5_HUMAN]	1	1	P28074		HCD	1	0	1	1	0.005	0.0716	123	135	1.27	0	74	9	8800000	2	493.26	985.512	0	1.68	28.91	9673	9673	MS2	0/0	0	0	hala.raw
High	A	2	IKDPDASKPEDWDER	5754	Unambiguous	Calreticulin OS=Homo sapiens OX=9606 GN=CALR PE=1 SV=1 - [CALR_HUMAN]	1	1	P27797		HCD	1	0	1	1	0	0.00644	142	143	1.98	1	51	60	3120000	2	900.923	1800.84	0	-0.59	28.91	9674	9674	MS2	0/0	0	0	hala.raw
High	A	2	HEQNIDcGGGYVK	3439	Unambiguous	Calreticulin OS=Homo sapiens OX=9606 GN=CALR PE=1 SV=1 - [CALR_HUMAN]	1	1	P27797	C7(Carbamidomethyl)	HCD	1	0	1	1	0	1.96e-09	58	63	3.55	0	23	56	6850000	2	738.83	1476.65	0	-0.03	28.92	9678	9678	MS2	0/0	0	0	hala.raw
High	A	2	SEISELR	5764	Unambiguous	Keratin, type I cytoskeletal 17 OS=Homo sapiens OX=9606 GN=KRT17 PE=1 SV=2 - [K1C17_HUMAN]	2	1	Q04695		HCD	1	0	1	1	0	0.00936	237	247	1.62	0	42	10	9700000	2	417.224	833.44	0	4.72	28.92	9680	9680	MS2	0/0	0	0	hala.raw
High	A	2	ALDLDSScK	5772	Unambiguous	Stress-induced-phosphoprotein 1 OS=Homo sapiens OX=9606 GN=STIP1 PE=1 SV=1 - [STIP1_HUMAN]	1	1	P31948	C8(Carbamidomethyl)	HCD	1	0	1	1	0	0.00469	108	117	1.66	0	59	18	4540000	2	504.737	1008.47	0	0.76	28.94	9686	9686	MS2	0/0	0	0	hala.raw
High	A	2	GETVNDcHAEIISR	5774	Unambiguous	Double-stranded RNA-specific adenosine deaminase OS=Homo sapiens OX=9606 GN=ADAR PE=1 SV=4 - [DSRAD_HUMAN]	1	1	P55265	C7(Carbamidomethyl)	HCD	1	0	1	1	0	0.000123	99	84	1.94	0	44	60	2810000	2	800.874	1600.74	0	1.36	28.94	9687	9687	MS2	0/0	0	0	hala.raw
High	A	2	VVLIGGKPDR	5776	Unambiguous	Heterogeneous nuclear ribonucleoprotein K OS=Homo sapiens OX=9606 GN=HNRNPK PE=1 SV=1 - [HNRPK_HUMAN]	1	1	P61978		HCD	1	0	1	1	0	0.00087	54	42	2.44	0	28	60	2180000	3	351.886	1053.64	0	1.65	28.94	9688	9688	MS2	0/0	0	0	hala.raw
High	A	2	NNASTDYDLSDK	5349	Unambiguous	60S ribosomal protein L3 OS=Homo sapiens OX=9606 GN=RPL3 PE=1 SV=2 - [RL3_HUMAN]	1	1	P39023		HCD	1	0	1	1	0	0.000211	26	20	1.98	0	51	60	4430000	2	671.789	1342.57	0	-3.58	28.95	9690	9690	MS2	0/0	0	0	hala.raw
High	A	2	ELGTVMR	5780	Unambiguous	Calmodulin-1 OS=Homo sapiens OX=9606 GN=CALM1 PE=1 SV=1 - [CALM1_HUMAN]	3	1	P0DP23		HCD	1	0	1	1	0.001	0.0208	270	249	1.95	0	62	10	11700000	2	403.216	805.424	0	0.22	28.95	9691	9691	MS2	0/0	0	0	hala.raw
High	A	2	DANNGNLQLR	5784	Unambiguous	Lupus La protein OS=Homo sapiens OX=9606 GN=SSB PE=1 SV=2 - [LA_HUMAN]	1	1	P05455		HCD	1	0	1	1	0	0.000132	128	139	2.18	0	54	13	6570000	2	557.783	1114.56	0	-0.9	28.95	9693	9693	MS2	0/0	0	0	hala.raw
High	A	2	AAEAAAAPAESAAPAAGEEPSKEEGEPK	5053	Unambiguous	Brain acid soluble protein 1 OS=Homo sapiens OX=9606 GN=BASP1 PE=1 SV=2 - [BASP1_HUMAN]	1	1	P80723		HCD	1	0	1	1	0.002	0.0339	124	110	2.14	1	29	60	840000	3	879.416	2636.23	0	0.28	28.95	9694	9694	MS2	0/0	0	0	hala.raw
High	A	2	TPGPGAQSALR	3894	Unambiguous	40S ribosomal protein S14 OS=Homo sapiens OX=9606 GN=RPS14 PE=1 SV=3 - [RS14_HUMAN]	1	1	P62263		HCD	1	0	1	1	0	0.00145	134	135	1.79	0	55	7	11000000	2	527.786	1054.56	0	0.55	28.96	9697	9697	MS2	0/0	0	0	hala.raw
High	A	2	APEQEQAAPGPAAGGEAPK	3410	Unambiguous	Brain acid soluble protein 1 OS=Homo sapiens OX=9606 GN=BASP1 PE=1 SV=2 - [BASP1_HUMAN]	1	1	P80723		HCD	1	0	1	1	0	2.43e-06	196	167	3.48	0	28	60	5110000	2	888.436	1775.86	0	4.69	28.96	9698	9698	MS2	0/0	0	0	hala.raw
High	A	2	SPPPGMGLNQNR	5794	Unambiguous	Splicing factor, proline- and glutamine-rich OS=Homo sapiens OX=9606 GN=SFPQ PE=1 SV=2 - [SFPQ_HUMAN]	1	1	P23246		HCD	1	0	1	1	0.003	0.0396	162	164	1.3	0	34	60	5750000	2	634.315	1267.62	0	1.74	28.96	9699	9699	MS2	0/0	0	0	hala.raw
High	A	2	NMSVIAHVDHGK	4445	Unambiguous	Elongation factor 2 OS=Homo sapiens OX=9606 GN=EEF2 PE=1 SV=4 - [EF2_HUMAN]	1	1	P13639		HCD	1	0	1	1	0	0.00112	212	203	1.81	0	54	60	7950000	2	654.33	1307.65	0	-0.3	28.97	9703	9703	MS2	0/0	0	0	hala.raw
High	A	2	AGFAGDDAPR	3795	Unambiguous	Actin, alpha cardiac muscle 1 OS=Homo sapiens OX=9606 GN=ACTC1 PE=1 SV=1 - [ACTC_HUMAN]|Actin, cytoplasmic 1 OS=Homo sapiens OX=9606 GN=ACTB PE=1 SV=1 - [ACTB_HUMAN]	10	2	P68032;P60709		HCD	1	0	1	1	0	0.0003	84	91	1.71	0	21	2	75800000	2	488.728	976.45	0	1.31	28.98	9705	9705	MS2	0/0	0	0	hala.raw
High	A	2	VEILANDQGNR	5811	Unambiguous	Heat shock cognate 71 kDa protein OS=Homo sapiens OX=9606 GN=HSPA8 PE=1 SV=1 - [HSP7C_HUMAN]|Endoplasmic reticulum chaperone BiP OS=Homo sapiens OX=9606 GN=HSPA5 PE=1 SV=2 - [BIP_HUMAN]|Heat shock 70 kDa protein 1-like OS=Homo sapiens OX=9606 GN=HSPA1L PE=1 SV=2 - [HS71L_HUMAN]|Heat shock 70 kDa protein 1A OS=Homo sapiens OX=9606 GN=HSPA1A PE=1 SV=1 - [HS71A_HUMAN]|Heat shock 70 kDa protein 6 OS=…	7	3	P11142;P11021;P0DMV8		HCD	1	0	1	1	0	9.62e-05	163	178	2.37	0	13	7	36300000	2	614.818	1228.63	0	0.2	28.99	9709	9709	MS2	0/0	0	0	hala.raw
High	A	2	VEIIANDQGNR	5811	Unambiguous	Heat shock cognate 71 kDa protein OS=Homo sapiens OX=9606 GN=HSPA8 PE=1 SV=1 - [HSP7C_HUMAN]|Endoplasmic reticulum chaperone BiP OS=Homo sapiens OX=9606 GN=HSPA5 PE=1 SV=2 - [BIP_HUMAN]|Heat shock 70 kDa protein 1-like OS=Homo sapiens OX=9606 GN=HSPA1L PE=1 SV=2 - [HS71L_HUMAN]|Heat shock 70 kDa protein 1A OS=Homo sapiens OX=9606 GN=HSPA1A PE=1 SV=1 - [HS71A_HUMAN]|Heat shock 70 kDa protein 6 OS=…	7	3	P11142;P11021;P0DMV8		HCD	1	0	1	2	0	9.62e-05	163	178	2.37	0	13	7	36300000	2	614.818	1228.63	0	0.2	28.99	9709	9709	MS2	0/0	0	0	hala.raw
High	A	2	NMMAAcDPR	4343	Unambiguous	Tubulin beta-2A chain OS=Homo sapiens OX=9606 GN=TUBB2A PE=1 SV=1 - [TBB2A_HUMAN]|Tubulin beta-3 chain OS=Homo sapiens OX=9606 GN=TUBB3 PE=1 SV=2 - [TBB3_HUMAN]|Tubulin beta-4A chain OS=Homo sapiens OX=9606 GN=TUBB4A PE=1 SV=2 - [TBB4A_HUMAN]|Tubulin beta-4B chain OS=Homo sapiens OX=9606 GN=TUBB4B PE=1 SV=1 - [TBB4B_HUMAN]|Tubulin beta chain OS=Homo sapiens OX=9606 GN=TUBB PE=1 SV=2 - [TBB5_HUMAN…	9	3	P68371;P07437;Q9BUF5	C6(Carbamidomethyl)	HCD	1	0	1	1	0.003	0.0465	14	13	1.65	0	46	11	16700000	2	533.218	1065.43	0	0.49	28.99	9710	9710	MS2	0/0	0	0	hala.raw
High	A	2	EFHLNESGDPSSK	5816	Unambiguous	Protein SET OS=Homo sapiens OX=9606 GN=SET PE=1 SV=3 - [SET_HUMAN]	2	1	Q01105		HCD	1	0	1	1	0	0.00025	88	86	1.73	0	25	12	21600000	3	482.888	1446.65	0	0.89	28.99	9711	9711	MS2	0/0	0	0	hala.raw
High	A	2	VVLIGGKPDR	5776	Unambiguous	Heterogeneous nuclear ribonucleoprotein K OS=Homo sapiens OX=9606 GN=HNRNPK PE=1 SV=1 - [HNRPK_HUMAN]	1	1	P61978		HCD	1	0	1	1	0.001	0.0203	42	36	1.61	0	54	10	12400000	2	527.324	1053.64	0	0.07	28.99	9712	9712	MS2	0/0	0	0	hala.raw
High	A	2	AQAAAPASVPAQAPK	4933	Unambiguous	60S ribosomal protein L29 OS=Homo sapiens OX=9606 GN=RPL29 PE=1 SV=2 - [RL29_HUMAN]	1	1	P47914		HCD	1	0	1	1	0	1.13e-05	195	224	2.43	0	29	59	9190000	2	689.378	1377.75	0	0.27	28.99	9713	9713	MS2	0/0	0	0	hala.raw
High	A	2	IIAPPER	4510	Unambiguous	Actin, alpha cardiac muscle 1 OS=Homo sapiens OX=9606 GN=ACTC1 PE=1 SV=1 - [ACTC_HUMAN]|Beta-actin-like protein 2 OS=Homo sapiens OX=9606 GN=ACTBL2 PE=1 SV=2 - [ACTBL_HUMAN]|Actin, cytoplasmic 1 OS=Homo sapiens OX=9606 GN=ACTB PE=1 SV=1 - [ACTB_HUMAN]	7	3	P68032;Q562R1;P60709		HCD	1	0	1	1	0.005	0.0752	61	60	1.7	0	20	5	37400000	2	398.24	795.473	0	0.66	29	9716	9716	MS2	0/0	0	0	hala.raw
High	A	2	YTcSFcGK	3898	Unambiguous	60S ribosomal protein L37a OS=Homo sapiens OX=9606 GN=RPL37A PE=1 SV=2 - [RL37A_HUMAN]	2	1	P61513	C3(Carbamidomethyl); C6(Carbamidomethyl)	HCD	1	0	1	1	0	0.00801	19	9	1.72	0	56	60	2840000	2	511.708	1022.41	0	1.13	29	9717	9717	MS2	0/0	0	0	hala.raw
High	A	2	ILDNTSEPQPGEAR	5828	Unambiguous	Carnitine O-palmitoyltransferase 1, liver isoform OS=Homo sapiens OX=9606 GN=CPT1A PE=1 SV=2 - [CPT1A_HUMAN]	1	1	P50416		HCD	1	0	1	1	0	0.000178	146	136	2.15	0	42	60	2210000	2	763.877	1526.75	0	1.49	29	9718	9718	MS2	0/0	0	0	hala.raw
High	A	2	EDMAALEK	5401	Unambiguous	Tubulin alpha-1A chain OS=Homo sapiens OX=9606 GN=TUBA1A PE=1 SV=1 - [TBA1A_HUMAN]|Tubulin alpha-1B chain OS=Homo sapiens OX=9606 GN=TUBA1B PE=1 SV=1 - [TBA1B_HUMAN]|Tubulin alpha-1C chain OS=Homo sapiens OX=9606 GN=TUBA1C PE=1 SV=1 - [TBA1C_HUMAN]|Tubulin alpha-4A chain OS=Homo sapiens OX=9606 GN=TUBA4A PE=1 SV=1 - [TBA4A_HUMAN]	4	2	Q9BQE3;P68366		HCD	1	0	1	1	0.001	0.0177	89	92	1.72	0	26	7	20900000	2	453.716	906.425	0	1.26	29.01	9721	9721	MS2	0/0	0	0	hala.raw
High	A	2	VDNDENEHQLSLR	5397	Unambiguous	Nucleophosmin OS=Homo sapiens OX=9606 GN=NPM1 PE=1 SV=2 - [NPM_HUMAN]	1	1	P06748		HCD	1	0	1	1	0	2.45e-06	146	115	2.92	0	25	47	17500000	2	784.869	1568.73	0	1.03	29.01	9722	9722	MS2	0/0	0	0	hala.raw
High	A	2	TIIQNPTDQQK	5838	Unambiguous	Proliferation-associated protein 2G4 OS=Homo sapiens OX=9606 GN=PA2G4 PE=1 SV=3 - [PA2G4_HUMAN]	1	1	Q9UQ80		HCD	1	0	1	1	0	0.000257	197	193	2.25	0	37	60	7700000	2	643.341	1285.68	0	0.78	29.01	9724	9724	MS2	0/0	0	0	hala.raw
High	A	2	IKDPDASKPEDWDER	5754	Unambiguous	Calreticulin OS=Homo sapiens OX=9606 GN=CALR PE=1 SV=1 - [CALR_HUMAN]	1	1	P27797		HCD	1	0	1	1	0	0.000203	143	141	2.51	1	18	15	24600000	3	600.952	1800.84	0	0.35	29.02	9725	9725	MS2	0/0	0	0	hala.raw
High	A	2	cYEMASHLR	4981	Unambiguous	Profilin-1 OS=Homo sapiens OX=9606 GN=PFN1 PE=1 SV=2 - [PROF1_HUMAN]	1	1	P07737	C1(Carbamidomethyl)	HCD	1	0	1	1	0	0.00101	67	61	2.19	0	40	30	7260000	3	389.508	1166.51	0	0.54	29.02	9726	9726	MS2	0/0	0	0	hala.raw
High	A	2	MPSGEFAR	5403	Unambiguous	Proliferating cell nuclear antigen OS=Homo sapiens OX=9606 GN=PCNA PE=1 SV=1 - [PCNA_HUMAN]	1	1	P12004		HCD	1	0	1	1	0.009	0.135	107	86	1.47	0	51	22	5570000	2	447.71	894.414	0	-0.35	29.02	9727	9727	MS2	0/0	0	0	hala.raw
High	A	2	LQDAEIAR	4069	Unambiguous	Protein S100-A6 OS=Homo sapiens OX=9606 GN=S100A6 PE=1 SV=1 - [S10A6_HUMAN]	1	1	P06703		HCD	1	0	1	1	0	0.00393	140	151	1.77	0	49	10	10500000	2	458.248	915.489	0	-0.31	29.02	9729	9729	MS2	0/0	0	0	hala.raw
High	A	2	HSGPNSADSANDGFVR	3868	Unambiguous	Heterogeneous nuclear ribonucleoprotein F OS=Homo sapiens OX=9606 GN=HNRNPF PE=1 SV=3 - [HNRPF_HUMAN]	1	1	P52597		HCD	1	0	1	1	0.002	0.0281	53	58	1.39	0	28	60	2240000	2	815.863	1630.72	0	-0.9	29.03	9730	9730	MS2	0/0	0	0	hala.raw
High	A	2	YTcSFcGK	3898	Unambiguous	60S ribosomal protein L37a OS=Homo sapiens OX=9606 GN=RPL37A PE=1 SV=2 - [RL37A_HUMAN]	2	1	P61513	C3(Carbamidomethyl); C6(Carbamidomethyl)	HCD	1	0	1	1	0.005	0.0636	18	9	1.16	0	49	60	3630000	2	511.707	1022.41	0	0.11	29.03	9731	9731	MS2	0/0	0	0	hala.raw
High	A	2	QEAVVEEDYNENAK	5854	Unambiguous	High mobility group nucleosome-binding domain-containing protein 5 OS=Homo sapiens OX=9606 GN=HMGN5 PE=1 SV=1 - [HMGN5_HUMAN]	1	1	P82970		HCD	1	0	1	1	0	9.85e-05	75	91	2.1	0	37	60	1960000	2	819.37	1637.73	0	1.97	29.04	9734	9734	MS2	0/0	0	0	hala.raw
Middle	A	2	GSSEQAESDNMDVPPEDDSK	5856	Unambiguous	Interleukin enhancer-binding factor 3 OS=Homo sapiens OX=9606 GN=ILF3 PE=1 SV=3 - [ILF3_HUMAN]	1	1	Q12906		HCD	1	0	1	1	0.031	0.337	11	9	0.55	0		60	0	2	1068.93	2136.85	0	1.16	29.04	9735	9735	MS2	0/0	0	0	hala.raw
Middle	A	2	IKDPDASKPEDWDER	5754	Unambiguous	Calreticulin OS=Homo sapiens OX=9606 GN=CALR PE=1 SV=1 - [CALR_HUMAN]	1	1	P27797		HCD	1	0	1	1	0.025	0.289	143	141	2.46	1	19	10	24300000	3	600.952	1800.84	0	0.35	29.04	9736	9736	MS2	0/0	0	0	hala.raw
High	A	2	TVIDYNGER	5860	Unambiguous	Protein disulfide-isomerase OS=Homo sapiens OX=9606 GN=P4HB PE=1 SV=3 - [PDIA1_HUMAN]	1	1	P07237		HCD	1	0	1	1	0	0.00191	128	156	1.78	0	60	6	16000000	2	533.761	1066.51	0	-2.4	29.04	9737	9737	MS2	0/0	0	0	hala.raw
Middle	A	2	KPVNELR	5862	Unambiguous	Transforming growth factor-beta receptor-associated protein 1 OS=Homo sapiens OX=9606 GN=TGFBRAP1 PE=1 SV=1 - [TGFA1_HUMAN]	1	1	Q8WUH2		HCD	1	0	1	1	0.039	0.404	60	67	1.56	0	30	17	11000000	2	428.256	855.505	0	0.17	29.05	9739	9739	MS2	0/0	0	0	hala.raw
High	A	2	SNYNLPMHK	5625	Unambiguous	60S ribosomal protein L4 OS=Homo sapiens OX=9606 GN=RPL4 PE=1 SV=5 - [RL4_HUMAN]	1	1	P36578		HCD	1	0	1	1	0.004	0.056	118	117	1.21	0	53	14	6410000	2	552.269	1103.53	0	0.05	29.05	9740	9740	MS2	0/0	0	0	hala.raw
High	A	2	GVDLQENNPASR	5580	Unambiguous	Ras-related protein Rab-5C OS=Homo sapiens OX=9606 GN=RAB5C PE=1 SV=2 - [RAB5C_HUMAN]	1	1	P51148		HCD	1	0	1	1	0	3.86e-05	129	132	2.44	0	41	60	2780000	2	650.317	1299.63	0	-1.03	29.05	9741	9741	MS2	0/0	0	0	hala.raw
High	A	2	AANGVVLATEK	5870	Unambiguous	Proteasome subunit alpha type-2 OS=Homo sapiens OX=9606 GN=PSMA2 PE=1 SV=2 - [PSA2_HUMAN]	1	1	P25787		HCD	1	0	1	1	0.003	0.0397	177	179	1.11	0	79	6	8270000	2	536.803	1072.6	0	-0.32	29.05	9743	9743	MS2	0/0	0	0	hala.raw
High	A	2	VDNDENEHQLSLR	5397	Unambiguous	Nucleophosmin OS=Homo sapiens OX=9606 GN=NPM1 PE=1 SV=2 - [NPM_HUMAN]	1	1	P06748		HCD	1	0	1	1	0	0.000621	148	118	2.21	0	45	11	33300000	3	523.582	1568.73	0	0.4	29.06	9747	9747	MS2	0/0	0	0	hala.raw
High	A	2	SNYNLPMHK	5625	Unambiguous	60S ribosomal protein L4 OS=Homo sapiens OX=9606 GN=RPL4 PE=1 SV=5 - [RL4_HUMAN]	1	1	P36578		HCD	1	0	1	1	0	0.00287	112	117	1.86	0	54	23	5560000	2	552.268	1103.53	0	-2.06	29.06	9748	9748	MS2	0/0	0	0	hala.raw
High	A	2	cYEMASHLR	4981	Unambiguous	Profilin-1 OS=Homo sapiens OX=9606 GN=PFN1 PE=1 SV=2 - [PROF1_HUMAN]	1	1	P07737	C1(Carbamidomethyl)	HCD	1	0	1	1	0	0.00145	67	61	2.09	0	53	60	6190000	2	583.758	1166.51	0	0.68	29.06	9749	9749	MS2	0/0	0	0	hala.raw
High	A	2	SEDGEIVSTPR	5882	Unambiguous	Nuclear pore complex protein Nup160 OS=Homo sapiens OX=9606 GN=NUP160 PE=1 SV=3 - [NU160_HUMAN]	1	1	Q12769		HCD	1	0	1	1	0.008	0.124	117	121	1.48	0	64	60	4470000	2	595.287	1189.57	0	-1.81	29.07	9750	9750	MS2	0/0	0	0	hala.raw
High	A	2	ETMQSLNDR	1322	Unambiguous	Keratin, type I cytoskeletal 18 OS=Homo sapiens OX=9606 GN=KRT18 PE=1 SV=2 - [K1C18_HUMAN]	2	1	P05783		HCD	1	0	1	1	0	0.00161	77	64	1.95	0	47	20	6860000	2	547.251	1093.49	0	-0.44	29.07	9752	9752	MS2	0/0	0	0	hala.raw
High	A	2	AVVGVVAGGGR	5886	Unambiguous	60S ribosomal protein L8 OS=Homo sapiens OX=9606 GN=RPL8 PE=1 SV=2 - [RL8_HUMAN]	1	1	P62917		HCD	1	0	1	1	0	0.000225	77	87	2.47	0	34	4	40300000	2	471.28	941.553	0	0.48	29.07	9753	9753	MS2	0/0	0	0	hala.raw
High	A	2	AAEAAAAPAESAAPAAGEEPSK	5029	Unambiguous	Brain acid soluble protein 1 OS=Homo sapiens OX=9606 GN=BASP1 PE=1 SV=2 - [BASP1_HUMAN]	1	1	P80723		HCD	1	0	1	1	0	5.78e-05	134	144	2.33	0	46	60	1950000	2	983.97	1966.93	0	-0.88	29.09	9758	9758	MS2	0/0	0	0	hala.raw
High	A	2	QEYDESGPSIVHR	5898	Unambiguous	Actin, cytoplasmic 1 OS=Homo sapiens OX=9606 GN=ACTB PE=1 SV=1 - [ACTB_HUMAN]	7	1	P60709		HCD	1	0	1	1	0	8.03e-07	92	108	2.77	0	46	7	43400000	2	758.855	1516.7	0	-0.18	29.09	9760	9760	MS2	0/0	0	0	hala.raw
Middle	A	2	EIFDSR	5463	Unambiguous	Alpha-enolase OS=Homo sapiens OX=9606 GN=ENO1 PE=1 SV=2 - [ENOA_HUMAN]	1	1	P06733		HCD	1	0	1	1	0.047	0.456	92	116	1.12	0	32	27	5140000	2	383.69	766.373	0	-0.32	29.1	9764	9764	MS2	0/0	0	0	hala.raw
High	A	2	YRPGTVALR	4616	Unambiguous	Histone H3.1 OS=Homo sapiens OX=9606 GN=HIST1H3A PE=1 SV=2 - [H31_HUMAN]	5	1	P68431		HCD	1	0	1	1	0	0.00171	148	158	2.03	0	14	2	110000000	2	516.801	1032.6	0	0.08	29.11	9767	9767	MS2	0/0	0	0	hala.raw
High	A	2	QTYSTEPNNLK	3989	Unambiguous	60S ribosomal protein L28 OS=Homo sapiens OX=9606 GN=RPL28 PE=1 SV=3 - [RL28_HUMAN]	1	1	P46779		HCD	1	0	1	1	0	0.000396	166	171	1.97	0	43	60	7090000	2	647.818	1294.63	0	0.92	29.11	9768	9768	MS2	0/0	0	0	hala.raw
High	A	2	IFAQDGEGQR	3670	Unambiguous	Filamin-B OS=Homo sapiens OX=9606 GN=FLNB PE=1 SV=2 - [FLNB_HUMAN]	1	1	O75369		HCD	1	0	1	2	0.001	0.0181	160	150	1.56	0	72	60	3280000	2	560.774	1120.54	0	2.21	29.11	9770	9770	MS2	0/0	0	0	hala.raw
High	A	2	HQEGEIFDTEK	5916	Unambiguous	60S ribosomal protein L6 OS=Homo sapiens OX=9606 GN=RPL6 PE=1 SV=3 - [RL6_HUMAN]	1	1	Q02878		HCD	1	0	1	1	0	2.54e-05	85	92	2.96	0	18	18	18000000	2	666.806	1332.6	0	-1.34	29.12	9772	9772	MS2	0/0	0	0	hala.raw
High	A	2	TVLDQQQTPSR	3859	Unambiguous	Leucine-rich PPR motif-containing protein, mitochondrial OS=Homo sapiens OX=9606 GN=LRPPRC PE=1 SV=3 - [LPPRC_HUMAN]	1	1	P42704		HCD	1	0	1	1	0	0.00524	209	194	1.9	0	69	60	2910000	2	636.831	1272.66	0	0.61	29.12	9773	9773	MS2	0/0	0	0	hala.raw
High	A	2	LASYLDK	5920	Unambiguous	Keratin, type I cytoskeletal 17 OS=Homo sapiens OX=9606 GN=KRT17 PE=1 SV=2 - [K1C17_HUMAN]|Keratin, type I cytoskeletal 12 OS=Homo sapiens OX=9606 GN=KRT12 PE=1 SV=1 - [K1C12_HUMAN]|Keratin, type I cytoskeletal 19 OS=Homo sapiens OX=9606 GN=KRT19 PE=1 SV=4 - [K1C19_HUMAN]|Keratin, type I cytoskeletal 10 OS=Homo sapiens OX=9606 GN=KRT10 PE=1 SV=6 - [K1C10_HUMAN]	8	4	Q04695;Q99456;P08727;P13645		HCD	1	0	1	1	0.002	0.0298	118	123	1.26	0	21	5	33900000	2	405.224	809.441	0	0.28	29.13	9775	9775	MS2	0/0	0	0	hala.raw
High	A	2	TVGATALPR	5924	Unambiguous	T-complex protein 1 subunit theta OS=Homo sapiens OX=9606 GN=CCT8 PE=1 SV=4 - [TCPQ_HUMAN]	1	1	P50990		HCD	1	0	1	1	0	0.00718	116	101	1.61	0	56	10	9720000	2	443.261	885.515	0	0.22	29.13	9777	9777	MS2	0/0	0	0	hala.raw
High	A	2	NFSDNQLQEGK	5512	Unambiguous	Transgelin-2 OS=Homo sapiens OX=9606 GN=TAGLN2 PE=1 SV=3 - [TAGL2_HUMAN]	1	1	P37802		HCD	1	0	1	1	0	0.00997	96	97	1.61	0	45	60	7620000	2	640.299	1279.59	0	-0.3	29.14	9780	9780	MS2	0/0	0	0	hala.raw
High	A	2	IIEDQQESLNK	4649	Unambiguous	Lupus La protein OS=Homo sapiens OX=9606 GN=SSB PE=1 SV=2 - [LA_HUMAN]	1	1	P05455		HCD	1	0	1	1	0	0.00143	236	219	2.29	0	30	60	2950000	2	658.84	1316.67	0	2	29.14	9782	9782	MS2	0/0	0	0	hala.raw
High	A	2	EAPPMEKPEVVK	5934	Unambiguous	40S ribosomal protein S15 OS=Homo sapiens OX=9606 GN=RPS15 PE=1 SV=2 - [RS15_HUMAN]	1	1	P62841		HCD	1	0	1	1	0	0.000434	203	171	2.19	0	57	18	13700000	2	677.357	1353.71	0	-0.58	29.14	9783	9783	MS2	0/0	0	0	hala.raw
High	A	2	EFHLNESGDPSSK	5816	Unambiguous	Protein SET OS=Homo sapiens OX=9606 GN=SET PE=1 SV=3 - [SET_HUMAN]	2	1	Q01105		HCD	1	0	1	1	0	1.96e-05	81	76	2.86	0	16	33	21100000	2	723.828	1446.65	0	0.06	29.15	9785	9785	MS2	0/0	0	0	hala.raw
High	A	2	YESLTDPSK	4512	Unambiguous	Heat shock protein HSP 90-beta OS=Homo sapiens OX=9606 GN=HSP90AB1 PE=1 SV=4 - [HS90B_HUMAN]|Heat shock protein HSP 90-alpha OS=Homo sapiens OX=9606 GN=HSP90AA1 PE=1 SV=5 - [HS90A_HUMAN]|Putative heat shock protein HSP 90-beta 4 OS=Homo sapiens OX=9606 GN=HSP90AB4P PE=5 SV=1 - [H90B4_HUMAN]	5	2	P08238;P07900		HCD	1	0	1	1	0	0.00277	99	103	1.81	0	27	18	7100000	2	520.249	1039.49	0	-3.01	29.15	9786	9786	MS2	0/0	0	0	hala.raw
High	A	2	cIIVEEGK	5940	Unambiguous	Destrin OS=Homo sapiens OX=9606 GN=DSTN PE=1 SV=3 - [DEST_HUMAN]	1	1	P60981	C1(Carbamidomethyl)	HCD	1	0	1	1	0.001	0.0123	233	250	1.45	0	38	12	9080000	2	474.246	947.485	0	-1.43	29.16	9788	9788	MS2	0/0	0	0	hala.raw
High	A	2	HMYHSLYLK	5942	Unambiguous	60S ribosomal protein L19 OS=Homo sapiens OX=9606 GN=RPL19 PE=1 SV=1 - [RL19_HUMAN]	1	1	P84098		HCD	1	0	1	1	0	0.00897	246	215	2.08	0	55	60	3800000	2	596.304	1191.6	0	2.67	29.16	9789	9789	MS2	0/0	0	0	hala.raw
High	A	2	SVTEQGAELSNEER	5101	Unambiguous	14-3-3 protein zeta/delta OS=Homo sapiens OX=9606 GN=YWHAZ PE=1 SV=1 - [1433Z_HUMAN]	1	1	P63104		HCD	1	0	1	1	0	2.26e-07	101	89	3.28	0	21	60	7600000	2	774.858	1548.71	0	-2.69	29.16	9791	9791	MS2	0/0	0	0	hala.raw
High	A	2	GSQFGQSccLR	5950	Unambiguous	Bifunctional glutamate/proline--tRNA ligase OS=Homo sapiens OX=9606 GN=EPRS PE=1 SV=5 - [SYEP_HUMAN]	1	1	P07814	C8(Carbamidomethyl); C9(Carbamidomethyl)	HCD	1	0	1	1	0	0.000328	38	29	2.03	0	50	60	2360000	2	650.281	1299.56	0	-1.21	29.16	9793	9793	MS2	0/0	0	0	hala.raw
High	A	2	VALSEPQPER	5954	Unambiguous	Serrate RNA effector molecule homolog OS=Homo sapiens OX=9606 GN=SRRT PE=1 SV=1 - [SRRT_HUMAN]	1	1	Q9BXP5		HCD	1	0	1	1	0.001	0.0149	175	160	1.56	0	44	26	8340000	2	563.297	1125.59	0	-2.52	29.17	9795	9795	MS2	0/0	0	0	hala.raw
High	A	2	IIAEGANGPTTPEADK	5956	Unambiguous	Glutamate dehydrogenase 1, mitochondrial OS=Homo sapiens OX=9606 GN=GLUD1 PE=1 SV=2 - [DHE3_HUMAN]	2	1	P00367		HCD	1	0	1	1	0	0.0043	188	183	1.81	0	21	60	2580000	2	792.395	1583.78	0	-5.27	29.17	9796	9796	MS2	0/0	0	0	hala.raw
High	A	2	EVYQQQQYGSGGR	3402	Unambiguous	Heterogeneous nuclear ribonucleoprotein A/B OS=Homo sapiens OX=9606 GN=HNRNPAB PE=1 SV=2 - [ROAA_HUMAN]	1	1	Q99729		HCD	1	0	1	1	0	0.000527	84	90	1.79	0	50	60	2110000	2	750.346	1499.69	0	-1.52	29.17	9797	9797	MS2	0/0	0	0	hala.raw
High	A	2	EESDDEAAVEEEEEEK	5960	Unambiguous	Endoplasmin OS=Homo sapiens OX=9606 GN=HSP90B1 PE=1 SV=1 - [ENPL_HUMAN]	1	1	P14625		HCD	1	0	1	1	0	0.000132	6	7	2.43	0	49	60	1840000	2	933.867	1866.73	0	0.51	29.17	9798	9798	MS2	0/0	0	0	hala.raw
High	A	2	VLNTNIDGR	5962	Unambiguous	40S ribosomal protein S18 OS=Homo sapiens OX=9606 GN=RPS18 PE=1 SV=3 - [RS18_HUMAN]	1	1	P62269		HCD	1	0	1	1	0	0.000245	182	183	2.03	0	27	5	27600000	2	501.273	1001.54	0	0.77	29.18	9800	9800	MS2	0/0	0	0	hala.raw
Middle	A	2	DNNLLGR	5970	Unambiguous	Heat shock 70 kDa protein 6 OS=Homo sapiens OX=9606 GN=HSPA6 PE=1 SV=2 - [HSP76_HUMAN]|Heat shock 70 kDa protein 1-like OS=Homo sapiens OX=9606 GN=HSPA1L PE=1 SV=2 - [HS71L_HUMAN]|Heat shock 70 kDa protein 1A OS=Homo sapiens OX=9606 GN=HSPA1A PE=1 SV=1 - [HS71A_HUMAN]	3	1	P0DMV8		HCD	1	0	1	1	0.035	0.371	131	128	1.54	0	28	35	7180000	2	401.214	801.421	0	0.07	29.19	9804	9804	MS2	0/0	0	0	hala.raw
High	A	2	AQLEPVASPAK	5972	Unambiguous	Plectin OS=Homo sapiens OX=9606 GN=PLEC PE=1 SV=3 - [PLEC_HUMAN]	1	1	Q15149		HCD	1	0	1	1	0	0.000262	151	147	2.21	0	55	60	3770000	2	555.811	1110.62	0	0.21	29.19	9805	9805	MS2	0/0	0	0	hala.raw
High	A	2	FNAHGDANTIVcNSK	5190	Unambiguous	Galectin-1 OS=Homo sapiens OX=9606 GN=LGALS1 PE=1 SV=2 - [LEG1_HUMAN]	1	1	P09382	C12(Carbamidomethyl)	HCD	1	0	1	1	0	0.00272	108	105	2.03	0	64	60	1190000	3	549.924	1647.76	0	1.29	29.19	9808	9808	MS2	0/0	0	0	hala.raw
Middle	A	2	GPPQEEEEEEDEEEEATK	5113	Unambiguous	Hepatoma-derived growth factor OS=Homo sapiens OX=9606 GN=HDGF PE=1 SV=1 - [HDGF_HUMAN]	1	1	P51858		HCD	1	0	1	1	0.022	0.257	1	5	0.66	0	23	60	1430000	2	1052.42	2103.84	0	1.78	29.2	9811	9811	MS2	0/0	0	0	hala.raw
High	A	2	ISSSSFSR	3579	Unambiguous	Keratin, type II cytoskeletal 8 OS=Homo sapiens OX=9606 GN=KRT8 PE=1 SV=7 - [K2C8_HUMAN]	1	1	P05787		HCD	1	0	1	1	0	0.00256	104	116	1.54	0	51	17	6690000	2	435.719	870.431	0	-0.25	29.21	9816	9816	MS2	0/0	0	0	hala.raw
Middle	A	2	DIIHDPGR	4191	Unambiguous	60S ribosomal protein L8 OS=Homo sapiens OX=9606 GN=RPL8 PE=1 SV=2 - [RL8_HUMAN]	1	1	P62917		HCD	1	0	1	1	0.023	0.271	168	171	1.44	0	69	25	5470000	2	461.738	922.469	0	-5.8	29.21	9817	9817	MS2	0/0	0	0	hala.raw
Middle	A	2	SEHPGLSIGDTAK	5995	Unambiguous	High mobility group protein B2 OS=Homo sapiens OX=9606 GN=HMGB2 PE=1 SV=2 - [HMGB2_HUMAN]	1	1	P26583		HCD	1	0	1	1	0.014	0.19	160	166	1.24	0	36	27	6450000	3	437.89	1311.65	0	0.66	29.21	9818	9818	MS2	0/0	0	0	hala.raw
High	A	2	LSVDYGK	5156	Unambiguous	Tubulin alpha-1A chain OS=Homo sapiens OX=9606 GN=TUBA1A PE=1 SV=1 - [TBA1A_HUMAN]|Tubulin alpha-1B chain OS=Homo sapiens OX=9606 GN=TUBA1B PE=1 SV=1 - [TBA1B_HUMAN]|Tubulin alpha-1C chain OS=Homo sapiens OX=9606 GN=TUBA1C PE=1 SV=1 - [TBA1C_HUMAN]|Tubulin alpha-4A chain OS=Homo sapiens OX=9606 GN=TUBA4A PE=1 SV=1 - [TBA4A_HUMAN]	5	2	Q9BQE3;P68366		HCD	1	0	1	1	0.002	0.0334	132	140	1.28	0	41	22	6970000	2	391.208	781.41	0	0.59	29.22	9821	9821	MS2	0/0	0	0	hala.raw
High	A	2	LPEGDLGK	4514	Unambiguous	Eukaryotic translation initiation factor 5A-1 OS=Homo sapiens OX=9606 GN=EIF5A PE=1 SV=2 - [IF5A1_HUMAN]	2	1	P63241		HCD	1	0	1	1	0	0.00904	83	89	1.59	0	47	19	7830000	2	414.727	828.446	0	-0.07	29.22	9823	9823	MS2	0/0	0	0	hala.raw
High	A	2	LQSIGTENTEENR	4724	Unambiguous	Fructose-bisphosphate aldolase A OS=Homo sapiens OX=9606 GN=ALDOA PE=1 SV=2 - [ALDOA_HUMAN]	1	1	P04075		HCD	1	0	1	1	0	1.22e-06	153	145	2.94	0	45	48	10400000	2	745.858	1490.71	0	0.72	29.24	9828	9828	MS2	0/0	0	0	hala.raw
High	A	2	DSYVGDEAQSK	2007	Unambiguous	Actin, alpha cardiac muscle 1 OS=Homo sapiens OX=9606 GN=ACTC1 PE=1 SV=1 - [ACTC_HUMAN]|Actin, cytoplasmic 1 OS=Homo sapiens OX=9606 GN=ACTB PE=1 SV=1 - [ACTB_HUMAN]	6	2	P68032;P60709		HCD	1	0	1	1	0	0.000452	62	57	1.82	0	35	11	15200000	2	599.765	1198.52	0	0.39	29.24	9830	9830	MS2	0/0	0	0	hala.raw
High	A	2	LKGDDLQAIK	6017	Unambiguous	Heterogeneous nuclear ribonucleoproteins C1/C2 OS=Homo sapiens OX=9606 GN=HNRNPC PE=1 SV=4 - [HNRPC_HUMAN]	4	1	P07910		HCD	1	0	1	1	0.005	0.0789	259	272	1.66	1	64	60	3740000	2	550.82	1100.63	0	0.86	29.24	9831	9831	MS2	0/0	0	0	hala.raw
High	A	2	DVDEAYMNK	5136	Unambiguous	Keratin, type II cytoskeletal 8 OS=Homo sapiens OX=9606 GN=KRT8 PE=1 SV=7 - [K2C8_HUMAN]	1	1	P05787		HCD	1	0	1	1	0.004	0.0578	54	50	1.22	0	42	60	7640000	2	542.735	1084.46	0	0.78	29.26	9841	9841	MS2	0/0	0	0	hala.raw
High	A	2	YNQLLR	6040	Unambiguous	Alpha-enolase OS=Homo sapiens OX=9606 GN=ENO1 PE=1 SV=2 - [ENOA_HUMAN]	1	1	P06733		HCD	1	0	1	1	0.008	0.117	198	194	1.3	0	27	4	35800000	2	403.73	806.452	0	-0.05	29.27	9844	9844	MS2	0/0	0	0	hala.raw
High	A	2	GPAYGLSR	4309	Unambiguous	Transgelin-2 OS=Homo sapiens OX=9606 GN=TAGLN2 PE=1 SV=3 - [TAGL2_HUMAN]	1	1	P37802		HCD	1	0	1	1	0.002	0.0274	196	186	1.65	0	41	25	4100000	2	410.72	820.432	0	0.95	29.28	9850	9850	MS2	0/0	0	0	hala.raw
High	A	2	MDSTANEVEAVK	6072	Unambiguous	Protein disulfide-isomerase OS=Homo sapiens OX=9606 GN=P4HB PE=1 SV=3 - [PDIA1_HUMAN]	1	1	P07237		HCD	1	0	1	1	0	8.04e-06	111	116	2.08	0	52	60	4850000	2	647.303	1293.6	0	-0.2	29.31	9863	9863	MS2	0/0	0	0	hala.raw
High	A	2	AQYEDIANR	4800	Unambiguous	Keratin, type II cytoskeletal 8 OS=Homo sapiens OX=9606 GN=KRT8 PE=1 SV=7 - [K2C8_HUMAN]	2	1	P05787		HCD	1	0	1	1	0.002	0.0275	120	108	1.51	0	53	5	21400000	2	540.259	1079.51	0	-0.23	29.32	9867	9867	MS2	0/0	0	0	hala.raw
High	A	2	HFVALSTNTTK	5665	Unambiguous	Glucose-6-phosphate isomerase OS=Homo sapiens OX=9606 GN=GPI PE=1 SV=4 - [G6PI_HUMAN]	1	1	P06744		HCD	1	0	1	1	0	1.51e-05	207	217	2.5	0	49	60	4910000	2	609.827	1218.65	0	-1.1	29.32	9868	9868	MS2	0/0	0	0	hala.raw
High	A	2	LMSNLDSNR	5071	Unambiguous	Protein S100-A4 OS=Homo sapiens OX=9606 GN=S100A4 PE=1 SV=1 - [S10A4_HUMAN]	1	1	P26447		HCD	1	0	1	1	0	0.000316	161	166	1.71	0	36	6	29300000	2	525.255	1049.5	0	-1.07	29.33	9870	9870	MS2	0/0	0	0	hala.raw
High	A	2	VLDSGAPIK	6086	Unambiguous	ATP synthase subunit beta, mitochondrial OS=Homo sapiens OX=9606 GN=ATP5F1B PE=1 SV=3 - [ATPB_HUMAN]	1	1	P06576		HCD	1	0	1	1	0.001	0.0159	93	96	1.43	0	29	8	12800000	2	450.264	899.52	0	0.46	29.33	9871	9871	MS2	0/0	0	0	hala.raw
High	A	2	ETPAATEAPSSTPK	2813	Unambiguous	Brain acid soluble protein 1 OS=Homo sapiens OX=9606 GN=BASP1 PE=1 SV=2 - [BASP1_HUMAN]	1	1	P80723		HCD	1	0	1	1	0	1.81e-05	152	132	2.54	0	75	60	3930000	2	693.845	1386.68	0	5.86	29.34	9874	9874	MS2	0/0	0	0	hala.raw
High	A	2	FSGDLDDQTcR	6094	Unambiguous	Lupus La protein OS=Homo sapiens OX=9606 GN=SSB PE=1 SV=2 - [LA_HUMAN]	1	1	P05455	C10(Carbamidomethyl)	HCD	1	0	1	1	0	6.56e-05	19	22	2.37	0	49	60	7340000	2	657.275	1313.54	0	0.14	29.34	9876	9876	MS2	0/0	0	0	hala.raw
High	A	2	VTLTSEEEAR	4815	Unambiguous	L-lactate dehydrogenase A chain OS=Homo sapiens OX=9606 GN=LDHA PE=1 SV=2 - [LDHA_HUMAN]	1	1	P00338		HCD	1	0	1	1	0	9.64e-05	244	223	1.95	0	40	4	33400000	2	567.786	1134.56	0	1.08	29.35	9878	9878	MS2	0/0	0	0	hala.raw
High	A	2	FETLQAQAGK	6102	Unambiguous	Keratin, type II cytoskeletal 7 OS=Homo sapiens OX=9606 GN=KRT7 PE=1 SV=5 - [K2C7_HUMAN]	1	1	P08729		HCD	1	0	1	1	0.001	0.013	224	217	1.39	0	49	11	13400000	2	546.789	1092.57	0	1.64	29.35	9881	9881	MS2	0/0	0	0	hala.raw
High	A	2	SGQGAFGNMcR	6104	Unambiguous	60S ribosomal protein L4 OS=Homo sapiens OX=9606 GN=RPL4 PE=1 SV=5 - [RL4_HUMAN]	1	1	P36578	C10(Carbamidomethyl)	HCD	1	0	1	1	0	0.00149	34	29	1.57	0	63	10	9190000	2	592.751	1184.49	0	0.7	29.35	9882	9882	MS2	0/0	0	0	hala.raw
High	A	2	SQYEVMAEQNR	6108	Unambiguous	Keratin, type I cytoskeletal 19 OS=Homo sapiens OX=9606 GN=KRT19 PE=1 SV=4 - [K1C19_HUMAN]	1	1	P08727		HCD	1	0	1	1	0	0.00281	67	80	2.07	0	60	60	5150000	2	677.806	1354.6	0	-1.26	29.35	9884	9884	MS2	0/0	0	0	hala.raw
High	A	2	HQGVMVGMGQK	4226	Unambiguous	Actin, alpha cardiac muscle 1 OS=Homo sapiens OX=9606 GN=ACTC1 PE=1 SV=1 - [ACTC_HUMAN]|Beta-actin-like protein 2 OS=Homo sapiens OX=9606 GN=ACTBL2 PE=1 SV=2 - [ACTBL_HUMAN]|Actin, cytoplasmic 1 OS=Homo sapiens OX=9606 GN=ACTB PE=1 SV=1 - [ACTB_HUMAN]	7	3	P68032;Q562R1;P60709		HCD	1	0	1	1	0.006	0.0832	128	126	1.86	0	50	60	4960000	2	586.289	1171.57	0	-0.55	29.36	9885	9885	MS2	0/0	0	0	hala.raw
High	A	2	AFDQLR	5166	Unambiguous	Transketolase OS=Homo sapiens OX=9606 GN=TKT PE=1 SV=3 - [TKT_HUMAN]	2	1	P29401		HCD	1	0	1	1	0.005	0.0748	262	272	1.16	0	59	60	1570000	2	375.2	749.393	0	-0.83	29.36	9889	9889	MS2	0/0	0	0	hala.raw
High	A	2	AFDQIR	5166	Unambiguous	Transketolase OS=Homo sapiens OX=9606 GN=TKT PE=1 SV=3 - [TKT_HUMAN]	2	1	P29401		HCD	1	0	1	2	0.005	0.0748	262	272	1.16	0	59	60	1570000	2	375.2	749.393	0	-0.83	29.36	9889	9889	MS2	0/0	0	0	hala.raw
High	A	2	VIGSGcNLDSAR	5297	Unambiguous	L-lactate dehydrogenase B chain OS=Homo sapiens OX=9606 GN=LDHB PE=1 SV=2 - [LDHB_HUMAN]|L-lactate dehydrogenase A chain OS=Homo sapiens OX=9606 GN=LDHA PE=1 SV=2 - [LDHA_HUMAN]	4	2	P07195;P00338	C6(Carbamidomethyl)	HCD	1	0	1	1	0	5.94e-06	150	122	2.35	0	13	6	42200000	2	624.802	1248.6	0	-3.25	29.37	9892	9892	MS2	0/0	0	0	hala.raw
Middle	A	2	EVSTYIK	150	Unambiguous	Elongation factor 1-alpha 1 OS=Homo sapiens OX=9606 GN=EEF1A1 PE=1 SV=1 - [EF1A1_HUMAN]	2	1	P68104		HCD	1	0	1	1	0.036	0.382	125	142	1.03	0	15	15	13100000	2	420.229	839.451	0	0.34	29.37	9893	9893	MS2	0/0	0	0	hala.raw
High	A	2	NIIHGSDSVESAEK	4256	Unambiguous	Nucleoside diphosphate kinase A OS=Homo sapiens OX=9606 GN=NME1 PE=1 SV=1 - [NDKA_HUMAN]	1	1	P15531		HCD	1	0	1	1	0	0.000167	136	146	1.98	0	32	60	6650000	2	743.364	1485.72	0	1.82	29.37	9895	9895	MS2	0/0	0	0	hala.raw
High	A	2	HVVPNEVVVQR	6131	Unambiguous	Gelsolin OS=Homo sapiens OX=9606 GN=GSN PE=1 SV=1 - [GELS_HUMAN]	1	1	P06396		HCD	1	0	1	1	0	0.000251	181	164	1.74	0	57	60	6630000	2	638.362	1275.72	0	-0.48	29.38	9896	9896	MS2	0/0	0	0	hala.raw
High	A	2	DGQVINETSQHHDDLE	6133	Unambiguous	Vimentin OS=Homo sapiens OX=9606 GN=VIM PE=1 SV=4 - [VIME_HUMAN]	1	1	P08670		HCD	1	0	1	1	0.002	0.024	72	52	1.96	0	12	60	2310000	2	918.901	1836.79	0	-3.15	29.38	9897	9897	MS2	0/0	0	0	hala.raw
Middle	A	2	LPIEPR	6145	Unambiguous	ATP-dependent RNA helicase A OS=Homo sapiens OX=9606 GN=DHX9 PE=1 SV=4 - [DHX9_HUMAN]	1	1	Q08211		HCD	1	0	1	1	0.011	0.156	50	60	1.32	0	24	60	1990000	2	362.721	724.435	0	0.23	29.39	9905	9905	MS2	0/0	0	0	hala.raw
Middle	A	2	RPVDSYDIPK	6147	Unambiguous	LIM domain only protein 7 OS=Homo sapiens OX=9606 GN=LMO7 PE=1 SV=3 - [LMO7_HUMAN]	1	1	Q8WWI1		HCD	1	0	1	1	0.023	0.27	213	190	1.89	0	53	60	1830000	2	595.313	1189.62	0	-1.7	29.4	9906	9906	MS2	0/0	0	0	hala.raw
High	A	2	HTGPNSPDTANDGFVR	5021	Unambiguous	Heterogeneous nuclear ribonucleoprotein H2 OS=Homo sapiens OX=9606 GN=HNRNPH2 PE=1 SV=1 - [HNRH2_HUMAN]|Heterogeneous nuclear ribonucleoprotein H OS=Homo sapiens OX=9606 GN=HNRNPH1 PE=1 SV=4 - [HNRH1_HUMAN]	2	2	P55795;P31943		HCD	1	0	1	1	0	0.000127	98	98	2.13	0	43	60	4060000	2	842.887	1684.77	0	-0.34	29.4	9908	9908	MS2	0/0	0	0	hala.raw
High	A	2	EIAQDFK	4854	Unambiguous	Histone H3.1 OS=Homo sapiens OX=9606 GN=HIST1H3A PE=1 SV=2 - [H31_HUMAN]	4	1	P68431		HCD	1	0	1	1	0.008	0.124	134	162	1.23	0	12	4	50300000	2	425.719	850.431	0	0.48	29.4	9910	9910	MS2	0/0	0	0	hala.raw
High	A	2	EVATNSELVQSGK	4862	Unambiguous	Keratin, type I cytoskeletal 17 OS=Homo sapiens OX=9606 GN=KRT17 PE=1 SV=2 - [K1C17_HUMAN]	2	1	Q04695		HCD	1	0	1	1	0	1.91e-06	236	232	2.5	0	18	18	22000000	2	681.35	1361.69	0	1.23	29.41	9911	9911	MS2	0/0	0	0	hala.raw
High	A	2	EFHLNESGDPSSK	5816	Unambiguous	Protein SET OS=Homo sapiens OX=9606 GN=SET PE=1 SV=3 - [SET_HUMAN]	2	1	Q01105		HCD	1	0	1	1	0	0.00287	89	84	2.3	0	67	60	6940000	2	723.829	1446.65	0	0.23	29.41	9912	9912	MS2	0/0	0	0	hala.raw
High	A	2	INISEGNcPER	5425	Unambiguous	Poly(rC)-binding protein 1 OS=Homo sapiens OX=9606 GN=PCBP1 PE=1 SV=2 - [PCBP1_HUMAN]|Poly(rC)-binding protein 2 OS=Homo sapiens OX=9606 GN=PCBP2 PE=1 SV=1 - [PCBP2_HUMAN]	3	2	Q15365;Q15366	C8(Carbamidomethyl)	HCD	1	0	1	1	0	4.26e-05	96	90	2.39	0	43	60	5770000	2	644.801	1288.6	0	0.14	29.41	9914	9914	MS2	0/0	0	0	hala.raw
High	A	2	FNAHGDANTIVcNSK	5190	Unambiguous	Galectin-1 OS=Homo sapiens OX=9606 GN=LGALS1 PE=1 SV=2 - [LEG1_HUMAN]	1	1	P09382	C12(Carbamidomethyl)	HCD	1	0	1	1	0.005	0.0707	95	90	1.34	0	49	60	2050000	2	824.378	1647.75	0	-3.93	29.42	9915	9915	MS2	0/0	0	0	hala.raw
High	A	2	FcLDNGAK	6163	Unambiguous	Phosphoglycerate kinase 1 OS=Homo sapiens OX=9606 GN=PGK1 PE=1 SV=3 - [PGK1_HUMAN]	1	1	P00558	C2(Carbamidomethyl)	HCD	1	0	1	1	0.001	0.0138	95	88	1.4	0	31	7	16400000	2	462.715	924.423	0	-1.65	29.42	9917	9917	MS2	0/0	0	0	hala.raw
High	A	2	HEQNIDcGGGYVK	3439	Unambiguous	Calreticulin OS=Homo sapiens OX=9606 GN=CALR PE=1 SV=1 - [CALR_HUMAN]	1	1	P27797	C7(Carbamidomethyl)	HCD	1	0	1	1	0	3.76e-07	55	60	3.13	0	28	60	6200000	2	738.83	1476.65	0	-0.86	29.42	9919	9919	MS2	0/0	0	0	hala.raw
High	A	2	TANDMIHAENMR	6169	Unambiguous	Moesin OS=Homo sapiens OX=9606 GN=MSN PE=1 SV=3 - [MOES_HUMAN]	1	1	P26038		HCD	1	0	1	1	0	2.81e-06	54	63	2.69	0	59	60	4810000	2	701.812	1402.62	0	-2.6	29.43	9920	9920	MS2	0/0	0	0	hala.raw
High	A	2	SSQSSSQQFSGIGR	6173	Unambiguous	Probable ATP-dependent RNA helicase DDX17 OS=Homo sapiens OX=9606 GN=DDX17 PE=1 SV=2 - [DDX17_HUMAN]	1	1	Q92841		HCD	1	0	1	1	0	6.24e-06	114	116	2.65	0	22	60	4360000	2	728.345	1455.68	0	0.16	29.43	9922	9922	MS2	0/0	0	0	hala.raw
High	A	2	IKDPDASKPEDWDER	5754	Unambiguous	Calreticulin OS=Homo sapiens OX=9606 GN=CALR PE=1 SV=1 - [CALR_HUMAN]	1	1	P27797		HCD	1	0	1	1	0	0.00139	141	143	2.07	1	69	60	2850000	2	900.924	1800.84	0	-0.05	29.43	9923	9923	MS2	0/0	0	0	hala.raw
High	A	2	TANDMIHAENMR	6169	Unambiguous	Moesin OS=Homo sapiens OX=9606 GN=MSN PE=1 SV=3 - [MOES_HUMAN]	1	1	P26038		HCD	1	0	1	1	0	0.000666	65	62	1.69	0	43	24	9000000	3	468.212	1402.62	0	0.92	29.44	9929	9929	MS2	0/0	0	0	hala.raw
High	A	2	VLIAAHGNSLR	6188	Unambiguous	Phosphoglycerate mutase 1 OS=Homo sapiens OX=9606 GN=PGAM1 PE=1 SV=2 - [PGAM1_HUMAN]	2	1	P18669		HCD	1	0	1	1	0.001	0.0177	122	113	2.04	0	39	28	6940000	3	384.228	1150.67	0	0.07	29.44	9930	9930	MS2	0/0	0	0	hala.raw
High	A	2	ADGYVLEGK	6192	Unambiguous	40S ribosomal protein S8 OS=Homo sapiens OX=9606 GN=RPS8 PE=1 SV=2 - [RS8_HUMAN]	1	1	P62241		HCD	1	0	1	1	0.003	0.0347	146	145	1.54	0	28	31	6490000	2	476.243	951.479	0	1.12	29.45	9932	9932	MS2	0/0	0	0	hala.raw
High	A	2	QEYDESGPSIVHR	5898	Unambiguous	Actin, cytoplasmic 1 OS=Homo sapiens OX=9606 GN=ACTB PE=1 SV=1 - [ACTB_HUMAN]	7	1	P60709		HCD	1	0	1	1	0	3.86e-06	90	103	2.56	0	2	2	128000000	3	506.24	1516.7	0	1.12	29.45	9934	9934	MS2	0/0	0	0	hala.raw
High	A	2	NNASTDYDLSDK	5349	Unambiguous	60S ribosomal protein L3 OS=Homo sapiens OX=9606 GN=RPL3 PE=1 SV=2 - [RL3_HUMAN]	1	1	P39023		HCD	1	0	1	1	0	0.000878	29	27	1.59	0	58	60	4000000	2	671.791	1342.57	0	-1.21	29.46	9936	9936	MS2	0/0	0	0	hala.raw
High	A	2	NNASTDYDLSDK	5349	Unambiguous	60S ribosomal protein L3 OS=Homo sapiens OX=9606 GN=RPL3 PE=1 SV=2 - [RL3_HUMAN]	1	1	P39023		HCD	1	0	1	1	0	0.000417	29	27	1.62	0	58	60	4000000	2	671.791	1342.57	0	-1.21	29.46	9938	9938	MS2	0/0	0	0	hala.raw
High	A	2	AAEAAAAPAESAAPAAGEEPSKEEGEPK	5053	Unambiguous	Brain acid soluble protein 1 OS=Homo sapiens OX=9606 GN=BASP1 PE=1 SV=2 - [BASP1_HUMAN]	1	1	P80723		HCD	1	0	1	1	0.002	0.0248	120	106	1.96	1	16	60	1600000	3	879.415	2636.23	0	-0.83	29.47	9942	9942	MS2	0/0	0	0	hala.raw
High	A	2	cAADLGLNK	6210	Unambiguous	Histidine triad nucleotide-binding protein 1 OS=Homo sapiens OX=9606 GN=HINT1 PE=1 SV=2 - [HINT1_HUMAN]	1	1	P49773	C1(Carbamidomethyl)	HCD	1	0	1	1	0	0.00121	185	182	1.82	0	30	13	9460000	2	481.243	961.478	0	0.72	29.47	9943	9943	MS2	0/0	0	0	hala.raw
High	A	2	MREDYDSVEQDGDEPGPQR	6217	Unambiguous	RNA-binding protein 8A OS=Homo sapiens OX=9606 GN=RBM8A PE=1 SV=1 - [RBM8A_HUMAN]	1	1	Q9Y5S9		HCD	1	0	1	1	0	0.00929	21	13	1.61	1	0	60	991000	2	1111.96	2222.92	0	-1.43	29.47	9946	9946	MS2	0/0	0	0	hala.raw
High	A	2	AGFAGDDAPR	3795	Unambiguous	Actin, alpha cardiac muscle 1 OS=Homo sapiens OX=9606 GN=ACTC1 PE=1 SV=1 - [ACTC_HUMAN]|Actin, cytoplasmic 1 OS=Homo sapiens OX=9606 GN=ACTB PE=1 SV=1 - [ACTB_HUMAN]	10	2	P68032;P60709		HCD	1	0	1	1	0	0.000179	78	86	1.87	0	16	3	58600000	2	488.728	976.449	0	0.87	29.48	9948	9948	MS2	0/0	0	0	hala.raw
High	A	2	SPPPGMGLNQNR	5794	Unambiguous	Splicing factor, proline- and glutamine-rich OS=Homo sapiens OX=9606 GN=SFPQ PE=1 SV=2 - [SFPQ_HUMAN]	1	1	P23246		HCD	1	0	1	1	0	0.000321	148	160	1.68	0	20	60	7520000	2	634.314	1267.62	0	-0.28	29.48	9949	9949	MS2	0/0	0	0	hala.raw
High	A	2	HVVFIAQR	6223	Unambiguous	40S ribosomal protein S7 OS=Homo sapiens OX=9606 GN=RPS7 PE=1 SV=1 - [RS7_HUMAN]	1	1	P62081		HCD	1	0	1	1	0	0.00346	113	89	1.86	0	38	8	19200000	2	485.285	969.563	0	0.33	29.48	9950	9950	MS2	0/0	0	0	hala.raw
High	A	2	LLADQAEAR	5158	Unambiguous	60S ribosomal protein L19 OS=Homo sapiens OX=9606 GN=RPL19 PE=1 SV=1 - [RL19_HUMAN]	1	1	P84098		HCD	1	0	1	1	0	0.00502	130	147	1.47	0	48	10	7350000	2	493.767	986.527	0	0.25	29.49	9951	9951	MS2	0/0	0	0	hala.raw
High	A	2	YKPLDLRPK	6227	Unambiguous	60S ribosomal protein L35 OS=Homo sapiens OX=9606 GN=RPL35 PE=1 SV=2 - [RL35_HUMAN]	1	1	P42766		HCD	1	0	1	1	0.003	0.0409	130	134	1.41	0	44	60	4080000	3	377.229	1129.67	0	-0.1	29.49	9952	9952	MS2	0/0	0	0	hala.raw
High	A	2	NMMAAcDPR	4343	Unambiguous	Tubulin beta-2A chain OS=Homo sapiens OX=9606 GN=TUBB2A PE=1 SV=1 - [TBB2A_HUMAN]|Tubulin beta-3 chain OS=Homo sapiens OX=9606 GN=TUBB3 PE=1 SV=2 - [TBB3_HUMAN]|Tubulin beta-4A chain OS=Homo sapiens OX=9606 GN=TUBB4A PE=1 SV=2 - [TBB4A_HUMAN]|Tubulin beta-4B chain OS=Homo sapiens OX=9606 GN=TUBB4B PE=1 SV=1 - [TBB4B_HUMAN]|Tubulin beta chain OS=Homo sapiens OX=9606 GN=TUBB PE=1 SV=2 - [TBB5_HUMAN…	9	3	P68371;P07437;Q9BUF5	C6(Carbamidomethyl)	HCD	1	0	1	1	0.005	0.0639	14	13	1.53	0	38	20	13700000	2	533.217	1065.43	0	0.15	29.49	9955	9955	MS2	0/0	0	0	hala.raw
High	A	2	SNVSDAVAQSTR	4643	Unambiguous	Triosephosphate isomerase OS=Homo sapiens OX=9606 GN=TPI1 PE=1 SV=3 - [TPIS_HUMAN]	1	1	P60174		HCD	1	0	1	1	0	0.000229	162	166	2.04	0	43	8	12000000	2	617.805	1234.6	0	0.95	29.5	9957	9957	MS2	0/0	0	0	hala.raw
High	A	2	IIAPPER	4510	Unambiguous	Actin, alpha cardiac muscle 1 OS=Homo sapiens OX=9606 GN=ACTC1 PE=1 SV=1 - [ACTC_HUMAN]|Beta-actin-like protein 2 OS=Homo sapiens OX=9606 GN=ACTBL2 PE=1 SV=2 - [ACTBL_HUMAN]|Actin, cytoplasmic 1 OS=Homo sapiens OX=9606 GN=ACTB PE=1 SV=1 - [ACTB_HUMAN]	7	3	P68032;Q562R1;P60709		HCD	1	0	1	1	0.004	0.0552	61	60	1.6	0	14	5	32100000	2	398.24	795.473	0	0.43	29.51	9960	9960	MS2	0/0	0	0	hala.raw
High	A	2	EDMAALEK	5401	Unambiguous	Tubulin alpha-1A chain OS=Homo sapiens OX=9606 GN=TUBA1A PE=1 SV=1 - [TBA1A_HUMAN]|Tubulin alpha-1B chain OS=Homo sapiens OX=9606 GN=TUBA1B PE=1 SV=1 - [TBA1B_HUMAN]|Tubulin alpha-1C chain OS=Homo sapiens OX=9606 GN=TUBA1C PE=1 SV=1 - [TBA1C_HUMAN]|Tubulin alpha-4A chain OS=Homo sapiens OX=9606 GN=TUBA4A PE=1 SV=1 - [TBA4A_HUMAN]	4	2	Q9BQE3;P68366		HCD	1	0	1	1	0.001	0.0139	89	92	1.55	0	34	9	14000000	2	453.716	906.425	0	1.46	29.51	9962	9962	MS2	0/0	0	0	hala.raw
High	A	2	LNFSHGTHEYHAETIK	5031	Unambiguous	Pyruvate kinase PKM OS=Homo sapiens OX=9606 GN=PKM PE=1 SV=4 - [KPYM_HUMAN]	1	1	P14618		HCD	1	0	1	1	0	0.000178	168	188	2.25	0	19	60	5930000	3	628.639	1883.9	0	0.07	29.52	9963	9963	MS2	0/0	0	0	hala.raw
High	A	2	EFTEAVEAK	6245	Unambiguous	Prohibitin OS=Homo sapiens OX=9606 GN=PHB PE=1 SV=1 - [PHB_HUMAN]	1	1	P35232		HCD	1	0	1	1	0	0.00974	138	144	1.56	0	58	60	2400000	2	512.253	1023.5	0	-0.65	29.52	9964	9964	MS2	0/0	0	0	hala.raw
High	A	2	VDNDENEHQLSLR	5397	Unambiguous	Nucleophosmin OS=Homo sapiens OX=9606 GN=NPM1 PE=1 SV=2 - [NPM_HUMAN]	1	1	P06748		HCD	1	0	1	1	0	6.01e-06	146	115	2.72	0	25	51	12900000	2	784.869	1568.73	0	0.72	29.53	9968	9968	MS2	0/0	0	0	hala.raw
Middle	A	2	MPSGEFAR	5403	Unambiguous	Proliferating cell nuclear antigen OS=Homo sapiens OX=9606 GN=PCNA PE=1 SV=1 - [PCNA_HUMAN]	1	1	P12004		HCD	1	0	1	1	0.017	0.22	106	85	1.13	0	68	19	3340000	2	447.71	894.413	0	-1.3	29.53	9969	9969	MS2	0/0	0	0	hala.raw
High	A	2	VVGDVAYDEAK	6255	Unambiguous	C-1-tetrahydrofolate synthase, cytoplasmic OS=Homo sapiens OX=9606 GN=MTHFD1 PE=1 SV=3 - [C1TC_HUMAN]	1	1	P11586		HCD	1	0	1	1	0	0.000174	212	221	2.21	0	48	60	7290000	2	583.292	1165.58	0	3.5	29.53	9970	9970	MS2	0/0	0	0	hala.raw
High	A	2	cYEMASHLR	4981	Unambiguous	Profilin-1 OS=Homo sapiens OX=9606 GN=PFN1 PE=1 SV=2 - [PROF1_HUMAN]	1	1	P07737	C1(Carbamidomethyl)	HCD	1	0	1	1	0	0.00019	67	61	2.05	0	35	49	6190000	3	389.508	1166.51	0	0.38	29.53	9971	9971	MS2	0/0	0	0	hala.raw
High	A	2	RPAEDMEEEQAFK	6259	Unambiguous	Heterogeneous nuclear ribonucleoprotein K OS=Homo sapiens OX=9606 GN=HNRNPK PE=1 SV=1 - [HNRPK_HUMAN]	1	1	P61978		HCD	1	0	1	1	0	2.96e-05	63	54	2.82	0	24	60	4980000	2	790.355	1579.7	0	-1.43	29.53	9972	9972	MS2	0/0	0	0	hala.raw
High	A	2	LQDAEIAR	4069	Unambiguous	Protein S100-A6 OS=Homo sapiens OX=9606 GN=S100A6 PE=1 SV=1 - [S10A6_HUMAN]	1	1	P06703		HCD	1	0	1	1	0	0.00443	140	151	1.36	0	49	10	8810000	2	458.249	915.49	0	0.69	29.54	9975	9975	MS2	0/0	0	0	hala.raw
High	A	2	YTcSFcGK	3898	Unambiguous	60S ribosomal protein L37a OS=Homo sapiens OX=9606 GN=RPL37A PE=1 SV=2 - [RL37A_HUMAN]	2	1	P61513	C3(Carbamidomethyl); C6(Carbamidomethyl)	HCD	1	0	1	1	0.004	0.0525	18	9	1.22	0	65	60	2370000	2	511.707	1022.41	0	0.11	29.54	9976	9976	MS2	0/0	0	0	hala.raw
Middle	A	2	HSGPNSADSANDGFVR	3868	Unambiguous	Heterogeneous nuclear ribonucleoprotein F OS=Homo sapiens OX=9606 GN=HNRNPF PE=1 SV=3 - [HNRPF_HUMAN]	1	1	P52597		HCD	1	0	1	1	0.01	0.139	40	45	1.62	0	34	60	1880000	2	815.861	1630.71	0	-3.6	29.54	9977	9977	MS2	0/0	0	0	hala.raw
High	A	2	LIPDGcGVK	6269	Unambiguous	60S ribosomal protein L10 OS=Homo sapiens OX=9606 GN=RPL10 PE=1 SV=4 - [RL10_HUMAN]	1	1	P27635	C6(Carbamidomethyl)	HCD	1	0	1	1	0.002	0.0272	163	165	1.27	0	52	8	8860000	2	479.756	958.505	0	2.47	29.54	9978	9978	MS2	0/0	0	0	hala.raw
High	A	2	STAGDTHLGGEDFDNR	6272	Unambiguous	Heat shock cognate 71 kDa protein OS=Homo sapiens OX=9606 GN=HSPA8 PE=1 SV=1 - [HSP7C_HUMAN]	2	1	P11142		HCD	1	0	1	2	0.007	0.0931	45	41	1.13	0	46	60	2000000	2	846.369	1691.73	0	2.51	29.55	9979	9979	MS2	0/0	0	0	hala.raw
High	A	2	GTVEPQLEAR	6277	Unambiguous	Filamin-A OS=Homo sapiens OX=9606 GN=FLNA PE=1 SV=4 - [FLNA_HUMAN]	1	1	P21333		HCD	1	0	1	1	0	0.000776	151	178	1.93	0	39	20	12600000	2	550.291	1099.58	0	0.77	29.56	9983	9983	MS2	0/0	0	0	hala.raw
High	A	2	LDPITGR	6279	Unambiguous	Heterogeneous nuclear ribonucleoprotein D0 OS=Homo sapiens OX=9606 GN=HNRNPD PE=1 SV=1 - [HNRPD_HUMAN]	1	1	Q14103		HCD	1	0	1	1	0.003	0.0366	108	87	1.61	0	34	37	5410000	2	386.222	771.436	0	0.07	29.56	9984	9984	MS2	0/0	0	0	hala.raw
High	A	2	VDNDENEHQLSLR	5397	Unambiguous	Nucleophosmin OS=Homo sapiens OX=9606 GN=NPM1 PE=1 SV=2 - [NPM_HUMAN]	1	1	P06748		HCD	1	0	1	1	0	0.00134	147	117	2.01	0	43	10	27800000	3	523.582	1568.73	0	0.05	29.56	9986	9986	MS2	0/0	0	0	hala.raw
High	A	2	YQEGGVESAFHK	6285	Unambiguous	Macrophage-capping protein OS=Homo sapiens OX=9606 GN=CAPG PE=1 SV=2 - [CAPG_HUMAN]	1	1	P40121		HCD	1	0	1	1	0	0.000681	107	116	1.72	0	55	60	1820000	2	676.318	1351.63	0	1.34	29.57	9988	9988	MS2	0/0	0	0	hala.raw
High	A	2	LAQFEPSQR	6287	Unambiguous	ATP-dependent RNA helicase A OS=Homo sapiens OX=9606 GN=DHX9 PE=1 SV=4 - [DHX9_HUMAN]	1	1	Q08211		HCD	1	0	1	1	0.004	0.0571	209	202	1.14	0	34	6	19300000	2	538.279	1075.55	0	-2.82	29.57	9990	9990	MS2	0/0	0	0	hala.raw
High	A	2	VVGcScVVVK	6289	Unambiguous	40S ribosomal protein S12 OS=Homo sapiens OX=9606 GN=RPS12 PE=1 SV=3 - [RS12_HUMAN]	1	1	P25398	C4(Carbamidomethyl); C6(Carbamidomethyl)	HCD	1	0	1	1	0	0.00699	204	202	1.68	0	40	29	10100000	2	553.789	1106.57	0	0.58	29.57	9991	9991	MS2	0/0	0	0	hala.raw
High	A	2	VSDATGQMNLTK	6295	Unambiguous	Macrophage-capping protein OS=Homo sapiens OX=9606 GN=CAPG PE=1 SV=2 - [CAPG_HUMAN]	1	1	P40121		HCD	1	0	1	1	0	0.000172	166	162	2.09	0	35	60	6430000	2	632.811	1264.62	0	-4.11	29.58	9994	9994	MS2	0/0	0	0	hala.raw
High	A	2	HELQANcYEEVK	4712	Unambiguous	Cofilin-1 OS=Homo sapiens OX=9606 GN=CFL1 PE=1 SV=3 - [COF1_HUMAN]	1	1	P23528	C7(Carbamidomethyl)	HCD	1	0	1	1	0	0.000957	75	61	2.91	0	27	60	7590000	2	760.346	1519.68	0	-0.24	29.58	9997	9997	MS2	0/0	0	0	hala.raw
High	A	2	VVGcScVVVK	6289	Unambiguous	40S ribosomal protein S12 OS=Homo sapiens OX=9606 GN=RPS12 PE=1 SV=3 - [RS12_HUMAN]	1	1	P25398	C4(Carbamidomethyl); C6(Carbamidomethyl)	HCD	1	0	1	1	0.006	0.088	204	202	1.87	0	40	29	10100000	2	553.789	1106.57	0	0.58	29.59	9998	9998	MS2	0/0	0	0	hala.raw
High	A	2	AAEAAAAPAESAAPAAGEEPSK	5029	Unambiguous	Brain acid soluble protein 1 OS=Homo sapiens OX=9606 GN=BASP1 PE=1 SV=2 - [BASP1_HUMAN]	1	1	P80723		HCD	1	0	1	1	0	0.00163	142	146	1.95	0	44	60	2260000	2	983.975	1966.94	0	3.34	29.6	10002	10002	MS2	0/0	0	0	hala.raw
Middle	A	2	FTIDTK	6314	Unambiguous	Filamin-A OS=Homo sapiens OX=9606 GN=FLNA PE=1 SV=4 - [FLNA_HUMAN]	1	1	P21333		HCD	1	0	1	1	0.036	0.376	90	98	1.15	0	47	60	2640000	2	362.697	724.387	0	-0.24	29.6	10004	10004	MS2	0/0	0	0	hala.raw
High	A	2	LEcVEPNcR	3801	Unambiguous	60S ribosomal protein L36a OS=Homo sapiens OX=9606 GN=RPL36A PE=1 SV=2 - [RL36A_HUMAN]	2	1	P83881	C3(Carbamidomethyl); C8(Carbamidomethyl)	HCD	1	0	1	1	0	0.00941	46	46	1.58	0	72	17	5620000	2	588.76	1176.51	0	-0.16	29.6	10007	10007	MS2	0/0	0	0	hala.raw
Middle	A	2	YRPGTVALR	4616	Unambiguous	Histone H3.1 OS=Homo sapiens OX=9606 GN=HIST1H3A PE=1 SV=2 - [H31_HUMAN]	5	1	P68431		HCD	1	0	1	1	0.01	0.14	148	158	1.49	0	13	2	102000000	2	516.801	1032.6	0	0.44	29.61	10009	10009	MS2	0/0	0	0	hala.raw
High	A	2	APEQEQAAPGPAAGGEAPK	3410	Unambiguous	Brain acid soluble protein 1 OS=Homo sapiens OX=9606 GN=BASP1 PE=1 SV=2 - [BASP1_HUMAN]	1	1	P80723		HCD	1	0	1	1	0	2.49e-05	188	162	3.3	0	42	60	4340000	2	888.431	1775.85	0	-1.22	29.62	10012	10012	MS2	0/0	0	0	hala.raw
High	A	2	IDIVENR	6328	Unambiguous	Argininosuccinate synthase OS=Homo sapiens OX=9606 GN=ASS1 PE=1 SV=2 - [ASSY_HUMAN]	1	1	P00966		HCD	1	0	1	1	0	0.00863	176	182	1.84	0	26	11	16400000	2	429.738	858.468	0	0.5	29.62	10013	10013	MS2	0/0	0	0	hala.raw
High	A	2	TNRPPLSLSR	6291	Unambiguous	60S ribosomal protein L18 OS=Homo sapiens OX=9606 GN=RPL18 PE=1 SV=2 - [RL18_HUMAN]	1	1	Q07020		HCD	1	0	1	1	0.003	0.0465	111	116	2.3	0	43	19	14600000	2	570.828	1140.65	0	-0.17	29.62	10015	10015	MS2	0/0	0	0	hala.raw
High	A	2	MQVDQEEPHVEEQQQQTPAENK	6336	Unambiguous	Heat shock 70 kDa protein 4 OS=Homo sapiens OX=9606 GN=HSPA4 PE=1 SV=4 - [HSP74_HUMAN]	1	1	P34932		HCD	1	0	1	1	0	0.000145	75	63	1.25	0	14	60	3340000	3	874.73	2622.17	0	0.34	29.63	10018	10018	MS2	0/0	0	0	hala.raw
High	A	2	GDATVSYEDPPTAK	6338	Unambiguous	RNA-binding protein EWS OS=Homo sapiens OX=9606 GN=EWSR1 PE=1 SV=1 - [EWS_HUMAN]	1	1	Q01844		HCD	1	0	1	1	0	5.44e-05	93	83	2.4	0	46	60	5130000	2	725.836	1450.67	0	-3.09	29.63	10019	10019	MS2	0/0	0	0	hala.raw
High	A	2	LNLVQR	6342	Unambiguous	L-lactate dehydrogenase B chain OS=Homo sapiens OX=9606 GN=LDHB PE=1 SV=2 - [LDHB_HUMAN]|L-lactate dehydrogenase A chain OS=Homo sapiens OX=9606 GN=LDHA PE=1 SV=2 - [LDHA_HUMAN]	3	2	P07195;P00338		HCD	1	0	1	1	0.006	0.0809	81	79	1.92	0	66	60	2950000	2	371.732	742.457	0	-0.43	29.63	10021	10021	MS2	0/0	0	0	hala.raw
High	A	2	ASLENSLR	6344	Unambiguous	Keratin, type I cytoskeletal 18 OS=Homo sapiens OX=9606 GN=KRT18 PE=1 SV=2 - [K1C18_HUMAN]	1	1	P05783		HCD	1	0	1	1	0	0.00778	247	275	1.52	0	50	10	9930000	2	445.24	889.474	0	-0.22	29.64	10023	10023	MS2	0/0	0	0	hala.raw
High	A	2	GIPHLVTHDAR	4697	Unambiguous	40S ribosomal protein S4, X isoform OS=Homo sapiens OX=9606 GN=RPS4X PE=1 SV=2 - [RS4X_HUMAN]	3	1	P62701		HCD	1	0	1	1	0.006	0.0851	251	260	1.31	0	46	54	2550000	3	405.892	1215.66	0	1.81	29.64	10025	10025	MS2	0/0	0	0	hala.raw
High	A	2	QAASGLVGQENAR	4939	Unambiguous	RuvB-like 1 OS=Homo sapiens OX=9606 GN=RUVBL1 PE=1 SV=1 - [RUVB1_HUMAN]	1	1	Q9Y265		HCD	1	0	1	1	0.001	0.0176	177	189	1.68	0	78	60	1210000	2	650.838	1300.67	0	6.27	29.65	10029	10029	MS2	0/0	0	0	hala.raw
High	A	2	YESLTDPSK	4512	Unambiguous	Heat shock protein HSP 90-beta OS=Homo sapiens OX=9606 GN=HSP90AB1 PE=1 SV=4 - [HS90B_HUMAN]|Heat shock protein HSP 90-alpha OS=Homo sapiens OX=9606 GN=HSP90AA1 PE=1 SV=5 - [HS90A_HUMAN]|Putative heat shock protein HSP 90-beta 4 OS=Homo sapiens OX=9606 GN=HSP90AB4P PE=5 SV=1 - [H90B4_HUMAN]	5	2	P08238;P07900		HCD	1	0	1	1	0	0.00396	107	112	1.68	0	44	18	7600000	2	520.25	1039.49	0	-1.6	29.66	10031	10031	MS2	0/0	0	0	hala.raw
High	A	2	SVTEQGAELSNEER	5101	Unambiguous	14-3-3 protein zeta/delta OS=Homo sapiens OX=9606 GN=YWHAZ PE=1 SV=1 - [1433Z_HUMAN]	1	1	P63104		HCD	1	0	1	1	0	3.65e-07	111	94	2.74	0	30	56	7610000	2	774.859	1548.71	0	-1.35	29.67	10034	10034	MS2	0/0	0	0	hala.raw
High	A	2	AQYDELAR	5505	Unambiguous	Keratin, type I cytoskeletal 18 OS=Homo sapiens OX=9606 GN=KRT18 PE=1 SV=2 - [K1C18_HUMAN]	1	1	P05783		HCD	1	0	1	1	0.002	0.0288	166	166	1.46	0	55	22	6530000	2	483.238	965.469	0	0.33	29.67	10035	10035	MS2	0/0	0	0	hala.raw
Middle	A	2	FLEEATR	5617	Unambiguous	Carbamoyl-phosphate synthase [ammonia], mitochondrial OS=Homo sapiens OX=9606 GN=CPS1 PE=1 SV=2 - [CPSM_HUMAN]	1	1	P31327		HCD	1	0	1	1	0.021	0.25	186	187	1.26	0	50	27	2300000	2	433.224	865.441	0	-0.56	29.67	10037	10037	MS2	0/0	0	0	hala.raw
High	A	2	SSGSPYGGGYGSGGGSGGYGSR	4915	Unambiguous	Heterogeneous nuclear ribonucleoprotein A3 OS=Homo sapiens OX=9606 GN=HNRNPA3 PE=1 SV=2 - [ROA3_HUMAN]	1	1	P51991		HCD	1	0	1	1	0	1.01e-05	27	29	1.83	0	0	60	870000	2	955.898	1910.79	0	-0.68	29.68	10038	10038	MS2	0/0	0	0	hala.raw
High	A	2	STAGDTHLGGEDFDNR	6272	Unambiguous	Heat shock cognate 71 kDa protein OS=Homo sapiens OX=9606 GN=HSPA8 PE=1 SV=1 - [HSP7C_HUMAN]	2	1	P11142		HCD	1	0	1	1	0	0.00692	37	34	1.34	0	34	8	28100000	3	564.58	1691.73	0	0.23	29.68	10040	10040	MS2	0/0	0	0	hala.raw
High	A	2	TPAQYDASELK	6372	Unambiguous	Annexin A2 OS=Homo sapiens OX=9606 GN=ANXA2 PE=1 SV=2 - [ANXA2_HUMAN]	2	1	P07355		HCD	1	0	1	1	0	2.62e-06	185	182	2.61	0	47	12	11700000	2	611.802	1222.6	0	1.07	29.68	10041	10041	MS2	0/0	0	0	hala.raw
High	A	2	IFAPNHVVAK	6374	Unambiguous	60S ribosomal protein L18a OS=Homo sapiens OX=9606 GN=RPL18A PE=1 SV=2 - [RL18A_HUMAN]	1	1	Q02543		HCD	1	0	1	1	0.007	0.098	103	86	1.47	0	39	26	4450000	3	365.882	1095.63	0	0.3	29.68	10042	10042	MS2	0/0	0	0	hala.raw
Middle	A	2	EIFDSR	5463	Unambiguous	Alpha-enolase OS=Homo sapiens OX=9606 GN=ENO1 PE=1 SV=2 - [ENOA_HUMAN]	1	1	P06733		HCD	1	0	1	1	0.023	0.27	99	125	1.22	0	57	33	3720000	2	383.691	766.374	0	0.96	29.68	10043	10043	MS2	0/0	0	0	hala.raw
High	A	2	AQTAHIVLEDGTK	6378	Unambiguous	Carbamoyl-phosphate synthase [ammonia], mitochondrial OS=Homo sapiens OX=9606 GN=CPS1 PE=1 SV=2 - [CPSM_HUMAN]	1	1	P31327		HCD	1	0	1	1	0	3.17e-05	194	202	2.91	0	22	30	8580000	2	691.867	1382.73	0	-0.19	29.68	10044	10044	MS2	0/0	0	0	hala.raw
High	A	2	IGAEVYHNLK	6384	Unambiguous	Alpha-enolase OS=Homo sapiens OX=9606 GN=ENO1 PE=1 SV=2 - [ENOA_HUMAN]	1	1	P06733		HCD	1	0	1	1	0.001	0.0165	219	226	1.75	0	24	13	20000000	3	381.877	1143.62	0	0.51	29.7	10049	10049	MS2	0/0	0	0	hala.raw
High	A	2	DLEGSDIDTR	6386	Unambiguous	Exportin-2 OS=Homo sapiens OX=9606 GN=CSE1L PE=1 SV=3 - [XPO2_HUMAN]	1	1	P55060		HCD	1	0	1	1	0	0.00158	88	111	1.67	0	53	11	4790000	2	560.761	1120.51	0	2.1	29.7	10050	10050	MS2	0/0	0	0	hala.raw
Middle	A	2	VLNTNIDGR	5962	Unambiguous	40S ribosomal protein S18 OS=Homo sapiens OX=9606 GN=RPS18 PE=1 SV=3 - [RS18_HUMAN]	1	1	P62269		HCD	1	0	1	2	0.018	0.227	182	183	0.92	0	45	8	5520000	2	501.272	1001.54	0	0.22	29.7	10051	10051	MS2	0/0	0	0	hala.raw
High	A	2	EESDDEAAVEEEEEEK	5960	Unambiguous	Endoplasmin OS=Homo sapiens OX=9606 GN=HSP90B1 PE=1 SV=1 - [ENPL_HUMAN]	1	1	P14625		HCD	1	0	1	1	0	0.00953	6	7	1.46	0	12	60	751000	2	933.866	1866.72	0	-0.01	29.71	10054	10054	MS2	0/0	0	0	hala.raw
High	A	2	ScVEEPEPEPEAAEGDGDK	6399	Unambiguous	Hepatoma-derived growth factor OS=Homo sapiens OX=9606 GN=HDGF PE=1 SV=1 - [HDGF_HUMAN]	1	1	P51858	C2(Carbamidomethyl)	HCD	1	0	1	1	0	9.26e-05	14	15	2.39	0	12	60	1520000	2	1022.92	2044.83	0	-0.54	29.71	10057	10057	MS2	0/0	0	0	hala.raw
High	A	2	LSVDYGK	5156	Unambiguous	Tubulin alpha-1A chain OS=Homo sapiens OX=9606 GN=TUBA1A PE=1 SV=1 - [TBA1A_HUMAN]|Tubulin alpha-1B chain OS=Homo sapiens OX=9606 GN=TUBA1B PE=1 SV=1 - [TBA1B_HUMAN]|Tubulin alpha-1C chain OS=Homo sapiens OX=9606 GN=TUBA1C PE=1 SV=1 - [TBA1C_HUMAN]|Tubulin alpha-4A chain OS=Homo sapiens OX=9606 GN=TUBA4A PE=1 SV=1 - [TBA4A_HUMAN]	5	2	Q9BQE3;P68366		HCD	1	0	1	1	0.005	0.0709	132	140	1.32	0	12	36	6070000	2	391.209	781.41	0	0.9	29.72	10062	10062	MS2	0/0	0	0	hala.raw
High	A	2	cYEMASHLR	4981	Unambiguous	Profilin-1 OS=Homo sapiens OX=9606 GN=PFN1 PE=1 SV=2 - [PROF1_HUMAN]	1	1	P07737	C1(Carbamidomethyl)	HCD	1	0	1	1	0	0.00161	67	61	2.01	0	55	60	6420000	2	583.758	1166.51	0	0.68	29.73	10065	10065	MS2	0/0	0	0	hala.raw
High	A	2	DSYVGDEAQSK	2007	Unambiguous	Actin, alpha cardiac muscle 1 OS=Homo sapiens OX=9606 GN=ACTC1 PE=1 SV=1 - [ACTC_HUMAN]|Actin, cytoplasmic 1 OS=Homo sapiens OX=9606 GN=ACTB PE=1 SV=1 - [ACTB_HUMAN]	6	2	P68032;P60709		HCD	1	0	1	1	0	0.00365	59	56	1.5	0	39	17	10800000	2	599.766	1198.52	0	1.92	29.74	10069	10069	MS2	0/0	0	0	hala.raw
High	A	2	NSNPALNDNLEK	6420	Unambiguous	Chloride intracellular channel protein 1 OS=Homo sapiens OX=9606 GN=CLIC1 PE=1 SV=4 - [CLIC1_HUMAN]	1	1	O00299		HCD	1	0	1	1	0	0.000866	132	151	2.15	0	9	52	9900000	2	664.826	1328.64	0	0.6	29.74	10070	10070	MS2	0/0	0	0	hala.raw
High	A	2	LQSIGTENTEENR	4724	Unambiguous	Fructose-bisphosphate aldolase A OS=Homo sapiens OX=9606 GN=ALDOA PE=1 SV=2 - [ALDOA_HUMAN]	1	1	P04075		HCD	1	0	1	1	0	4.71e-07	150	141	3.23	0	59	60	7390000	2	745.858	1490.71	0	0.88	29.75	10071	10071	MS2	0/0	0	0	hala.raw
High	A	2	ALQAQEIEcR	6424	Unambiguous	Procollagen galactosyltransferase 1 OS=Homo sapiens OX=9606 GN=COLGALT1 PE=1 SV=1 - [GT251_HUMAN]	1	1	Q8NBJ5	C9(Carbamidomethyl)	HCD	1	0	1	1	0	0.00296	146	162	1.82	0	27	32	11400000	2	609.303	1217.6	0	3.65	29.75	10072	10072	MS2	0/0	0	0	hala.raw
High	A	2	IIEDQQESLNK	4649	Unambiguous	Lupus La protein OS=Homo sapiens OX=9606 GN=SSB PE=1 SV=2 - [LA_HUMAN]	1	1	P05455		HCD	1	0	1	1	0.009	0.136	194	179	1.24	0	37	60	2410000	2	658.836	1316.66	0	-3.84	29.76	10076	10076	MS2	0/0	0	0	hala.raw
High	A	2	AYTNFDAER	6443	Unambiguous	Annexin A2 OS=Homo sapiens OX=9606 GN=ANXA2 PE=1 SV=2 - [ANXA2_HUMAN]	2	1	P07355		HCD	1	0	1	1	0	0.00229	61	58	1.85	0	26	4	47400000	2	543.747	1086.49	0	0.84	29.77	10082	10082	MS2	0/0	0	0	hala.raw
High	A	2	YNQLLR	6040	Unambiguous	Alpha-enolase OS=Homo sapiens OX=9606 GN=ENO1 PE=1 SV=2 - [ENOA_HUMAN]	1	1	P06733		HCD	1	0	1	1	0.009	0.13	198	194	1.11	0	38	5	18600000	2	403.729	806.451	0	-0.66	29.78	10087	10087	MS2	0/0	0	0	hala.raw
High	A	2	SEHPGLSIGDTAK	5995	Unambiguous	High mobility group protein B2 OS=Homo sapiens OX=9606 GN=HMGB2 PE=1 SV=2 - [HMGB2_HUMAN]	1	1	P26583		HCD	1	0	1	1	0	0.00618	153	164	1.57	0	71	60	1950000	2	656.333	1311.66	0	4	29.8	10094	10094	MS2	0/0	0	0	hala.raw
High	A	2	GHAVGDIPGVR	6466	Unambiguous	40S ribosomal protein S23 OS=Homo sapiens OX=9606 GN=RPS23 PE=1 SV=3 - [RS23_HUMAN]	1	1	P62266		HCD	1	0	1	1	0.001	0.0218	163	149	1.92	0	31	9	15800000	2	539.295	1077.58	0	2.69	29.8	10096	10096	MS2	0/0	0	0	hala.raw
High	A	2	LcDSYEIRPGK	6468	Unambiguous	Heterogeneous nuclear ribonucleoprotein R OS=Homo sapiens OX=9606 GN=HNRNPR PE=1 SV=1 - [HNRPR_HUMAN]	1	1	O43390	C2(Carbamidomethyl)	HCD	1	0	1	1	0	0.000539	155	156	1.51	0	52	25	7190000	3	446.556	1337.65	0	0.98	29.8	10097	10097	MS2	0/0	0	0	hala.raw
High	A	2	FIMESGAK	6470	Unambiguous	40S ribosomal protein S3 OS=Homo sapiens OX=9606 GN=RPS3 PE=1 SV=2 - [RS3_HUMAN]	1	1	P23396		HCD	1	0	1	1	0	0.00558	124	123	1.56	0	68	22	3180000	2	441.722	882.436	0	-3.4	29.8	10098	10098	MS2	0/0	0	0	hala.raw
High	A	2	GSSEQAESDNMDVPPEDDSK	5856	Unambiguous	Interleukin enhancer-binding factor 3 OS=Homo sapiens OX=9606 GN=ILF3 PE=1 SV=3 - [ILF3_HUMAN]	1	1	Q12906		HCD	1	0	1	1	0.003	0.0441	10	8	0.82	0		60	0	2	1068.93	2136.85	0	1.27	29.81	10102	10102	MS2	0/0	0	0	hala.raw
High	A	2	ETAEAYLGK	6478	Unambiguous	Endoplasmic reticulum chaperone BiP OS=Homo sapiens OX=9606 GN=HSPA5 PE=1 SV=2 - [BIP_HUMAN]	1	1	P11021		HCD	1	0	1	1	0	0.0028	158	167	1.45	0	57	9	8930000	2	491.249	981.491	0	2.45	29.82	10104	10104	MS2	0/0	0	0	hala.raw
High	A	2	TPGPGAQSALR	3894	Unambiguous	40S ribosomal protein S14 OS=Homo sapiens OX=9606 GN=RPS14 PE=1 SV=3 - [RS14_HUMAN]	1	1	P62263		HCD	1	0	1	1	0	0.00419	134	135	1.63	0	78	10	7800000	2	527.786	1054.56	0	0.32	29.83	10108	10108	MS2	0/0	0	0	hala.raw
High	A	2	ATAGDTHLGGEDFDNR	6484	Unambiguous	Heat shock 70 kDa protein 6 OS=Homo sapiens OX=9606 GN=HSPA6 PE=1 SV=2 - [HSP76_HUMAN]|Heat shock 70 kDa protein 1-like OS=Homo sapiens OX=9606 GN=HSPA1L PE=1 SV=2 - [HS71L_HUMAN]|Heat shock 70 kDa protein 1A OS=Homo sapiens OX=9606 GN=HSPA1A PE=1 SV=1 - [HS71A_HUMAN]	4	1	P0DMV8		HCD	1	0	1	1	0.001	0.0202	51	41	1.25	0	51	17	6770000	3	559.247	1675.73	0	-2.33	29.83	10109	10109	MS2	0/0	0	0	hala.raw
High	A	2	LMSNLDSNR	5071	Unambiguous	Protein S100-A4 OS=Homo sapiens OX=9606 GN=S100A4 PE=1 SV=1 - [S10A4_HUMAN]	1	1	P26447		HCD	1	0	1	1	0	0.000877	161	165	1.73	0	20	7	27400000	2	525.255	1049.5	0	-1.54	29.84	10111	10111	MS2	0/0	0	0	hala.raw
High	A	2	GVEEEEEDGEMRE	4730	Unambiguous	Small nuclear ribonucleoprotein F OS=Homo sapiens OX=9606 GN=SNRPF PE=1 SV=1 - [RUXF_HUMAN]	1	1	P62306		HCD	1	0	1	1	0.003	0.0456	6	5	1.44	1	28	60	2440000	2	769.301	1537.6	0	-0.46	29.84	10112	10112	MS2	0/0	0	0	hala.raw
High	A	2	VTLTSEEEAR	4815	Unambiguous	L-lactate dehydrogenase A chain OS=Homo sapiens OX=9606 GN=LDHA PE=1 SV=2 - [LDHA_HUMAN]	1	1	P00338		HCD	1	0	1	1	0	3.48e-05	232	218	1.94	0	31	6	24200000	2	567.786	1134.56	0	0.11	29.85	10115	10115	MS2	0/0	0	0	hala.raw
High	A	2	LPPNTNDEVDEDPTGNK	6496	Unambiguous	Splicing factor 3B subunit 3 OS=Homo sapiens OX=9606 GN=SF3B3 PE=1 SV=4 - [SF3B3_HUMAN]	1	1	Q15393		HCD	1	0	1	1	0.004	0.0525	82	79	0.95	0	0	60	704000	2	927.921	1854.83	0	-0.34	29.85	10117	10117	MS2	0/0	0	0	hala.raw
High	A	2	MDSTANEVEAVK	6072	Unambiguous	Protein disulfide-isomerase OS=Homo sapiens OX=9606 GN=P4HB PE=1 SV=3 - [PDIA1_HUMAN]	1	1	P07237		HCD	1	0	1	1	0	0.000448	111	116	1.6	0	55	60	4290000	2	647.304	1293.6	0	0.65	29.85	10118	10118	MS2	0/0	0	0	hala.raw
High	A	2	SGQGAFGNMcR	6104	Unambiguous	60S ribosomal protein L4 OS=Homo sapiens OX=9606 GN=RPL4 PE=1 SV=5 - [RL4_HUMAN]	1	1	P36578	C10(Carbamidomethyl)	HCD	1	0	1	1	0	0.00489	35	31	1.78	0	75	60	5080000	2	592.751	1184.49	0	1.11	29.86	10120	10120	MS2	0/0	0	0	hala.raw
High	A	2	IFAPNHVVAK	6374	Unambiguous	60S ribosomal protein L18a OS=Homo sapiens OX=9606 GN=RPL18A PE=1 SV=2 - [RL18A_HUMAN]	1	1	Q02543		HCD	1	0	1	1	0.005	0.071	103	86	1	0	29	12	21200000	2	548.32	1095.63	0	0.7	29.86	10121	10121	MS2	0/0	0	0	hala.raw
High	A	2	QADVNLVNAK	6505	Unambiguous	D-3-phosphoglycerate dehydrogenase OS=Homo sapiens OX=9606 GN=PHGDH PE=1 SV=4 - [SERA_HUMAN]	1	1	O43175		HCD	1	0	1	1	0.001	0.0194	186	185	2.33	0	56	30	6710000	2	536.294	1071.58	0	2.09	29.86	10122	10122	MS2	0/0	0	0	hala.raw
High	A	2	YLSEVASGDNK	4380	Unambiguous	14-3-3 protein beta/alpha OS=Homo sapiens OX=9606 GN=YWHAB PE=1 SV=3 - [1433B_HUMAN]	1	1	P31946		HCD	1	0	1	1	0	0.00959	120	124	1.75	0	49	60	5900000	2	591.782	1182.56	0	-6.18	29.87	10123	10123	MS2	0/0	0	0	hala.raw
High	A	2	VIGSGcNLDSAR	5297	Unambiguous	L-lactate dehydrogenase B chain OS=Homo sapiens OX=9606 GN=LDHB PE=1 SV=2 - [LDHB_HUMAN]|L-lactate dehydrogenase A chain OS=Homo sapiens OX=9606 GN=LDHA PE=1 SV=2 - [LDHA_HUMAN]	4	2	P07195;P00338	C6(Carbamidomethyl)	HCD	1	0	1	1	0	1.1e-06	140	111	2.31	0	5	8	44800000	2	624.803	1248.6	0	-1.69	29.87	10127	10127	MS2	0/0	0	0	hala.raw
High	A	2	DINAYNcEEPTEK	6519	Unambiguous	Peroxiredoxin-6 OS=Homo sapiens OX=9606 GN=PRDX6 PE=1 SV=3 - [PRDX6_HUMAN]	1	1	P30041	C7(Carbamidomethyl)	HCD	1	0	1	1	0	0.000159	20	28	2.24	0	27	47	14900000	2	791.835	1582.66	0	-3.5	29.88	10130	10130	MS2	0/0	0	0	hala.raw
High	A	2	EFHLNESGDPSSK	5816	Unambiguous	Protein SET OS=Homo sapiens OX=9606 GN=SET PE=1 SV=3 - [SET_HUMAN]	2	1	Q01105		HCD	1	0	1	1	0	0.000558	85	81	2.29	0	40	60	6940000	2	723.828	1446.65	0	-0.11	29.88	10131	10131	MS2	0/0	0	0	hala.raw
High	A	2	EVSTYIK	150	Unambiguous	Elongation factor 1-alpha 1 OS=Homo sapiens OX=9606 GN=EEF1A1 PE=1 SV=1 - [EF1A1_HUMAN]	2	1	P68104		HCD	1	0	1	1	0.008	0.124	125	142	1.47	0	17	19	11900000	2	420.229	839.452	0	0.78	29.89	10133	10133	MS2	0/0	0	0	hala.raw
High	A	2	NFSDNQLQEGK	5512	Unambiguous	Transgelin-2 OS=Homo sapiens OX=9606 GN=TAGLN2 PE=1 SV=3 - [TAGL2_HUMAN]	1	1	P37802		HCD	1	0	1	1	0	0.007	95	97	1.57	0	35	60	4890000	2	640.299	1279.59	0	-0.01	29.89	10135	10135	MS2	0/0	0	0	hala.raw
Middle	A	2	MVVDQGDPR	5731	Unambiguous	Serine/threonine-protein kinase PAK 6 OS=Homo sapiens OX=9606 GN=PAK6 PE=1 SV=1 - [PAK6_HUMAN]	1	1	Q9NQU5		HCD	1	0	1	1	0.043	0.431	72	75	0.87	0	17	3	48900000	2	508.744	1016.48	0	-2.52	29.9	10137	10137	MS2	0/0	0	0	hala.raw
High	A	2	VEILANDQGNR	5811	Unambiguous	Heat shock cognate 71 kDa protein OS=Homo sapiens OX=9606 GN=HSPA8 PE=1 SV=1 - [HSP7C_HUMAN]|Endoplasmic reticulum chaperone BiP OS=Homo sapiens OX=9606 GN=HSPA5 PE=1 SV=2 - [BIP_HUMAN]|Heat shock 70 kDa protein 1-like OS=Homo sapiens OX=9606 GN=HSPA1L PE=1 SV=2 - [HS71L_HUMAN]|Heat shock 70 kDa protein 1A OS=Homo sapiens OX=9606 GN=HSPA1A PE=1 SV=1 - [HS71A_HUMAN]|Heat shock 70 kDa protein 6 OS=…	7	3	P11142;P11021;P0DMV8		HCD	1	0	1	1	0	2.54e-06	163	179	2.77	0	34	16	20300000	2	614.818	1228.63	0	0.3	29.9	10138	10138	MS2	0/0	0	0	hala.raw
High	A	2	VEIIANDQGNR	5811	Unambiguous	Heat shock cognate 71 kDa protein OS=Homo sapiens OX=9606 GN=HSPA8 PE=1 SV=1 - [HSP7C_HUMAN]|Endoplasmic reticulum chaperone BiP OS=Homo sapiens OX=9606 GN=HSPA5 PE=1 SV=2 - [BIP_HUMAN]|Heat shock 70 kDa protein 1-like OS=Homo sapiens OX=9606 GN=HSPA1L PE=1 SV=2 - [HS71L_HUMAN]|Heat shock 70 kDa protein 1A OS=Homo sapiens OX=9606 GN=HSPA1A PE=1 SV=1 - [HS71A_HUMAN]|Heat shock 70 kDa protein 6 OS=…	7	3	P11142;P11021;P0DMV8		HCD	1	0	1	2	0	2.54e-06	163	179	2.77	0	34	16	20300000	2	614.818	1228.63	0	0.3	29.9	10138	10138	MS2	0/0	0	0	hala.raw
High	A	2	FEPYANPTK	6536	Unambiguous	Heterogeneous nuclear ribonucleoprotein M OS=Homo sapiens OX=9606 GN=HNRNPM PE=1 SV=3 - [HNRPM_HUMAN]	1	1	P52272		HCD	1	0	1	1	0	0.00428	140	160	1.34	0	61	8	13100000	2	533.763	1066.52	0	-1.13	29.9	10140	10140	MS2	0/0	0	0	hala.raw
High	A	2	LELQGPR	6540	Unambiguous	Nucleolin OS=Homo sapiens OX=9606 GN=NCL PE=1 SV=3 - [NUCL_HUMAN]	1	1	P19338		HCD	1	0	1	1	0.001	0.018	84	89	1.42	0	46	17	6730000	2	406.736	812.464	0	1.49	29.9	10142	10142	MS2	0/0	0	0	hala.raw
High	A	2	DGQVINETSQHHDDLE	6133	Unambiguous	Vimentin OS=Homo sapiens OX=9606 GN=VIM PE=1 SV=4 - [VIME_HUMAN]	1	1	P08670		HCD	1	0	1	1	0.003	0.0471	72	51	1.56	0	36	60	3550000	2	918.901	1836.8	0	-2.36	29.9	10143	10143	MS2	0/0	0	0	hala.raw
High	A	2	EIAQDFK	4854	Unambiguous	Histone H3.1 OS=Homo sapiens OX=9606 GN=HIST1H3A PE=1 SV=2 - [H31_HUMAN]	4	1	P68431		HCD	1	0	1	1	0.007	0.0946	134	162	1.21	0	6	5	39000000	2	425.719	850.431	0	0.69	29.91	10146	10146	MS2	0/0	0	0	hala.raw
High	A	2	EVATNSELVQSGK	4862	Unambiguous	Keratin, type I cytoskeletal 17 OS=Homo sapiens OX=9606 GN=KRT17 PE=1 SV=2 - [K1C17_HUMAN]	2	1	Q04695		HCD	1	0	1	1	0	4.22e-06	218	208	2.84	0	7	40	18500000	2	681.349	1361.69	0	0.69	29.91	10147	10147	MS2	0/0	0	0	hala.raw
High	A	2	LAPEYEAAATR	6550	Unambiguous	Protein disulfide-isomerase A3 OS=Homo sapiens OX=9606 GN=PDIA3 PE=1 SV=4 - [PDIA3_HUMAN]	1	1	P30101		HCD	1	0	1	1	0	0.000386	244	211	1.84	0	23	26	8240000	2	596.304	1191.6	0	0.95	29.91	10148	10148	MS2	0/0	0	0	hala.raw
High	A	2	VMEHFIK	6552	Unambiguous	Endoplasmic reticulum chaperone BiP OS=Homo sapiens OX=9606 GN=HSPA5 PE=1 SV=2 - [BIP_HUMAN]	1	1	P11021		HCD	1	0	1	1	0.003	0.0401	263	254	1	0	46	10	12300000	2	452.242	903.476	0	0.3	29.92	10149	10149	MS2	0/0	0	0	hala.raw
High	A	2	FcLDNGAK	6163	Unambiguous	Phosphoglycerate kinase 1 OS=Homo sapiens OX=9606 GN=PGK1 PE=1 SV=3 - [PGK1_HUMAN]	1	1	P00558	C2(Carbamidomethyl)	HCD	1	0	1	1	0.004	0.0529	102	94	1.39	0	44	10	8800000	2	462.716	924.426	0	1.25	29.92	10152	10152	MS2	0/0	0	0	hala.raw
High	A	2	INISEGNcPER	5425	Unambiguous	Poly(rC)-binding protein 1 OS=Homo sapiens OX=9606 GN=PCBP1 PE=1 SV=2 - [PCBP1_HUMAN]|Poly(rC)-binding protein 2 OS=Homo sapiens OX=9606 GN=PCBP2 PE=1 SV=1 - [PCBP2_HUMAN]	3	2	Q15365;Q15366	C8(Carbamidomethyl)	HCD	1	0	1	1	0	0.00013	96	88	2.53	0	25	60	6730000	2	644.801	1288.59	0	-0.81	29.93	10153	10153	MS2	0/0	0	0	hala.raw
High	A	2	ATAGDTHLGGEDFDNR	6484	Unambiguous	Heat shock 70 kDa protein 6 OS=Homo sapiens OX=9606 GN=HSPA6 PE=1 SV=2 - [HSP76_HUMAN]|Heat shock 70 kDa protein 1-like OS=Homo sapiens OX=9606 GN=HSPA1L PE=1 SV=2 - [HS71L_HUMAN]|Heat shock 70 kDa protein 1A OS=Homo sapiens OX=9606 GN=HSPA1A PE=1 SV=1 - [HS71A_HUMAN]	4	1	P0DMV8		HCD	1	0	1	1	0	1.22e-07	62	49	3.25	0	0	45	17200000	2	838.369	1675.73	0	-0.14	29.93	10155	10155	MS2	0/0	0	0	hala.raw
Middle	A	2	LPEGDLGK	4514	Unambiguous	Eukaryotic translation initiation factor 5A-1 OS=Homo sapiens OX=9606 GN=EIF5A PE=1 SV=2 - [IF5A1_HUMAN]	2	1	P63241		HCD	1	0	1	1	0.011	0.158	83	89	1.45	0	66	60	3870000	2	414.727	828.447	0	1.26	29.93	10156	10156	MS2	0/0	0	0	hala.raw
High	A	2	HEQNIDcGGGYVK	3439	Unambiguous	Calreticulin OS=Homo sapiens OX=9606 GN=CALR PE=1 SV=1 - [CALR_HUMAN]	1	1	P27797	C7(Carbamidomethyl)	HCD	1	0	1	1	0	5e-06	59	63	2.59	0	31	60	3620000	2	738.831	1476.65	0	0.05	29.94	10157	10157	MS2	0/0	0	0	hala.raw
High	A	2	EGNPEEDLTADK	6567	Unambiguous	Macrophage-capping protein OS=Homo sapiens OX=9606 GN=CAPG PE=1 SV=2 - [CAPG_HUMAN]	1	1	P40121		HCD	1	0	1	1	0	0.000539	45	43	2.01	0	53	60	3660000	2	659.293	1317.58	0	-1.99	29.94	10158	10158	MS2	0/0	0	0	hala.raw
High	A	2	ELNITAAK	6571	Unambiguous	40S ribosomal protein S7 OS=Homo sapiens OX=9606 GN=RPS7 PE=1 SV=1 - [RS7_HUMAN]	1	1	P62081		HCD	1	0	1	1	0.002	0.0257	234	212	1.81	0	54	8	10100000	2	430.248	859.489	0	1.26	29.94	10160	10160	MS2	0/0	0	0	hala.raw
High	A	2	HTGPNSPDTANDGFVR	5021	Unambiguous	Heterogeneous nuclear ribonucleoprotein H2 OS=Homo sapiens OX=9606 GN=HNRNPH2 PE=1 SV=1 - [HNRH2_HUMAN]|Heterogeneous nuclear ribonucleoprotein H OS=Homo sapiens OX=9606 GN=HNRNPH1 PE=1 SV=4 - [HNRH1_HUMAN]	2	2	P55795;P31943		HCD	1	0	1	1	0	1.38e-05	106	106	1.98	0	43	60	3230000	2	842.888	1684.77	0	0.39	29.94	10161	10161	MS2	0/0	0	0	hala.raw
High	A	2	GVDLQENNPASR	5580	Unambiguous	Ras-related protein Rab-5C OS=Homo sapiens OX=9606 GN=RAB5C PE=1 SV=2 - [RAB5C_HUMAN]	1	1	P51148		HCD	1	0	1	1	0.006	0.0837	133	146	1.29	0	41	60	1920000	2	650.321	1299.63	0	4.13	29.95	10163	10163	MS2	0/0	0	0	hala.raw
High	A	2	QEYDESGPSIVHR	5898	Unambiguous	Actin, cytoplasmic 1 OS=Homo sapiens OX=9606 GN=ACTB PE=1 SV=1 - [ACTB_HUMAN]	7	1	P60709		HCD	1	0	1	1	0	5.41e-05	90	103	2.41	0	6	5	44000000	3	506.24	1516.7	0	1.12	29.96	10166	10166	MS2	0/0	0	0	hala.raw
High	A	2	FETEQALR	6582	Unambiguous	Keratin, type I cytoskeletal 17 OS=Homo sapiens OX=9606 GN=KRT17 PE=1 SV=2 - [K1C17_HUMAN]|Keratin, type I cytoskeletal 19 OS=Homo sapiens OX=9606 GN=KRT19 PE=1 SV=4 - [K1C19_HUMAN]	2	2	Q04695;P08727		HCD	1	0	1	1	0	0.00298	229	211	1.68	0	39	11	8880000	2	497.255	993.503	0	3.03	29.96	10167	10167	MS2	0/0	0	0	hala.raw
High	A	2	FESPEVAER	6595	Unambiguous	Heterogeneous nuclear ribonucleoprotein M OS=Homo sapiens OX=9606 GN=HNRNPM PE=1 SV=3 - [HNRPM_HUMAN]	1	1	P52272		HCD	1	0	1	1	0	0.00268	122	130	1.68	0	58	14	9350000	2	532.257	1063.51	0	1.63	29.97	10174	10174	MS2	0/0	0	0	hala.raw
High	A	2	NNASTDYDLSDK	5349	Unambiguous	60S ribosomal protein L3 OS=Homo sapiens OX=9606 GN=RPL3 PE=1 SV=2 - [RL3_HUMAN]	1	1	P39023		HCD	1	0	1	1	0	0.000208	27	25	1.79	0	57	60	2910000	2	671.79	1342.57	0	-1.76	29.97	10175	10175	MS2	0/0	0	0	hala.raw
High	A	2	YDDMAAcMK	2751	Unambiguous	14-3-3 protein zeta/delta OS=Homo sapiens OX=9606 GN=YWHAZ PE=1 SV=1 - [1433Z_HUMAN]	1	1	P63104	C7(Carbamidomethyl)	HCD	1	0	1	1	0	0.000239	3	2	1.81	0	37	9	16300000	2	552.712	1104.42	0	0.57	29.98	10177	10177	MS2	0/0	0	0	hala.raw
High	A	2	ISSSSFSR	3579	Unambiguous	Keratin, type II cytoskeletal 8 OS=Homo sapiens OX=9606 GN=KRT8 PE=1 SV=7 - [K2C8_HUMAN]	1	1	P05787		HCD	1	0	1	1	0	0.00114	106	117	1.67	0	76	16	3070000	2	435.719	870.432	0	0.03	29.98	10179	10179	MS2	0/0	0	0	hala.raw
High	A	2	AGFAGDDAPR	3795	Unambiguous	Actin, alpha cardiac muscle 1 OS=Homo sapiens OX=9606 GN=ACTC1 PE=1 SV=1 - [ACTC_HUMAN]|Actin, cytoplasmic 1 OS=Homo sapiens OX=9606 GN=ACTB PE=1 SV=1 - [ACTB_HUMAN]	10	2	P68032;P60709		HCD	1	0	1	1	0	0.000718	84	91	1.51	0	31	3	45300000	2	488.728	976.45	0	1.25	29.99	10181	10181	MS2	0/0	0	0	hala.raw
High	A	2	IQFKPDDGTTPER	6609	Unambiguous	Far upstream element-binding protein 1 OS=Homo sapiens OX=9606 GN=FUBP1 PE=1 SV=3 - [FUBP1_HUMAN]	1	1	Q96AE4		HCD	1	0	1	1	0	0.000898	177	196	2	0	12	60	3410000	2	752.375	1503.74	0	-1.09	29.99	10183	10183	MS2	0/0	0	0	hala.raw
High	A	2	QPGNETADTVLK	6615	Unambiguous	Prefoldin subunit 3 OS=Homo sapiens OX=9606 GN=VBP1 PE=1 SV=3 - [PFD3_HUMAN]	1	1	P61758		HCD	1	0	1	1	0	0.00433	169	163	2.05	0	66	60	4420000	2	636.826	1272.64	0	1.27	30	10186	10186	MS2	0/0	0	0	hala.raw
Middle	A	2	KQSPHENSSLIR	6619	Unambiguous	Coiled-coil domain-containing protein 168 OS=Homo sapiens OX=9606 GN=CCDC168 PE=2 SV=2 - [CC168_HUMAN]	1	1	Q8NDH2		HCD	1	0	1	1	0.011	0.157	178	158	2.17	1	74	29	2190000	3	465.916	1395.73	0	-0.13	30	10188	10188	MS2	0/0	0	0	hala.raw
Middle	A	2	IIAPPER	4510	Unambiguous	Actin, alpha cardiac muscle 1 OS=Homo sapiens OX=9606 GN=ACTC1 PE=1 SV=1 - [ACTC_HUMAN]|Beta-actin-like protein 2 OS=Homo sapiens OX=9606 GN=ACTBL2 PE=1 SV=2 - [ACTBL_HUMAN]|Actin, cytoplasmic 1 OS=Homo sapiens OX=9606 GN=ACTB PE=1 SV=1 - [ACTB_HUMAN]	7	3	P68032;Q562R1;P60709		HCD	1	0	1	1	0.011	0.155	61	60	1.62	0	16	6	27800000	2	398.24	795.473	0	0.2	30.01	10194	10194	MS2	0/0	0	0	hala.raw
High	A	2	AQAAAPASVPAQAPK	4933	Unambiguous	60S ribosomal protein L29 OS=Homo sapiens OX=9606 GN=RPL29 PE=1 SV=2 - [RL29_HUMAN]	1	1	P47914		HCD	1	0	1	1	0	7.95e-06	205	236	2.64	0		49	0	2	689.379	1377.75	0	1.77	30.02	10196	10196	MS2	0/0	0	0	hala.raw
High	A	2	FETLQAQAGK	6102	Unambiguous	Keratin, type II cytoskeletal 7 OS=Homo sapiens OX=9606 GN=KRT7 PE=1 SV=5 - [K2C7_HUMAN]	1	1	P08729		HCD	1	0	1	1	0	0.000565	235	224	1.77	0	48	24	9250000	2	546.788	1092.57	0	0.85	30.02	10197	10197	MS2	0/0	0	0	hala.raw
High	A	2	IQFKPDDGTTPER	6609	Unambiguous	Far upstream element-binding protein 1 OS=Homo sapiens OX=9606 GN=FUBP1 PE=1 SV=3 - [FUBP1_HUMAN]	1	1	Q96AE4		HCD	1	0	1	1	0	0.00104	183	196	1.5	0	48	10	6300000	3	501.92	1503.75	0	1.26	30.02	10198	10198	MS2	0/0	0	0	hala.raw
High	A	2	AAEAAAAPAESAAPAAGEEPSKEEGEPK	5053	Unambiguous	Brain acid soluble protein 1 OS=Homo sapiens OX=9606 GN=BASP1 PE=1 SV=2 - [BASP1_HUMAN]	1	1	P80723		HCD	1	0	1	1	0.007	0.0978	123	104	1.63	1	7	60	1980000	3	879.414	2636.23	0	-2.22	30.02	10200	10200	MS2	0/0	0	0	hala.raw
High	A	2	LYGSAGPPPTGEEDTAEK	6644	Unambiguous	Endoplasmic reticulum chaperone BiP OS=Homo sapiens OX=9606 GN=HSPA5 PE=1 SV=2 - [BIP_HUMAN]	1	1	P11021		HCD	1	0	1	1	0	7.79e-05	111	113	1.86	0	58	60	2050000	2	909.924	1818.84	0	0.26	30.03	10202	10202	MS2	0/0	0	0	hala.raw
High	A	2	VDNDENEHQLSLR	5397	Unambiguous	Nucleophosmin OS=Homo sapiens OX=9606 GN=NPM1 PE=1 SV=2 - [NPM_HUMAN]	1	1	P06748		HCD	1	0	1	1	0	3.24e-07	145	113	3.26	0	22	53	11200000	2	784.87	1568.73	0	1.42	30.03	10204	10204	MS2	0/0	0	0	hala.raw
High	A	2	GNLGAGNGNLQGPR	5017	Unambiguous	Matrin-3 OS=Homo sapiens OX=9606 GN=MATR3 PE=1 SV=2 - [MATR3_HUMAN]	1	1	P43243		HCD	1	0	1	1	0.005	0.0788	164	160	1.47	0	28	60	5000000	2	662.836	1324.66	0	-5.28	30.04	10209	10209	MS2	0/0	0	0	hala.raw
High	A	2	VVAVDcGIK	6662	Unambiguous	Carbamoyl-phosphate synthase [ammonia], mitochondrial OS=Homo sapiens OX=9606 GN=CPS1 PE=1 SV=2 - [CPSM_HUMAN]	1	1	P31327	C6(Carbamidomethyl)	HCD	1	0	1	1	0	0.00313	271	270	1.37	0	33	6	19100000	2	480.763	960.518	0	-0.04	30.05	10213	10213	MS2	0/0	0	0	hala.raw
High	A	2	STAGDTHLGGEDFDNR	6272	Unambiguous	Heat shock cognate 71 kDa protein OS=Homo sapiens OX=9606 GN=HSPA8 PE=1 SV=1 - [HSP7C_HUMAN]	2	1	P11142		HCD	1	0	1	1	0	3.79e-07	38	34	2.94	0	11	60	10100000	2	846.367	1691.73	0	0.56	30.06	10214	10214	MS2	0/0	0	0	hala.raw
High	A	2	LQDAEIAR	4069	Unambiguous	Protein S100-A6 OS=Homo sapiens OX=9606 GN=S100A6 PE=1 SV=1 - [S10A6_HUMAN]	1	1	P06703		HCD	1	0	1	1	0	0.00582	140	151	1.38	0	44	13	6400000	2	458.249	915.49	0	0.55	30.06	10215	10215	MS2	0/0	0	0	hala.raw
High	A	2	TNEAQAIETAR	6668	Unambiguous	Ubiquitin-conjugating enzyme E2 N OS=Homo sapiens OX=9606 GN=UBE2N PE=1 SV=1 - [UBE2N_HUMAN]	2	1	P61088		HCD	1	0	1	1	0	0.00296	215	210	2.25	0	56	28	2990000	2	602.307	1203.61	0.01	9.15	30.06	10216	10216	MS2	0/0	0	0	hala.raw
High	A	2	FGQGGAGPVGGQGPR	5121	Unambiguous	Splicing factor, proline- and glutamine-rich OS=Homo sapiens OX=9606 GN=SFPQ PE=1 SV=2 - [SFPQ_HUMAN]	1	1	P23246		HCD	1	0	1	1	0	8.56e-05	178	181	2.19	0	58	60	3680000	2	671.339	1341.67	0	3.66	30.07	10222	10222	MS2	0/0	0	0	hala.raw
Middle	A	2	KGEFETGFEK	6681	Rejected	Eukaryotic peptide chain release factor GTP-binding subunit ERF3A OS=Homo sapiens OX=9606 GN=GSPT1 PE=1 SV=1 - [ERF3A_HUMAN]	2	1	P15170		HCD	0.0116	0	1	1	0.045	0.441	125	118	1.72	1	59	60	3340000	2	586.287	1171.57	0	3.23	30.07	10223	10223	MS2	0/0	0	0	hala.raw
Middle	A	2	HQGVMVGMGQK	4226	Selected	Actin, alpha cardiac muscle 1 OS=Homo sapiens OX=9606 GN=ACTC1 PE=1 SV=1 - [ACTC_HUMAN]|Beta-actin-like protein 2 OS=Homo sapiens OX=9606 GN=ACTBL2 PE=1 SV=2 - [ACTBL_HUMAN]|Actin, cytoplasmic 1 OS=Homo sapiens OX=9606 GN=ACTB PE=1 SV=1 - [ACTB_HUMAN]	7	3	P68032;Q562R1;P60709		HCD		0.0116	2	2	0.019	0.237	125	118	1.7	0	59	60	3340000	2	586.287	1171.57	0	-3.68	30.07	10223	10223	MS2	0/0	0	0	hala.raw
High	A	2	VDNDENEHQLSLR	5397	Unambiguous	Nucleophosmin OS=Homo sapiens OX=9606 GN=NPM1 PE=1 SV=2 - [NPM_HUMAN]	1	1	P06748		HCD	1	0	1	1	0	0.000522	147	117	1.82	0	42	10	23900000	3	523.582	1568.73	0	0.63	30.08	10225	10225	MS2	0/0	0	0	hala.raw
Middle	A	2	DIQLAR	5429	Selected	Histone H3.1 OS=Homo sapiens OX=9606 GN=HIST1H3A PE=1 SV=2 - [H31_HUMAN]	5	1	P68431		HCD	0.0153	0	1	1	0.035	0.371	209	205	1.96	0	10	18	10900000	2	358.209	715.41	0	0.12	30.08	10226	10226	MS2	0/0	0	0	hala.raw
Middle	A	2	DIGAIAR	5430	Rejected	Dihydropyrimidinase-related protein 5 OS=Homo sapiens OX=9606 GN=DPYSL5 PE=1 SV=1 - [DPYL5_HUMAN]	1	1	Q9BPU6		HCD		0.0153	2	2	0.034	0.368	209	205	1.93	0	10	18	10900000	2	358.209	715.41	0	0.11	30.08	10226	10226	MS2	0/0	0	0	hala.raw
High	A	2	YDDMAAcMK	2751	Unambiguous	14-3-3 protein zeta/delta OS=Homo sapiens OX=9606 GN=YWHAZ PE=1 SV=1 - [1433Z_HUMAN]	1	1	P63104	C7(Carbamidomethyl)	HCD	1	0	1	1	0	0.000934	3	2	2.43	0	37	13	33800000	2	552.712	1104.42	0	0.68	30.09	10228	10228	MS2	0/0	0	0	hala.raw
High	A	2	SPPPGMGLNQNR	5794	Unambiguous	Splicing factor, proline- and glutamine-rich OS=Homo sapiens OX=9606 GN=SFPQ PE=1 SV=2 - [SFPQ_HUMAN]	1	1	P23246		HCD	1	0	1	1	0.001	0.0165	162	163	1.37	0	48	60	3220000	2	634.315	1267.62	0	1.84	30.09	10229	10229	MS2	0/0	0	0	hala.raw
High	A	2	QTATQLLK	6692	Unambiguous	60S ribosomal protein L7a OS=Homo sapiens OX=9606 GN=RPL7A PE=1 SV=2 - [RL7A_HUMAN]	1	1	P62424		HCD	1	0	1	1	0.005	0.0789	173	179	1.74	0	61	4	18000000	2	451.769	902.531	0	0.44	30.09	10231	10231	MS2	0/0	0	0	hala.raw
High	A	2	ISSDLDGHPVPK	5217	Unambiguous	Transketolase OS=Homo sapiens OX=9606 GN=TKT PE=1 SV=3 - [TKT_HUMAN]	1	1	P29401		HCD	1	0	1	1	0	0.00196	234	205	2.05	0	44	60	3670000	2	632.833	1264.66	0	4.05	30.09	10232	10232	MS2	0/0	0	0	hala.raw
High	A	2	EDMAALEK	5401	Unambiguous	Tubulin alpha-1A chain OS=Homo sapiens OX=9606 GN=TUBA1A PE=1 SV=1 - [TBA1A_HUMAN]|Tubulin alpha-1B chain OS=Homo sapiens OX=9606 GN=TUBA1B PE=1 SV=1 - [TBA1B_HUMAN]|Tubulin alpha-1C chain OS=Homo sapiens OX=9606 GN=TUBA1C PE=1 SV=1 - [TBA1C_HUMAN]|Tubulin alpha-4A chain OS=Homo sapiens OX=9606 GN=TUBA4A PE=1 SV=1 - [TBA4A_HUMAN]	4	2	Q9BQE3;P68366		HCD	1	0	1	1	0.009	0.129	89	92	1.19	0	35	8	12200000	2	453.716	906.424	0	0.72	30.09	10233	10233	MS2	0/0	0	0	hala.raw
High	A	2	AAEAAAAPAESAAPAAGEEPSK	5029	Unambiguous	Brain acid soluble protein 1 OS=Homo sapiens OX=9606 GN=BASP1 PE=1 SV=2 - [BASP1_HUMAN]	1	1	P80723		HCD	1	0	1	1	0	6.66e-05	140	142	2.25	0	48	60	2170000	2	983.973	1966.94	0	1.42	30.1	10237	10237	MS2	0/0	0	0	hala.raw
High	A	2	YRPGTVALR	4616	Unambiguous	Histone H3.1 OS=Homo sapiens OX=9606 GN=HIST1H3A PE=1 SV=2 - [H31_HUMAN]	5	1	P68431		HCD	1	0	1	1	0	0.00806	150	159	1.79	0	16	2	85900000	2	516.801	1032.6	0	0.56	30.12	10243	10243	MS2	0/0	0	0	hala.raw
High	A	2	APEQEQAAPGPAAGGEAPK	3410	Unambiguous	Brain acid soluble protein 1 OS=Homo sapiens OX=9606 GN=BASP1 PE=1 SV=2 - [BASP1_HUMAN]	1	1	P80723		HCD	1	0	1	1	0	0.000109	188	162	2.65	0	19	60	3610000	2	888.431	1775.85	0	-1.16	30.12	10246	10246	MS2	0/0	0	0	hala.raw
Middle	A	2	VcNVAPIAGETK	6721	Unambiguous	Nucleolar GTP-binding protein 2 OS=Homo sapiens OX=9606 GN=GNL2 PE=1 SV=1 - [NOG2_HUMAN]	1	1	Q13823	C2(Carbamidomethyl)	HCD	1	0	1	1	0.023	0.265	226	206	1.18	0	45	55	11200000	2	629.831	1258.65	0	6.19	30.13	10248	10248	MS2	0/0	0	0	hala.raw
High	A	2	IGAEVYHNLK	6384	Unambiguous	Alpha-enolase OS=Homo sapiens OX=9606 GN=ENO1 PE=1 SV=2 - [ENOA_HUMAN]	1	1	P06733		HCD	1	0	1	1	0	0.000264	236	240	1.99	0	14	7	29700000	2	572.311	1143.62	0	-0.06	30.14	10252	10252	MS2	0/0	0	0	hala.raw
High	A	2	FNAHGDANTIVcNSK	5190	Unambiguous	Galectin-1 OS=Homo sapiens OX=9606 GN=LGALS1 PE=1 SV=2 - [LEG1_HUMAN]	1	1	P09382	C12(Carbamidomethyl)	HCD	1	0	1	1	0.001	0.0119	107	100	1.46	0	16	60	1680000	2	824.38	1647.75	0	-1.11	30.14	10254	10254	MS2	0/0	0	0	hala.raw
High	A	2	YELISETGGSHDK	6734	Unambiguous	Interleukin enhancer-binding factor 3 OS=Homo sapiens OX=9606 GN=ILF3 PE=1 SV=3 - [ILF3_HUMAN]	2	1	Q12906		HCD	1	0	1	1	0	3.21e-05	122	110	2.42	0	40	60	4260000	2	718.337	1435.67	0	-1.9	30.14	10255	10255	MS2	0/0	0	0	hala.raw
High	A	2	SAITPGGLR	6740	Unambiguous	Serine hydroxymethyltransferase, mitochondrial OS=Homo sapiens OX=9606 GN=SHMT2 PE=1 SV=3 - [GLYM_HUMAN]	1	1	P34897		HCD	1	0	1	1	0.007	0.102	133	147	1.27	0	59	10	7540000	2	436.253	871.5	0	0.05	30.14	10258	10258	MS2	0/0	0	0	hala.raw
High	A	2	LNLVQR	6342	Unambiguous	L-lactate dehydrogenase B chain OS=Homo sapiens OX=9606 GN=LDHB PE=1 SV=2 - [LDHB_HUMAN]|L-lactate dehydrogenase A chain OS=Homo sapiens OX=9606 GN=LDHA PE=1 SV=2 - [LDHA_HUMAN]	3	2	P07195;P00338		HCD	1	0	1	1	0.007	0.0921	86	85	1.72	0	35	24	10300000	2	371.732	742.457	0	0.23	30.15	10260	10260	MS2	0/0	0	0	hala.raw
High	A	2	cYScGEFGHIQK	6744	Unambiguous	Cellular nucleic acid-binding protein OS=Homo sapiens OX=9606 GN=CNBP PE=1 SV=1 - [CNBP_HUMAN]	1	1	P62633	C1(Carbamidomethyl); C4(Carbamidomethyl)	HCD	1	0	1	1	0	0.00115	27	27	1.92	0	47	59	8150000	2	743.316	1485.62	0	-0.13	30.15	10261	10261	MS2	0/0	0	0	hala.raw
High	A	2	SHMMDVQGSTQDSAIK	6748	Unambiguous	Protein disulfide-isomerase A4 OS=Homo sapiens OX=9606 GN=PDIA4 PE=1 SV=2 - [PDIA4_HUMAN]	1	1	P13667		HCD	1	0	1	1	0	3.9e-05	83	78	2.19	0	23	60	2210000	2	867.894	1734.78	0	1.75	30.16	10263	10263	MS2	0/0	0	0	hala.raw
High	A	2	AFDQLR	5166	Unambiguous	Transketolase OS=Homo sapiens OX=9606 GN=TKT PE=1 SV=3 - [TKT_HUMAN]	2	1	P29401		HCD	1	0	1	3	0.006	0.0891	179	193	0.82	0	65	60	1050000	2	375.201	749.395	0	0.56	30.16	10264	10264	MS2	0/0	0	0	hala.raw
High	A	2	AFDQIR	5166	Unambiguous	Transketolase OS=Homo sapiens OX=9606 GN=TKT PE=1 SV=3 - [TKT_HUMAN]	2	1	P29401		HCD	1	0	1	4	0.006	0.0891	179	193	0.82	0	65	60	1050000	2	375.201	749.395	0	0.56	30.16	10264	10264	MS2	0/0	0	0	hala.raw
High	A	2	cDEPILSNR	6754	Unambiguous	Phosphatidylethanolamine-binding protein 1 OS=Homo sapiens OX=9606 GN=PEBP1 PE=1 SV=3 - [PEBP1_HUMAN]	1	1	P30086	C1(Carbamidomethyl)	HCD	1	0	1	1	0.003	0.0377	98	111	1.4	0	69	9	6390000	2	552.263	1103.52	0	4.12	30.17	10267	10267	MS2	0/0	0	0	hala.raw
High	A	2	ASLENSLR	6344	Unambiguous	Keratin, type I cytoskeletal 18 OS=Homo sapiens OX=9606 GN=KRT18 PE=1 SV=2 - [K1C18_HUMAN]	1	1	P05783		HCD	1	0	1	1	0	0.0027	242	273	1.52	0	61	14	5710000	2	445.24	889.473	0	-0.76	30.17	10269	10269	MS2	0/0	0	0	hala.raw
High	A	2	KPPLLNNADSVQAK	6762	Unambiguous	Poly [ADP-ribose] polymerase 1 OS=Homo sapiens OX=9606 GN=PARP1 PE=1 SV=4 - [PARP1_HUMAN]	1	1	P09874		HCD	1	0	1	1	0	0.000234	146	139	2.04	0	21	60	2220000	2	747.917	1494.83	0	0.01	30.18	10271	10271	MS2	0/0	0	0	hala.raw
High	A	2	SEMTPEELQK	6764	Unambiguous	Small nuclear ribonucleoprotein Sm D2 OS=Homo sapiens OX=9606 GN=SNRPD2 PE=1 SV=1 - [SMD2_HUMAN]	1	1	P62316		HCD	1	0	1	1	0	0.00289	109	118	1.47	0	51	27	7580000	2	596.283	1191.56	0	2.32	30.18	10273	10273	MS2	0/0	0	0	hala.raw
High	A	2	IVVAMAK	6770	Unambiguous	Enoyl-CoA hydratase, mitochondrial OS=Homo sapiens OX=9606 GN=ECHS1 PE=1 SV=4 - [ECHM_HUMAN]	1	1	P30084		HCD	1	0	1	1	0.004	0.0525	311	294	1.46	0	75	60	1160000	2	366.228	731.448	0	-0.32	30.19	10276	10276	MS2	0/0	0	0	hala.raw
High	A	2	TPAQYDASELK	6372	Unambiguous	Annexin A2 OS=Homo sapiens OX=9606 GN=ANXA2 PE=1 SV=2 - [ANXA2_HUMAN]	2	1	P07355		HCD	1	0	1	1	0	3.43e-06	185	182	2.44	0	16	9	23200000	2	611.802	1222.6	0	0.97	30.2	10280	10280	MS2	0/0	0	0	hala.raw
High	A	2	TNHIYVSSDDIK	6778	Unambiguous	Pre-mRNA-processing-splicing factor 8 OS=Homo sapiens OX=9606 GN=PRPF8 PE=1 SV=2 - [PRP8_HUMAN]	1	1	Q6P2Q9		HCD	1	0	1	1	0	0.00114	216	207	2.3	0	32	60	3010000	2	696.345	1391.68	0	2.05	30.2	10281	10281	MS2	0/0	0	0	hala.raw
High	A	2	ETPAATEAPSSTPK	2813	Unambiguous	Brain acid soluble protein 1 OS=Homo sapiens OX=9606 GN=BASP1 PE=1 SV=2 - [BASP1_HUMAN]	1	1	P80723		HCD	1	0	1	1	0	4.57e-05	152	145	2.42	0	52	60	2100000	2	693.842	1386.68	0	1.46	30.2	10282	10282	MS2	0/0	0	0	hala.raw
High	A	2	STAGDTHLGGEDFDNR	6272	Unambiguous	Heat shock cognate 71 kDa protein OS=Homo sapiens OX=9606 GN=HSPA8 PE=1 SV=1 - [HSP7C_HUMAN]	2	1	P11142		HCD	1	0	1	1	0	0.00393	41	38	2	0	44	60	6390000	3	564.581	1691.73	0	1.09	30.2	10283	10283	MS2	0/0	0	0	hala.raw
High	A	2	SETDTSLIR	6784	Unambiguous	T-complex protein 1 subunit zeta OS=Homo sapiens OX=9606 GN=CCT6A PE=1 SV=3 - [TCPZ_HUMAN]	1	1	P40227		HCD	1	0	1	1	0.002	0.0245	217	214	1.51	0	46	18	6350000	2	511.265	1021.52	0	6.9	30.2	10284	10284	MS2	0/0	0	0	hala.raw
High	A	2	HcNMVLENVK	6786	Unambiguous	Small nuclear ribonucleoprotein Sm D2 OS=Homo sapiens OX=9606 GN=SNRPD2 PE=1 SV=1 - [SMD2_HUMAN]	1	1	P62316	C2(Carbamidomethyl)	HCD	1	0	1	1	0	0.000425	89	92	2.17	0	60	10	11900000	2	622.302	1243.6	0	3.7	30.2	10285	10285	MS2	0/0	0	0	hala.raw
High	A	2	VLNTNIDGR	5962	Unambiguous	40S ribosomal protein S18 OS=Homo sapiens OX=9606 GN=RPS18 PE=1 SV=3 - [RS18_HUMAN]	1	1	P62269		HCD	1	0	1	1	0	0.00133	199	198	1.57	0	36	13	6600000	2	501.272	1001.54	0	-0.38	30.21	10289	10289	MS2	0/0	0	0	hala.raw
High	A	2	EAVAMESYAK	3084	Unambiguous	T-complex protein 1 subunit beta OS=Homo sapiens OX=9606 GN=CCT2 PE=1 SV=4 - [TCPB_HUMAN]	1	1	P78371		HCD	1	0	1	1	0	0.00406	100	99	1.69	0	60	17	6310000	2	549.761	1098.51	0	0.29	30.22	10291	10291	MS2	0/0	0	0	hala.raw
High	A	2	LSVDYGK	5156	Unambiguous	Tubulin alpha-1A chain OS=Homo sapiens OX=9606 GN=TUBA1A PE=1 SV=1 - [TBA1A_HUMAN]|Tubulin alpha-1B chain OS=Homo sapiens OX=9606 GN=TUBA1B PE=1 SV=1 - [TBA1B_HUMAN]|Tubulin alpha-1C chain OS=Homo sapiens OX=9606 GN=TUBA1C PE=1 SV=1 - [TBA1C_HUMAN]|Tubulin alpha-4A chain OS=Homo sapiens OX=9606 GN=TUBA4A PE=1 SV=1 - [TBA4A_HUMAN]	5	2	Q9BQE3;P68366		HCD	1	0	1	1	0.002	0.0261	136	143	1.31	0	36	35	4880000	2	391.209	781.41	0	0.98	30.23	10299	10299	MS2	0/0	0	0	hala.raw
High	A	2	FGSGMNMGR	6822	Unambiguous	Heterogeneous nuclear ribonucleoprotein M OS=Homo sapiens OX=9606 GN=HNRNPM PE=1 SV=3 - [HNRPM_HUMAN]	1	1	P52272		HCD	1	0	1	1	0	0.000207	39	47	1.94	0	60	16	7020000	2	478.708	956.409	0	1.1	30.25	10307	10307	MS2	0/0	0	0	hala.raw
High	A	2	EDTEEYNLR	6826	Unambiguous	Heterogeneous nuclear ribonucleoprotein A3 OS=Homo sapiens OX=9606 GN=HNRNPA3 PE=1 SV=2 - [ROA3_HUMAN]	1	1	P51991		HCD	1	0	1	1	0.001	0.0107	61	51	1.72	0	39	60	5240000	2	584.76	1168.51	0	0.78	30.25	10309	10309	MS2	0/0	0	0	hala.raw
High	A	2	VGVNGFGR	6828	Unambiguous	Glyceraldehyde-3-phosphate dehydrogenase OS=Homo sapiens OX=9606 GN=GAPDH PE=1 SV=3 - [G3P_HUMAN]	1	1	P04406		HCD	1	0	1	1	0.002	0.0295	239	223	1.69	0	67	5	12300000	2	403.219	805.43	0	-1.51	30.25	10310	10310	MS2	0/0	0	0	hala.raw
High	A	2	HTGPNSPDTANDGFVR	5021	Unambiguous	Heterogeneous nuclear ribonucleoprotein H2 OS=Homo sapiens OX=9606 GN=HNRNPH2 PE=1 SV=1 - [HNRH2_HUMAN]|Heterogeneous nuclear ribonucleoprotein H OS=Homo sapiens OX=9606 GN=HNRNPH1 PE=1 SV=4 - [HNRH1_HUMAN]	2	2	P55795;P31943		HCD	1	0	1	1	0	0.000501	100	101	2.42	0	47	60	4330000	3	562.262	1684.77	0	2.08	30.26	10311	10311	MS2	0/0	0	0	hala.raw
High	A	2	HQEGEIFDTEK	5916	Unambiguous	60S ribosomal protein L6 OS=Homo sapiens OX=9606 GN=RPL6 PE=1 SV=3 - [RL6_HUMAN]	1	1	Q02878		HCD	1	0	1	1	0	1.81e-05	79	89	3	0	29	60	5300000	2	666.805	1332.6	0	-2.99	30.26	10313	10313	MS2	0/0	0	0	hala.raw
High	A	2	DSYVGDEAQSK	2007	Unambiguous	Actin, alpha cardiac muscle 1 OS=Homo sapiens OX=9606 GN=ACTC1 PE=1 SV=1 - [ACTC_HUMAN]|Actin, cytoplasmic 1 OS=Homo sapiens OX=9606 GN=ACTB PE=1 SV=1 - [ACTB_HUMAN]	6	2	P68032;P60709		HCD	1	0	1	1	0	0.000477	60	56	1.7	0	49	17	8440000	2	599.766	1198.52	0	1.72	30.26	10315	10315	MS2	0/0	0	0	hala.raw
High	A	2	LQSIGTENTEENR	4724	Unambiguous	Fructose-bisphosphate aldolase A OS=Homo sapiens OX=9606 GN=ALDOA PE=1 SV=2 - [ALDOA_HUMAN]	1	1	P04075		HCD	1	0	1	1	0	2.99e-07	156	148	3.12	0	40	60	5950000	2	745.858	1490.71	0	0.56	30.27	10316	10316	MS2	0/0	0	0	hala.raw
High	A	2	AYTNFDAER	6443	Unambiguous	Annexin A2 OS=Homo sapiens OX=9606 GN=ANXA2 PE=1 SV=2 - [ANXA2_HUMAN]	2	1	P07355		HCD	1	0	1	1	0	0.00676	61	58	1.5	0	58	9	9300000	2	543.747	1086.49	0	1.96	30.27	10318	10318	MS2	0/0	0	0	hala.raw
Middle	A	2	GPAYGLSR	4309	Unambiguous	Transgelin-2 OS=Homo sapiens OX=9606 GN=TAGLN2 PE=1 SV=3 - [TAGL2_HUMAN]	1	1	P37802		HCD	1	0	1	1	0.035	0.37	195	184	1.22	0	44	47	2120000	2	410.72	820.433	0	1.92	30.27	10319	10319	MS2	0/0	0	0	hala.raw
High	A	2	AQYEDIANR	4800	Unambiguous	Keratin, type II cytoskeletal 8 OS=Homo sapiens OX=9606 GN=KRT8 PE=1 SV=7 - [K2C8_HUMAN]	2	1	P05787		HCD	1	0	1	1	0	0.00519	138	131	1.35	0	64	9	12100000	2	540.26	1079.51	0	1.46	30.28	10321	10321	MS2	0/0	0	0	hala.raw
High	A	2	NLDDGIDDER	6846	Unambiguous	Polyadenylate-binding protein 1 OS=Homo sapiens OX=9606 GN=PABPC1 PE=1 SV=2 - [PABP1_HUMAN]	2	1	P11940		HCD	1	0	1	1	0	0.000358	31	32	2.38	0	41	60	6440000	2	581.255	1161.5	0	1.35	30.28	10322	10322	MS2	0/0	0	0	hala.raw
Middle	A	2	EIFDSR	5463	Unambiguous	Alpha-enolase OS=Homo sapiens OX=9606 GN=ENO1 PE=1 SV=2 - [ENOA_HUMAN]	1	1	P06733		HCD	1	0	1	1	0.022	0.255	99	125	1.34	0	48	35	3820000	2	383.69	766.374	0	0.8	30.28	10323	10323	MS2	0/0	0	0	hala.raw
High	A	2	LVAGEMGQNEPDQGGQR	2680	Unambiguous	3-hydroxyacyl-CoA dehydrogenase type-2 OS=Homo sapiens OX=9606 GN=HSD17B10 PE=1 SV=3 - [HCD2_HUMAN]	1	1	Q99714		HCD	1	0	1	1	0	0.000792	103	107	1.87	0	71	60	1370000	2	893.415	1785.82	0	2.04	30.29	10327	10327	MS2	0/0	0	0	hala.raw
High	A	2	TNVVTMPTAHPR	4021	Unambiguous	Treacle protein OS=Homo sapiens OX=9606 GN=TCOF1 PE=1 SV=3 - [TCOF_HUMAN]	1	1	Q13428		HCD	1	0	1	1	0.002	0.0264	168	162	2.02	0	36	60	4270000	2	662.351	1323.69	0.01	7.96	30.29	10328	10328	MS2	0/0	0	0	hala.raw
High	A	2	ASGNYATVISHNPETK	6861	Unambiguous	60S ribosomal protein L8 OS=Homo sapiens OX=9606 GN=RPL8 PE=1 SV=2 - [RL8_HUMAN]	1	1	P62917		HCD	1	0	1	1	0	4.97e-05	188	195	2.33	0	48	60	5310000	2	844.917	1688.83	0	1.16	30.3	10330	10330	MS2	0/0	0	0	hala.raw
Middle	A	2	MQSFGMK	6863	Unambiguous	D-3-phosphoglycerate dehydrogenase OS=Homo sapiens OX=9606 GN=PHGDH PE=1 SV=4 - [SERA_HUMAN]	1	1	O43175		HCD	1	0	1	1	0.012	0.167	41	48	0.93	0	64	18	5170000	2	414.691	828.375	0	1.11	30.3	10331	10331	MS2	0/0	0	0	hala.raw
Middle	A	2	LLPHIR	6867	Unambiguous	60S acidic ribosomal protein P0 OS=Homo sapiens OX=9606 GN=RPLP0 PE=1 SV=1 - [RLA0_HUMAN]	1	1	P05388		HCD	1	0	1	1	0.02	0.241	29	36	1	0	69	60	1550000	2	374.745	748.484	0	0.88	30.3	10333	10333	MS2	0/0	0	0	hala.raw
High	A	2	YLAEVAcGDDRK	4620	Unambiguous	14-3-3 protein theta OS=Homo sapiens OX=9606 GN=YWHAQ PE=1 SV=1 - [1433T_HUMAN]	1	1	P27348	C7(Carbamidomethyl)	HCD	1	0	1	1	0.002	0.0258	135	136	1.8	1	44	60	1770000	2	698.832	1396.66	0	3.26	30.31	10337	10337	MS2	0/0	0	0	hala.raw
High	A	2	DVMPEVNK	6877	Unambiguous	Glucose-6-phosphate isomerase OS=Homo sapiens OX=9606 GN=GPI PE=1 SV=4 - [G6PI_HUMAN]	1	1	P06744		HCD	1	0	1	1	0.001	0.0189	111	101	1.64	0	60	13	5360000	2	466.233	931.458	0	3.11	30.32	10340	10340	MS2	0/0	0	0	hala.raw
High	A	2	SVTEQGAELSNEER	5101	Unambiguous	14-3-3 protein zeta/delta OS=Homo sapiens OX=9606 GN=YWHAZ PE=1 SV=1 - [1433Z_HUMAN]	1	1	P63104		HCD	1	0	1	1	0	1.47e-07	102	90	2.9	0	43	60	7840000	2	774.86	1548.71	0	-0.33	30.33	10343	10343	MS2	0/0	0	0	hala.raw
High	A	2	EAPPMEKPEVVK	5934	Unambiguous	40S ribosomal protein S15 OS=Homo sapiens OX=9606 GN=RPS15 PE=1 SV=2 - [RS15_HUMAN]	1	1	P62841		HCD	1	0	1	1	0	0.005	199	160	1.8	0	71	60	2240000	2	677.36	1353.71	0	3.93	30.34	10350	10350	MS2	0/0	0	0	hala.raw
High	A	2	AAAAAWEEPSSGNGTAR	6893	Unambiguous	Protein RCC2 OS=Homo sapiens OX=9606 GN=RCC2 PE=1 SV=2 - [RCC2_HUMAN]	1	1	Q9P258		HCD	1	0	1	1	0	2.03e-06	114	98	2.75	0	27	60	2400000	2	823.384	1645.76	0	1.96	30.35	10351	10351	MS2	0/0	0	0	hala.raw
High	A	2	AQMVQEDLEK	6895	Unambiguous	Moesin OS=Homo sapiens OX=9606 GN=MSN PE=1 SV=3 - [MOES_HUMAN]	1	1	P26038		HCD	1	0	1	1	0	0.000204	152	150	1.8	0	10	6	22300000	2	595.79	1190.57	0	1.09	30.35	10353	10353	MS2	0/0	0	0	hala.raw
High	A	2	VTLTSEEEAR	4815	Unambiguous	L-lactate dehydrogenase A chain OS=Homo sapiens OX=9606 GN=LDHA PE=1 SV=2 - [LDHA_HUMAN]	1	1	P00338		HCD	1	0	1	1	0	1.82e-05	245	223	2.14	0	32	6	18400000	2	567.786	1134.57	0	1.19	30.36	10356	10356	MS2	0/0	0	0	hala.raw
High	A	2	YESLTDPSK	4512	Unambiguous	Heat shock protein HSP 90-beta OS=Homo sapiens OX=9606 GN=HSP90AB1 PE=1 SV=4 - [HS90B_HUMAN]|Heat shock protein HSP 90-alpha OS=Homo sapiens OX=9606 GN=HSP90AA1 PE=1 SV=5 - [HS90A_HUMAN]|Putative heat shock protein HSP 90-beta 4 OS=Homo sapiens OX=9606 GN=HSP90AB4P PE=5 SV=1 - [H90B4_HUMAN]	5	2	P08238;P07900		HCD	1	0	1	1	0	0.00192	108	113	1.63	0	29	27	6530000	2	520.25	1039.49	0	-0.77	30.36	10357	10357	MS2	0/0	0	0	hala.raw
High	A	2	cYEMASHLR	4981	Unambiguous	Profilin-1 OS=Homo sapiens OX=9606 GN=PFN1 PE=1 SV=2 - [PROF1_HUMAN]	1	1	P07737	C1(Carbamidomethyl)	HCD	1	0	1	1	0.005	0.067	66	61	1.34	0	53	29	4140000	3	389.508	1166.51	0	0.93	30.36	10358	10358	MS2	0/0	0	0	hala.raw
High	A	2	GVEEEEEDGEMRE	4730	Unambiguous	Small nuclear ribonucleoprotein F OS=Homo sapiens OX=9606 GN=SNRPF PE=1 SV=1 - [RUXF_HUMAN]	1	1	P62306		HCD	1	0	1	1	0	0.000291	7	4	2.14	1	38	60	1520000	2	769.302	1537.6	0	0.49	30.36	10361	10361	MS2	0/0	0	0	hala.raw
High	A	2	LSSEMNTSTVNSAR	5329	Unambiguous	Lamin-B1 OS=Homo sapiens OX=9606 GN=LMNB1 PE=1 SV=2 - [LMNB1_HUMAN]	1	1	P20700		HCD	1	0	1	1	0	0.00133	122	124	1.76	0	72	60	2130000	2	748.854	1496.7	0	-0.11	30.37	10363	10363	MS2	0/0	0	0	hala.raw
High	A	2	LPPNTNDEVDEDPTGNK	6496	Unambiguous	Splicing factor 3B subunit 3 OS=Homo sapiens OX=9606 GN=SF3B3 PE=1 SV=4 - [SF3B3_HUMAN]	1	1	Q15393		HCD	1	0	1	1	0.008	0.121	90	85	0.76	0	0	60	909000	2	927.924	1854.84	0	3.34	30.37	10366	10366	MS2	0/0	0	0	hala.raw
High	A	2	QADVNLVNAK	6505	Unambiguous	D-3-phosphoglycerate dehydrogenase OS=Homo sapiens OX=9606 GN=PHGDH PE=1 SV=4 - [SERA_HUMAN]	1	1	O43175		HCD	1	0	1	1	0	0.00791	187	186	2.33	0	55	35	5520000	2	536.295	1071.58	0	3	30.38	10369	10369	MS2	0/0	0	0	hala.raw
Middle	A	2	LLHGGVAVSSR	6375	Unambiguous	Phosphatidylinositol 4-kinase beta OS=Homo sapiens OX=9606 GN=PI4KB PE=1 SV=1 - [PI4KB_HUMAN]	1	1	Q9UBF8		HCD	1	0	1	1	0.034	0.366	103	86	1.2	0	48	27	8790000	2	548.32	1095.63	0	5.6	30.38	10372	10372	MS2	0/0	0	0	hala.raw
High	A	2	VIGSGcNLDSAR	5297	Unambiguous	L-lactate dehydrogenase B chain OS=Homo sapiens OX=9606 GN=LDHB PE=1 SV=2 - [LDHB_HUMAN]|L-lactate dehydrogenase A chain OS=Homo sapiens OX=9606 GN=LDHA PE=1 SV=2 - [LDHA_HUMAN]	4	2	P07195;P00338	C6(Carbamidomethyl)	HCD	1	0	1	1	0	2.02e-06	152	123	2.33	0	6	9	36000000	2	624.804	1248.6	0	-0.12	30.39	10374	10374	MS2	0/0	0	0	hala.raw
Middle	A	2	EVSTYIK	150	Unambiguous	Elongation factor 1-alpha 1 OS=Homo sapiens OX=9606 GN=EEF1A1 PE=1 SV=1 - [EF1A1_HUMAN]	2	1	P68104		HCD	1	0	1	1	0.016	0.214	116	125	0.96	0	41	15	7940000	2	420.23	839.453	0	2.16	30.39	10375	10375	MS2	0/0	0	0	hala.raw
High	A	2	EFHLNESGDPSSK	5816	Unambiguous	Protein SET OS=Homo sapiens OX=9606 GN=SET PE=1 SV=3 - [SET_HUMAN]	2	1	Q01105		HCD	1	0	1	1	0	0.00134	88	85	2.34	0	40	60	5890000	2	723.829	1446.65	0	1.41	30.39	10376	10376	MS2	0/0	0	0	hala.raw
Middle	A	2	DEmAGEGFFPDQAR	6943	Unambiguous	Torsin-4A OS=Homo sapiens OX=9606 GN=TOR4A PE=1 SV=2 - [TOR4A_HUMAN]	1	1	Q9NXH8	M3(Oxidation)	HCD	1	0	1	1	0.014	0.192	29	20	1.07	0	35	60	8950000	2	793.334	1585.66	0	1.24	30.4	10380	10380	MS2	0/0	0	0	hala.raw
High	A	2	ELVLDNSR	6947	Unambiguous	Acidic leucine-rich nuclear phosphoprotein 32 family member A OS=Homo sapiens OX=9606 GN=ANP32A PE=1 SV=1 - [AN32A_HUMAN]	1	1	P39687		HCD	1	0	1	1	0.001	0.0186	183	206	1.72	0	63	10	7030000	2	473.254	945.5	0	0.4	30.4	10382	10382	MS2	0/0	0	0	hala.raw
High	A	2	VEILANDQGNR	5811	Unambiguous	Heat shock cognate 71 kDa protein OS=Homo sapiens OX=9606 GN=HSPA8 PE=1 SV=1 - [HSP7C_HUMAN]|Endoplasmic reticulum chaperone BiP OS=Homo sapiens OX=9606 GN=HSPA5 PE=1 SV=2 - [BIP_HUMAN]|Heat shock 70 kDa protein 1-like OS=Homo sapiens OX=9606 GN=HSPA1L PE=1 SV=2 - [HS71L_HUMAN]|Heat shock 70 kDa protein 1A OS=Homo sapiens OX=9606 GN=HSPA1A PE=1 SV=1 - [HS71A_HUMAN]|Heat shock 70 kDa protein 6 OS=…	7	3	P11142;P11021;P0DMV8		HCD	1	0	1	1	0	0.000641	135	154	2.47	0	31	16	22000000	2	614.819	1228.63	0	1.99	30.41	10387	10387	MS2	0/0	0	0	hala.raw
High	A	2	VEIIANDQGNR	5811	Unambiguous	Heat shock cognate 71 kDa protein OS=Homo sapiens OX=9606 GN=HSPA8 PE=1 SV=1 - [HSP7C_HUMAN]|Endoplasmic reticulum chaperone BiP OS=Homo sapiens OX=9606 GN=HSPA5 PE=1 SV=2 - [BIP_HUMAN]|Heat shock 70 kDa protein 1-like OS=Homo sapiens OX=9606 GN=HSPA1L PE=1 SV=2 - [HS71L_HUMAN]|Heat shock 70 kDa protein 1A OS=Homo sapiens OX=9606 GN=HSPA1A PE=1 SV=1 - [HS71A_HUMAN]|Heat shock 70 kDa protein 6 OS=…	7	3	P11142;P11021;P0DMV8		HCD	1	0	1	2	0	0.000641	135	154	2.47	0	31	16	22000000	2	614.819	1228.63	0	1.99	30.41	10387	10387	MS2	0/0	0	0	hala.raw
High	A	2	EIAQDFK	4854	Unambiguous	Histone H3.1 OS=Homo sapiens OX=9606 GN=HIST1H3A PE=1 SV=2 - [H31_HUMAN]	4	1	P68431		HCD	1	0	1	1	0.004	0.0598	134	162	1.38	0	17	5	28700000	2	425.719	850.432	0	1.34	30.42	10390	10390	MS2	0/0	0	0	hala.raw
High	A	2	ESWEMNSEEK	6965	Unambiguous	Peptidyl-prolyl cis-trans isomerase FKBP4 OS=Homo sapiens OX=9606 GN=FKBP4 PE=1 SV=3 - [FKBP4_HUMAN]	1	1	Q02790		HCD	1	0	1	1	0.002	0.0343	25	16	1.26	0	78	60	1710000	2	634.761	1268.51	0	3.49	30.42	10392	10392	MS2	0/0	0	0	hala.raw
High	A	2	EVATNSELVQSGK	4862	Unambiguous	Keratin, type I cytoskeletal 17 OS=Homo sapiens OX=9606 GN=KRT17 PE=1 SV=2 - [K1C17_HUMAN]	2	1	Q04695		HCD	1	0	1	1	0	1.6e-05	236	232	2.39	0	13	45	15600000	2	681.35	1361.69	0	1.32	30.42	10393	10393	MS2	0/0	0	0	hala.raw
Middle	A	2	NMMAAcDPR	4343	Unambiguous	Tubulin beta-2A chain OS=Homo sapiens OX=9606 GN=TUBB2A PE=1 SV=1 - [TBB2A_HUMAN]|Tubulin beta-3 chain OS=Homo sapiens OX=9606 GN=TUBB3 PE=1 SV=2 - [TBB3_HUMAN]|Tubulin beta-4A chain OS=Homo sapiens OX=9606 GN=TUBB4A PE=1 SV=2 - [TBB4A_HUMAN]|Tubulin beta-4B chain OS=Homo sapiens OX=9606 GN=TUBB4B PE=1 SV=1 - [TBB4B_HUMAN]|Tubulin beta chain OS=Homo sapiens OX=9606 GN=TUBB PE=1 SV=2 - [TBB5_HUMAN…	9	3	P68371;P07437;Q9BUF5	C6(Carbamidomethyl)	HCD	1	0	1	1	0.01	0.138	14	13	1.61	0	54	34	6390000	2	533.218	1065.43	0	0.49	30.43	10394	10394	MS2	0/0	0	0	hala.raw
High	A	2	VMEYINR	6971	Unambiguous	Clathrin heavy chain 1 OS=Homo sapiens OX=9606 GN=CLTC PE=1 SV=5 - [CLH1_HUMAN]	1	1	Q00610		HCD	1	0	1	1	0.007	0.0982	126	118	0.99	0	58	10	6360000	2	462.736	924.464	0	3.5	30.43	10395	10395	MS2	0/0	0	0	hala.raw
High	A	2	INISEGNcPER	5425	Unambiguous	Poly(rC)-binding protein 1 OS=Homo sapiens OX=9606 GN=PCBP1 PE=1 SV=2 - [PCBP1_HUMAN]|Poly(rC)-binding protein 2 OS=Homo sapiens OX=9606 GN=PCBP2 PE=1 SV=1 - [PCBP2_HUMAN]	3	2	Q15365;Q15366	C8(Carbamidomethyl)	HCD	1	0	1	1	0	0.000193	96	90	2.13	0	50	60	6450000	2	644.801	1288.6	0	-0.05	30.43	10397	10397	MS2	0/0	0	0	hala.raw
High	A	2	LELQGPR	6540	Unambiguous	Nucleolin OS=Homo sapiens OX=9606 GN=NCL PE=1 SV=3 - [NUCL_HUMAN]	1	1	P19338		HCD	1	0	1	1	0	0.00733	76	78	1.45	0	56	22	4030000	2	406.736	812.464	0	2.02	30.43	10398	10398	MS2	0/0	0	0	hala.raw
High	A	2	MDSTANEVEAVK	6072	Unambiguous	Protein disulfide-isomerase OS=Homo sapiens OX=9606 GN=P4HB PE=1 SV=3 - [PDIA1_HUMAN]	1	1	P07237		HCD	1	0	1	1	0	8.56e-05	109	114	1.95	0	58	60	3070000	2	647.304	1293.6	0	1.69	30.44	10399	10399	MS2	0/0	0	0	hala.raw
High	A	2	LMSNLDSNR	5071	Unambiguous	Protein S100-A4 OS=Homo sapiens OX=9606 GN=S100A4 PE=1 SV=1 - [S10A4_HUMAN]	1	1	P26447		HCD	1	0	1	1	0	0.000401	142	138	1.78	0	26	9	14800000	2	525.256	1049.51	0	0.79	30.44	10400	10400	MS2	0/0	0	0	hala.raw
High	A	2	HEQNIDcGGGYVK	3439	Unambiguous	Calreticulin OS=Homo sapiens OX=9606 GN=CALR PE=1 SV=1 - [CALR_HUMAN]	1	1	P27797	C7(Carbamidomethyl)	HCD	1	0	1	1	0	0.00193	62	63	2.23	0	29	60	3380000	2	738.831	1476.66	0	0.96	30.45	10406	10406	MS2	0/0	0	0	hala.raw
High	A	2	HIYYITGETK	6994	Unambiguous	Heat shock protein HSP 90-alpha OS=Homo sapiens OX=9606 GN=HSP90AA1 PE=1 SV=5 - [HS90A_HUMAN]	2	1	P07900		HCD	1	0	1	1	0	0.00215	148	143	1.78	0	23	6	32200000	2	612.818	1224.63	0	1.67	30.45	10407	10407	MS2	0/0	0	0	hala.raw
High	A	2	FcLDNGAK	6163	Unambiguous	Phosphoglycerate kinase 1 OS=Homo sapiens OX=9606 GN=PGK1 PE=1 SV=3 - [PGK1_HUMAN]	1	1	P00558	C2(Carbamidomethyl)	HCD	1	0	1	2	0.001	0.0152	88	86	0.92	0	57	9	5470000	2	462.717	924.426	0	1.52	30.45	10408	10408	MS2	0/0	0	0	hala.raw
Middle	A	2	EEQRPLK	7002	Unambiguous	Transmembrane protein 151A OS=Homo sapiens OX=9606 GN=TMEM151A PE=2 SV=1 - [T151A_HUMAN]	1	1	Q8N4L1		HCD	1	0	1	1	0.048	0.459	120	132	0.89	0	32	11	17700000	2	450.247	899.486	0	-9.36	30.46	10411	10411	MS2	0/0	0	0	hala.raw
High	A	2	VHQLYETIQR	7004	Unambiguous	Dynactin subunit 2 OS=Homo sapiens OX=9606 GN=DCTN2 PE=1 SV=4 - [DCTN2_HUMAN]	1	1	Q13561		HCD	1	0	1	1	0.002	0.0319	208	240	1.68	0	57	60	5790000	2	643.847	1286.69	0	0.69	30.46	10412	10412	MS2	0/0	0	0	hala.raw
High	A	2	QEYDESGPSIVHR	5898	Unambiguous	Actin, cytoplasmic 1 OS=Homo sapiens OX=9606 GN=ACTB PE=1 SV=1 - [ACTB_HUMAN]	7	1	P60709		HCD	1	0	1	1	0	2.21e-05	91	103	2.57	0	7	6	47200000	3	506.24	1516.71	0	1.54	30.46	10414	10414	MS2	0/0	0	0	hala.raw
High	A	2	TADGIVSHLK	7014	Unambiguous	Protein disulfide-isomerase A3 OS=Homo sapiens OX=9606 GN=PDIA3 PE=1 SV=4 - [PDIA3_HUMAN]	1	1	P30101		HCD	1	0	1	1	0	0.00792	138	133	1.57	0	59	16	5430000	2	520.791	1040.58	0	1.88	30.47	10418	10418	MS2	0/0	0	0	hala.raw
Middle	A	2	MPSGEFAR	5403	Unambiguous	Proliferating cell nuclear antigen OS=Homo sapiens OX=9606 GN=PCNA PE=1 SV=1 - [PCNA_HUMAN]	1	1	P12004		HCD	1	0	1	1	0.031	0.344	102	89	1.15	0	65	20	3470000	2	447.711	894.415	0	1.02	30.48	10420	10420	MS2	0/0	0	0	hala.raw
High	A	2	ADEASELAcPTPK	7018	Unambiguous	Fatty acid synthase OS=Homo sapiens OX=9606 GN=FASN PE=1 SV=3 - [FAS_HUMAN]	1	1	P49327	C9(Carbamidomethyl)	HCD	1	0	1	1	0	0.000142	83	76	1.91	0	56	60	2420000	2	694.823	1388.64	0	1.48	30.48	10421	10421	MS2	0/0	0	0	hala.raw
Middle	A	2	GSSEQAESDNMDVPPEDDSK	5856	Unambiguous	Interleukin enhancer-binding factor 3 OS=Homo sapiens OX=9606 GN=ILF3 PE=1 SV=3 - [ILF3_HUMAN]	1	1	Q12906		HCD	1	0	1	1	0.022	0.254	13	10	0.58	0	68	60	509000	2	1068.93	2136.86	0	3.56	30.48	10422	10422	MS2	0/0	0	0	hala.raw
High	A	2	EDLQELNDR	7022	Unambiguous	Prelamin-A/C OS=Homo sapiens OX=9606 GN=LMNA PE=1 SV=1 - [LMNA_HUMAN]	1	1	P02545		HCD	1	0	1	1	0	0.000209	94	99	2.18	0	35	8	19200000	2	566.268	1131.53	0	0.69	30.48	10423	10423	MS2	0/0	0	0	hala.raw
High	A	2	SEPIPESNDGPVK	7024	Unambiguous	Protein disulfide-isomerase A3 OS=Homo sapiens OX=9606 GN=PDIA3 PE=1 SV=4 - [PDIA3_HUMAN]	1	1	P30101		HCD	1	0	1	1	0	0.000402	138	136	2.02	0	55	56	10200000	2	684.836	1368.66	0	0.19	30.48	10424	10424	MS2	0/0	0	0	hala.raw
High	A	2	YIcENQDSISSK	4654	Unambiguous	Serum albumin OS=Homo sapiens OX=9606 GN=ALB PE=1 SV=2 - [ALBU_HUMAN]	1	1	P02768	C3(Carbamidomethyl)	HCD	1	0	1	1	0.008	0.115	65	66	0.88	0	42	60	4680000	2	722.325	1443.64	0	-0.04	30.48	10425	10425	MS2	0/0	0	0	hala.raw
High	A	2	AGFAGDDAPR	3795	Unambiguous	Actin, alpha cardiac muscle 1 OS=Homo sapiens OX=9606 GN=ACTC1 PE=1 SV=1 - [ACTC_HUMAN]|Actin, cytoplasmic 1 OS=Homo sapiens OX=9606 GN=ACTB PE=1 SV=1 - [ACTB_HUMAN]	10	2	P68032;P60709		HCD	1	0	1	1	0	0.000405	87	97	1.84	0	41	4	30000000	2	488.729	976.45	0	1.69	30.49	10429	10429	MS2	0/0	0	0	hala.raw
Middle	A	2	ISSSSFSR	3579	Selected	Keratin, type II cytoskeletal 8 OS=Homo sapiens OX=9606 GN=KRT8 PE=1 SV=7 - [K2C8_HUMAN]	1	1	P05787		HCD	0	0	1	1	0.028	0.322	104	116	0.71	0	81	13	2960000	2	435.719	870.431	0	-0.32	30.49	10430	10430	MS2	0/0	0	0	hala.raw
Middle	A	2	LSSSFSSR	3580	Rejected	Bromodomain adjacent to zinc finger domain protein 1A OS=Homo sapiens OX=9606 GN=BAZ1A PE=1 SV=2 - [BAZ1A_HUMAN]	1	1	Q9NRL2		HCD		0	2	2	0.029	0.325	104	116	0.71	0	81	13	2960000	2	435.719	870.431	0	-0.32	30.49	10430	10430	MS2	0/0	0	0	hala.raw
High	A	2	GVDLQENNPASR	5580	Unambiguous	Ras-related protein Rab-5C OS=Homo sapiens OX=9606 GN=RAB5C PE=1 SV=2 - [RAB5C_HUMAN]	1	1	P51148		HCD	1	0	1	1	0	0.00508	126	132	1.98	0	79	60	732000	2	650.319	1299.63	0	1.22	30.5	10433	10433	MS2	0/0	0	0	hala.raw
High	A	2	KLDEAVAEAHLGK	7046	Unambiguous	Adenosylhomocysteinase OS=Homo sapiens OX=9606 GN=AHCY PE=1 SV=4 - [SAHH_HUMAN]	1	1	P23526		HCD	1	0	1	1	0	0.00261	160	170	2.22	1	21	27	8420000	3	460.921	1380.75	0	1	30.51	10437	10437	MS2	0/0	0	0	hala.raw
High	A	2	AVVIVDDR	7050	Unambiguous	Non-POU domain-containing octamer-binding protein OS=Homo sapiens OX=9606 GN=NONO PE=1 SV=4 - [NONO_HUMAN]|Splicing factor, proline- and glutamine-rich OS=Homo sapiens OX=9606 GN=SFPQ PE=1 SV=2 - [SFPQ_HUMAN]	2	2	Q15233;P23246		HCD	1	0	1	1	0.001	0.011	158	165	1.66	0	64	10	7450000	2	443.753	886.5	0	0.21	30.51	10439	10439	MS2	0/0	0	0	hala.raw
High	A	2	SQDIYLR	7052	Unambiguous	60S ribosomal protein L18 OS=Homo sapiens OX=9606 GN=RPL18 PE=1 SV=2 - [RL18_HUMAN]	1	1	Q07020		HCD	1	0	1	1	0.005	0.065	150	155	1.52	0	50	21	6000000	2	447.738	894.468	0	0.5	30.52	10440	10440	MS2	0/0	0	0	hala.raw
High	A	2	IIAPPER	4510	Unambiguous	Actin, alpha cardiac muscle 1 OS=Homo sapiens OX=9606 GN=ACTC1 PE=1 SV=1 - [ACTC_HUMAN]|Beta-actin-like protein 2 OS=Homo sapiens OX=9606 GN=ACTBL2 PE=1 SV=2 - [ACTBL_HUMAN]|Actin, cytoplasmic 1 OS=Homo sapiens OX=9606 GN=ACTB PE=1 SV=1 - [ACTB_HUMAN]	7	3	P68032;Q562R1;P60709		HCD	1	0	1	1	0.001	0.0174	61	60	1.53	0	18	10	17000000	2	398.24	795.473	0	0.66	30.53	10444	10444	MS2	0/0	0	0	hala.raw
High	A	2	LYGSAGPPPTGEEDTAEK	6644	Unambiguous	Endoplasmic reticulum chaperone BiP OS=Homo sapiens OX=9606 GN=HSPA5 PE=1 SV=2 - [BIP_HUMAN]	1	1	P11021		HCD	1	0	1	1	0	2.27e-05	119	127	2.45	0	0	60	4740000	2	909.925	1818.84	0	1.6	30.53	10448	10448	MS2	0/0	0	0	hala.raw
High	A	2	LASYLDR	7069	Unambiguous	Keratin, type I cytoskeletal 18 OS=Homo sapiens OX=9606 GN=KRT18 PE=1 SV=2 - [K1C18_HUMAN]	1	1	P05783		HCD	1	0	1	1	0.001	0.0167	159	170	1.59	0	32	15	9780000	2	419.227	837.448	0	1.38	30.54	10450	10450	MS2	0/0	0	0	hala.raw
Middle	A	2	AAEAAAAPAESAAPAAGEEPSKEEGEPK	5053	Unambiguous	Brain acid soluble protein 1 OS=Homo sapiens OX=9606 GN=BASP1 PE=1 SV=2 - [BASP1_HUMAN]	1	1	P80723		HCD	1	0	1	1	0.018	0.226	126	105	1.79	1	10	60	955000	3	879.416	2636.23	0	0.77	30.54	10452	10452	MS2	0/0	0	0	hala.raw
High	A	2	VDNDENEHQLSLR	5397	Unambiguous	Nucleophosmin OS=Homo sapiens OX=9606 GN=NPM1 PE=1 SV=2 - [NPM_HUMAN]	1	1	P06748		HCD	1	0	1	1	0	5.73e-06	147	114	2.81	0	15	54	11800000	2	784.87	1568.73	0	1.18	30.55	10457	10457	MS2	0/0	0	0	hala.raw
High	A	2	QAGPASVPLR	7086	Unambiguous	Protein disulfide-isomerase A3 OS=Homo sapiens OX=9606 GN=PDIA3 PE=1 SV=4 - [PDIA3_HUMAN]	1	1	P30101		HCD	1	0	1	1	0	7.53e-05	112	109	2.27	0	45	8	16400000	2	498.285	995.562	0	-1.44	30.56	10460	10460	MS2	0/0	0	0	hala.raw
High	A	2	FNTANDDNVTQVR	7090	Unambiguous	Catalase OS=Homo sapiens OX=9606 GN=CAT PE=1 SV=3 - [CATA_HUMAN]	1	1	P04040		HCD	1	0	1	1	0	1.23e-06	123	126	3.01	0	24	60	4610000	2	747.353	1493.7	0	0.38	30.56	10462	10462	MS2	0/0	0	0	hala.raw
High	A	2	STAGDTHLGGEDFDNR	6272	Unambiguous	Heat shock cognate 71 kDa protein OS=Homo sapiens OX=9606 GN=HSPA8 PE=1 SV=1 - [HSP7C_HUMAN]	2	1	P11142		HCD	1	0	1	1	0	0.00106	43	41	2.27	0	51	60	4180000	2	846.368	1691.73	0	2.08	30.57	10465	10465	MS2	0/0	0	0	hala.raw
High	A	2	SGQGAFGNMcR	6104	Unambiguous	60S ribosomal protein L4 OS=Homo sapiens OX=9606 GN=RPL4 PE=1 SV=5 - [RL4_HUMAN]	1	1	P36578	C10(Carbamidomethyl)	HCD	1	0	1	1	0	0.00433	35	31	1.71	0	74	60	3240000	2	592.751	1184.49	0	1.11	30.57	10468	10468	MS2	0/0	0	0	hala.raw
High	A	2	VDNDENEHQLSLR	5397	Unambiguous	Nucleophosmin OS=Homo sapiens OX=9606 GN=NPM1 PE=1 SV=2 - [NPM_HUMAN]	1	1	P06748		HCD	1	0	1	1	0	3.09e-05	148	118	2.35	0	38	14	19500000	3	523.582	1568.73	0	0.4	30.59	10473	10473	MS2	0/0	0	0	hala.raw
Middle	A	2	DGQVINETSQHHDDLE	6133	Unambiguous	Vimentin OS=Homo sapiens OX=9606 GN=VIM PE=1 SV=4 - [VIME_HUMAN]	1	1	P08670		HCD	1	0	1	1	0.014	0.191	73	54	1.42	0	39	60	1740000	2	918.902	1836.8	0	-1.82	30.6	10478	10478	MS2	0/0	0	0	hala.raw
High	A	2	LQDAEIAR	4069	Unambiguous	Protein S100-A6 OS=Homo sapiens OX=9606 GN=S100A6 PE=1 SV=1 - [S10A6_HUMAN]	1	1	P06703		HCD	1	0	1	1	0.003	0.0463	149	160	1.3	0	48	19	5330000	2	458.248	915.489	0	-0.91	30.6	10480	10480	MS2	0/0	0	0	hala.raw
Middle	A	2	VVAVDcGIK	6662	Unambiguous	Carbamoyl-phosphate synthase [ammonia], mitochondrial OS=Homo sapiens OX=9606 GN=CPS1 PE=1 SV=2 - [CPSM_HUMAN]	1	1	P31327	C6(Carbamidomethyl)	HCD	1	0	1	1	0.018	0.229	271	270	1.11	0	70	11	3110000	2	480.763	960.519	0	0.66	30.6	10481	10481	MS2	0/0	0	0	hala.raw
High	A	2	EDMAALEK	5401	Unambiguous	Tubulin alpha-1A chain OS=Homo sapiens OX=9606 GN=TUBA1A PE=1 SV=1 - [TBA1A_HUMAN]|Tubulin alpha-1B chain OS=Homo sapiens OX=9606 GN=TUBA1B PE=1 SV=1 - [TBA1B_HUMAN]|Tubulin alpha-1C chain OS=Homo sapiens OX=9606 GN=TUBA1C PE=1 SV=1 - [TBA1C_HUMAN]|Tubulin alpha-4A chain OS=Homo sapiens OX=9606 GN=TUBA4A PE=1 SV=1 - [TBA4A_HUMAN]	4	2	Q9BQE3;P68366		HCD	1	0	1	1	0.004	0.0607	89	92	1.33	0	34	18	8270000	2	453.716	906.424	0	0.72	30.61	10483	10483	MS2	0/0	0	0	hala.raw
High	A	2	INSITVDNcK	7128	Unambiguous	Adenylyl cyclase-associated protein 1 OS=Homo sapiens OX=9606 GN=CAP1 PE=1 SV=5 - [CAP1_HUMAN]	1	1	Q01518	C9(Carbamidomethyl)	HCD	1	0	1	1	0.002	0.0331	201	209	1.5	0	50	60	3650000	2	582.29	1163.57	0	0.22	30.62	10486	10486	MS2	0/0	0	0	hala.raw
Middle	A	2	DIGAIAR	5430	Unambiguous	Dihydropyrimidinase-related protein 5 OS=Homo sapiens OX=9606 GN=DPYSL5 PE=1 SV=1 - [DPYL5_HUMAN]	1	1	Q9BPU6		HCD	1	0	1	2	0.047	0.452	219	215	1.69	0	6	16	11700000	2	358.209	715.41	0	0.36	30.62	10489	10489	MS2	0/0	0	0	hala.raw
High	A	2	SPPPGMGLNQNR	5794	Unambiguous	Splicing factor, proline- and glutamine-rich OS=Homo sapiens OX=9606 GN=SFPQ PE=1 SV=2 - [SFPQ_HUMAN]	1	1	P23246		HCD	1	0	1	1	0	0.00216	165	160	1.75	0	50	60	2770000	2	634.319	1267.63	0	7.33	30.62	10490	10490	MS2	0/0	0	0	hala.raw
High	A	2	AAEAAAAPAESAAPAAGEEPSK	5029	Unambiguous	Brain acid soluble protein 1 OS=Homo sapiens OX=9606 GN=BASP1 PE=1 SV=2 - [BASP1_HUMAN]	1	1	P80723		HCD	1	0	1	1	0	1.26e-05	139	144	2.68	0	0	60	1670000	2	983.972	1966.94	0	0.55	30.62	10491	10491	MS2	0/0	0	0	hala.raw
High	A	2	YRPGTVALR	4616	Unambiguous	Histone H3.1 OS=Homo sapiens OX=9606 GN=HIST1H3A PE=1 SV=2 - [H31_HUMAN]	5	1	P68431		HCD	1	0	1	1	0.003	0.0423	167	173	1.66	0	15	3	59900000	2	516.802	1032.6	0	1.98	30.63	10495	10495	MS2	0/0	0	0	hala.raw
High	A	2	IGAEVYHNLK	6384	Unambiguous	Alpha-enolase OS=Homo sapiens OX=9606 GN=ENO1 PE=1 SV=2 - [ENOA_HUMAN]	1	1	P06733		HCD	1	0	1	1	0	3.4e-05	201	209	2.48	0	26	14	18800000	2	572.311	1143.62	0	-0.38	30.64	10498	10498	MS2	0/0	0	0	hala.raw
Middle	A	2	TNYNDRYDEIR	4760	Unambiguous	60S ribosomal protein L7a OS=Homo sapiens OX=9606 GN=RPL7A PE=1 SV=2 - [RL7A_HUMAN]	1	1	P62424		HCD	1	0	1	1	0.018	0.23	92	77	1.34	1	43	60	1120000	2	729.834	1458.66	0	-0.35	30.65	10501	10501	MS2	0/0	0	0	hala.raw
High	A	2	VGLIAAR	7159	Unambiguous	60S ribosomal protein L8 OS=Homo sapiens OX=9606 GN=RPL8 PE=1 SV=2 - [RL8_HUMAN]	1	1	P62917		HCD	1	0	1	1	0.002	0.0233	90	92	1.4	0	24	60	910000	2	350.229	699.452	0	0.51	30.65	10503	10503	MS2	0/0	0	0	hala.raw
High	A	2	QVLGGLR	6343	Unambiguous	Fibroblast growth factor-binding protein 3 OS=Homo sapiens OX=9606 GN=FGFBP3 PE=1 SV=1 - [FGFP3_HUMAN]	1	1	Q8TAT2		HCD	1	0	1	2	0.003	0.0467	86	85	1.41	0	42	22	8100000	2	371.732	742.457	0	0.21	30.66	10506	10506	MS2	0/0	0	0	hala.raw
Middle	A	2	LMLDGDR	7165	Unambiguous	Plastin-3 OS=Homo sapiens OX=9606 GN=PLS3 PE=1 SV=4 - [PLST_HUMAN]	1	1	P13797		HCD	1	0	1	1	0.011	0.147	140	139	1.13	0	59	37	3310000	2	410.206	819.404	0	1.08	30.66	10507	10507	MS2	0/0	0	0	hala.raw
High	A	2	AFDQIR	5166	Unambiguous	Transketolase OS=Homo sapiens OX=9606 GN=TKT PE=1 SV=3 - [TKT_HUMAN]	2	1	P29401		HCD	1	0	1	1	0.007	0.0959	179	193	0.95	0	82	57	693000	2	375.201	749.394	0	0.39	30.67	10511	10511	MS2	0/0	0	0	hala.raw
High	A	2	AFDQLR	5166	Unambiguous	Transketolase OS=Homo sapiens OX=9606 GN=TKT PE=1 SV=3 - [TKT_HUMAN]	2	1	P29401		HCD	1	0	1	2	0.007	0.0959	179	193	0.95	0	82	57	693000	2	375.201	749.394	0	0.39	30.67	10511	10511	MS2	0/0	0	0	hala.raw
High	A	2	NNTQVLINcR	7174	Unambiguous	Small nuclear ribonucleoprotein Sm D2 OS=Homo sapiens OX=9606 GN=SNRPD2 PE=1 SV=1 - [SMD2_HUMAN]	1	1	P62316	C9(Carbamidomethyl)	HCD	1	0	1	1	0	0.00207	224	215	1.84	0	42	10	16400000	2	616.314	1231.62	0	0.23	30.67	10512	10512	MS2	0/0	0	0	hala.raw
High	A	2	NFSDNQLQEGK	5512	Unambiguous	Transgelin-2 OS=Homo sapiens OX=9606 GN=TAGLN2 PE=1 SV=3 - [TAGL2_HUMAN]	1	1	P37802		HCD	1	0	1	1	0.002	0.0227	101	102	1.34	0	39	60	5910000	2	640.298	1279.59	0	-1.35	30.67	10513	10513	MS2	0/0	0	0	hala.raw
High	A	2	YLSEVASGDNK	4380	Unambiguous	14-3-3 protein beta/alpha OS=Homo sapiens OX=9606 GN=YWHAB PE=1 SV=3 - [1433B_HUMAN]	1	1	P31946		HCD	1	0	1	1	0.004	0.0514	120	124	1.69	0	59	60	4140000	2	591.782	1182.56	0	-6.18	30.67	10514	10514	MS2	0/0	0	0	hala.raw
High	A	2	LIPDGcGVK	6269	Unambiguous	60S ribosomal protein L10 OS=Homo sapiens OX=9606 GN=RPL10 PE=1 SV=4 - [RL10_HUMAN]	1	1	P27635	C6(Carbamidomethyl)	HCD	1	0	1	1	0.006	0.0899	185	188	1.51	0	75	20	2350000	2	479.755	958.503	0	0.24	30.68	10518	10518	MS2	0/0	0	0	hala.raw
High	A	2	LLEDLR	7191	Unambiguous	Keratin, type I cytoskeletal 18 OS=Homo sapiens OX=9606 GN=KRT18 PE=1 SV=2 - [K1C18_HUMAN]	3	1	P05783		HCD	1	0	1	1	0.003	0.0368	232	228	1.45	0	24	21	8250000	2	379.724	758.441	0	0.56	30.69	10521	10521	MS2	0/0	0	0	hala.raw
High	A	2	IIEDLR	7191	Unambiguous	Keratin, type I cytoskeletal 18 OS=Homo sapiens OX=9606 GN=KRT18 PE=1 SV=2 - [K1C18_HUMAN]	3	1	P05783		HCD	1	0	1	2	0.003	0.0368	232	228	1.45	0	24	21	8250000	2	379.724	758.441	0	0.56	30.69	10521	10521	MS2	0/0	0	0	hala.raw
High	A	2	VVTDTDETELAR	7198	Unambiguous	Eukaryotic translation initiation factor 2 subunit 1 OS=Homo sapiens OX=9606 GN=EIF2S1 PE=1 SV=3 - [IF2A_HUMAN]	1	1	P05198		HCD	1	0	1	1	0	3.53e-07	167	195	2.87	0	40	60	9190000	2	674.833	1348.66	0	0.34	30.7	10524	10524	MS2	0/0	0	0	hala.raw
High	A	2	SNVSDAVAQSTR	4643	Unambiguous	Triosephosphate isomerase OS=Homo sapiens OX=9606 GN=TPI1 PE=1 SV=3 - [TPIS_HUMAN]	1	1	P60174		HCD	1	0	1	1	0	0.000291	171	178	2.42	0	48	60	7790000	2	617.804	1234.6	0	-1.62	30.7	10525	10525	MS2	0/0	0	0	hala.raw
Middle	A	2	SHMMDVQGSTQDSAIK	6748	Unambiguous	Protein disulfide-isomerase A4 OS=Homo sapiens OX=9606 GN=PDIA4 PE=1 SV=2 - [PDIA4_HUMAN]	1	1	P13667		HCD	1	0	1	1	0.012	0.163	84	79	0.99	0		60	0	2	867.894	1734.78	0	0.69	30.7	10526	10526	MS2	0/0	0	0	hala.raw
Middle	A	2	LRDADPILR	7204	Unambiguous	Carbamoyl-phosphate synthase [ammonia], mitochondrial OS=Homo sapiens OX=9606 GN=CPS1 PE=1 SV=2 - [CPSM_HUMAN]	1	1	P31327		HCD	1	0	1	1	0.03	0.33	88	97	1.99	1	60	14	5240000	2	534.813	1068.62	0	2.22	30.7	10527	10527	MS2	0/0	0	0	hala.raw
High	A	2	EEGETADTVGccSLR	7210	Unambiguous	DNA topoisomerase 1 OS=Homo sapiens OX=9606 GN=TOP1 PE=1 SV=2 - [TOP1_HUMAN]	1	1	P11387	C11(Carbamidomethyl); C12(Carbamidomethyl)	HCD	1	0	1	1	0	1.55e-05	26	23	2.26	0	24	60	3850000	2	842.352	1683.7	0	0.67	30.72	10532	10532	MS2	0/0	0	0	hala.raw
High	A	2	MEEESGAPGVPSGNGAPGPK	7214	Unambiguous	Heterogeneous nuclear ribonucleoprotein M OS=Homo sapiens OX=9606 GN=HNRNPM PE=1 SV=3 - [HNRPM_HUMAN]	1	1	P52272		HCD	1	0	1	1	0	0.00383	87	92	2.06	0	55	60	2140000	2	934.425	1867.84	0	-3.21	30.73	10535	10535	MS2	0/0	0	0	hala.raw
High	A	2	LSVDYGK	5156	Unambiguous	Tubulin alpha-1A chain OS=Homo sapiens OX=9606 GN=TUBA1A PE=1 SV=1 - [TBA1A_HUMAN]|Tubulin alpha-1B chain OS=Homo sapiens OX=9606 GN=TUBA1B PE=1 SV=1 - [TBA1B_HUMAN]|Tubulin alpha-1C chain OS=Homo sapiens OX=9606 GN=TUBA1C PE=1 SV=1 - [TBA1C_HUMAN]|Tubulin alpha-4A chain OS=Homo sapiens OX=9606 GN=TUBA4A PE=1 SV=1 - [TBA4A_HUMAN]	5	2	Q9BQE3;P68366		HCD	1	0	1	1	0.002	0.0271	94	104	1.22	0	33	38	3550000	2	391.209	781.41	0	1.76	30.74	10540	10540	MS2	0/0	0	0	hala.raw
High	A	2	SSFYPDGGDQETAK	7222	Unambiguous	Bcl-2-associated transcription factor 1 OS=Homo sapiens OX=9606 GN=BCLAF1 PE=1 SV=2 - [BCLF1_HUMAN]	1	1	Q9NYF8		HCD	1	0	1	1	0.004	0.0521	41	42	0.98	0	41	60	1960000	2	751.325	1501.64	0	-0.56	30.74	10541	10541	MS2	0/0	0	0	hala.raw
High	A	2	HGESAWNLENR	7224	Unambiguous	Phosphoglycerate mutase 1 OS=Homo sapiens OX=9606 GN=PGAM1 PE=1 SV=2 - [PGAM1_HUMAN]	1	1	P18669		HCD	1	0	1	1	0	0.000113	104	84	2.14	0	64	60	2630000	2	656.805	1312.6	0	-0.27	30.74	10542	10542	MS2	0/0	0	0	hala.raw
Middle	A	2	WSLQSEAHR	7226	Unambiguous	Fascin OS=Homo sapiens OX=9606 GN=FSCN1 PE=1 SV=3 - [FSCN1_HUMAN]	1	1	Q16658		HCD	1	0	1	1	0.041	0.412	136	148	1.22	0	68	38	3030000	2	557.281	1113.55	0.01	9.43	30.75	10543	10543	MS2	0/0	0	0	hala.raw
High	A	2	TANDMIHAENMR	6169	Unambiguous	Moesin OS=Homo sapiens OX=9606 GN=MSN PE=1 SV=3 - [MOES_HUMAN]	1	1	P26038		HCD	1	0	1	1	0	0.000382	54	63	1.98	0	58	60	2530000	2	701.812	1402.62	0	-2.69	30.75	10544	10544	MS2	0/0	0	0	hala.raw
High	A	2	FLEEATR	5617	Unambiguous	Carbamoyl-phosphate synthase [ammonia], mitochondrial OS=Homo sapiens OX=9606 GN=CPS1 PE=1 SV=2 - [CPSM_HUMAN]	1	1	P31327		HCD	1	0	1	1	0.007	0.0988	190	193	1.54	0	38	57	1940000	2	433.224	865.44	0	-1.55	30.75	10546	10546	MS2	0/0	0	0	hala.raw
High	A	2	ASLENSLR	6344	Unambiguous	Keratin, type I cytoskeletal 18 OS=Homo sapiens OX=9606 GN=KRT18 PE=1 SV=2 - [K1C18_HUMAN]	1	1	P05783		HCD	1	0	1	1	0	0.00852	247	275	1.62	0	48	20	6360000	2	445.241	889.474	0	0.2	30.76	10549	10549	MS2	0/0	0	0	hala.raw
High	A	2	LAADDFR	7242	Unambiguous	Keratin, type I cytoskeletal 17 OS=Homo sapiens OX=9606 GN=KRT17 PE=1 SV=2 - [K1C17_HUMAN]|Keratin, type I cytoskeletal 18 OS=Homo sapiens OX=9606 GN=KRT18 PE=1 SV=2 - [K1C18_HUMAN]|Keratin, type I cytoskeletal 19 OS=Homo sapiens OX=9606 GN=KRT19 PE=1 SV=4 - [K1C19_HUMAN]|Keratin, type I cytoskeletal 10 OS=Homo sapiens OX=9606 GN=KRT10 PE=1 SV=6 - [K1C10_HUMAN]	17	4	Q04695;P05783;P08727;P13645		HCD	1	0	1	1	0.001	0.0158	156	154	1.46	0	21	3	49400000	2	404.204	807.4	0	0.82	30.77	10553	10553	MS2	0/0	0	0	hala.raw
High	A	2	ASGNYATVISHNPETK	6861	Unambiguous	60S ribosomal protein L8 OS=Homo sapiens OX=9606 GN=RPL8 PE=1 SV=2 - [RL8_HUMAN]	1	1	P62917		HCD	1	0	1	1	0	1.03e-05	185	191	2.48	0	40	60	5580000	3	563.613	1688.83	0	0.83	30.77	10554	10554	MS2	0/0	0	0	hala.raw
High	A	2	HQEGEIFDTEK	5916	Unambiguous	60S ribosomal protein L6 OS=Homo sapiens OX=9606 GN=RPL6 PE=1 SV=3 - [RL6_HUMAN]	1	1	Q02878		HCD	1	0	1	1	0	0.00028	79	88	2.61	0	15	60	4380000	2	666.805	1332.6	0	-2.81	30.77	10555	10555	MS2	0/0	0	0	hala.raw
Middle	A	2	IQFKPDDGTTPER	6609	Unambiguous	Far upstream element-binding protein 1 OS=Homo sapiens OX=9606 GN=FUBP1 PE=1 SV=3 - [FUBP1_HUMAN]	1	1	Q96AE4		HCD	1	0	1	1	0.04	0.408	187	213	1.16	0	52	60	2160000	2	752.381	1503.75	0	6.62	30.77	10557	10557	MS2	0/0	0	0	hala.raw
High	A	2	AYTNFDAER	6443	Unambiguous	Annexin A2 OS=Homo sapiens OX=9606 GN=ANXA2 PE=1 SV=2 - [ANXA2_HUMAN]	2	1	P07355		HCD	1	0	1	1	0.003	0.0395	61	58	1.2	0	58	10	8770000	2	543.747	1086.49	0	1.4	30.78	10560	10560	MS2	0/0	0	0	hala.raw
High	A	2	GGGQIIPTAR	7258	Unambiguous	Elongation factor 2 OS=Homo sapiens OX=9606 GN=EEF2 PE=1 SV=4 - [EF2_HUMAN]|116 kDa U5 small nuclear ribonucleoprotein component OS=Homo sapiens OX=9606 GN=EFTUD2 PE=1 SV=1 - [U5S1_HUMAN]	2	2	P13639;Q15029		HCD	1	0	1	1	0.001	0.011	118	116	2.02	0	38	8	17800000	2	485.277	969.547	0	-0.57	30.78	10562	10562	MS2	0/0	0	0	hala.raw
High	A	2	DSYVGDEAQSK	2007	Unambiguous	Actin, alpha cardiac muscle 1 OS=Homo sapiens OX=9606 GN=ACTC1 PE=1 SV=1 - [ACTC_HUMAN]|Actin, cytoplasmic 1 OS=Homo sapiens OX=9606 GN=ACTB PE=1 SV=1 - [ACTB_HUMAN]	6	2	P68032;P60709		HCD	1	0	1	1	0.001	0.017	61	56	1.36	0	54	30	6340000	2	599.766	1198.52	0	1.31	30.79	10563	10563	MS2	0/0	0	0	hala.raw
High	A	2	IKDPDASKPEDWDER	5754	Unambiguous	Calreticulin OS=Homo sapiens OX=9606 GN=CALR PE=1 SV=1 - [CALR_HUMAN]	1	1	P27797		HCD	1	0	1	1	0	0.00334	139	141	1.87	1	66	60	1400000	2	900.924	1800.84	0	0.09	30.8	10567	10567	MS2	0/0	0	0	hala.raw
High	A	2	TPAQYDASELK	6372	Unambiguous	Annexin A2 OS=Homo sapiens OX=9606 GN=ANXA2 PE=1 SV=2 - [ANXA2_HUMAN]	2	1	P07355		HCD	1	0	1	1	0	3.5e-05	185	182	2.43	0	39	24	14000000	2	611.802	1222.6	0	0.77	30.8	10568	10568	MS2	0/0	0	0	hala.raw
High	A	2	RPAEDMEEEQAFK	6259	Unambiguous	Heterogeneous nuclear ribonucleoprotein K OS=Homo sapiens OX=9606 GN=HNRNPK PE=1 SV=1 - [HNRPK_HUMAN]	1	1	P61978		HCD	1	0	1	1	0.001	0.0124	67	57	2.15	0	41	60	4900000	2	790.356	1579.71	0	-0.19	30.8	10569	10569	MS2	0/0	0	0	hala.raw
Middle	A	2	YLSNAYAR	7272	Unambiguous	Chloride intracellular channel protein 1 OS=Homo sapiens OX=9606 GN=CLIC1 PE=1 SV=4 - [CLIC1_HUMAN]	1	1	O00299		HCD	1	0	1	1	0.015	0.2	107	96	0.98	0	79	44	2610000	2	479.244	957.48	0	1.08	30.8	10570	10570	MS2	0/0	0	0	hala.raw
High	A	2	DHAVVVGVYRPPPK	7280	Unambiguous	rRNA 2'-O-methyltransferase fibrillarin OS=Homo sapiens OX=9606 GN=FBL PE=1 SV=2 - [FBRL_HUMAN]	1	1	P22087		HCD	1	0	1	1	0	0.00019	128	133	2.59	0	45	32	4470000	3	511.956	1533.85	0	0.72	30.83	10578	10578	MS2	0/0	0	0	hala.raw
High	A	2	LTTDFGNAEK	7284	Unambiguous	Transferrin receptor protein 1 OS=Homo sapiens OX=9606 GN=TFRC PE=1 SV=2 - [TFR1_HUMAN]	1	1	P02786		HCD	1	0	1	1	0	0.00169	141	140	1.47	0	70	7	9550000	2	548.269	1095.53	0	-0.62	30.84	10581	10581	MS2	0/0	0	0	hala.raw
High	A	2	SVTEQGAELSNEER	5101	Unambiguous	14-3-3 protein zeta/delta OS=Homo sapiens OX=9606 GN=YWHAZ PE=1 SV=1 - [1433Z_HUMAN]	1	1	P63104		HCD	1	0	1	1	0	5.83e-07	111	94	2.75	0	25	60	4160000	2	774.86	1548.71	0	-1.2	30.84	10582	10582	MS2	0/0	0	0	hala.raw
High	A	2	FEHcNFNDVTTR	7290	Unambiguous	CD59 glycoprotein OS=Homo sapiens OX=9606 GN=CD59 PE=1 SV=1 - [CD59_HUMAN]	1	1	P13987	C4(Carbamidomethyl)	HCD	1	0	1	1	0	0.000603	28	41	2.23	0	24	60	3240000	2	770.333	1539.66	0	-3.3	30.85	10585	10585	MS2	0/0	0	0	hala.raw
High	A	2	HGESAWNLENR	7224	Unambiguous	Phosphoglycerate mutase 1 OS=Homo sapiens OX=9606 GN=PGAM1 PE=1 SV=2 - [PGAM1_HUMAN]	1	1	P18669		HCD	1	0	1	1	0.003	0.0431	105	87	2.14	0	61	37	1780000	3	438.205	1312.6	0	-2.07	30.85	10587	10587	MS2	0/0	0	0	hala.raw
High	A	2	LITEDVQGK	5535	Unambiguous	40S ribosomal protein S3a OS=Homo sapiens OX=9606 GN=RPS3A PE=1 SV=2 - [RS3A_HUMAN]	1	1	P61247		HCD	1	0	1	1	0.004	0.0547	364	338	1.37	0	56	13	4830000	2	501.779	1002.55	0	3.07	30.86	10593	10593	MS2	0/0	0	0	hala.raw
High	A	2	SIGTANRPMGAGEALR	7304	Unambiguous	Interleukin enhancer-binding factor 3 OS=Homo sapiens OX=9606 GN=ILF3 PE=1 SV=3 - [ILF3_HUMAN]	1	1	Q12906		HCD	1	0	1	1	0	4.74e-05	195	192	2	0	67	24	4390000	3	534.279	1600.82	0	0.75	30.86	10594	10594	MS2	0/0	0	0	hala.raw
Middle	A	2	KLPFQR	6908	Unambiguous	Histone H3.1 OS=Homo sapiens OX=9606 GN=HIST1H3A PE=1 SV=2 - [H31_HUMAN]	7	1	P68431		HCD	1	0	1	1	0.018	0.231	175	180	1.78	1	18	7	22500000	2	394.743	788.478	0	0.23	30.87	10597	10597	MS2	0/0	0	0	hala.raw
High	A	2	DIDIHEVR	7312	Unambiguous	Heterogeneous nuclear ribonucleoprotein U OS=Homo sapiens OX=9606 GN=HNRNPU PE=1 SV=6 - [HNRPU_HUMAN]	1	1	Q00839		HCD	1	0	1	1	0.003	0.0471	133	134	1.38	0	70	8	8660000	2	498.759	996.51	0	-0.82	30.87	10600	10600	MS2	0/0	0	0	hala.raw
High	A	2	STAGDTHLGGEDFDNR	6272	Unambiguous	Heat shock cognate 71 kDa protein OS=Homo sapiens OX=9606 GN=HSPA8 PE=1 SV=1 - [HSP7C_HUMAN]	2	1	P11142		HCD	1	0	1	1	0.007	0.095	40	37	1.24	0	59	28	6950000	3	564.581	1691.73	0	0.88	30.88	10601	10601	MS2	0/0	0	0	hala.raw
High	A	2	HTGPNSPDTANDGFVR	5021	Unambiguous	Heterogeneous nuclear ribonucleoprotein H2 OS=Homo sapiens OX=9606 GN=HNRNPH2 PE=1 SV=1 - [HNRH2_HUMAN]|Heterogeneous nuclear ribonucleoprotein H OS=Homo sapiens OX=9606 GN=HNRNPH1 PE=1 SV=4 - [HNRH1_HUMAN]	2	2	P55795;P31943		HCD	1	0	1	1	0	0.0067	98	98	1.72	0	60	60	1840000	2	842.887	1684.77	0	-0.63	30.88	10604	10604	MS2	0/0	0	0	hala.raw
High	A	2	VEPHATIAEIK	7324	Unambiguous	Very-long-chain enoyl-CoA reductase OS=Homo sapiens OX=9606 GN=TECR PE=1 SV=1 - [TECR_HUMAN]	1	1	Q9NZ01		HCD	1	0	1	1	0.002	0.0251	158	162	1.55	0	56	60	4530000	2	604.339	1207.67	0	1.39	30.89	10607	10607	MS2	0/0	0	0	hala.raw
Middle	A	2	EQISSGHNmVEGEGAPK	5624	Unambiguous	F-box only protein 40 OS=Homo sapiens OX=9606 GN=FBXO40 PE=2 SV=2 - [FBX40_HUMAN]	1	1	Q9UH90	M9(Oxidation)	HCD	1	0	1	1	0.015	0.199	96	103	1.9	0	16	60	3030000	2	893.413	1785.82	0.01	6.29	30.89	10608	10608	MS2	0/0	0	0	hala.raw
High	A	2	VIGSGcNLDSAR	5297	Unambiguous	L-lactate dehydrogenase B chain OS=Homo sapiens OX=9606 GN=LDHB PE=1 SV=2 - [LDHB_HUMAN]|L-lactate dehydrogenase A chain OS=Homo sapiens OX=9606 GN=LDHA PE=1 SV=2 - [LDHA_HUMAN]	4	2	P07195;P00338	C6(Carbamidomethyl)	HCD	1	0	1	1	0	9.76e-07	151	123	2.24	0	8	8	36400000	2	624.803	1248.6	0	-0.42	30.9	10610	10610	MS2	0/0	0	0	hala.raw
High	A	2	VALHLDEEDK	7338	Unambiguous	Kynureninase OS=Homo sapiens OX=9606 GN=KYNU PE=1 SV=1 - [KYNU_HUMAN]	1	1	Q16719		HCD	1	0	1	1	0.003	0.039	153	142	1.43	0	58	60	4660000	2	584.795	1168.58	0	-1.03	30.9	10614	10614	MS2	0/0	0	0	hala.raw
High	A	2	cYEMASHLR	4981	Unambiguous	Profilin-1 OS=Homo sapiens OX=9606 GN=PFN1 PE=1 SV=2 - [PROF1_HUMAN]	1	1	P07737	C1(Carbamidomethyl)	HCD	1	0	1	1	0	0.00254	67	61	1.95	0	49	60	3870000	3	389.508	1166.51	0	0.77	30.9	10615	10615	MS2	0/0	0	0	hala.raw
Middle	A	2	GVPLYR	6112	Unambiguous	Alpha-enolase OS=Homo sapiens OX=9606 GN=ENO1 PE=1 SV=2 - [ENOA_HUMAN]	2	1	P06733		HCD	1	0	1	1	0.045	0.443	132	154	1.13	0	27	60	2030000	2	352.708	704.409	0	0.05	30.91	10619	10619	MS2	0/0	0	0	hala.raw
High	A	2	MINTDLSR	7353	Unambiguous	60S ribosomal protein L4 OS=Homo sapiens OX=9606 GN=RPL4 PE=1 SV=5 - [RL4_HUMAN]	1	1	P36578		HCD	1	0	1	1	0	0.00185	218	223	2.05	0	29	9	18700000	2	475.243	949.478	0	0.67	30.92	10623	10623	MS2	0/0	0	0	hala.raw
High	A	2	QEYDESGPSIVHR	5898	Unambiguous	Actin, cytoplasmic 1 OS=Homo sapiens OX=9606 GN=ACTB PE=1 SV=1 - [ACTB_HUMAN]	7	1	P60709		HCD	1	0	1	1	0	1.32e-06	90	103	2.42	0	70	10	18700000	2	758.856	1516.7	0	0.95	30.92	10624	10624	MS2	0/0	0	0	hala.raw
High	A	2	ILSGVVTK	7357	Unambiguous	40S ribosomal protein S11 OS=Homo sapiens OX=9606 GN=RPS11 PE=1 SV=3 - [RS11_HUMAN]	1	1	P62280		HCD	1	0	1	1	0.007	0.0977	64	57	1.21	0	61	23	4430000	2	408.763	816.518	0	-0.98	30.93	10625	10625	MS2	0/0	0	0	hala.raw
High	A	2	EIAQDFK	4854	Unambiguous	Histone H3.1 OS=Homo sapiens OX=9606 GN=HIST1H3A PE=1 SV=2 - [H31_HUMAN]	4	1	P68431		HCD	1	0	1	1	0.007	0.0986	133	162	1.15	0	10	7	26000000	2	425.719	850.431	0	0.12	30.94	10631	10631	MS2	0/0	0	0	hala.raw
High	A	2	EVATNSELVQSGK	4862	Unambiguous	Keratin, type I cytoskeletal 17 OS=Homo sapiens OX=9606 GN=KRT17 PE=1 SV=2 - [K1C17_HUMAN]	2	1	Q04695		HCD	1	0	1	1	0	8.61e-06	218	208	2.72	0	9	54	11600000	2	681.349	1361.69	0	0.42	30.94	10632	10632	MS2	0/0	0	0	hala.raw
Middle	A	2	VcNPIITK	7372	Unambiguous	Heat shock cognate 71 kDa protein OS=Homo sapiens OX=9606 GN=HSPA8 PE=1 SV=1 - [HSP7C_HUMAN]	1	1	P11142	C2(Carbamidomethyl)	HCD	1	0	1	1	0.031	0.336	210	198	1.04	0	41	7	11800000	2	472.767	944.526	0	3.19	30.94	10633	10633	MS2	0/0	0	0	hala.raw
High	A	2	AQNTWGcGNSLR	7374	Unambiguous	Prelamin-A/C OS=Homo sapiens OX=9606 GN=LMNA PE=1 SV=1 - [LMNA_HUMAN]	1	1	P02545	C7(Carbamidomethyl)	HCD	1	0	1	1	0	3.68e-05	86	81	2.04	0	47	21	11000000	2	682.312	1363.62	0	0.28	30.95	10635	10635	MS2	0/0	0	0	hala.raw
High	A	2	SIGTANRPMGAGEALR	7304	Unambiguous	Interleukin enhancer-binding factor 3 OS=Homo sapiens OX=9606 GN=ILF3 PE=1 SV=3 - [ILF3_HUMAN]	1	1	Q12906		HCD	1	0	1	1	0	1.94e-05	195	202	3.49	0	24	60	4960000	2	800.917	1600.83	0	2.55	30.95	10636	10636	MS2	0/0	0	0	hala.raw
High	A	2	TPGPGAQSALR	3894	Unambiguous	40S ribosomal protein S14 OS=Homo sapiens OX=9606 GN=RPS14 PE=1 SV=3 - [RS14_HUMAN]	1	1	P62263		HCD	1	0	1	1	0	0.0104	160	154	1.43	0	77	15	4170000	2	527.789	1054.57	0	5.41	30.95	10637	10637	MS2	0/0	0	0	hala.raw
High	A	2	LMSNLDSNR	5071	Unambiguous	Protein S100-A4 OS=Homo sapiens OX=9606 GN=S100A4 PE=1 SV=1 - [S10A4_HUMAN]	1	1	P26447		HCD	1	0	1	1	0	0.00374	138	136	1.64	0	23	14	11700000	2	525.256	1049.5	0	-0.26	30.95	10639	10639	MS2	0/0	0	0	hala.raw
High	A	2	DISTNYYASQK	7384	Unambiguous	Endoplasmin OS=Homo sapiens OX=9606 GN=HSP90B1 PE=1 SV=1 - [ENPL_HUMAN]	1	1	P14625		HCD	1	0	1	1	0	0.000681	97	95	1.85	0	52	60	6270000	2	645.305	1289.6	0	0.88	30.95	10640	10640	MS2	0/0	0	0	hala.raw
High	A	2	VEIIANDQGNR	5811	Unambiguous	Heat shock cognate 71 kDa protein OS=Homo sapiens OX=9606 GN=HSPA8 PE=1 SV=1 - [HSP7C_HUMAN]|Endoplasmic reticulum chaperone BiP OS=Homo sapiens OX=9606 GN=HSPA5 PE=1 SV=2 - [BIP_HUMAN]|Heat shock 70 kDa protein 1-like OS=Homo sapiens OX=9606 GN=HSPA1L PE=1 SV=2 - [HS71L_HUMAN]|Heat shock 70 kDa protein 1A OS=Homo sapiens OX=9606 GN=HSPA1A PE=1 SV=1 - [HS71A_HUMAN]|Heat shock 70 kDa protein 6 OS=…	7	3	P11142;P11021;P0DMV8		HCD	1	0	1	1	0	0.000372	163	179	1.99	0	38	9	24100000	2	614.818	1228.63	0	0.59	30.96	10642	10642	MS2	0/0	0	0	hala.raw
High	A	2	VEILANDQGNR	5811	Unambiguous	Heat shock cognate 71 kDa protein OS=Homo sapiens OX=9606 GN=HSPA8 PE=1 SV=1 - [HSP7C_HUMAN]|Endoplasmic reticulum chaperone BiP OS=Homo sapiens OX=9606 GN=HSPA5 PE=1 SV=2 - [BIP_HUMAN]|Heat shock 70 kDa protein 1-like OS=Homo sapiens OX=9606 GN=HSPA1L PE=1 SV=2 - [HS71L_HUMAN]|Heat shock 70 kDa protein 1A OS=Homo sapiens OX=9606 GN=HSPA1A PE=1 SV=1 - [HS71A_HUMAN]|Heat shock 70 kDa protein 6 OS=…	7	3	P11142;P11021;P0DMV8		HCD	1	0	1	2	0	0.000372	163	179	1.99	0	38	9	24100000	2	614.818	1228.63	0	0.59	30.96	10642	10642	MS2	0/0	0	0	hala.raw
Middle	A	2	HEQNIDcGGGYVK	3439	Unambiguous	Calreticulin OS=Homo sapiens OX=9606 GN=CALR PE=1 SV=1 - [CALR_HUMAN]	1	1	P27797	C7(Carbamidomethyl)	HCD	1	0	1	1	0.013	0.179	51	54	1.29	0	40	60	1630000	2	738.828	1476.65	0	-3.5	30.96	10643	10643	MS2	0/0	0	0	hala.raw
High	A	2	ESVFTVEGGHR	7393	Unambiguous	Prohibitin-2 OS=Homo sapiens OX=9606 GN=PHB2 PE=1 SV=2 - [PHB2_HUMAN]	1	1	Q99623		HCD	1	0	1	1	0	0.00402	143	156	2.04	0	35	60	6720000	2	609.302	1217.6	0	5.22	30.97	10645	10645	MS2	0/0	0	0	hala.raw
High	A	2	FAcFER	7395	Unambiguous	Phosphate carrier protein, mitochondrial OS=Homo sapiens OX=9606 GN=SLC25A3 PE=1 SV=2 - [MPCP_HUMAN]	1	1	Q00325	C3(Carbamidomethyl)	HCD	1	0	1	1	0.007	0.106	28	30	1	0	65	11	5660000	2	415.187	829.367	0	0.84	30.97	10646	10646	MS2	0/0	0	0	hala.raw
Middle	A	2	ENAEVDGDDDAEEMEAK	5961	Unambiguous	Eukaryotic translation initiation factor 2 subunit 1 OS=Homo sapiens OX=9606 GN=EIF2S1 PE=1 SV=3 - [IF2A_HUMAN]	1	1	P05198		HCD	1	0	1	1	0.034	0.364	6	8	1.18	0	50	60	1380000	2	933.865	1866.72	0	2.63	30.97	10648	10648	MS2	0/0	0	0	hala.raw
[truncated: 13,444 more rows]
